# Supplementary material for: Defluorinative alkylation of 1-trifluoromethyl alkenes with alkyl radicals derived from visible light-induced deoxygenation of xanthate salts: synthesis of gem-difluoroalkenes
Source: Royal Society of Chemistry journal article supplement (doi:10.1039/d3ob00333g), 2023-01-01

## Supporting Information

### Defluorinative Alkylation of 1-Trifluoromethyl Alkenes with Alkyl radicals Derived from Visible-Light Induced Deoxygenation of Xanthate Salts: Synthesis of gem-Difluoroalkenes

Xin Li,<sup>a #</sup> Yan Jiao,<sup>a #</sup> Lifei Han,<sup>\* b</sup> Jinwei Sun,<sup>a</sup> Xuan Zhang<sup>\* a</sup>

<sup>a</sup>School of Chemistry and Materials Science, Institute of Advanced Materials and Flexible Electronics (IAMFE), Nanjing University of Information Science and Technology, 219 Ningliu Road, Nanjing 210044, China.

<sup>b</sup>Breast Disease Center, Zhongda Hospital, School of Medicine, Southeast University, Nanjing 210009, China.

<sup>#</sup>These authors contributed equally.

E-mail: [1902994755@qq.com](mailto:1902994755@qq.com); [xuanzhang@nuist.edu.cn](mailto:xuanzhang@nuist.edu.cn)

### Table of Contents

|                                                                             |     |
|-----------------------------------------------------------------------------|-----|
| 1. General Information.....                                                 | S2  |
| 2. Optimization of reaction conditions.....                                 | S3  |
| 3. General Procedure for Synthesis of Xanthate Salts .....                  | S6  |
| 4. Preparation of Trifluoromethyl Alkenes .....                             | S7  |
| 5. General Procedure for Deoxygenative Difluoroallylation of Alcohols ..... | S16 |
| 6. Gram Scale Reaction.....                                                 | S39 |
| 7. Cyclic Voltammetry of <b>2l</b> and <b>2m</b> .....                      | S42 |
| 8. Mechanistic Studies .....                                                | S42 |
| 9. References.....                                                          | S48 |
| 10. Copies of NMR Spectra .....                                             | S49 |

## 1. General Information.

All new compounds were fully characterized. NMR spectra were recorded on JNM-ECZ400S/L1 and calibrated using residual undeuterated solvent CDCl<sub>3</sub>, DMSO-D6 (<sup>1</sup>H NMR spectra: CDCl<sub>3</sub>: 7.26 ppm, DMSO-D6: 2.50 ppm; <sup>13</sup>C NMR spectra: CDCl<sub>3</sub>: 77.00 ppm, DMSO-D6: 39.50 ppm). Mass spectra were conducted at Bruker MTQ III q-TOF (ESI) Mass Spectrometer. Cyclic voltammetry (CV) experiments were used on CHI660E. Measurements of UV-Vis absorption spectra were made on SHIMADZU UV-3600Plus. Anhydrous solvents, such as Dichloromethane (DCM), *N,N*-Dimethylacetamide (DMA), *N,N*-Dimethylformamide (DMF), Dimethyl sulfoxide (DMSO), Tetrahydrofuran (THF), Ethyl acetate (EA), Methanol (CH<sub>3</sub>OH), Acetonitrile (MeCN), Dichloroethane (DCE), *N*-Methyl-2-pyrrolidone (NMP) were purchased from Adamas. Anhydrous acetone was obtained by laboratory refining. Flash column chromatography was carried out using silica gel (General-Reagent, AR, 200-300 mesh, for column chromatography). All reactions were carried out in dried 20 mL vial under Nitrogen. Unless otherwise noted, materials were obtained from commercial suppliers and used without further purification. TEA and PE are the abbreviation of triethylamine and petroleum ether.

### Photoreaction setup:

All Photoredox reactions were subjected to irradiation from double 40W Kessil PR160L blue LED bulbs (456 nm), with the reaction tube placed approximately ~ 5 cm from the bulbs and using a fan to keep at room temperature (Figure S1).

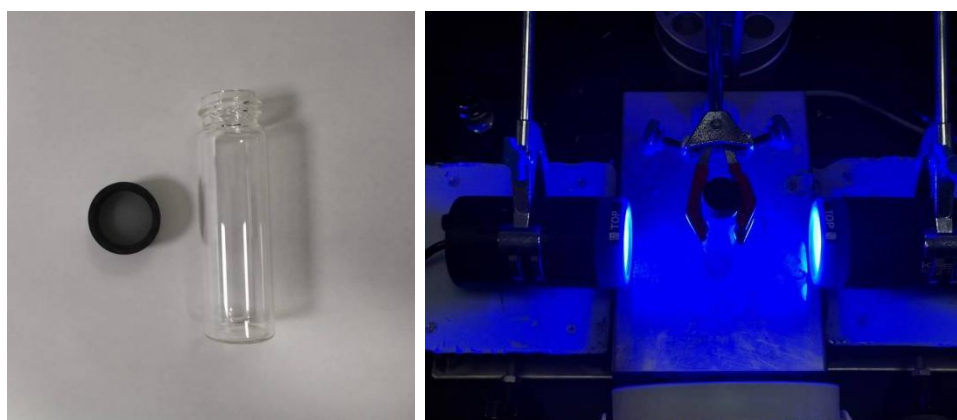

**Figure S1.** An over-dried 20 mL vial (left). Photoreaction setup (right).

## 2. Optimization of reaction conditions

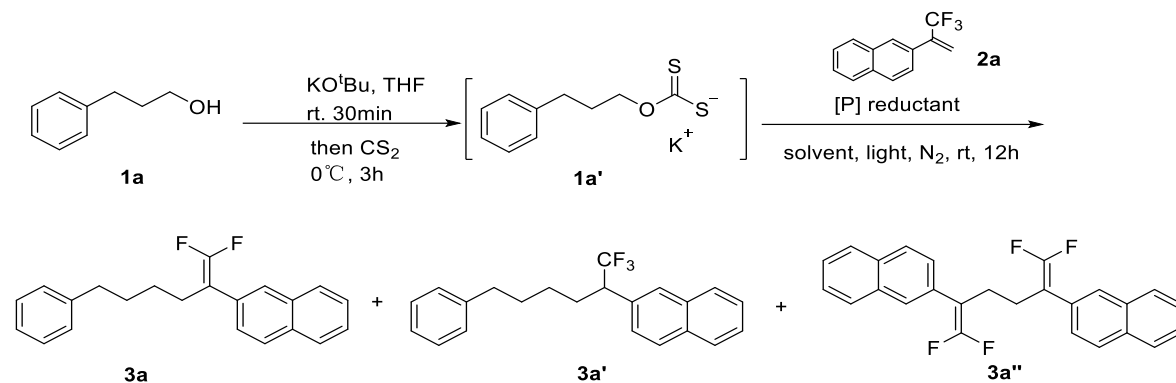

**Table S1.** Exploration of reductants<sup>a</sup>

| Entry    | Reductant                            | Yield of 3a (%) | Yield of 3a' (%) | Yield of 3a'' (%) | Recovery of 2a (%) |
|----------|--------------------------------------|-----------------|------------------|-------------------|--------------------|
| 1        | PPh <sub>3</sub>                     | 2               | 0                | 32                | 30                 |
| 2        | P <sup>n</sup> Bu <sub>3</sub>       | 60              | 0                | 2                 | 13                 |
| 3        | P(OEt) <sub>3</sub>                  | 3               | 0                | 28                | 40                 |
| 4        | P <sup>t</sup> Bu <sub>3</sub>       | 60              | 0.33             | 7.5               | 1                  |
| 5        | 1,4-bis(dicyclohexylphosphino)butane | 74              | 0                | 3.5               | 13                 |
| 6        | PCy <sub>3</sub>                     | 75              | 0                | 5                 | 13                 |
| 7        | Ph <sub>2</sub> PCy                  | 31              | 0                | 10.5              | 52                 |
| <b>8</b> | <b>PhPCy<sub>2</sub></b>             | <b>80</b>       | <b>0</b>         | <b>3.5</b>        | <b>10</b>          |

<sup>a</sup>Reaction conditions: **1a'** (0.1 mmol, 1 eq), **2a** (0.12 mmol, 1.2 eq), DMA (2 mL), Reductant (0.12 mmol, 1.2 eq), Kessil PR160L (456 nm), I = 25%, rt, 12 h, N<sub>2</sub> atmosphere. Yields were determined by <sup>19</sup>F NMR with 1, 4-Difluorobenzene (9.8 μL, 0.1 mmol) as an internal standard.

**Table S2.** Exploration of solvents<sup>a</sup>

| Entry     | Solvent                                    | Yield of<br>3a (%) | Yield of<br>3a' (%) | Yield of<br>3a'' (%) | Recovery<br>of 2a (%) |
|-----------|--------------------------------------------|--------------------|---------------------|----------------------|-----------------------|
| 9         | DMA (2 mL)                                 | 80                 | 0                   | 3.5                  | 10                    |
| 10        | DMF (2 mL)                                 | 80                 | 0                   | 3                    | 11                    |
| 11        | DMSO (2 mL)                                | 82                 | 0                   | 5                    | 9                     |
| 12        | THF (2 mL)                                 | 10                 | 0                   | 0                    | 85                    |
| 13        | EA (2 mL)                                  | 11                 | 0                   | 0                    | 92                    |
| 14        | Acetone (2 mL)                             | 83                 | 1.3                 | 1                    | 18                    |
| 15        | CH <sub>3</sub> OH (2 mL)                  | 0                  | 1.7                 | 0                    | 95                    |
| 16        | CH <sub>3</sub> CN (2 mL)                  | 78                 | 0                   | 2                    | 44                    |
| 17        | DCE (2 mL)                                 | 0                  | 0                   | 5                    | 91                    |
| 18        | NMP (2 mL)                                 | 75                 | 0.33                | 3.5                  | 7                     |
| 19        | DMSO/DCM=3/1 (2 mL)                        | 0                  | 0                   | 2                    | 91                    |
| 20        | CH <sub>3</sub> CN/DCM=3/1 (2 mL)          | 10                 | 0                   | 1                    | 93                    |
| 21        | DMSO/CH <sub>3</sub> CN=19/1 (2 mL)        | 78                 | 0                   | 7                    | 5                     |
| 22        | DMSO/CH <sub>3</sub> CN=9/1 (2 mL)         | 86                 | 0                   | 5                    | 8                     |
| 23        | DMSO/CH <sub>3</sub> CN=4/1 (2 mL)         | 82                 | 0                   | 4                    | 10                    |
| 24        | DMSO/CH <sub>3</sub> CN=3/1 (2 mL)         | 83                 | 0                   | 4                    | 9                     |
| 25        | DMSO/CH <sub>3</sub> CN=1/1 (2 mL)         | 79                 | 0                   | 3.5                  | 15                    |
| 26        | DMSO/CH <sub>3</sub> CN=1/3 (2 mL)         | 73                 | 0                   | 2                    | 21                    |
| 27        | DMSO/CH <sub>3</sub> CN=1/4 (2 mL)         | 79                 | 0                   | 2                    | 16                    |
| 28        | DMSO/CH <sub>3</sub> CN=1/9 (2 mL)         | 80                 | 0                   | 1.5                  | 16                    |
| 29        | Acetone/CH <sub>3</sub> CN=19/1 (2 mL)     | 86                 | 1.3                 | 3                    | 26                    |
| <b>30</b> | <b>Acetone/CH<sub>3</sub>CN=9/1 (2 mL)</b> | <b>90</b>          | <b>1</b>            | <b>3</b>             | <b>22</b>             |
| 31        | Acetone/CH <sub>3</sub> CN=4/1 (2 mL)      | 85                 | 0.67                | 3                    | 25                    |
| 32        | Acetone/CH <sub>3</sub> CN=3/1 (2 mL)      | 87                 | 1                   | 3                    | 25                    |
| 33        | Acetone/CH <sub>3</sub> CN=1/1 (2 mL)      | 87                 | 0.67                | 2.5                  | 21                    |
| 34        | Acetone/CH <sub>3</sub> CN=1/3 (2 mL)      | 77                 | 0.33                | 1.5                  | 19                    |
| 35        | Acetone/CH <sub>3</sub> CN=1/4 (2 mL)      | 81                 | 0.33                | 2                    | 24                    |
| 36        | Acetone/MeCN=9/1 (1 mL)                    | 76                 | 1                   | 3                    | 23                    |
| 37        | Acetone/MeCN=9/1 (4 mL)                    | 81                 | 1.7                 | 2                    | 19                    |

<sup>a</sup>Reaction conditions: **1a'** (0.1 mmol, 1 eq), **2a** (0.12 mmol, 1.2 eq), PhPCy<sub>2</sub> (0.12 mmol, 1.2 eq), Solvent, Kessil PR160L (456 nm), I = 25%, rt, 12 h, N<sub>2</sub> atmosphere. Yields were determined by



<sup>19</sup>F NMR with 1, 4-Difluorobenzene (9.8 μL, 0.1 mmol) as an internal standard.

**Table S3.** Exploration of light sources<sup>a</sup>

| Entry     | Light (nm) | Intensity (%) | Yield of <b>3a</b> (%) | Yield of <b>3a'</b> (%) | Yield of <b>3a''</b> (%) | Recovery of <b>2a</b> (%) |
|-----------|------------|---------------|------------------------|-------------------------|--------------------------|---------------------------|
| 38        | 390        | 25            | 78                     | 1.3                     | 4                        | 8                         |
| 39        | 427        | 25            | 83                     | 1                       | 2.5                      | 16                        |
| 40        | 440        | 25            | 83                     | 1                       | 3                        | 23                        |
| <b>41</b> | <b>456</b> | <b>25</b>     | <b>90</b>              | <b>1</b>                | <b>3</b>                 | <b>22</b>                 |
| 42        | 456        | 50            | 83                     | 1                       | 3                        | 13                        |
| 43        | 456        | 75            | 84                     | 1.3                     | 2.5                      | 18                        |
| 44        | 456        | 100           | 81                     | 1.3                     | 3                        | 13                        |

<sup>a</sup>Reaction conditions: **1a'** (0.1 mmol, 1 eq), **2a** (0.12 mmol, 1.2 eq), PhPCy<sub>2</sub> (0.12 mmol, 1.2 eq), Acetone/CH<sub>3</sub>CN = (1.8 mL/0.2mL), Kessil PR160L (λ nm), I (%), rt, 12 h, N<sub>2</sub> atmosphere. Yields were determined by <sup>19</sup>F NMR with 1, 4-Difluorobenzene (9.8 μL, 0.1 mmol) as an internal standard.

**Table S4.** Exploration of olefin and reductant contents<sup>a</sup>

| Entry     | Olefin content (eq) | Reductant content (eq) | Yield of <b>3a</b> (%) | Yield of <b>3a'</b> (%) | Yield of <b>3a''</b> (%) | Recovery of <b>2a</b> (%) |
|-----------|---------------------|------------------------|------------------------|-------------------------|--------------------------|---------------------------|
| 45        | 1.05                | 1.2                    | 75                     | 0.33                    | 2                        | 8                         |
| 46        | 1.1                 | 1.2                    | 79                     | 0.33                    | 2                        | 13                        |
| <b>47</b> | <b>1.2</b>          | <b>1.2</b>             | <b>90</b>              | <b>1</b>                | <b>3</b>                 | <b>22</b>                 |
| 48        | 1.2                 | 1.1                    | 85                     | 1.3                     | 2                        | 24                        |
| 49        | 1.2                 | 1.5                    | 84                     | 1.3                     | 2.5                      | 21                        |
| 50        | 1.2                 | 2.0                    | 82                     | 1.3                     | 2.5                      | 21                        |

<sup>a</sup>Reaction conditions: **1a'** (0.1 mmol, 1 eq), **2a**, PhPCy<sub>2</sub>, Acetone/CH<sub>3</sub>CN = (1.8 mL/0.2 mL), Kessil PR160L (456 nm), I = 25%, rt, 12 h, N<sub>2</sub> atmosphere. Yields were determined by <sup>19</sup>F NMR with 1, 4-Difluorobenzene (9.8 μL, 0.1 mmol) as an internal standard.

**Table S5.** Exploration of one-pot procedure and bases<sup>a</sup>

| Entry           | Base                             | Yield of<br>3a (%) | Yield of<br>3a' (%) | Yield of<br>3a'' (%) | Recovery<br>of 2a (%) |
|-----------------|----------------------------------|--------------------|---------------------|----------------------|-----------------------|
| 51              | KO <sup>t</sup> Bu (1.0 eq)      | 78                 | 1.2                 | 2                    | 18                    |
| 52              | KO <sup>t</sup> Bu (1.05 eq)     | 68                 | 1.2                 | 2                    | 28                    |
| <b>53</b>       | <b>KO<sup>t</sup>Bu (1.1 eq)</b> | <b>87</b>          | <b>1.8</b>          | <b>2.8</b>           | <b>19</b>             |
| 54              | NaH (1.1 eq)                     | 11                 | 2.5                 | 10                   | 38                    |
| 55              | NaOH (1.1 eq)                    | 2                  | 3.3                 | 13                   | 42                    |
| 56              | KOH (1.1 eq)                     | 19                 | 3.2                 | 12                   | 27                    |
| 57              | KHDMS (1.1 eq)                   | 74                 | 0.4                 | 2.5                  | 23                    |
| 58 <sup>b</sup> | KO <sup>t</sup> Bu (1.1 eq)      | 0                  | 0                   | 0                    | 99                    |
| 59 <sup>c</sup> | KO <sup>t</sup> Bu (1.1 eq)      | 0                  | 0                   | 0                    | 95                    |

<sup>a</sup>Reaction conditions: **1a** (0.1 mmol), base, CS<sub>2</sub> (0.3 mmol), THF (1 mL), 3 h. After the solvent was removed in vacuo, then **2a** (0.12 mmol), PPhCy<sub>2</sub> (0.12 mmol), acetone/CH<sub>3</sub>CN = 9:1 (2 mL), Kessil PR160L (456 nm), I = 25%, rt, 12 h, N<sub>2</sub> atmosphere. <sup>b</sup>no light. <sup>c</sup>no reductant. Yields were determined by <sup>19</sup>F NMR with 1, 4-Difluorobenzene (9.8 μL, 0.1 mmol) as an internal standard.

### 3. General Procedure for Synthesis of Xanthate Salts

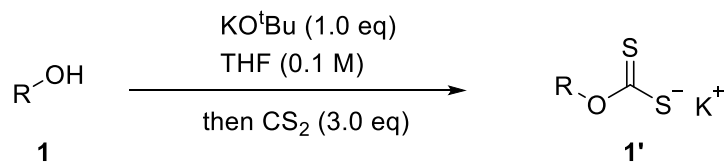

In a N<sub>2</sub>-filled glovebox, 250 mL round-bottom flask equipped with a magnetic stir bar was charged sequentially with alcohol **1** (10.0 mmol), **KO<sup>t</sup>Bu** (1.12 g, 10.0 mmol), and **dry THF** (100 mL). The flask was sealed with a septum cap and transferred out of the glovebox, and a balloon was attached. The reaction mixture was stirred at room temperature for 30 minutes, followed by the addition of **CS<sub>2</sub>** (1.8 mL, 30.0 mmol) via microsyringe at 0°C and continued to be stirred for 3 hours at 0°C before removing the solvent under reduced pressure. The solid was washed with Et<sub>2</sub>O (2 × 50 mL), and dried in vacuo to afford the desired product.<sup>1</sup>

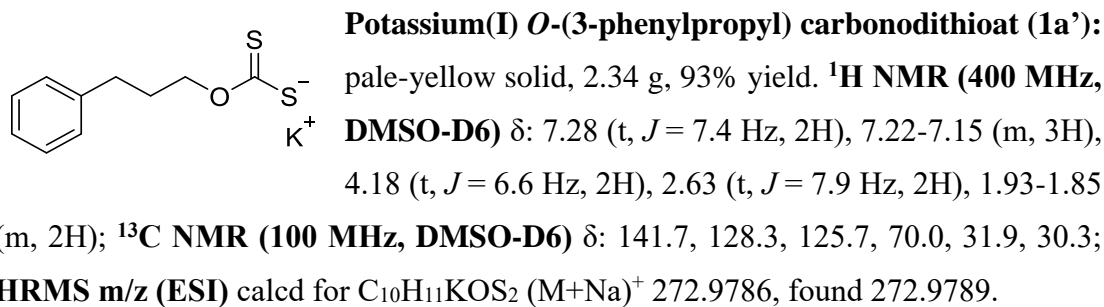

## 4. Preparation of Trifluoromethyl Alkenes

### Method A:<sup>2</sup>

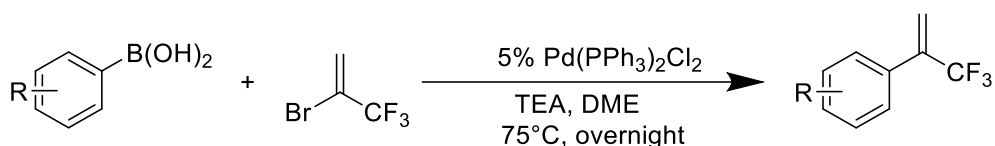

In a Schlenk tube equipped with stir bar, arylboronic acids (1.5 equiv.),  $\text{Pd}(\text{PPh}_3)_2\text{Cl}_2$  (5 mol%) were added. The vessel was evacuated and filled with nitrogen, then TEA (8.0 equiv.), DME (0.33 M) and  $\text{H}_2\text{O}$  (0.67 M) were added. After the addition of 2-bromo-3,3,3-trifluoropropene (1.0 equiv.), the solution was stirred at 75 °C overnight (TLC tracking detection). The mixture was purified by column chromatography to afford the corresponding trifluoromethyl alkenes. (Note: the products might be volatile under high vacuum).

### Method B:<sup>2</sup>

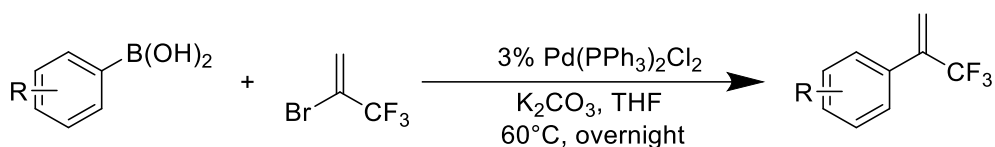

In a Schlenk tube equipped with stir bar, arylboronic acids (1.0 equiv.),  $\text{Pd}(\text{PPh}_3)_2\text{Cl}_2$  (3 mol%) and  $\text{K}_2\text{CO}_3$  (4.0 equiv.) were added. The vessel was evacuated and filled with nitrogen, then THF (0.33 M) and  $\text{H}_2\text{O}$  (0.5 M) were added. After the

addition of 2-bromo-3,3,3-trifluoropropene (2.0 equiv.), the solution was stirred at 60 °C overnight (TLC tracking detection). The mixture was purified by column chromatography to afford the corresponding trifluoromethyl alkenes. (Note: the products might be volatile under high vacuum).

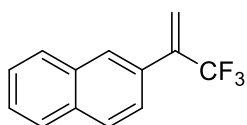

**2-(3,3,3-trifluoroprop-1-en-2-yl)naphthalene (2a)** : According to Method A, the reaction was carried out with the corresponding arylboronic acid (5.16 g, 30.00 mmol), Pd(PPh<sub>3</sub>)<sub>2</sub>Cl<sub>2</sub> (701.9 mg, 1.02 mmol), TEA (8 mL, 142.50 mmol), DME (60 mL) and H<sub>2</sub>O (30 mL), 2-bromo-3,3,3-trifluoropropene (2.08 mL, 20.00 mmol). The crude product was purified by flash column chromatography on silica gel (PE) to afford 4.09 g (92% yield) of **2a** as a white solid: <sup>1</sup>H NMR (400 MHz, CDCl<sub>3</sub>) δ: 7.94-7.85 (m, 4H), 7.58-7.51 (m, 3H), 6.05 (s, 1H), 5.91 (s, 1H). All data are in accordance with the literature.<sup>2</sup>

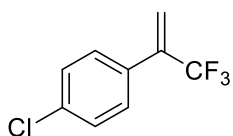

**1-Chloro-4-(3,3,3-trifluoroprop-1-en-2-yl)benzene (2b)** : According to Method A, the reaction was carried out with the corresponding arylboronic acid (1.88 g, 12.00 mmol), Pd(PPh<sub>3</sub>)<sub>2</sub>Cl<sub>2</sub> (285.7 mg, 0.41 mmol), TEA (8 mL, 57.00 mmol), DME (24 mL) and H<sub>2</sub>O (12 mL), 2-bromo-3,3,3-trifluoropropene (0.83 mL, 8.00 mmol). The crude product was purified by flash column chromatography on silica gel (PE) to afford 0.64 g (39% yield) of **2b** as a yellow oil: <sup>1</sup>H NMR (400 MHz, CDCl<sub>3</sub>) δ: 7.40-7.35 (m, 4H), 5.98 (s, 1H), 5.77 (s, 1H). All data are in accordance with the literature.<sup>2</sup>

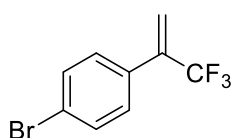

**1-Bromo-4-(3,3,3-trifluoroprop-1-en-2-yl)benzene (2c)** : According to Method A, the reaction was carried out with the corresponding arylboronic acid (2.41 g, 12.00 mmol), Pd(PPh<sub>3</sub>)<sub>2</sub>Cl<sub>2</sub> (285.7 mg, 0.41 mmol), TEA (8 mL, 57.00 mmol), DME (24 mL) and H<sub>2</sub>O (12 mL), 2-bromo-3,3,3-trifluoropropene (0.83 mL, 8.00 mmol). The crude product was purified by flash column chromatography on silica gel (PE) to afford 0.81 g (41% yield) of **2c** as a white solid: <sup>1</sup>H NMR (400 MHz, CDCl<sub>3</sub>)

$\delta$ : 7.52 (d,  $J$  = 8.4 Hz, 2H), 7.32 (d,  $J$  = 8.6 Hz, 2H), 5.98 (s, 1H), 5.78 (s, 1H). All data are in accordance with the literature.<sup>2</sup>

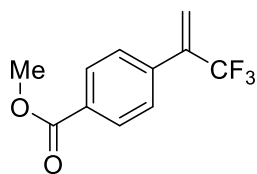

**Methyl 4-(3,3,3-trifluoroprop-1-en-2-yl)benzoate (2d) :**

According to Method A, the reaction was carried out with the corresponding arylboronic acid (2.16 g, 12.00 mmol), Pd(PPh<sub>3</sub>)<sub>2</sub>Cl<sub>2</sub> (285.7 mg, 0.41 mmol), TEA (8 mL, 57.00 mmol), DME (24 mL) and H<sub>2</sub>O (12 mL), 2-bromo-3,3,3-trifluoropropene (0.83 mL, 8.00 mmol). The crude product was purified by flash column chromatography on silica gel (PE: DCM=3:1) to afford 1.04 g (57% yield) of **2d** as a yellow oil: <sup>1</sup>H NMR (400 MHz, CDCl<sub>3</sub>)  $\delta$ : 8.05 (d,  $J$  = 8.3 Hz, 2H), 7.53 (d,  $J$  = 8.6 Hz, 2H), 6.05 (s, 1H), 5.87 (s, 1H), 3.94 (s, 1H). All data are in accordance with the literature.<sup>2</sup>

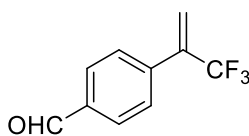

**4-(3,3,3-trifluoroprop-1-en-2-yl)benzaldehyde (2e) :**

According to Method A, the reaction was carried out with the corresponding arylboronic acid (1.82 g, 12.00 mmol), Pd(PPh<sub>3</sub>)<sub>2</sub>Cl<sub>2</sub> (285.7 mg, 0.41 mmol), TEA (8 mL, 57.00 mmol), DME (24 mL) and H<sub>2</sub>O (12 mL), 2-bromo-3,3,3-trifluoropropene (0.83 mL, 8.00 mmol). The crude product was purified by flash column chromatography on silica gel (PE) to afford 0.67 g (42% yield) of **2e** as a yellow oil: <sup>1</sup>H NMR (400 MHz, CDCl<sub>3</sub>)  $\delta$ : 10.05 (s, 1H), 7.92 (d,  $J$  = 8.4 Hz, 2H), 7.64 (d,  $J$  = 8.4 Hz, 1H), 6.09 (s, 1H), 5.90 (s, 1H). All data are in accordance with the literature.<sup>3</sup>

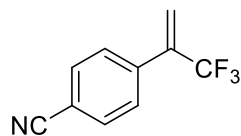

**3-(3,3,3-Trifluoroprop-1-en-2-yl)benzonitrile (2f) :**

According to Method A, the reaction was carried out with the corresponding arylboronic acid (1.76 g, 12.00 mmol), Pd(PPh<sub>3</sub>)<sub>2</sub>Cl<sub>2</sub> (285.7 mg, 0.41 mmol), TEA (8 mL, 57.00 mmol), DME (24 mL) and H<sub>2</sub>O (12 mL), 2-bromo-3,3,3-trifluoropropene (0.83 mL, 8.00 mmol). The crude product was purified by flash column chromatography on silica gel (PE: DCM=3:1) to afford 1.01 g (64% yield) of **2f** as an orange oil: <sup>1</sup>H NMR (400 MHz, CDCl<sub>3</sub>)  $\delta$ : 7.69 (d,  $J$  = 8.4 Hz, 2H), 7.57 (d,  $J$  = 7.4 Hz, 1H), 6.11(s, 1H), 5.88 (m, 1H). All data are in

accordance with the literature.<sup>2</sup>

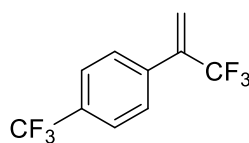

**1-(Trifluoromethyl)-4-(3,3,3-trifluoroprop-1-en-2-yl)benzene (2g)** : According to Method A, the reaction was carried out with the corresponding arylboronic acid (2.28 g, 12.00 mmol), Pd(PPh<sub>3</sub>)<sub>2</sub>Cl<sub>2</sub> (285.7 mg, 0.41 mmol), TEA (8 mL, 57.00 mmol), DME (24 mL) and H<sub>2</sub>O (12 mL), 2-bromo-3,3,3-trifluoropropene (0.83 mL, 8.00 mmol). The crude product was purified by flash column chromatography on silica gel (PE) to afford 0.49 g (26% yield) of **2g** as a yellow oil: <sup>1</sup>H NMR (400 MHz, CDCl<sub>3</sub>) δ: 7.66 (d, *J* = 8.2 Hz, 2H), 7.57 (d, *J* = 8.8 Hz, 2H), 6.07 (s, 1H), 5.85 (s, 1H). All data are in accordance with the literature.<sup>2</sup>

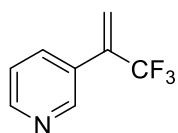

**3-(3,3,3-Trifluoroprop-1-en-2-yl)pyridine (2h)** : According to Method A, the reaction was carried out with the corresponding arylboronic acid (1.48 g, 12.00 mmol), Pd(PPh<sub>3</sub>)<sub>2</sub>Cl<sub>2</sub> (285.7 mg, 0.41 mmol), TEA (8 mL, 57.00 mmol), DME (24 mL) and H<sub>2</sub>O (12 mL), 2-bromo-3,3,3-trifluoropropene (0.83 mL, 8.00 mmol). The crude product was purified by flash column chromatography on silica gel (PE: DCM=5:1) to afford 0.82 g (59% yield) of **2h** as a brown oil: <sup>1</sup>H NMR (400 MHz, CDCl<sub>3</sub>) δ: 8.70 (s, 1H), 8.64 (d, *J* = 4.7 Hz, 1H), 7.78 (d, *J* = 8.7 Hz, 1H), 7.34 (t, *J* = 7.0 Hz, 1H), 6.07 (s, 1H), 5.85 (s, 1H). All data are in accordance with the literature.<sup>2</sup>

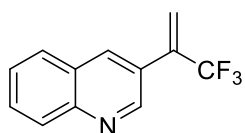

**3-(3,3,3-Trifluoroprop-1-en-2-yl)quinoline (2i)** : According to Method B, the reaction was carried out with the corresponding arylboronic acid (1.39 g, 8.00 mmol), Pd(PPh<sub>3</sub>)<sub>2</sub>Cl<sub>2</sub> (168.5 mg, 0.24 mmol), K<sub>2</sub>CO<sub>3</sub> (4.42 g, 32.00 mmol), THF (24 mL) and H<sub>2</sub>O (16 mL), 2-bromo-3,3,3-trifluoropropene (1.66 mL, 16.00 mmol). The crude product was purified by flash column chromatography on silica gel (PE: EA=10:1) to afford 1.03 g (58% yield) of **2i** as a yellow solid: <sup>1</sup>H NMR (400 MHz, CDCl<sub>3</sub>) δ: 8.99 (s, 1H), 8.25 (s, 1H), 8.13 (d, *J* = 8.6 Hz, 1H), 7.87 (d, *J* = 8.0 Hz, 1H), 7.77 (t, *J* = 7.0 Hz, 1H), 7.61 (t, *J* = 7.0 Hz, 1H), 6.17 (s, 1H), 6.00 (s, 1H). All data are in accordance with the

literature.<sup>2</sup>

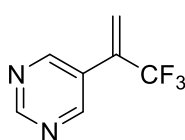

**5-(3,3,3-trifluoroprop-1-en-2-yl)pyrimidine (2j)** : According to Method A, the reaction was carried out with the corresponding arylboronic acid (1.82 g, 12.00 mmol), Pd(PPh<sub>3</sub>)<sub>2</sub>Cl<sub>2</sub> (285.7 mg, 0.41 mmol), TEA (8 mL, 57.00 mmol), DME (24 mL) and H<sub>2</sub>O (12 mL), 2-bromo-3,3,3-trifluoropropene (0.83 mL, 8.00 mmol). The crude product was purified by flash column chromatography on silica gel (PE) to afford 0.67 g (48% yield) of **2j** as a yellow oil: <sup>1</sup>H NMR (400 MHz, CDCl<sub>3</sub>) δ: 9.25 (s, 1H), 8.83 (s, 2H), 6.17 (s, 1H), 5.93 (s, 1H). All data are in accordance with the literature.<sup>3</sup>

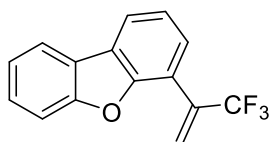

**4-(3,3,3-Trifluoroprop-1-en-2-yl)dibenzo[b,d]furan (2k)** : According to Method B, the reaction was carried out with the corresponding arylboronic acid (1.70 g, 8.00 mmol), Pd(PPh<sub>3</sub>)<sub>2</sub>Cl<sub>2</sub> (168.5 mg, 0.24 mmol), K<sub>2</sub>CO<sub>3</sub> (4.42 g, 32.00 mmol), THF (24 mL) and H<sub>2</sub>O (12 mL), 2-bromo-3,3,3-trifluoropropene (1.66 mL, 16.00 mmol). The crude product was purified by flash column chromatography on silica gel (PE) to afford 1.6 g (76% yield) of **2k** as a yellow oil: <sup>1</sup>H NMR (400 MHz, CDCl<sub>3</sub>) δ: 7.98 (d, *J* = 7.6 Hz, 2H), 7.60 (d, *J* = 8.3 Hz, 1H), 7.54-7.47 (m, 2H), 7.37 (t, *J* = 7.6 Hz, 2H), 6.37 (t, *J* = 1.25 Hz, 2H). All data are in accordance with the literature.<sup>2</sup>

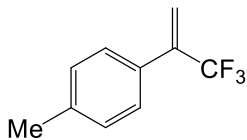

**Methyl-4-(3,3,3-trifluoroprop-1-en-2-yl)benzene (2l)** : According to Method A, the reaction was carried out with the corresponding arylboronic acid (1.63 g, 12.00 mmol), Pd(PPh<sub>3</sub>)<sub>2</sub>Cl<sub>2</sub> (285.7 mg, 0.41 mmol), TEA (8 mL, 57.00 mmol), DME (24 mL) and H<sub>2</sub>O (12 mL), 2-bromo-3,3,3-trifluoropropene (0.83 mL, 8.00 mmol). The crude product was purified by flash column chromatography on silica gel (PE) to afford 0.49 g (33% yield) of **2l** as a colorless oil: <sup>1</sup>H NMR (400 MHz, CDCl<sub>3</sub>) δ: 7.36 (d, *J* = 7.0 Hz, 2H), 7.20 (d, *J* = 6.5 Hz, 2H), 5.91 (s, 1H), 5.74 (s, 1H), 2.38 (s, 3H). All data are in accordance with the literature.<sup>2</sup>

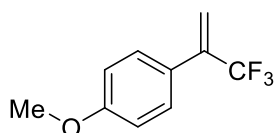

**Methoxy-4-(3,3,3-trifluoroprop-1-en-2-yl)benzene (2m) :**

According to Method A, the reaction was carried out with the corresponding arylboronic acid (1.82 g, 12.00 mmol), Pd(PPh<sub>3</sub>)<sub>2</sub>Cl<sub>2</sub> (285.7 mg, 0.41 mmol), TEA (8 mL, 57.00 mmol), DME (24 mL) and H<sub>2</sub>O (12 mL), 2-bromo-3,3,3-trifluoropropene (0.83 mL, 8.00 mmol). The crude product was purified by flash column chromatography on silica gel (PE) to afford 0.67 g (41% yield) of **1c** as a yellow oil: <sup>1</sup>H NMR (400 MHz, CDCl<sub>3</sub>) δ: 7.40 (d, *J* = 9.0 Hz, 2H), 6.91 (d, *J* = 8.5 Hz, 2H), 5.87 (s, 1H), 5.70 (s, 1H), 3.83 (s, 3H). All data are in accordance with the literature.<sup>2</sup>

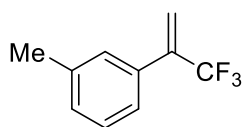

**1-methyl-3-(3,3,3-trifluoroprop-1-en-2-yl)benzene (2n) :**

According to Method B, the reaction was carried out with the corresponding arylboronic acid (816 mg, 6.00 mmol), Pd(PPh<sub>3</sub>)<sub>2</sub>Cl<sub>2</sub> (126.0 mg, 0.18 mmol), K<sub>2</sub>CO<sub>3</sub> (3.32 g, 24.00 mmol), THF (18 mL) and H<sub>2</sub>O (12 mL), 2-bromo-3,3,3-trifluoropropene (1.25 mL, 12.00 mmol). The crude product was purified by flash column chromatography on silica gel (PE) to afford 850 mg (76% yield) of **2n** as a colorless oil: <sup>1</sup>H NMR (400 MHz, CDCl<sub>3</sub>) δ: 7.30-7.24 (m, 3H), 7.20 (d, *J* = 6.7 Hz, 1H), 5.94 (s, 1H), 5.75 (s, 1H), 2.38 (s, 3H). All data are in accordance with the literature.<sup>4</sup>

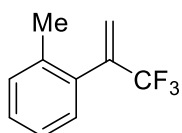

**1-methyl-2-(3,3,3-trifluoroprop-1-en-2-yl)benzene (2o):**

According to Method B, the reaction was carried out with the corresponding arylboronic acid (816 mg, 6.00 mmol), Pd(PPh<sub>3</sub>)<sub>2</sub>Cl<sub>2</sub> (126.0 mg, 0.18 mmol), K<sub>2</sub>CO<sub>3</sub> (3.32 g, 24.00 mmol), THF (18 mL) and H<sub>2</sub>O (12 mL), 2-bromo-3,3,3-trifluoropropene (1.25 mL, 12.00 mmol). The crude product was purified by flash column chromatography on silica gel (PE) to afford 582 mg (52% yield) of **2o** as a colorless oil: <sup>1</sup>H NMR (400 MHz, CDCl<sub>3</sub>) δ: 7.30-7.24 (m, 2H), 7.20 (d, *J* = 3.1 Hz, 2H), 6.11 (s, 1H), 5.49 (s, 1H), 2.30 (s, 3H). All data are in accordance with the literature.<sup>5</sup>



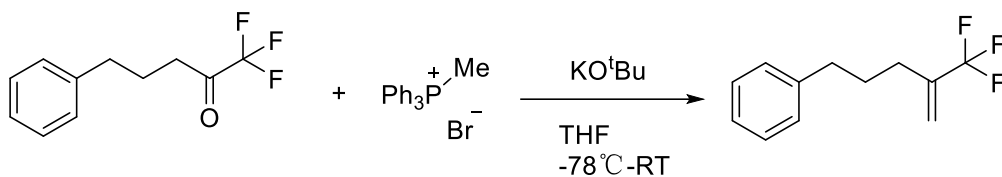

**(4-(trifluoromethyl)pent-4-en-1-yl)benzene (2p)**: In a N<sub>2</sub>-filled glovebox, 100 mL round-bottom flask equipped with a magnetic stir bar was charged sequentially with 1,1,1-trifluoro-5-phenyl-2-pentanone (1.30 g, 6.0 mmol, 1.0 equiv.) and **dry THF** (20 mL). Then the mixture was cooled to -78 °C, and dropwise added (4 mL) tetrahydrofuran-dissolved methyltriphenylphosphonium bromide (2.57 g, 7.2 mmol, 1.2 equiv.). The reaction mixture was stirred at room temperature for 1.5 hours. The resultant mixture was treated with NH<sub>4</sub>Cl (20 mL). After extraction with methylene chloride, the combined organic phases were dried over anhydrous Na<sub>2</sub>SO<sub>4</sub>, filtered, and concentrated under reduced pressure. The mixture was purified by flash column chromatography on silica gel (PE) to afford 878 mg (68% yield) of **2p** as a colorless oil: <sup>1</sup>H NMR (400 MHz, CDCl<sub>3</sub>) δ: 7.33-7.26 (m, 2H), 7.22-7.16 (m, 3H), 5.68 (s, 1H), 5.32 (s, 1H), 2.67 (t, *J* = 7.8 Hz, 2H), 2.25 (t, *J* = 7.8 Hz, 2H), 1.90-1.82 (m, 2H). All data are in accordance with the literature.<sup>6</sup>

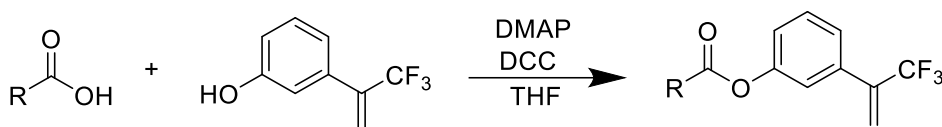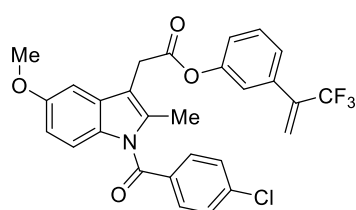

**3-(3,3,3-Trifluoroprop-1-en-2-yl)phenyl 2-(1-(4-chlorobenzoyl)-5-methoxy-2-methyl-1H-indol-3-yl)acetate (2q)**: To a solution of carboxylic acid (3.26 g, 9.10 mmol, 1.0 equiv.), 4-dimethylaminopyridine (DMAP) (111.2 mg, 0.90 mmol, 0.1 equiv.) and 3-(3,3,3-Trifluoroprop-1-en-2-yl)phenol (1.88 g, 10.00 mmol, 1.1 equiv.) in DMF (22.75 mL), *N,N*-dicyclohexylcarbodiimide (DCC) (2.06 g, 10.00 mmol, 1.1 equiv.) was added. The reaction mixture was stirred at room temperature for 5 hours (TLC tracking detection). The mixture was purified by flash column chromatography on silica gel (PE: DCM=1:5) to afford 3.2 g (67% yield) of **2q** as a yellow oil: <sup>1</sup>H NMR (400 MHz, CDCl<sub>3</sub>) δ: 7.68 (d, *J* = 8.4 Hz, 2H), 7.48 (d, *J* = 8.5 Hz, 2H), 7.40-7.30 (m, 2H),

7.20 (s, 1H), 7.14-7.11 (m, 1H), 7.09 (d,  $J = 2.5$  Hz, 1H), 6.93 (d,  $J = 9.0$  Hz, 1H), 6.73 (dd,  $J = 9.0$  Hz,  $J = 2.5$  Hz, 1H), 5.99 (s, 1H), 5.79 (s, 1H), 3.94 (s, 2H), 3.85 (s, 3H), 2.47 (s, 3H). All data are in accordance with the literature.<sup>2</sup>

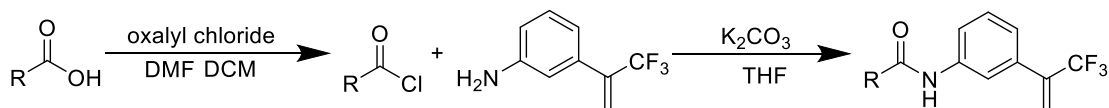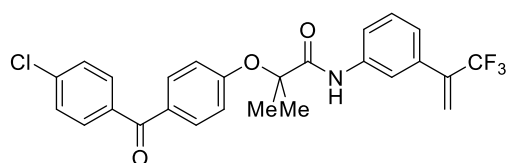

**2-(4-(4-Chlorobenzoyl)phenoxy)-2-methyl  
-N-(3-(3,3,3-trifluoroprop-1-en-2-yl)phenyl)  
propanamide (2r)** :

To a mixture of Fenofibric acid (1.09 g, 3.00 mmol, 1.0 equiv.) and oxalylchloride (0.51 mL, 6.00 mmol, 2.0 equiv.) in dry CH<sub>2</sub>Cl<sub>2</sub> (12 mL) was added dropwise DMF (23.4  $\mu$ L, 0.30 mmol, 0.1 equiv.). The reaction mixture was stirred at room temperature for 6 hours. Removal of the solvent in vacuo afforded the desired acid chloride which was used in the next step without further purification. To a mixture of 3-(3,3,3-trifluoroprop-1-en-2-yl)aniline (0.57 g, 3.00 mmol, 1.0 equiv.) and K<sub>2</sub>CO<sub>3</sub> (0.42 g, 3.00 mmol, 1.0 equiv.) in dry THF (6 mL) was added dropwise a solution of the freshly prepared acid chloride (3.00 mmol, 1.0 equiv.) in dry THF (6 mL). This mixture was stirred at room temperature for 6 hours before water was added to quench the reaction. The resultant mixture was extracted with EtOAc (3\*20 mL). The combined organic phases were dried over anhydrous Na<sub>2</sub>SO<sub>4</sub>, filtered, and concentrated under reduced pressure. The resultant crude product was purified by column chromatography on silica gel (PE: EA=10:1) to give the desired trifluoromethyl alkene as a white solid 1.10 g (75% yield). <sup>1</sup>H NMR (400 MHz, CDCl<sub>3</sub>)  $\delta$ : 8.41 (s, 1H), 7.77 (d,  $J = 8.8$  Hz, 2H), 7.72-7.70 (m, 3H), 7.59-7.56 (m, 1H), 7.45 (d,  $J = 8.6$  Hz, 2H), 7.35 (t,  $J = 8.0$  Hz, 1H), 7.24-7.22 (m, 1H), 7.05 (d,  $J = 8.8$  Hz, 2H), 5.97 (s, 1H), 5.80 (s, 1H), 1.68 (s, 6H). All data are in accordance with the literature.<sup>2</sup>

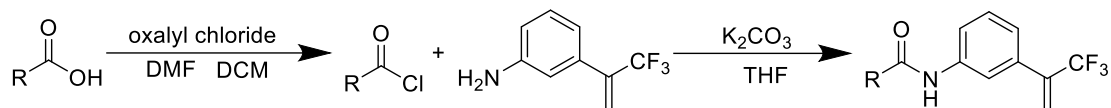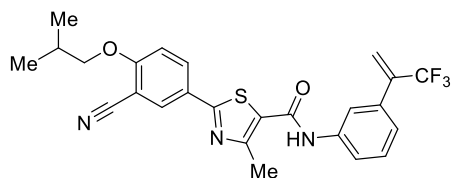

**2-(3-Cyano-4-isobutoxyphenyl)-4-methyl-N-(3-(3,3,3-trifluoroprop-1-en-2-yl)phenyl)thiazole-5-carboxamide (2s)** :

To a mixture of Febuxostat (0.95 g, 3.00 mmol, 1.0 equiv.) and oxalylchloride (0.51 mL, 6.00 mmol, 2.0 equiv.) in dry  $\text{CH}_2\text{Cl}_2$  (12 mL) was added dropwise DMF (23.4  $\mu\text{L}$ , 0.30 mmol, 0.1 equiv.). The reaction mixture was stirred at room temperature for 6 hours. Removal of the solvent in vacuo afforded the desired acid chloride which was used in the next step without further purification. To a mixture of 3-(3,3,3-trifluoroprop-1-en-2-yl)aniline (0.57 g, 3.00 mmol, 1.0 equiv.) and  $\text{K}_2\text{CO}_3$  (0.42 g, 3.00 mmol, 1.0 equiv.) in dry THF (6 mL) was added dropwise a solution of the freshly prepared acid chloride (3.00 mmol, 1.0 equiv.) in dry THF (6 mL). This mixture was stirred at room temperature for 6 hours before water was added to quench the reaction. The resultant mixture was extracted with EtOAc (3\*20 mL). The combined organic phases were dried over anhydrous  $\text{Na}_2\text{SO}_4$ , filtered, and concentrated under reduced pressure. The resultant crude product was purified by column chromatography on silica gel (PE: EA=5:1) to give the desired trifluoromethyl alkene as a white solid 1.09 g (75% yield).  $^1\text{H NMR}$  (400 MHz,  $\text{CDCl}_3$ )  $\delta$ : 8.16 (d,  $J = 2.2$  Hz, 1H), 8.08 (dd,  $J = 8.9$  Hz,  $J = 2.3$  Hz, 1H), 7.67-7.62 (m, 2H), 7.54 (s, 1H), 7.40 (t,  $J = 7.9$  Hz, 1H), 7.02 (d,  $J = 8.9$  Hz, 1H), 6.01-6.00 (m, 1H), 5.84-5.82 (m, 1H), 3.91 (d,  $J = 6.5$  Hz, 2H), 2.80 (s, 3H), 2.24-2.17 (m, 1H), 1.09 (d,  $J = 6.7$  Hz, 6H). All data are in accordance with the literature.<sup>2</sup>

## 5. General Procedure for Deoxygenative Difluoroallylation of Xanthate Salts

### Method C:

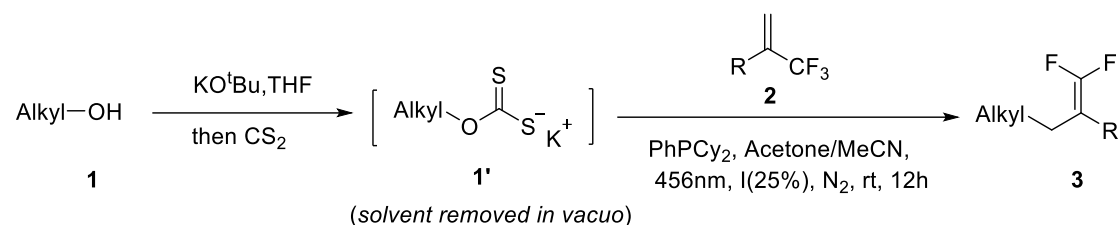

In a N<sub>2</sub>-filled glovebox, an oven-dried 20 mL glass vial equipped with a magnetic stir bar was charged sequentially with alcohol **1** (1.0 eq), **KO<sup>t</sup>Bu** (1.1 eq), and **dry THF** (0.1 M). After being sealed with a septum cap and transferred out of the glovebox, the reaction mixture was stirred at room temperature for 30 minutes, followed by the addition of **CS<sub>2</sub>** (3.0 eq) via microsyringe at 0°C and continued to be stirred for 3 hours at 0°C before removing the solvent in vacuo. The system was transferred into the glovebox, then **2** (1.2 eq), **PhPCy<sub>2</sub>** (1.2 eq), and the mixed solvents of **Acetone/MeCN** (9/1, 0.05 M) were added. The vial was sealed with a septum cap and transferred out of the glovebox. The reaction mixture was stirred at room temperature under blue LEDs (456 nm, the light intensity is 25%) irradiation for 12 h. The solvent was removed in vacuo and the residue was purified by column chromatography to afford the product and chemoselectivity were determined from analysis of the reaction mixture by either <sup>19</sup>F NMR.

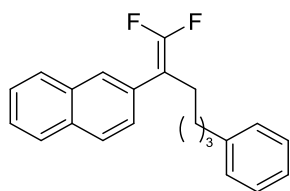

### 2-(1,1-difluoro-6-phenylhex-1-en-2-yl)naphthalene (**3a**) :

According to Method C, the reaction was carried out with alcohol **1a** (40.9 mg, 0.3 mmol), **KO<sup>t</sup>Bu** (37.0 mg, 0.33 mmol), **dry THF** (3.0 mL), **CS<sub>2</sub>** (54.1 μL, 0.9 mmol), and then trifluoromethyl alkene **2a** (80.0 mg, 0.36 mmol), **PhPCy<sub>2</sub>** (98.8 mg, 0.36 mmol), **Acetone/MeCN** (5.4 mL/0.6 mL). The crude product was purified by flash column chromatography on silica gel (PE) to afford 83 mg (86% yield) of **3a** as a yellow oil: <sup>1</sup>H NMR (400 MHz, CDCl<sub>3</sub>) δ: 7.87-7.79 (m, 4H), 7.54-7.45 (m, 3H), 7.29 (t, *J* = 7.2

Hz, 2H), 7.20 (dd,  $J = 7.7$  Hz, 7.0 Hz, 3H), 2.63-2.56 (m, 4H), 1.74-1.66 (m, 2H), 1.53-1.46 (m, 2H);  $^{13}\text{C}$  NMR (100 MHz,  $\text{CDCl}_3$ )  $\delta$ : 153.8 (dd,  $J = 288.9$  Hz, 285.1 Hz), 142.3, 133.2, 132.4, 131.1 (t,  $J = 3.8$  Hz), 128.3, 128.2, 128.0, 127.9, 127.6, 127.3 (t,  $J = 3.8$  Hz), 126.2, 126.1 (t,  $J = 3.8$  Hz), 126.0, 125.7, 92.4 (dd,  $J = 21.6$  Hz, 12.9 Hz), 35.5, 30.7, 27.4, 27.2;  $^{19}\text{F}$  NMR (376 MHz,  $\text{CDCl}_3$ )  $\delta$ : -91.01 (d,  $J = 43.4$  Hz), -91.40 (d,  $J = 43.3$  Hz); HRMS  $m/z$  (ESI) calcd for  $\text{C}_{22}\text{H}_{20}\text{F}_2$  ( $\text{M}+\text{Na}$ ) $^+$  345.1431, found 345.1434.

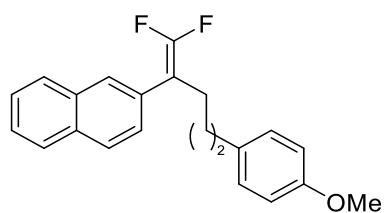

**2-(1,1-difluoro-5-(4-methoxyphenyl)pent-1-en-2-yl)naphthalene (3b)** : According to Method C, the reaction was carried out with alcohol **1b** (45.7 mg, 0.3 mmol), **KO<sup>t</sup>Bu** (37.0 mg, 0.33 mmol), **dry THF**

(3.0 mL), **CS<sub>2</sub>** (54.1  $\mu\text{L}$ , 0.9 mmol), and then trifluoromethyl alkene **2a** (80.0 mg, 0.36 mmol), **PhPCy<sub>2</sub>** (98.8 mg, 0.36 mmol), **Acetone/MeCN** (5.4 mL/0.6 mL). The crude product was purified by flash column chromatography on silica gel (PE) to afford 71 mg (70% yield) of **3b** as a colorless oil:  $^1\text{H}$  NMR (400 MHz,  $\text{CDCl}_3$ )  $\delta$ : 7.85-7.81 (m, 3H), 7.74 (s, 1H), 7.52-7.43 (m, 3H), 7.06 (d,  $J = 8.7$  Hz, 2H), 6.83 (d,  $J = 8.7$  Hz, 2H), 3.79 (s, 3H), 2.62-2.53 (m, 4H), 1.76-1.68 (m, 2H);  $^{13}\text{C}$  NMR (100 MHz,  $\text{CDCl}_3$ )  $\delta$ : 167.7, 153.8 (dd,  $J = 289.4$  Hz, 285.6 Hz), 133.8, 133.2, 132.4, 131.0 (t,  $J = 3.4$  Hz), 129.2, 128.0, 127.9, 127.6, 127.2 (t,  $J = 3.4$  Hz), 126.2, 126.1, 126.1, 113.7, 92.3 (dd,  $J = 21.6$  Hz, 12.9 Hz), 55.2, 34.2, 29.6, 27.1;  $^{19}\text{F}$  NMR (376 MHz,  $\text{CDCl}_3$ )  $\delta$ : -90.86 (d,  $J = 41.9$  Hz), -91.19 (d,  $J = 41.9$  Hz). All data are in accordance with the literature.<sup>2</sup>

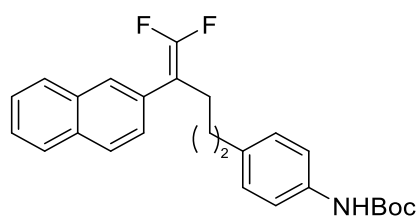

**Tert-butyl (4-(5,5-difluoro-4-(naphthalen-2-yl)pent-4-en-1-yl)phenyl)carbamate (3c)** : According to Method C, the reaction was carried out with alcohol **1c** (71.2 mg, 0.3 mmol), **KO<sup>t</sup>Bu** (37.0 mg, 0.33 mmol), **dry THF** (3.0 mL), **CS<sub>2</sub>**

(54.1  $\mu\text{L}$ , 0.9 mmol), and then trifluoromethyl alkene **2a** (80 mg, 0.36 mmol), **PhPCy<sub>2</sub>** (98.8 mg, 0.36 mmol), **Acetone/MeCN** (5.4 mL/0.6 mL). The crude product was purified by flash column chromatography on silica gel (PE:EA = 20:1) to afford

108 mg (82% yield) of **3c** as a white solid:  $^1\text{H NMR}$  (400 MHz,  $\text{CDCl}_3$ )  $\delta$ : 7.84-7.72 (m, 4H), 7.52-7.47 (m, 2H), 7.43 (d,  $J = 8.6$  Hz, 1H), 7.25 (d,  $J = 8.4$  Hz, 2H), 7.05 (d,  $J = 8.6$  Hz, 2H), 6.45 (s, 1H), 2.61-2.51 (m, 4H), 1.74-1.66 (m, 2H), 1.53 (s, 3H);  $^{13}\text{C NMR}$  (100 MHz,  $\text{CDCl}_3$ )  $\delta$ : 153.7 (dd,  $J = 288.9$  Hz, 285.6 Hz), 152.8, 136.4, 136.1, 133.2, 132.4, 130.9 (t,  $J = 3.4$  Hz), 128.8, 128.0, 127.9, 127.5, 127.2 (t,  $J = 3.4$  Hz), 126.2, 126.1, 118.6, 92.3 (dd,  $J = 21.6$  Hz, 13.0 Hz), 80.3, 34.4, 29.4, 28.3, 27.1;  $^{19}\text{F NMR}$  (376 MHz,  $\text{CDCl}_3$ )  $\delta$ : -90.85 (d,  $J = 43.3$  Hz), -91.1 (d,  $J = 43.3$  Hz); **HRMS**  $m/z$  (ESI) calcd for  $\text{C}_{26}\text{H}_{27}\text{F}_2\text{NO}_2$  ( $\text{M}+\text{Na}$ ) $^+$  446.1908, found 446.1909.

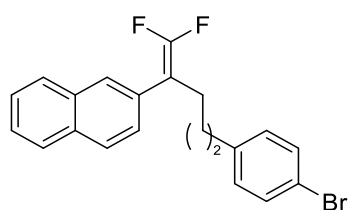

**(5-(4-bromophenyl)-1,1-difluoropent-1-en-2-yl)naphthalene (3d)** : According to Method C, the reaction was carried out with alcohol **1d** (60.3 mg, 0.3 mmol), **KO<sup>t</sup>Bu** (37.0 mg, 0.33 mmol), **dry THF** (3.0 mL), **CS<sub>2</sub>** (54.1  $\mu\text{L}$ , 0.9 mmol), and then trifluoromethyl alkene **2a** (80.0 mg, 0.36 mmol), **PhPCy<sub>2</sub>** (98.8 mg, 0.36 mmol), **Acetone/MeCN** (5.4 mL/0.6 mL). The crude product was purified by flash column chromatography on silica gel (PE) to afford 83 mg (72% yield) of **3d** as a white solid:  $^1\text{H NMR}$  (400 MHz,  $\text{CDCl}_3$ )  $\delta$ : 7.85-7.80 (m, 3H), 7.71 (s, 1H), 7.52-7.49 (m, 2H), 7.41 (dd,  $J = 8.6$  Hz, 8.5 Hz, 3H), 6.99 (d,  $J = 8.4$  Hz, 2H), 2.61-2.52 (m, 4H), 1.75-1.67 (m, 2H);  $^{13}\text{C NMR}$  (100 MHz,  $\text{CDCl}_3$ )  $\delta$ : 153.8 (dd,  $J = 288.9$  Hz, 285.6 Hz), 140.7, 133.2, 132.4, 131.3, 130.8 (t,  $J = 3.8$  Hz), 130.1, 128.1, 127.9, 127.6, 127.2 (d,  $J = 3.4$  Hz), 126.3, 126.2, 126.0 (d,  $J = 2.9$  Hz), 119.5, 92.2 (dd,  $J = 21.6$  Hz, 13.4 Hz), 34.5, 29.1, 27.1;  $^{19}\text{F NMR}$  (376 MHz,  $\text{CDCl}_3$ )  $\delta$ : -90.75 (d,  $J = 41.9$  Hz), -91.02 (d,  $J = 43.4$  Hz). All data are in accordance with the literature.<sup>2</sup>

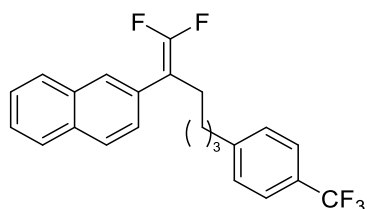

**2-(1,1-difluoro-6-(4-(trifluoromethyl)phenyl)hex-1-en-2-yl)naphthalene (3e)** : According to Method C, the reaction was carried out with alcohol **1e** (38.4 mg, 0.3 mmol), **KO<sup>t</sup>Bu** (37.0 mg, 0.33 mmol), **dry THF** (3.0 mL), **CS<sub>2</sub>** (54.1  $\mu\text{L}$ , 0.9 mmol), and then trifluoromethyl alkene **2a** (80.0 mg, 0.36 mmol), **PhPCy<sub>2</sub>** (98.8 mg, 0.36 mmol), **Acetone/MeCN** (5.4 mL/0.6 mL). The crude product was purified by flash column chromatography on silica gel (PE) to afford 83 mg (71% yield) of **3e** as a colorless oil:

**<sup>1</sup>H NMR (400 MHz, CDCl<sub>3</sub>)** δ: 7.86-7.75 (m, 4H), 7.53-7.41 (m, 5H), 7.22 (d, *J* = 8.2 Hz, 2H), 2.64-2.53 (m, 4H), 1.70-1.63 (m, 2H), 1.49-1.41 (m, 2H); **<sup>13</sup>C NMR (100 MHz, CDCl<sub>3</sub>)** δ: 153.8 (dd, *J* = 288.9 Hz, 285.6 Hz), 146.4, 133.2, 132.4, 130.9, 128.6, 127.9 (dt, *J* = 32.1 Hz, 25.4 Hz), 127.3 (d, *J* = 3.4 Hz), 126.3, 126.2, 126.1 (t, *J* = 3.4 Hz), 125.7 (d, *J* = 270.7 Hz), 125.2 (q, *J* = 3.4 Hz), 92.2 (dd, *J* = 21.1 Hz, 13.9 Hz), 35.3, 30.3, 27.3, 27.1; **<sup>19</sup>F NMR (376 MHz, CDCl<sub>3</sub>)** δ: -62.13, -91.11 (d, *J* = 43.3 Hz), -91.30 (d, *J* = 43.3 Hz); **HRMS m/z (ESI)** calcd for C<sub>23</sub>H<sub>19</sub>F<sub>5</sub> (M+H)<sup>+</sup> 391.1485, found 391.1481.

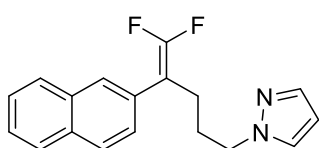

**1-(5,5-difluoro-4-(naphthalen-2-yl)pent-4-en-1-yl)-1H-pyrazole (3f)**

: According to Method C, the reaction was carried out with alcohol **1f** (33.6 mg, 0.3 mmol), **KO<sup>t</sup>Bu** (37.0 mg, 0.33 mmol), **dry THF** (3.0 mL), **CS<sub>2</sub>** (54.1 μL, 0.9 mmol), and then trifluoromethyl alkene **2a** (80.0 mg, 0.36 mmol), **PhPCy<sub>2</sub>** (98.8 mg, 0.36 mmol), **Acetone/MeCN** (5.4 mL/0.6 mL). The crude product was purified by flash column chromatography on silica gel (PE:EA = 10:1) to afford 31 mg (35% yield) of **3f** as a yellow oil: **<sup>1</sup>H NMR (400 MHz, CDCl<sub>3</sub>)** δ: 7.84-7.79 (m, 3H), 7.71 (s, 1H), 7.51-7.48 (m, 3H), 7.41 (m, 1H), 7.30 (d, *J* = 2.2 Hz, 1H), 4.13 (t, *J* = 7.0 Hz, 2H), 2.54-2.49 (m, 2H), 2.03-1.95 (m, 2H); **<sup>13</sup>C NMR (100 MHz, CDCl<sub>3</sub>)** δ: 153.8 (dd, *J* = 289.4 Hz, 286.1 Hz), 139.3, 133.2, 132.5, 130.4 (t, *J* = 3.4 Hz), 129.0, 128.2, 127.9, 127.6, 127.2 (t, *J* = 3.8 Hz), 126.4, 126.2, 125.9 (t, *J* = 3.4 Hz), 105.3, 91.5 (dd, *J* = 21.6 Hz, 13.4 Hz), 51.1, 28.5, 24.7; **<sup>19</sup>F NMR (376 MHz, CDCl<sub>3</sub>)** δ: -90.03 (d, *J* = 41.9 Hz), -90.34 (d, *J* = 41.9 Hz); **HRMS m/z (ESI)** calcd for C<sub>18</sub>H<sub>16</sub>F<sub>2</sub>N<sub>2</sub> (M+H)<sup>+</sup> 299.1360, found 299.1359.

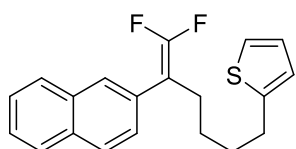

**2-(6,6-difluoro-5-(naphthalen-2-yl)hex-5-en-1-yl)thiophene (3g)**

: According to Method C, the reaction was carried out with alcohol **1g** (38.5 mg, 0.3 mmol), **KO<sup>t</sup>Bu** (37.0 mg, 0.33 mmol), **dry THF** (3.0 mL), **CS<sub>2</sub>** (54.1 μL, 0.9 mmol), and then trifluoromethyl alkene **2a** (80.0 mg, 0.36 mmol), **PhPCy<sub>2</sub>** (98.8 mg, 0.36 mmol), **Acetone/MeCN** (5.4 mL/0.6 mL). The crude product was purified by flash column chromatography on silica gel (PE:EA = 10:1) to afford 41 mg (41% yield) of **3g** as a

colorless oil:  $^1\text{H NMR}$  (400 MHz,  $\text{CDCl}_3$ )  $\delta$ : 7.85-7.76 (m, 4H), 7.50 (td,  $J = 3.6$  Hz, 8.7 Hz, 3H), 7.10 (d,  $J = 5.2$  Hz, 1H), 6.89 (t,  $J = 5.2$  Hz, 1H), 6.74 (d,  $J = 3.7$  Hz, 1H), 2.80 (t,  $J = 7.6$  Hz, 2H), 2.57-2.53 (m, 2H), 1.76-1.69 (m, 2H), 1.53-1.45 (m, 2H);  $^{13}\text{C NMR}$  (100 MHz,  $\text{CDCl}_3$ )  $\delta$ : 153.8 (dd,  $J = 288.9$  Hz, 285.6 Hz), 145.2, 133.2, 132.4, 131.0(t,  $J = 3.8$  Hz), 128.0, 127.9, 127.6, 127.3 (t,  $J = 3.4$  Hz), 126.6, 126.2, 126.1, 124.0, 122.9, 92.3 (dd,  $J = 21.6$  Hz, 13.4 Hz), 31.0, 29.5, 27.3, 27.1;  $^{19}\text{F NMR}$  (376 MHz,  $\text{CDCl}_3$ )  $\delta$ : -91.05 (d,  $J = 43.3$  Hz), -91.32 (d,  $J = 43.3$  Hz); **HRMS**  $m/z$  (ESI) calcd for  $\text{C}_{20}\text{H}_{18}\text{F}_2\text{S}$  ( $\text{M}+\text{H}$ ) $^+$  329.1176, found 329.1174.

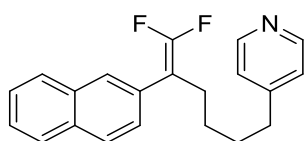

**4-(6,6-difluoro-5-(naphthalen-2-yl)hex-5-en-1-yl)pyridine (3h)**

: According to Method C, the reaction was carried out with alcohol **1h** (41.2 mg, 0.3 mmol), **KO<sup>t</sup>Bu** (37.0 mg, 0.33 mmol), **dry THF** (3.0 mL), **CS<sub>2</sub>** (54.1  $\mu\text{L}$ , 0.9 mmol), and then trifluoromethyl alkene **2a** (80.0 mg, 0.36 mmol), **PhPCy<sub>2</sub>** (98.8 mg, 0.36 mmol), **Acetone/MeCN** (5.4 mL/0.6 mL). The crude product was purified by flash column chromatography on silica gel (PE:EA = 5:1) to afford 50 mg (52% yield) of **3h** as a yellow oil:  $^1\text{H NMR}$  (400 MHz,  $\text{CDCl}_3$ )  $\delta$ : 7.44 (d,  $J = 6.2$  Hz, 2H), 7.84-7.74 (m, 4H), 7.51-7.40 (m, 3H), 7.03 (d,  $J = 6.3$  Hz, 2H), 2.57-2.51 (m, 4H), 1.69-1.61 (m, 2H), 1.48-1.40 (m, 2H);  $^{13}\text{C NMR}$  (100 MHz,  $\text{CDCl}_3$ )  $\delta$ : 153.8 (dd,  $J = 288.9$  Hz, 285.6 Hz), 151.1, 149.6, 133.2, 132.4, 130.8, 128.1, 127.8, 127.6, 127.3 (t,  $J = 3.4$  Hz), 126.3, 126.2, 126.0 (t,  $J = 2.9$  Hz), 123.8, 92.1 (dd,  $J = 21.1$  Hz, 13.4 Hz), 34.7, 29.4, 27.3, 27.0;  $^{19}\text{F NMR}$  (376 MHz,  $\text{CDCl}_3$ )  $\delta$ : -91.04 (d,  $J = 43.3$  Hz), -91.23 (d,  $J = 43.3$  Hz); **HRMS**  $m/z$  (ESI) calcd for  $\text{C}_{21}\text{H}_{19}\text{F}_2\text{N}$  ( $\text{M}+\text{H}$ ) $^+$  324.1564, found 324.1562.

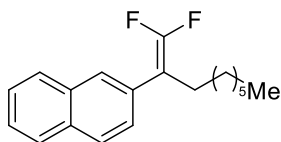

**2-(1,1-difluoronon-1-en-2-yl)naphthalene (3i)**

: According to Method C, the reaction was carried out with alcohol **1i** (30.7 mg, 0.3 mmol), **KO<sup>t</sup>Bu** (37.0 mg, 0.33 mmol), **dry THF** (3.0 mL), **CS<sub>2</sub>** (54.1  $\mu\text{L}$ , 0.9 mmol), and then trifluoromethyl alkene **2a** (80.0 mg, 0.36 mmol), **PhPCy<sub>2</sub>** (98.8 mg, 0.36 mmol), **Acetone/MeCN** (5.4 mL/0.6 mL). The crude product was purified by flash column chromatography on silica gel (PE) to afford 71 mg (80% yield) of **3i** as a colorless oil:  $^1\text{H NMR}$  (400 MHz,  $\text{CDCl}_3$ )  $\delta$ : 7.86-7.79 (m, 4H), 7.51-7.45 (m, 3H), 2.54-2.49 (m, 2H), 1.43-1.25 (m, 10H), 0.88 (t,



$J = 7.1$  Hz, 3H);  $^{13}\text{C}$  NMR (100 MHz,  $\text{CDCl}_3$ )  $\delta$ : 153.8 (dd,  $J = 288.9$  Hz, 285.1 Hz), 133.3, 132.4, 131.3 (t,  $J = 3.4$  Hz), 128.0, 127.9, 127.6, 127.3 (t,  $J = 3.4$  Hz), 126.2, 126.0, 92.6 (dd,  $J = 21.6$  Hz, 12.9 Hz), 31.8, 29.0, 28.9, 27.8, 27.7, 22.6, 14.0;  $^{19}\text{F}$  NMR (376 MHz,  $\text{CDCl}_3$ )  $\delta$ : -91.4 (d,  $J = 44.8$  Hz), -91.71 (d,  $J = 44.8$  Hz). All data are in accordance with the literature.<sup>2</sup>

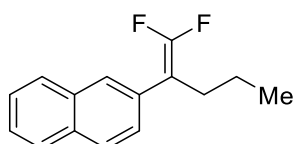

**2-(1,1-difluoropent-1-en-2-yl)naphthalene (3j)** : According to Method C, the reaction was carried out with alcohol **1j** (13.8 mg, 0.3 mmol), **KO<sup>t</sup>Bu** (37.0 mg, 0.33 mmol), **dry THF** (3.0 mL), **CS<sub>2</sub>** (54.1  $\mu\text{L}$ , 0.9 mmol), and then trifluoromethyl alkene **2a** (80.0 mg, 0.36 mmol), **PhPCy<sub>2</sub>** (98.8 mg, 0.36 mmol), **Acetone/MeCN** (5.4 mL/0.6 mL). The crude product was purified by flash column chromatography on silica gel (PE) to afford 56 mg (80% yield) of **3j** as a colorless oil:  $^1\text{H}$  NMR (400 MHz,  $\text{CDCl}_3$ )  $\delta$ : 7.85-7.78 (m, 4H), 7.52-7.44 (m, 3H), 2.52-2.47 (m, 2H), 1.49-1.39 (m, 2H), 0.93 (t,  $J = 7.4$  Hz, 3H);  $^{13}\text{C}$  NMR (100 MHz,  $\text{CDCl}_3$ )  $\delta$ : 153.9 (dd,  $J = 288.5$  Hz, 285.6 Hz), 133.2, 132.4, 131.3 (t,  $J = 3.4$  Hz), 128.0, 127.9, 127.6, 127.3 (t,  $J = 3.4$  Hz), 126.2, 126.0, 92.3 (dd,  $J = 21.6$  Hz, 12.9 Hz), 29.6, 20.9, 13.4;  $^{19}\text{F}$  NMR (376 MHz,  $\text{CDCl}_3$ )  $\delta$ : -91.39 (d,  $J = 44.8$  Hz), -91.61 (d,  $J = 44.8$  Hz); HRMS  $m/z$  (ESI) calcd for  $\text{C}_{15}\text{H}_{14}\text{F}_2$  ( $\text{M}+\text{H}$ )<sup>+</sup> 233.1142, found 233.1144.

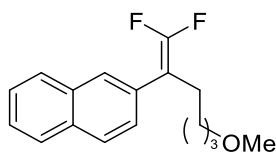

**2-(1,1-difluoro-6-methoxyhex-1-en-2-yl)naphthalene (3k)** : According to Method C, the reaction was carried out with alcohol **1k** (45.7 mg, 0.3 mmol), **KO<sup>t</sup>Bu** (37.0 mg, 0.33 mmol), **dry THF** (3.0 mL), **CS<sub>2</sub>** (54.1  $\mu\text{L}$ , 0.9 mmol), and then trifluoromethyl alkene **2a** (80.0 mg, 0.36 mmol), **PhPCy<sub>2</sub>** (98.8 mg, 0.36 mmol), **Acetone/MeCN** (5.4 mL/0.6 mL). The crude product was purified by flash column chromatography on silica gel (PE:DCM = 10:1) to afford 58 mg (70% yield) of **3k** as a colorless oil:  $^1\text{H}$  NMR (400 MHz,  $\text{CDCl}_3$ )  $\delta$ : 7.85-7.79 (m, 4H), 7.51-7.44 (m, 3H), 3.34 (ts,  $J = 6.6$  Hz, 5H), 2.58-2.53 (m, 2H), 1.66-1.59 (m, 2H), 1.52-1.45 (m, 2H);  $^{13}\text{C}$  NMR (100 MHz,  $\text{CDCl}_3$ )  $\delta$ : 153.8 (dd,  $J = 289.4$  Hz, 285.1 Hz), 133.2, 132.4, 131.0 (t,  $J = 3.4$  Hz), 128.0, 127.9, 127.6, 127.3 (t,  $J = 3.4$  Hz), 126.2, 126.1 (t,  $J = 3.4$  Hz), 126.0, 92.4 (dd,  $J = 21.6$  Hz, 12.9 Hz), 72.4, 58.5, 28.9, 27.5, 24.4;  $^{19}\text{F}$  NMR (376 MHz,

$\text{CDCl}_3$ )  $\delta$ : -91.08 (d,  $J = 43.3$  Hz), -91.4 (d,  $J = 43.3$  Hz); **HRMS m/z (ESI)** calcd for  $\text{C}_{17}\text{H}_{18}\text{F}_2\text{O}$  ( $\text{M}+\text{H}$ )<sup>+</sup> 277.1404, found 277.1406.

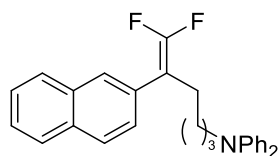

**N-(6,6-difluoro-5-(naphthalen-2-yl)hex-5-en-1-yl)-N-phenylamine (3l)** : According to Method C, the reaction was carried out with alcohol **1l** (68.1 mg, 0.3 mmol), **KO<sup>t</sup>Bu** (37.0 mg, 0.33 mmol), **dry THF** (3.0 mL), **CS<sub>2</sub>** (54.1  $\mu\text{L}$ , 0.9 mmol), and then trifluoromethyl alkene **2a** (80.0 mg, 0.36 mmol), **PhPCy<sub>2</sub>** (98.8 mg, 0.36 mmol), **Acetone/MeCN** (5.4 mL/0.6 mL). The crude product was purified by flash column chromatography on silica gel (PE:EA = 20:1) to afford 53 mg (43% yield) of **3l** as a colorless oil: **<sup>1</sup>H NMR (400 MHz, CDCl<sub>3</sub>)**  $\delta$ : 7.85-7.72 (m, 4H), 7.50 (t,  $J = 4.8$  Hz, 2H), 7.39 (d,  $J = 8.6$  Hz, 1H), 7.22 (t,  $J = 7.4$  Hz, 4H), 6.96-6.88 (m, 6H), 3.63 (t,  $J = 7.5$  Hz, 2H), 2.52 (t,  $J = 7.4$  Hz, 2H), 1.73-1.65 (m, 2H), 1.47-1.40 (m, 2H); **<sup>13</sup>C NMR (100 MHz, CDCl<sub>3</sub>)**  $\delta$ : 153.8 (dd,  $J = 288.9$  Hz, 285.1 Hz), 147.9, 133.2, 132.4, 130.9, 129.2, 128.1, 127.9, 127.6, 127.3 (t,  $J = 3.4$  Hz), 126.3, 126.1, 121.1, 120.8, 92.3 (dd,  $J = 21.1$  Hz, 13.4 Hz), 51.8, 27.4, 26.7, 25.1; **<sup>19</sup>F NMR (376 MHz, CDCl<sub>3</sub>)**  $\delta$ : -91.10 (d,  $J = 43.3$  Hz), -91.34 (d,  $J = 43.3$  Hz); **HRMS m/z (ESI)** calcd for  $\text{C}_{28}\text{H}_{25}\text{F}_2\text{N}$  ( $\text{M}+\text{H}$ )<sup>+</sup> 414.2033, found 414.2034.

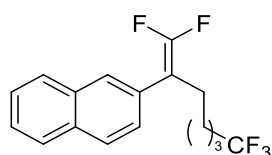

**2-(1,1,7,7,7-pentafluorohept-1-en-2-yl)naphthalene (3m)** : According to Method C, the reaction was carried out with alcohol **1m** (38.4 mg, 0.3 mmol), **KO<sup>t</sup>Bu** (37.0 mg, 0.33 mmol), **dry THF** (3.0 mL), **CS<sub>2</sub>** (54.1  $\mu\text{L}$ , 0.9 mmol), and then trifluoromethyl alkene **2a** (80.0 mg, 0.36 mmol), **PhPCy<sub>2</sub>** (98.8 mg, 0.36 mmol), **Acetone/MeCN** (5.4 mL/0.6 mL). The crude product was purified by flash column chromatography on silica gel (PE) to afford 31 mg (33% yield) of **3m** as a colorless oil: **<sup>1</sup>H NMR (400 MHz, CDCl<sub>3</sub>)**  $\delta$ : 7.86-7.76 (m, 4H), 7.53-7.41 (m, 3H), 2.57-2.52 (m, 2H), 2.06-2.00 (m, 2H), 1.64-1.56 (m, 2H), 1.51-1.43 (m, 2H); **<sup>13</sup>C NMR (100 MHz, CDCl<sub>3</sub>)**  $\delta$ : 153.9 (dd,  $J = 288.0$  Hz, 285.6 Hz), 133.2, 132.5, 130.7, 128.4, 128.2, 127.9, 127.6, 127.3 (t,  $J = 3.4$  Hz), 126.4, 126.2, 126.0 (t,  $J = 3.4$  Hz), 125.7, 91.9 (dd,  $J = 19.7$  Hz, 15.3 Hz), 33.5 (q,  $J = 287.5$  Hz), 27.3, 26.7, 21.2, 21.2; **<sup>19</sup>F NMR (376 MHz, CDCl<sub>3</sub>)**  $\delta$ : -66.30 (t,  $J = 10.1$  Hz), -90.88 (dd,  $J = 14.5$  Hz, 14.4 Hz);

**HRMS m/z (ESI)** calcd for  $C_{17}H_{15}F_5$  ( $M+H$ )<sup>+</sup> 315.1172, found 315.1173.

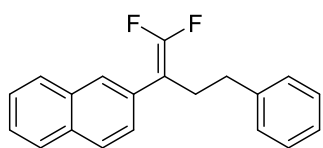

**2-(1,1-difluoro-4-phenylbut-1-en-2-yl)naphthalene (3n) :**

According to Method C, the reaction was carried out with alcohol **1n** (32.4 mg, 0.3 mmol), **KO<sup>t</sup>Bu** (37.0 mg, 0.33 mmol), **dry THF** (3.0 mL), **CS<sub>2</sub>** (54.1  $\mu$ L, 0.9 mmol), and then trifluoromethyl alkene **2a** (80.0 mg, 0.36 mmol), **PhPCy<sub>2</sub>** (98.8 mg, 0.36 mmol), **Acetone/MeCN** (5.4 mL/0.6 mL). The crude product was purified by flash column chromatography on silica gel (PE) to afford 40 mg (36% yield) of **3n** as a white solid: **<sup>1</sup>H NMR (400 MHz, CDCl<sub>3</sub>)**  $\delta$ : 7.89-7.79 (m, 4H), 7.55-7.46 (m, 3H), 7.31 (t,  $J$  = 7.6 Hz, 2H), 7.24-7.16 (m, 3H), 2.87-2.82 (m, 2H), 2.74-2.71 (m, 2H); **<sup>13</sup>C NMR (100 MHz, CDCl<sub>3</sub>)**  $\delta$ : 153.9 (dd,  $J$  = 289.9 Hz, 285.6 Hz), 133.3, 132.5, 130.8 (t,  $J$  = 3.8 Hz), 128.4, 128.3, 128.1, 127.9, 127.6, 127.4 (t,  $J$  = 3.8 Hz), 126.3, 126.2, 126.1, 92.0 (dd,  $J$  = 21.6 Hz, 13.4 Hz), 34.0, 29.7; **<sup>19</sup>F NMR (376 MHz, CDCl<sub>3</sub>)**  $\delta$ : -90.42 (d,  $J$  = 41.9 Hz), -91.06 (d,  $J$  = 41.9 Hz); **HRMS m/z (ESI)** calcd for  $C_{20}H_{16}F_2$  ( $M+H$ )<sup>+</sup> 295.1298, found 295.1295.

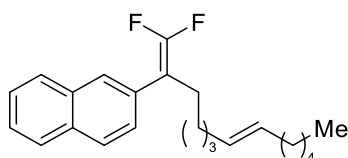

**(E)-2-(1,1-difluorotrideca-1,7-dien-2-yl)naphthalene**

**(3o) :** According to Method C, the reaction was carried out with alcohol **1o** (46.9 mg, 0.3 mmol), **KO<sup>t</sup>Bu** (37.0 mg, 0.33 mmol), **dry THF** (3.0 mL), **CS<sub>2</sub>** (54.1  $\mu$ L, 0.9

mmol), and then trifluoromethyl alkene **2a** (80.0 mg, 0.36 mmol), **PhPCy<sub>2</sub>** (98.8 mg, 0.36 mmol), **Acetone/MeCN** (5.4 mL/0.6 mL). The crude product was purified by flash column chromatography on silica gel (PE) to afford 50 mg (49% yield) of **3o** as a colorless oil: **<sup>1</sup>H NMR (400 MHz, CDCl<sub>3</sub>)**  $\delta$ : 7.84-7.76 (m, 4H), 7.50-7.42 (m, 3H), 5.36-5.29 (m, 2H), 2.53-2.49 (m, 2H), 2.02-1.95 (m, 4H), 1.43-1.24 (m, 10H), 0.88 (t,  $J$  = 7.1 Hz, 3H), **<sup>13</sup>C NMR (100 MHz, CDCl<sub>3</sub>)**  $\delta$ : 153.8 (dd,  $J$  = 288.5 Hz, 285.1 Hz), 133.3, 132.4, 131.2 (t,  $J$  = 3.8 Hz), 130.3, 129.3, 128.0, 127.9, 127.6, 127.3 (t,  $J$  = 3.4 Hz), 126.2, 126.2 (t,  $J$  = 3.4 Hz), 126.0, 92.5 (dd,  $J$  = 22.1 Hz, 12.5 Hz), 31.5, 29.4, 29.0, 27.6, 27.3, 27.1, 26.8, 22.5, 14.0; **<sup>19</sup>F NMR (376 MHz, CDCl<sub>3</sub>)**  $\delta$ : -91.32 (d,  $J$  = 44.8 Hz), -91.61 (d,  $J$  = 44.8 Hz); **HRMS m/z (ESI)** calcd for  $C_{23}H_{28}F_2$  ( $M+H$ )<sup>+</sup> 343.2237, found 343.2238.

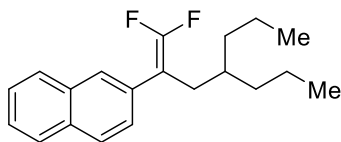

**2-(1,1-difluoro-4-propylhept-1-en-2-yl)naphthalene**

**(3p)** : According to Method C, the reaction was carried out with alcohol **1p** (34.9 mg, 0.3 mmol), **KO<sup>t</sup>Bu** (37.0 mg, 0.33 mmol), **dry THF** (3.0 mL), **CS<sub>2</sub>** (54.1 μL, 0.9 mmol), and then trifluoromethyl alkene **2a** (80.0 mg, 0.36 mmol), **PhPCy<sub>2</sub>** (98.8 mg, 0.36 mmol), **Acetone/MeCN** (5.4 mL/0.6 mL). The crude product was purified by flash column chromatography on silica gel (PE) to afford 72 mg (78% yield) of **3p** as a colorless oil: <sup>1</sup>H NMR (400 MHz, CDCl<sub>3</sub>) δ: 7.85-7.82 (m, 3H), 7.77 (s, 1H), 7.52-7.43 (m, 3H), 2.45-2.42 (m, 2H), 1.36-1.21 (m, 9H), 0.87-0.80 (m, 6H); <sup>13</sup>C NMR (100 MHz, CDCl<sub>3</sub>) δ: 154.1 (dd, *J* = 287.5 Hz, 286.1 Hz), 133.2, 132.4, 131.4, 127.9, 127.8, 127.6, 127.4 (t, *J* = 3.4 Hz), 126.2 (t, *J* = 2.9 Hz), 126.1, 126.0, 91.8 (dd, *J* = 19.6 Hz, 14.4 Hz), 35.3, 35.0, 32.1, 19.4, 14.4; <sup>19</sup>F NMR (376 MHz, CDCl<sub>3</sub>) δ: -91.28, -91.30; HRMS *m/z* (ESI) calcd for C<sub>20</sub>H<sub>24</sub>F<sub>2</sub> (M+H)<sup>+</sup> 303.1924, found 303.1923.

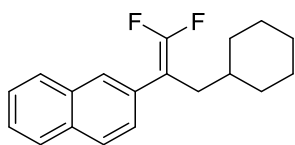

**2-(3-cyclohexyl-1,1-difluoroprop-1-en-2-yl)naphthalene**

**(3q)** : According to Method C, the reaction was carried out with alcohol **1q** (30.0 mg, 0.3 mmol), **KO<sup>t</sup>Bu** (37.0 mg, 0.33 mmol), **dry THF** (3.0 mL), **CS<sub>2</sub>** (54.1 μL, 0.9 mmol), and then trifluoromethyl alkene **2a** (80.0 mg, 0.36 mmol), **PhPCy<sub>2</sub>** (98.8 mg, 0.36 mmol), **Acetone/MeCN** (5.4 mL/0.6 mL). The crude product was purified by flash column chromatography on silica gel (PE) to afford 49 mg (57% yield) of **3q** as a white solid: <sup>1</sup>H NMR (400 MHz, CDCl<sub>3</sub>) δ: 7.84-7.77 (m, 4H), 7.51-7.43 (m, 3H), 2.40-2.37 (m, 2H), 1.74-1.58 (m, 5H), 1.30-1.25 (m, 1H), 1.15-1.04 (m, 3H), 0.99-0.91 (m, 2H); <sup>13</sup>C NMR (100 MHz, CDCl<sub>3</sub>) δ: 154.1 (dd, *J* = 288.9 Hz, 285.1 Hz), 133.2, 132.4, 131.4, 127.9, 127.9, 127.6, 127.3 (t, *J* = 3.4 Hz), 126.2 (t, *J* = 3.4 Hz), 126.2, 126.0, 91.2 (dd, *J* = 22.5 Hz, 12.5 Hz), 35.7, 35.3, 32.9, 26.4, 26.0; <sup>19</sup>F NMR (376 MHz, CDCl<sub>3</sub>) δ: -90.82 (d, *J* = 43.3 Hz), -91.53 (d, *J* = 43.3 Hz). All data are in accordance with the literature.<sup>7</sup>

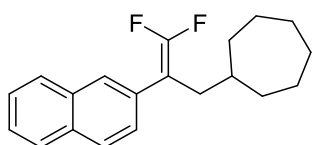

**2-(3-cycloheptyl-1,1-difluoroprop-1-en-2-yl)naphthalene**

**(3r)** : According to Method C, the reaction was carried out with alcohol **1r** (34.3 mg, 0.3 mmol), **KO<sup>t</sup>Bu** (37.0 mg,

0.33 mmol), **dry THF** (3.0 mL), **CS<sub>2</sub>** (54.1  $\mu$ L, 0.9 mmol), and then trifluoromethyl alkene **2a** (80.0 mg, 0.36 mmol), **PhPCy<sub>2</sub>** (98.8 mg, 0.36 mmol), **Acetone/MeCN** (5.4 mL/0.6 mL). The crude product was purified by flash column chromatography on silica gel (PE) to afford 64 mg (71% yield) of **3r** as a white solid: **<sup>1</sup>H NMR (400 MHz, CDCl<sub>3</sub>)**  $\delta$ : 7.85-7.76 (m, 4H), 7.50-7.42 (dt,  $J$  = 3.7 Hz, 8.6 Hz, 3H), 2.42-2.39 (m, 2H), 1.72-1.68 (m, 2H), 1.64-1.57 (m, 2H), 1.53-1.42 (m, 5H), 1.34-1.17 (m, 4H); **<sup>13</sup>C NMR (100 MHz, CDCl<sub>3</sub>)**  $\delta$ : 154.3 (dd,  $J$  = 288.5 Hz, 284.6 Hz), 133.2, 132.4, 131.4 (t,  $J$  = 4.3 Hz), 128.0, 127.9, 127.6, 127.3 (t,  $J$  = 2.9 Hz), 126.3 (t,  $J$  = 3.4 Hz), 126.2, 126.0, 91.8 (dd,  $J$  = 21.6 Hz, 12.5 Hz), 37.1, 35.7, 34.0, 28.4, 26.0; **<sup>19</sup>F NMR (376 MHz, CDCl<sub>3</sub>)**  $\delta$ : -91.13 (d,  $J$  = 43.2 Hz), -91.67 (d,  $J$  = 43.3 Hz). All data are in accordance with the literature.<sup>2</sup>

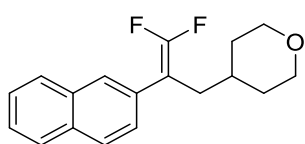

**4-(3,3-difluoro-2-(naphthalen-2-yl)allyl)tetrahydro-2H-pyran (3s)** : According to Method C, the reaction was carried out with alcohol **1s** (30.6 mg, 0.3 mmol), **KO<sup>t</sup>Bu** (37.0 mg, 0.33 mmol), **dry THF** (3.0 mL), **CS<sub>2</sub>** (54.1  $\mu$ L,

0.9 mmol), and then trifluoromethyl alkene **2a** (80.0 mg, 0.36 mmol), **PhPCy<sub>2</sub>** (98.8 mg, 0.36 mmol), **Acetone/MeCN** (5.4 mL/0.6 mL). The crude product was purified by flash column chromatography on silica gel (PE:EA = 20:1) to afford 44 mg (49% yield) of **3s** as a yellow oil: **<sup>1</sup>H NMR (400 MHz, CDCl<sub>3</sub>)**  $\delta$ : 7.87-7.77 (m, 4H), 7.53-7.43 (m, 3H), 3.93-3.89 (m, 2H), 3.24 (t,  $J$  = 11.8 Hz, 2H), 2.48-2.45 (m, 2H), 1.66-1.48 (m, 3H), 1.39-1.32 (m, 2H); **<sup>13</sup>C NMR (100 MHz, CDCl<sub>3</sub>)**  $\delta$ : 154.2 (dd,  $J$  = 289.9 Hz, 285.1 Hz), 133.2, 132.4, 131.1 (t,  $J$  = 3.8 Hz), 128.1, 127.9, 127.6, 127.3 (t,  $J$  = 3.4 Hz), 126.3, 126.2, 126.0 (t,  $J$  = 2.9 Hz), 90.5 (dd,  $J$  = 22.0 Hz, 12.9 Hz), 67.7, 34.8, 33.2, 32.6; **<sup>19</sup>F NMR (376 MHz, CDCl<sub>3</sub>)**  $\delta$ : -90.23 (d,  $J$  = 41.9 Hz), -90.81 (d,  $J$  = 41.9 Hz). All data are in accordance with the literature.<sup>7</sup>

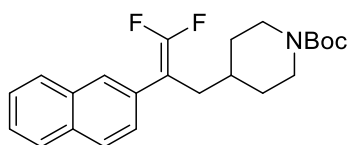

**Tert-butyl 4-(3,3-difluoro-2-(naphthalen-2-yl) allyl) piperidine-1-carboxylate (3t)** : According to Method C, the reaction was carried out with alcohol **1t** (60.3 mg, 0.3 mmol), **KO<sup>t</sup>Bu** (37.0 mg, 0.33 mmol), **dry THF** (3.0 mL), **CS<sub>2</sub>** (54.1  $\mu$ L, 0.9 mmol), and then trifluoromethyl alkene **2a** (80.0 mg, 0.36

mmol), **PhPCy<sub>2</sub>** (98.8 mg, 0.36 mmol), **Acetone/MeCN** (5.4 mL/0.6 mL). The crude product was purified by flash column chromatography on silica gel (PE:EA = 10:1) to afford 50 mg (43% yield) of **3t** as a colorless oil: <sup>1</sup>H NMR (400 MHz, CDCl<sub>3</sub>) δ: 7.85-7.76 (m, 4H), 7.51-7.42 (m, 3H), 4.20-3.87 (m, 2H), 2.54 (td, *J* = 12.5 Hz, 7.3 Hz, 4H), 1.68-1.59 (m, 3H), 1.44(s, 9H), 1.20-1.13 (m, 2H); <sup>13</sup>C NMR (100 MHz, CDCl<sub>3</sub>) δ: 154.7, 154.3 (dd, *J* = 289.4 Hz, 285.6 Hz), 133.2, 132.4, 131.0 (t, *J* = 3.8 Hz), 128.2, 127.9, 127.6, 127.3 (t, *J* = 3.4 Hz), 126.3, 126.2, 126.0 (t, *J* = 3.4 Hz), 90.7 (dd, *J* = 22.0 Hz, 12.9 Hz), 79.3, 34.4, 34.2, 31.7, 28.4; <sup>19</sup>F NMR (376 MHz, CDCl<sub>3</sub>) δ: -90.17 (d, *J* = 41.9 Hz), -90.80 (d, *J* = 41.9 Hz). All data are in accordance with the literature.<sup>7</sup>

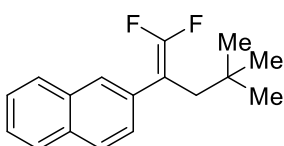

**2-(1,1-difluoro-4,4-dimethylpent-1-en-2-yl)naphthalene**

**(3u)** : According to Method C, the reaction was carried out with alcohol **1u** (22.2 mg, 0.3 mmol), **KO<sup>t</sup>Bu** (37.0 mg, 0.33 mmol), **dry THF** (3.0 mL), **CS<sub>2</sub>** (54.1 μL, 0.9 mmol), and then trifluoromethyl alkene **2a** (80.0 mg, 0.36 mmol), **PhPCy<sub>2</sub>** (98.8 mg, 0.36 mmol), **Acetone/MeCN** (5.4 mL/0.6 mL). The crude product was purified by flash column chromatography on silica gel (PE) to afford 47 mg (60% yield) of **3u** as a white solid: <sup>1</sup>H NMR (400 MHz, CDCl<sub>3</sub>) δ: 7.84-7.79 (m, 4H), 7.50-7.44 (m, 3H), 2.46(m, 2H), 0.83 (s, 9H); <sup>13</sup>C NMR (100 MHz, CDCl<sub>3</sub>) δ: 154.6 (dd, *J* = 288.9 Hz, 286.5 Hz), 133.2, 133.1 (t, *J* = 4.3 Hz), 132.3, 127.8, 127.6, 127.4 (t, *J* = 2.9 Hz), 126.5 (t, *J* = 2.9 Hz), 126.2, 125.9, 91.2 (dd, *J* = 21.6 Hz, 12.5 Hz), 41.2, 32.8, 29.7; <sup>19</sup>F NMR (376 MHz, CDCl<sub>3</sub>) δ: -89.16 (d, *J* = 40.4 Hz), -92.00 (d, *J* = 40.5 Hz). All data are in accordance with the literature.<sup>8</sup>

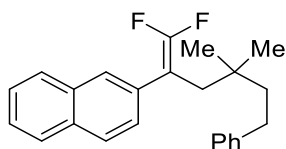

**2-(1,1-difluoro-4,4-dimethyl-6-phenylhex-1-en-2-yl)naphthalene**

**(3v)** : According to Method C, the reaction was carried out with alcohol **1v** (49.3 mg, 0.3 mmol), **KO<sup>t</sup>Bu** (37.0 mg, 0.33 mmol), **dry THF** (3.0 mL), **CS<sub>2</sub>** (54.1 μL, 0.9 mmol), and then trifluoromethyl alkene **2a** (80.0 mg, 0.36 mmol), **PhPCy<sub>2</sub>** (98.8 mg, 0.36 mmol), **Acetone/MeCN** (5.4 mL/0.6 mL). The crude product was purified by flash column chromatography on silica gel (PE) to afford 77 mg (73% yield) of **3v** as

a white solid:  $^1\text{H NMR}$  (400 MHz,  $\text{CDCl}_3$ )  $\delta$ : 7.86-7.82 (m, 4H), 7.52-7.47 (m, 3H), 7.17-7.09 (m, 3H), 6.88 (dd,  $J = 2.1$  Hz, 1.7 Hz, 2H), 2.55 (t,  $J = 2.5$  Hz, 2H), 2.50-2.45 (m, 2H), 1.50-1.46 (m, 2H), 0.89 (s, 6H);  $^{13}\text{C NMR}$  (100 MHz,  $\text{CDCl}_3$ )  $\delta$ : 154.6 (dd,  $J = 288.5$  Hz, 287.0 Hz), 142.9, 133.3, 133.0, 132.4, 128.2, 128.0, 127.8, 127.6, 127.5 (t,  $J = 2.9$  Hz), 126.5 (t,  $J = 2.4$  Hz), 126.3, 126.0, 125.5, 90.1 (dd,  $J = 21.6$  Hz, 13.4 Hz), 44.5, 39.1, 35.5, 30.6, 27.4;  $^{19}\text{F NMR}$  (376 MHz,  $\text{CDCl}_3$ )  $\delta$ : -88.83 (d,  $J = 40.4$  Hz), -91.45 (d,  $J = 39.0$  Hz), **HRMS  $m/z$  (ESI)** calcd for  $\text{C}_{24}\text{H}_{24}\text{F}_2$  ( $\text{M}+\text{H}$ ) $^+$  351.1924, found 351.1925.

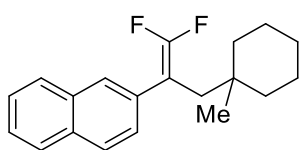

**2-(1,1-difluoro-3-(1-methylcyclohexyl)prop-1-en-2-yl)naphthalene (3w)** : According to Method C, the reaction was carried out with alcohol **1w** (34.3 mg, 0.3 mmol), **KO<sup>t</sup>Bu** (37.0 mg, 0.33 mmol), **dry THF** (3.0 mL), **CS<sub>2</sub>** (54.1  $\mu\text{L}$ , 0.9 mmol), and then trifluoromethyl alkene **2a** (80.0 mg, 0.36 mmol), **PhPCy<sub>2</sub>** (98.8 mg, 0.36 mmol), **Acetone/MeCN** (5.4 mL/0.6 mL). The crude product was purified by flash column chromatography on silica gel (PE) to afford 76 mg (84% yield) of **3w** as a white solid:  $^1\text{H NMR}$  (400 MHz,  $\text{CDCl}_3$ )  $\delta$ : 7.85-7.79 (m, 4H), 7.52-7.46 (m, 3H), 2.48 (t,  $J = 2.6$  Hz, 2H), 1.43-1.29 (m, 5H), 1.24-1.16 (m, 5H), 0.80 (s, 3H);  $^{13}\text{C NMR}$  (100 MHz,  $\text{CDCl}_3$ )  $\delta$ : 154.6 (dd,  $J = 288.5$  Hz, 286.5 Hz), 133.3, 132.3, 127.9, 127.8, 127.6, 127.4 (t,  $J = 2.9$  Hz), 126.6 (t,  $J = 2.4$  Hz), 126.1, 125.9, 90.7 (dd,  $J = 21.6$  Hz, 12.9 Hz), 40.4, 38.0, 35.2, 26.2, 24.6, 22.0;  $^{19}\text{F NMR}$  (376 MHz,  $\text{CDCl}_3$ )  $\delta$ : -88.81 (d,  $J = 40.4$  Hz), -91.76 (d,  $J = 40.4$  Hz). All data are in accordance with the literature.<sup>9</sup>

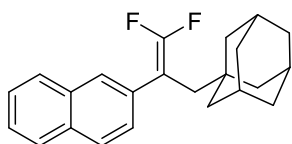

**(3r,5r,7r)-1-(3,3-difluoro-2-(naphthalen-2-yl)allyl)adamantane (3x)** : According to Method C, the reaction was carried out with alcohol **1x** (45.7 mg, 0.3 mmol), **KO<sup>t</sup>Bu** (37.0 mg, 0.33 mmol), **dry THF** (3.0 mL), **CS<sub>2</sub>** (54.1  $\mu\text{L}$ , 0.9 mmol), and then trifluoromethyl alkene **2a** (80.0 mg, 0.36 mmol), **PhPCy<sub>2</sub>** (98.8 mg, 0.36 mmol), **Acetone/MeCN** (5.4 mL/0.6 mL). The crude product was purified by flash column chromatography on silica gel (PE) to afford 80 mg (79% yield) of **3x** as a white solid:  $^1\text{H NMR}$  (400 MHz,  $\text{CDCl}_3$ )  $\delta$ : 7.84-7.79 (m, 4H), 7.51-7.45 (m,

3H), 2.33 (t,  $J = 2.7$  Hz, 2H), 1.89-1.82 (m, 3H), 1.64-1.51 (m, 6H), 1.44-1.38 (m, 6H);  $^{13}\text{C}$  NMR (100 MHz,  $\text{CDCl}_3$ )  $\delta$ : 154.6 (dd,  $J = 289.4$  Hz, 286.1 Hz), 133.4, 133.2, 132.3, 127.9, 127.8, 127.6, 127.2 (t,  $J = 3.4$  Hz), 126.5 (t,  $J = 2.9$  Hz), 126.1, 125.9, 89.9 (dd,  $J = 21.6$  Hz, 12.5 Hz), 42.6, 42.0, 36.8, 34.7, 28.5;  $^{19}\text{F}$  NMR (376 MHz,  $\text{CDCl}_3$ )  $\delta$ : -88.37 (d,  $J = 39.0$  Hz), -91.70 (d,  $J = 40.5$  Hz); HRMS  $m/z$  (ESI) calcd for  $\text{C}_{23}\text{H}_{24}\text{F}_2$  ( $\text{M}+\text{H}$ ) $^+$  339.1924, found 339.1921.

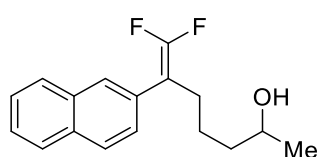

**7,7-difluoro-6-(naphthalen-2-yl)hept-6-en-2-ol (3y) :**

According to Method C, the reaction was carried out with alcohol **1y** (27.0 mg, 0.3 mmol),  $\text{KO}^t\text{Bu}$  (37.0 mg, 0.33 mmol), dry THF (3.0 mL),  $\text{CS}_2$  (54.1  $\mu\text{L}$ , 0.9 mmol), and then trifluoromethyl alkene **2a** (80.0 mg, 0.36 mmol),  $\text{PhPCy}_2$  (98.8 mg, 0.36 mmol), Acetone/MeCN (5.4 mL/0.6 mL). The crude product was purified by flash column chromatography on silica gel (PE:EA = 5:1) to afford 37 mg (45% yield) of **3y** as a yellow oil:  $^1\text{H}$  NMR (400 MHz,  $\text{CDCl}_3$ )  $\delta$ : 7.85-7.78 (m, 4H), 7.51-7.43 (m, 3H), 3.73-3.72 (m, 1H), 2.56-2.51 (m, 2H), 1.52-1.41 (m, 4H), 1.51 (d,  $J = 6.2$  Hz, 3H);  $^{13}\text{C}$  NMR (100 MHz,  $\text{CDCl}_3$ )  $\delta$ : 153.8 (dd,  $J = 288.9$  Hz, 285.6 Hz), 133.2, 132.4, 131.0 (t,  $J = 3.4$  Hz), 128.0, 127.9, 127.6, 127.3 (t,  $J = 3.4$  Hz), 126.3, 126.1, 92.3 (dd,  $J = 21.6$  Hz, 12.9 Hz), 67.8, 38.4, 27.6, 23.9, 23.5;  $^{19}\text{F}$  NMR (376 MHz,  $\text{CDCl}_3$ )  $\delta$ : -91.06 (d,  $J = 43.4$  Hz), -91.36 (d,  $J = 43.3$  Hz); HRMS  $m/z$  (ESI) calcd for  $\text{C}_{17}\text{H}_{18}\text{F}_2\text{O}$  ( $\text{M}+\text{H}$ ) $^+$  277.1404, found 277.1405.

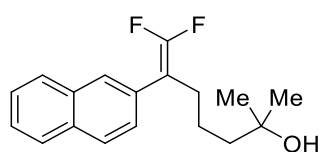

**7,7-difluoro-2-methyl-6-(naphthalen-2-yl)hept-6-en-2-ol (3z) :**

According to Method C, the reaction was carried out with alcohol **1z** (31.2 mg, 0.3 mmol),  $\text{KO}^t\text{Bu}$  (37.0 mg, 0.33 mmol), dry THF (3.0 mL),  $\text{CS}_2$  (54.1  $\mu\text{L}$ , 0.9 mmol), and then trifluoromethyl alkene **2a** (80.0 mg, 0.36 mmol),  $\text{PhPCy}_2$  (98.8 mg, 0.36 mmol), Acetone/MeCN (5.4 mL/0.6 mL). The crude product was purified by flash column chromatography on silica gel (PE:EA = 5:1) to afford 58 mg (67% yield) of **3z** as a yellow solid:  $^1\text{H}$  NMR (400 MHz,  $\text{CDCl}_3$ )  $\delta$ : 7.84-7.77 (m, 4H), 7.51-7.43 (m, 3H), 2.54-2.50 (m, 2H), 1.54-1.43 (m, 4H), 1.14 (s, 6H);  $^{13}\text{C}$  NMR (100 MHz,  $\text{CDCl}_3$ )  $\delta$ : 153.8 (dd,  $J = 289.4$  Hz, 285.1 Hz), 133.2, 132.4, 131.0 (t,  $J = 3.8$  Hz),



128.1, 127.9, 127.6, 127.3 (t,  $J = 3.4$  Hz), 126.2, 126.1 (t,  $J = 3.4$  Hz), 126.0, 92.4 (dd,  $J = 21.6$  Hz, 12.9 Hz), 70.8, 43.0, 29.2, 28.1, 22.1;  $^{19}\text{F}$  NMR (376 MHz,  $\text{CDCl}_3$ )  $\delta$ : -91.06 (d,  $J = 43.3$  Hz), -91.40 (d,  $J = 43.4$  Hz); HRMS  $m/z$  (ESI) calcd for  $\text{C}_{18}\text{H}_{20}\text{F}_2\text{O}$  ( $\text{M}+\text{Na}$ ) $^+$  313.1380, found 313.1384.

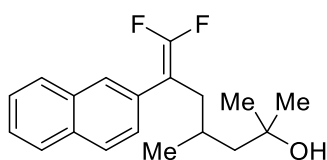

**7,7-difluoro-2,4-dimethyl-6-(naphthalen-2-yl)hept-6-en**

**-2-ol (3aa)** : According to Method C, the reaction was carried out with alcohol **1aa** (35.5 mg, 0.3 mmol),  $\text{KO}^t\text{Bu}$  (37.0 mg, 0.33 mmol), **dry THF** (3.0 mL),  $\text{CS}_2$  (54.1  $\mu\text{L}$ ,

0.9 mmol), and then trifluoromethyl alkene **2a** (80.0 mg, 0.36 mmol),  $\text{PhPCy}_2$  (98.8 mg, 0.36 mmol), **Acetone/MeCN** (5.4 mL/0.6 mL). The crude product was purified by flash column chromatography on silica gel (PE:EA = 5:1) to afford 47 mg (52% yield) of **3aa** as a yellow oil:  $^1\text{H}$  NMR (400 MHz,  $\text{CDCl}_3$ )  $\delta$ : 7.85-7.80 (m, 4H), 7.52-7.46 (m, 3H), 2.70-2.64 (m, 1H), 2.37-2.31 (m, 1H), 1.70-1.54 (m, 2H), 1.40-1.34 (m, 1H), 1.14 (d,  $J = 4.9$  Hz, 6H), 0.99 (d,  $J = 6.5$  Hz, 3H);  $^{13}\text{C}$  NMR (100 MHz,  $\text{CDCl}_3$ )  $\delta$ : 154.4 (dd,  $J = 289.4$  Hz, 284.6 Hz), 133.3, 133.2, 133.0, 132.7, 132.4, 131.1 (t,  $J = 3.8$  Hz), 129.0, 128.7, 128.4, 128.0, 127.9, 127.6, 127.4 (t,  $J = 3.4$  Hz), 126.5, 126.3, 126.2, 126.1 (t,  $J = 3.4$  Hz), 126.0, 91.7 (dd,  $J = 21.6$  Hz, 12.5 Hz), 71.4, 71.2, 51.0, 49.8, 49.3, 37.9, 36.2, 30.2, 30.0, 29.9, 29.8, 27.7, 26.6, 25.8, 23.2, 21.4, 20.6;  $^{19}\text{F}$  NMR (376 MHz,  $\text{CDCl}_3$ )  $\delta$ : -69.14 (d,  $J = 10.1$  Hz), -90.59 (d,  $J = 41.9$  Hz), -91.35 (d,  $J = 41.9$  Hz); HRMS  $m/z$  (ESI) calcd for  $\text{C}_{19}\text{H}_{22}\text{F}_2\text{O}$  ( $\text{M}+\text{Na}$ ) $^+$  327.1536, found 327.1538.

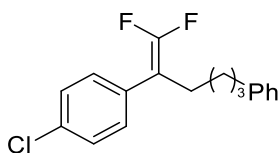

**1-chloro-4-(1,1-difluoro-6-phenylhex-1-en-2-yl)benzene**

**(3ab)** : According to Method C, the reaction was carried out with alcohol **1a** (40.9 mg, 0.3 mmol),  $\text{KO}^t\text{Bu}$  (37.0 mg, 0.33 mmol), **dry THF** (3.0 mL),  $\text{CS}_2$  (54.1  $\mu\text{L}$ , 0.9 mmol), and

then trifluoromethyl alkene **2b** (74.2 mg, 0.36 mmol),  $\text{PhPCy}_2$  (98.8 mg, 0.36 mmol), **Acetone/MeCN** (5.4 mL/0.6 mL). The crude product was purified by flash column chromatography on silica gel (PE) to afford 42 mg (46% yield) of **3ab** as a colorless oil:  $^1\text{H}$  NMR (400 MHz,  $\text{CDCl}_3$ )  $\delta$ : 7.34-7.26 (m, 4H), 7.23-7.13 (m, 5H), 2.58 (t,  $J = 7.8$  Hz, 2H), 2.44-2.39 (m, 2H), 1.67-1.59 (m, 2H), 1.44-1.37 (m, 2H);  $^{13}\text{C}$  NMR (100

**MHz, CDCl<sub>3</sub>**)  $\delta$ : 153.6 (dd,  $J = 288.5$  Hz, 286.1 Hz), 142.2, 133.0, 132.1, 129.5 (t,  $J = 3.4$  Hz), 128.6, 128.3, 128.2, 125.7, 91.5 (dd,  $J = 20.1$  Hz, 14.9 Hz), 35.5, 30.6, 27.2, 27.1; **<sup>19</sup>F NMR (376 MHz, CDCl<sub>3</sub>)**  $\delta$ : -90.82, -90.84. All data are in accordance with the literature.<sup>10</sup>

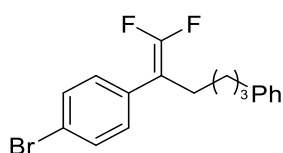

**1-bromo-4-(1,1-difluoro-6-phenylhex-1-en-2-yl)benzene**

**(3ac)** : According to Method C, the reaction was carried out with alcohol **1a** (40.9 mg, 0.3 mmol), **KO<sup>t</sup>Bu** (37.0 mg, 0.33 mmol), **dry THF** (3.0 mL), **CS<sub>2</sub>** (54.1  $\mu$ L, 0.9 mmol),

and then trifluoromethyl alkene **2c** (90.0 mg, 0.36 mmol), **PhPCy<sub>2</sub>** (98.8 mg, 0.36 mmol), **Acetone/MeCN** (5.4 mL/0.6 mL). The crude product was purified by flash column chromatography on silica gel (PE) to afford 52 mg (50% yield) of **3ac** as a colorless oil: **<sup>1</sup>H NMR (400 MHz, CDCl<sub>3</sub>)**  $\delta$ : 7.49 (d,  $J = 8.6$  Hz, 2H), 7.27 (t,  $J = 7.2$  Hz, 2H), 7.20-7.12 (m, 5H), 2.58 (t,  $J = 7.5$  Hz, 2H), 2.43-2.38 (m, 2H), 1.66-1.58 (m, 2H), 1.43-1.36 (m, 2H); **<sup>13</sup>C NMR (100 MHz, CDCl<sub>3</sub>)**  $\delta$ : 153.5 (dd,  $J = 288.5$  Hz, 286.5 Hz), 142.2, 132.6, 131.6, 129.9 (t,  $J = 3.4$  Hz), 128.3, 128.2, 125.7, 121.1, 91.5 (dd,  $J = 21.6$  Hz, 13.9 Hz), 35.4, 30.6, 27.2, 27.1; **<sup>19</sup>F NMR (376 MHz, CDCl<sub>3</sub>)**  $\delta$ : -90.67 (d,  $J = 43.3$  Hz), -90.83 (d,  $J = 43.3$  Hz); **HRMS m/z (ESI)** calcd for C<sub>18</sub>H<sub>17</sub>BrF<sub>2</sub> (M+Na)<sup>+</sup> 373.0379, found 373.0381.

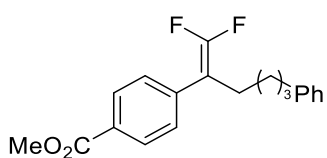

**Methyl 4-(1,1-difluoro-6-phenylhex-1-en-2-yl) benzoate**

**(3ad)**: According to Method C, the reaction was carried out with alcohol **1a** (40.9 mg, 0.3 mmol), **KO<sup>t</sup>Bu** (37.0 mg, 0.33 mmol), **dry THF** (3.0 mL), **CS<sub>2</sub>** (54.1  $\mu$ L, 0.9 mmol),

and then trifluoromethyl alkene **2d** (82.8 mg, 0.36 mmol), **PhPCy<sub>2</sub>** (98.8 mg, 0.36 mmol), **Acetone/MeCN** (5.4 mL/0.6 mL). The crude product was purified by flash column chromatography on silica gel (PE:EA = 20:1) to afford 79 mg (80% yield) of **3ad** as a colorless oil: **<sup>1</sup>H NMR (400 MHz, CDCl<sub>3</sub>)**  $\delta$ : 8.04 (d,  $J = 8.6$  Hz, 2H), 7.38 (d,  $J = 8.7$  Hz, 2H), 7.29-7.25 (m, 2H), 7.18 (td,  $J = 7.2$  Hz, 6.8 Hz, 3H), 3.93 (s, 3H), 2.58 (t,  $J = 7.9$  Hz, 2H), 2.49-2.44 (m, 2H), 1.67-1.60 (m, 2H), 1.45-1.38 (m, 2H); **<sup>13</sup>C NMR (100 MHz, CDCl<sub>3</sub>)**  $\delta$ : 166.7, 153.8 (dd,  $J = 290.9$  Hz, 286.6 Hz), 142.2, 138.5 (t,  $J = 3.8$  Hz), 129.7, 128.8, 128.3, 128.2, 128.1 (t,  $J = 3.4$  Hz), 125.7, 92.0 (dd,  $J =$

22.0 Hz, 12.5 Hz), 52.1, 35.4, 30.6, 27.2, 27.0;  $^{19}\text{F}$  NMR (376 MHz,  $\text{CDCl}_3$ )  $\delta$ : -89.28 (d,  $J = 39.0$  Hz), -89.52 (d,  $J = 39.0$  Hz); HRMS  $m/z$  (ESI) calcd for  $\text{C}_{20}\text{H}_{20}\text{F}_2$  ( $\text{M}+\text{H}$ ) $^+$  331.1510, found 331.1509.

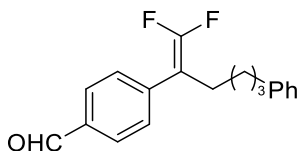

**4-(1,1-difluoro-6-phenylhex-1-en-2-yl)benzaldehyde**

**(3ae)** : According to Method C, the reaction was carried out with alcohol **1a** (40.9 mg, 0.3 mmol), **KO<sup>t</sup>Bu** (37.0 mg, 0.33 mmol), **dry THF** (3.0 mL), **CS<sub>2</sub>** (54.1  $\mu\text{L}$ , 0.9 mmol), and then trifluoromethyl alkene **2e** (72.0 mg, 0.36 mmol), **PhPCy<sub>2</sub>** (98.8 mg, 0.36 mmol), **Acetone/MeCN** (5.4 mL/0.6 mL). The crude product was purified by flash column chromatography on silica gel (PE:EA = 10:1) to afford 43 mg (43% yield) of **3ae** as a yellow oil:  $^1\text{H}$  NMR (400 MHz,  $\text{CDCl}_3$ )  $\delta$ : 10.01 (s, 1H), 7.87-7.85 (d,  $J = 8.3$  Hz, 2H), 7.47 (d,  $J = 6.9$  Hz, 2H), 7.28-7.24 (m, 2H), 7.19-7.12 (m, 3H), 2.58 (t,  $J = 7.8$  Hz, 2H), 2.50-2.45 (m, 2H), 1.68-1.60 (m, 2H), 1.46-1.38 (m, 2H);  $^{13}\text{C}$  NMR (100 MHz,  $\text{CDCl}_3$ )  $\delta$ : 191.6, 153.9 (dd,  $J = 291.3$  Hz, 287.5 Hz), 142.1, 140.2 (t,  $J = 4.3$  Hz), 135.1, 129.8, 128.7 (t,  $J = 3.4$  Hz), 128.3, 125.8, 92.1 (dd,  $J = 22.5$  Hz, 11.5 Hz), 35.4, 30.6, 27.2, 27.0;  $^{19}\text{F}$  NMR (376 MHz,  $\text{CDCl}_3$ )  $\delta$ : -88.36 (d,  $J = 37.6$  Hz), -88.74 (d,  $J = 36.1$  Hz); HRMS  $m/z$  (ESI) calcd for  $\text{C}_{19}\text{H}_{18}\text{F}_2\text{O}$  ( $\text{M}+\text{H}$ ) $^+$  301.1404, found 301.1407.

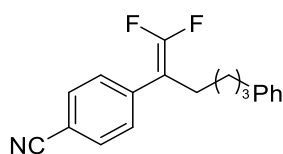

**4-(1,1-difluoro-6-phenylhex-1-en-2-yl)benzotrile (3af)** :

According to Method C, the reaction was carried out with alcohol **1a** (40.9 mg, 0.3 mmol), **KO<sup>t</sup>Bu** (37.0 mg, 0.33 mmol), **dry THF** (3.0 mL), **CS<sub>2</sub>** (54.1  $\mu\text{L}$ , 0.9 mmol), and then trifluoromethyl alkene **2f** (71.0 mg, 0.36 mmol), **PhPCy<sub>2</sub>** (98.8 mg, 0.36 mmol), **Acetone/MeCN** (5.4 mL/0.6 mL). The crude product was purified by flash column chromatography on silica gel (PE:EA = 20:1) to afford 44 mg (49% yield) of **3af** as a colorless oil:  $^1\text{H}$  NMR (400 MHz,  $\text{CDCl}_3$ )  $\delta$ : 7.64 (d,  $J = 8.4$  Hz, 2H), 7.39 (d,  $J = 8.2$  Hz, 2H), 7.08-7.25 (m, 2H), 7.18 (t,  $J = 7.1$  Hz, 1H), 7.13 (d,  $J = 6.8$  Hz, 2H), 2.58 (t,  $J = 7.8$  Hz, 2H), 2.47-2.42 (m, 2H), 1.66-1.59 (m, 2H), 1.43-1.36 (m, 2H);  $^{13}\text{C}$  NMR (100 MHz,  $\text{CDCl}_3$ )  $\delta$ : 153.9 (dd,  $J = 291.3$  Hz, 287.8 Hz), 142.0, 138.7, 132.2, 128.8 (t,  $J = 3.4$  Hz), 128.3, 125.8, 118.7, 110.9, 91.7 (dd,  $J = 23.0$  Hz, 11.5 Hz), 35.4,

30.5, 27.1, 26.9;  $^{19}\text{F}$  NMR (376 MHz,  $\text{CDCl}_3$ )  $\delta$ : -87.94 (d,  $J = 36.1$  Hz), -88.49 (d,  $J = 36.1$  Hz); HRMS  $m/z$  (ESI) calcd for  $\text{C}_{19}\text{H}_{17}\text{F}_2\text{N}$  ( $\text{M}+\text{H}$ ) $^+$  298.1407, found 298.1408.

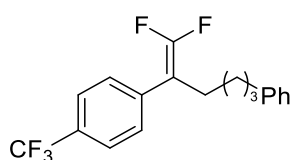

**1-(1,1-difluoro-6-phenylhex-1-en-2-yl)-4-(trifluoromethyl)benzene (3ag)** : According to Method C, the reaction was carried out with alcohol **1a** (40.9 mg, 0.3 mmol), **KO<sup>t</sup>Bu** (37.0 mg, 0.33 mmol), **dry THF** (3.0 mL), **CS<sub>2</sub>** (54.1  $\mu\text{L}$ , 0.9 mmol), and then trifluoromethyl alkene **2g** (70.9 mg, 0.36 mmol), **PhPCy<sub>2</sub>** (98.8 mg, 0.36 mmol), **Acetone/MeCN** (5.4 mL/0.6 mL). The crude product was purified by flash column chromatography on silica gel (PE) to afford 65 mg (64% yield) of **3ag** as a colorless oil:  $^1\text{H}$  NMR (400 MHz,  $\text{CDCl}_3$ )  $\delta$ : 7.62 (d,  $J = 8.4$  Hz, 2H), 7.41 (d,  $J = 8.3$  Hz, 2H), 7.32-7.25 (m, 3H), 7.20-7.12 (m, 3H), 2.58 (t,  $J = 7.9$  Hz, 2H), 2.48-2.43 (m, 2H), 1.67-1.59 (m, 2H), 1.44-1.37 (m, 2H);  $^{13}\text{C}$  NMR (100 MHz,  $\text{CDCl}_3$ )  $\delta$ : 153.8 (t,  $J = 287.9$  Hz), 142.1, 137.5, 129.4 (q,  $J = 32.6$  Hz), 128.5, 128.3, 125.8, 125.4, 122.7, 91.7 (dd,  $J = 22.0$  Hz, 12.5 Hz), 35.4, 30.6, 27.1;  $^{19}\text{F}$  NMR (376 MHz,  $\text{CDCl}_3$ )  $\delta$ : -62.51, -89.55 (d,  $J = 40.5$  Hz), -89.95 (d,  $J = 39.0$  Hz); HRMS  $m/z$  (ESI) calcd for  $\text{C}_{19}\text{H}_{17}\text{F}_5$  ( $\text{M}+\text{H}$ ) $^+$  341.1329, found 341.1330.

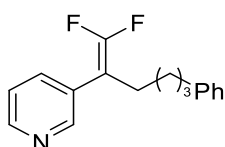

**3-(1,1-difluoro-6-phenylhex-1-en-2-yl)pyridine (3ah)** : According to Method C, the reaction was carried out with alcohol **1a** (40.9 mg, 0.3 mmol), **KO<sup>t</sup>Bu** (37.0 mg, 0.33 mmol), **dry THF** (3.0 mL), **CS<sub>2</sub>** (54.1  $\mu\text{L}$ , 0.9 mmol), and then trifluoromethyl alkene **2h** (62.3 mg, 0.36 mmol), **PhPCy<sub>2</sub>** (98.8 mg, 0.36 mmol), **Acetone/MeCN** (5.4 mL/0.6 mL). The crude product was purified by flash column chromatography on silica gel (PE:EA = 10:1) to afford 58 mg (71% yield) of **3ah** as a yellow oil:  $^1\text{H}$  NMR (400 MHz,  $\text{CDCl}_3$ )  $\delta$ : 8.56-8.51 (m, 2H), 7.59 (d,  $J = 8.0$  Hz, 1H), 7.30-7.10 (m, 6H), 2.58 (t,  $J = 7.8$  Hz, 2H), 2.46-2.41 (m, 2H), 1.67-1.59 (m, 2H), 1.45-1.38 (m, 2H);  $^{13}\text{C}$  NMR (100 MHz,  $\text{CDCl}_3$ )  $\delta$ : 153.8 (dd,  $J = 289.9$  Hz, 287.0 Hz), 149.2 (t,  $J = 3.8$  Hz), 148.3, 142.1, 135.5, 129.7, 128.3, 125.7, 123.3, 89.7 (dd,  $J = 24.0$  Hz, 12.5 Hz), 35.4, 30.6, 27.1, 27.0;  $^{19}\text{F}$  NMR (376 MHz,  $\text{CDCl}_3$ )  $\delta$ : -89.42 (d,  $J = 40.4$  Hz), -90.14 (d,  $J = 40.5$  Hz); HRMS  $m/z$  (ESI) calcd for  $\text{C}_{17}\text{H}_{17}\text{F}_2\text{N}$  ( $\text{M}+\text{H}$ ) $^+$  274.1407,

found 274.1409.

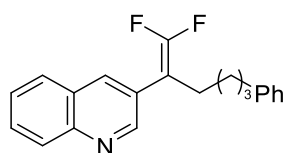

**3-(1,1-difluoro-6-phenylhex-1-en-2-yl)quinoline (3ai) :**

According to Method C, the reaction was carried out with alcohol **1a** (40.9 mg, 0.3 mmol), **KO<sup>t</sup>Bu** (37.0 mg, 0.33 mmol), **dry THF** (3.0 mL), **CS<sub>2</sub>** (54.1  $\mu$ L, 0.9 mmol), and then trifluoromethyl alkene **2i** (80.3 mg, 0.36 mmol), **PhPCy<sub>2</sub>** (98.8 mg, 0.36 mmol), **Acetone/MeCN** (5.4 mL/0.6 mL). The crude product was purified by flash column chromatography on silica gel (PE:EA = 10:1) to afford 75 mg (76% yield) of **3ai** as a yellow oil: **<sup>1</sup>H NMR (400 MHz, CDCl<sub>3</sub>)**  $\delta$ : 8.88 (t,  $J$  = 2.0 Hz, 1H), 8.13-8.03 (m, 2H), 7.81-7.71 (m, 2H), 7.58 (t,  $J$  = 8.2 Hz, 1H), 7.26-7.11 (m, 5H), 2.60-2.53 (m, 4H), 1.70-1.63 (m, 2H), 1.50-1.42 (m, 2H); **<sup>13</sup>C NMR (100 MHz, CDCl<sub>3</sub>)**  $\delta$ : 154.1 (dd,  $J$  = 290.4 Hz, 287.5 Hz), 150.1, 146.8, 142.1, 135.0, 129.7, 129.1, 128.3, 127.7, 127.6, 127.1, 126.9 (t,  $J$  = 4.3 Hz), 125.8, 89.9 (dd,  $J$  = 23.5 Hz, 12.9 Hz), 35.4, 30.6, 27.1; **<sup>19</sup>F NMR (376 MHz, CDCl<sub>3</sub>)**  $\delta$ : -89.01 (d,  $J$  = 39.0 Hz), -89.85 (d,  $J$  = 40.4 Hz); **HRMS m/z (ESI)** calcd for C<sub>21</sub>H<sub>19</sub>F<sub>2</sub>N (M+H)<sup>+</sup> 324.1564, found 324.1567.

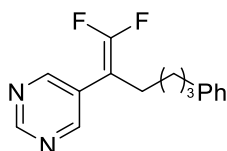

**5-(1,1-difluoro-6-phenylhex-1-en-2-yl)pyrimidine (3aj) :**

According to Method C, the reaction was carried out with alcohol **1a** (40.9 mg, 0.3 mmol), **KO<sup>t</sup>Bu** (37.0 mg, 0.33 mmol), **dry THF** (3.0 mL), **CS<sub>2</sub>** (54.1  $\mu$ L, 0.9 mmol), and then trifluoromethyl alkene **2j** (62.7 mg, 0.36 mmol), **PhPCy<sub>2</sub>** (98.8 mg, 0.36 mmol), **Acetone/MeCN** (5.4 mL/0.6 mL). The crude product was purified by flash column chromatography on silica gel (PE:EA = 20:1) to afford 38 mg (46% yield) of **3aj** as a yellow oil: **<sup>1</sup>H NMR (400 MHz, CDCl<sub>3</sub>)**  $\delta$ : 9.12 (s, 1H), 8.68 (s, 1H), 7.27 (t,  $J$  = 7.6 Hz, 2H), 7.19-7.12 (m, 3H), 2.59 (t,  $J$  = 7.7 Hz, 2H), 2.47-2.43 (m, 2H), 1.68-1.60 (m, 2H), 1.47-1.39 (m, 2H); **<sup>13</sup>C NMR (100 MHz, CDCl<sub>3</sub>)**  $\delta$ : 157.1, 155.8 (t,  $J$  = 3.8 Hz), 154.2 (dd,  $J$  = 293.2 Hz, 288.9 Hz), 141.8, 128.3, 128.2, 128.0 (t,  $J$  = 4.3 Hz), 125.9, 87.2 (dd,  $J$  = 26.9 Hz, 12.5 Hz), 35.4, 30.5, 27.0, 26.3; **<sup>19</sup>F NMR (376 MHz, CDCl<sub>3</sub>)**  $\delta$ : -86.79 (d,  $J$  = 36.1 Hz), -87.95 (d,  $J$  = 36.1 Hz); **HRMS m/z (ESI)** calcd for C<sub>16</sub>H<sub>16</sub>F<sub>2</sub>N<sub>2</sub> (M+H)<sup>+</sup> 275.1360, found 275.1363.

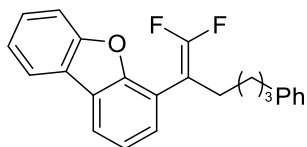

### 2-(1,1-difluoro-6-phenylhex-1-en-2-yl)dibenzo[b,d]furan

**(3ak)** : According to Method C, the reaction was carried out with alcohol **1a** (40.9 mg, 0.3 mmol), **KO<sup>t</sup>Bu** (37.0 mg, 0.33 mmol), **dry THF** (3.0 mL), **CS<sub>2</sub>** (54.1 μL, 0.9 mmol),

and then trifluoromethyl alkene **2k** (94.3 mg, 0.36 mmol), **PhPCy<sub>2</sub>** (98.8 mg, 0.36 mmol), **Acetone/MeCN** (5.4 mL/0.6 mL). The crude product was purified by flash column chromatography on silica gel (PE:EA = 10:1) to afford 75 mg (71% yield) of **3ak** as a yellow oil: **<sup>1</sup>H NMR (400 MHz, CDCl<sub>3</sub>)** δ: 8.00 (d, *J* = 7.6 Hz, 1H), 7.94 (dd, *J* = 2.3 Hz, 2.4 Hz, 1H), 7.63 (d, *J* = 8.2 Hz, 1H), 7.53-7.48 (m, 1H), 7.41-7.35 (m, 3H), 7.23 (t, *J* = 7.6 Hz, 2H), 7.18-7.11 (m, 3H), 2.69-2.64 (m, 2H), 2.57 (t, *J* = 7.8 Hz, 2H), 1.73-1.65 (m, 2H), 1.47-1.39 (m, 2H); **<sup>13</sup>C NMR (100 MHz, CDCl<sub>3</sub>)** δ: 156.0, 153.9, 153.5 (dd, *J* = 288.5 Hz, 286.1 Hz), 142.4, 128.3, 128.2, 127.8, 127.3, 125.6, 124.5, 124.1, 122.8, 122.7, 120.7, 120.0, 118.3 (d, *J* = 5.3 Hz), 111.8, 88.1 (dd, *J* = 24.9 Hz, 14.9 Hz), 35.5, 30.6, 27.3, 27.2; **<sup>19</sup>F NMR (376 MHz, CDCl<sub>3</sub>)** δ: -88.12 (d, *J* = 40.4 Hz), -91.63 (d, *J* = 40.4 Hz); **HRMS m/z (ESI)** calcd for C<sub>24</sub>H<sub>20</sub>F<sub>2</sub>O (M+Na)<sup>+</sup> 385.1380, found 385.1382.

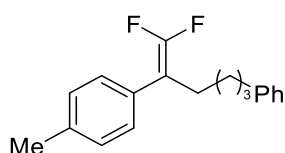

### 1-(1,1-difluoro-6-phenylhex-1-en-2-yl)-4-methylbenzene

**(3al)** : According to Method C, the reaction was carried out with alcohol **1a** (40.9 mg, 0.3 mmol), **KO<sup>t</sup>Bu** (37.0 mg, 0.33 mmol), **dry THF** (3.0 mL), **CS<sub>2</sub>** (54.1 μL, 0.9 mmol), and

then trifluoromethyl alkene **2l** (67.0 mg, 0.36 mmol), **PhPCy<sub>2</sub>** (98.8 mg, 0.36 mmol), **Acetone/MeCN** (5.4 mL/0.6 mL), **[Ir(dtbbPy)(PPy)<sub>2</sub>](PF<sub>6</sub>)** (4.1 mg, 0.0045 mmol). The crude product was purified by flash column chromatography on silica gel (PE) to afford 65 mg (76% yield) of **3al** as a colorless oil: **<sup>1</sup>H NMR (400 MHz, CDCl<sub>3</sub>)** δ: 7.29 (t, *J* = 7.7 Hz, 2H), 7.24-7.15 (m, 7H), 2.60 (t, *J* = 7.8 Hz, 2H), 2.46-2.41 (m, 2H), 2.38 (s, 3H), 1.69-1.61 (m, 2H), 1.48-1.41 (m, 2H); **<sup>13</sup>C NMR (100 MHz, CDCl<sub>3</sub>)** δ: 153.5 (dd, *J* = 287.5 Hz, 285.1 Hz), 142.4, 136.9, 130.6, 129.1, 128.3, 128.2, 128.1 (t, *J* = 3.4 Hz), 125.7, 92.0 (dd, *J* = 20.1 Hz, 14.4 Hz), 35.5, 30.7, 27.4, 27.2, 21.1; **<sup>19</sup>F NMR (376 MHz, CDCl<sub>3</sub>)** δ: -92.07, -92.10; **HRMS m/z (ESI)** calcd for C<sub>19</sub>H<sub>20</sub>F<sub>2</sub> (M+H)<sup>+</sup> 287.1611, found 287.1613.

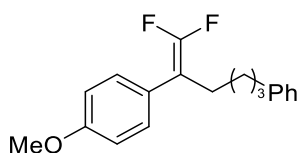

**1-(1,1-difluoro-6-phenylhex-1-en-2-yl)-4-methoxybenzene (3am)** : According to Method C, the reaction was carried out with alcohol **1a** (40.9 mg, 0.3 mmol), **KO<sup>t</sup>Bu** (37.0 mg, 0.33 mmol), **dry THF** (3.0 mL), **CS<sub>2</sub>** (54.1  $\mu$ L, 0.9 mmol), and then trifluoromethyl alkene **2m** (72.7 mg, 0.36 mmol), **PhPCy<sub>2</sub>** (98.8 mg, 0.36 mmol), **Acetone/MeCN** (5.4 mL/0.6 mL), **[Ir(dtbbPy)(PPy)<sub>2</sub>](PF<sub>6</sub>)** (4.1 mg, 0.0045 mmol). The crude product was purified by flash column chromatography on silica gel (PE) to afford 60 mg (66% yield) of **3am** as a colorless oil: **<sup>1</sup>H NMR (400 MHz, CDCl<sub>3</sub>)**  $\delta$ : 7.31-7.16 (m, 7H), 6.94-6.90 (m, 2H), 3.84(s, 3H), 2.60 (t,  $J = 7.6$  Hz, 2H), 2.44-2.40 (m, 2H), 1.69-1.61 (m, 2H), 1.48-1.40 (m, 2H); **<sup>13</sup>C NMR (100 MHz, CDCl<sub>3</sub>)**  $\delta$ : 158.6, 153.4 (t,  $J = 285.6$  Hz), 142.4, 129.3 (t,  $J = 3.4$  Hz), 128.3, 128.2, 125.8, 125.7, 113.8, 91.6 (dd,  $J = 18.7$  Hz, 15.8 Hz), 55.2, 35.5, 30.7, 27.4. 27.2; **<sup>19</sup>F NMR (376 MHz, CDCl<sub>3</sub>)**  $\delta$ : -92.59; **HRMS m/z (ESI)** calcd for C<sub>19</sub>H<sub>20</sub>F<sub>2</sub>O (M+H)<sup>+</sup> 303.1560, found 303.1562.

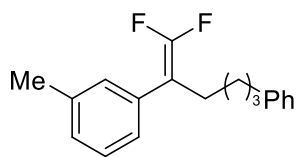

**1-(1,1-difluoro-6-phenylhex-1-en-2-yl)-3-methylbenzene (3an)**: According to Method C, the reaction was carried out with alcohol **1a** (40.9 mg, 0.3 mmol), **KO<sup>t</sup>Bu** (37.0 mg, 0.33 mmol), **dry THF** (3.0 mL), **CS<sub>2</sub>** (54.1  $\mu$ L, 0.9 mmol), and then trifluoromethyl alkene **2** (67.0 mg, 0.36 mmol), **PhPCy<sub>2</sub>** (98.8 mg, 0.36 mmol), **Acetone/MeCN** (5.4 mL/0.6 mL), **[Ir(dtbbPy)(PPy)<sub>2</sub>](PF<sub>6</sub>)** (4.1 mg, 0.0045 mmol). The crude product was purified by flash column chromatography on silica gel (PE) to afford 49 mg (57% yield) of **3an** as a colorless oil: **<sup>1</sup>H NMR (400 MHz, CDCl<sub>3</sub>)**  $\delta$ : 7.30-7.23 (m, 3H), 7.23-7.18 (m, 1H), 7.15-7.08 (m, 5H), 2.58 (t,  $J = 7.9$  Hz, 2H), 2.44-2.36 (m, 5H), 1.67-1.60 (m, 2H), 1.46-1.38 (m, 2H); **<sup>13</sup>C NMR (100 MHz, CDCl<sub>3</sub>)**  $\delta$ : 153.5 (dd,  $J = 288.5$  Hz, 284.6 Hz), 142.4, 138.0, 133.6 (t,  $J = 2.4$  Hz), 128.9 (t,  $J = 2.9$  Hz), 128.3, 128.2, 128.0, 125.7, 125.3 (t,  $J = 2.9$  Hz), 92.3 (dd,  $J = 21.1$  Hz, 13.4 Hz), 35.5, 30.7, 27.5, 27.2, 21.4; **<sup>19</sup>F NMR (376 MHz, CDCl<sub>3</sub>)**  $\delta$ : -91.72 (d,  $J = 44.8$  Hz), -91.95 (d,  $J = 46.2$  Hz); **HRMS m/z (ESI)** calcd for C<sub>19</sub>H<sub>20</sub>F<sub>2</sub>Na (M+Na)<sup>+</sup> 309.1431, found 309.1433.

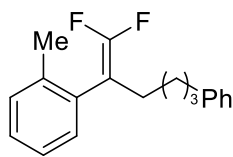

**1-(1,1-difluoro-4-phenylbut-1-en-2-yl)-2-methylbenzene (3ao):**

According to Method C, the reaction was carried out with alcohol **1a** (40.9 mg, 0.3 mmol), **KO<sup>t</sup>Bu** (37.0 mg, 0.33 mmol), **dry THF** (3.0 mL), **CS<sub>2</sub>** (54.1 μL, 0.9 mmol), and then trifluoromethyl alkene **2** (67.0 mg, 0.36 mmol), **PhPCy<sub>2</sub>** (98.8 mg, 0.36 mmol), **Acetone/MeCN** (5.4 mL/0.6 mL), **[Ir(dtbbPy)(PPy)<sub>2</sub>](PF<sub>6</sub>)** (4.1 mg, 0.0045 mmol). The crude product was purified by flash column chromatography on silica gel (PE) to afford 31 mg (36% yield) of **3ao** as a colorless oil: <sup>1</sup>H NMR (400 MHz, CDCl<sub>3</sub>) δ: 7.30-7.14 (m, 8H), 7.11-7.09 (d, *J* = 7.8 Hz, 1H), 7.15-7.08 (m, 5H), 2.59 (t, *J* = 7.9 Hz, 2H), 2.36-2.28 (m, 5H), 1.68-1.61 (m, 2H), 1.44-1.36 (m, 2H); <sup>13</sup>C NMR (100 MHz, CDCl<sub>3</sub>) δ: 152.5 (dd, *J* = 286.5 Hz, 285.1 Hz), 142.4, 136.8, 133.2, 130.2, 129.6, 128.3, 128.2, 125.7, 90.9 (dd, *J* = 21.1 Hz, 17.3 Hz), 35.6, 31.7, 28.7, 27.0, 19.4; <sup>19</sup>F NMR (376 MHz, CDCl<sub>3</sub>) δ: -89.83 (d, *J* = 47.7 Hz), -94.69 (d, *J* = 46.2 Hz); HRMS *m/z* (ESI) calcd for C<sub>19</sub>H<sub>20</sub>F<sub>2</sub>Na (M+Na)<sup>+</sup> 309.1431, found 309.1430.

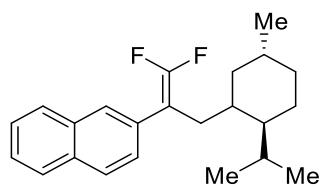

**2-(1,1-difluoro-3-((2S,5S)-2-isopropyl-5-methylcyclohexyl)prop-1-en-2-yl)naphthalene (3aq) :**

According to Method C, the reaction was carried out with alcohol **1ab** (31.3 mg, 0.2 mmol), **KO<sup>t</sup>Bu** (24.7 mg, 0.22 mmol), **dry THF** (2.0 mL), **CS<sub>2</sub>** (36.0 μL, 0.6 mmol), and then trifluoromethyl alkene **2a** (53.3 mg, 0.24 mmol), **PhPCy<sub>2</sub>** (65.9 mg, 0.24 mmol), **Acetone/MeCN** (3.6 mL/0.4 mL). The crude product was purified by flash column chromatography on silica gel (PE) to afford 52 mg (76% yield, dr = 3:1) of **3aq** as a colorless oil. Data of one isomer: <sup>1</sup>H NMR (400 MHz, CDCl<sub>3</sub>) δ: 7.87-7.79 (m, 4H), 7.5-7.44 (m, 3H), 2.93-2.87 (m, 1H), 2.16-2.05 (m, 1H), 1.83-1.58 (m, 3H), 1.31-1.08 (m, 2H), 1.02-0.94 (m, 1H), 0.92-0.89 (m, 3H), 0.86 (d, *J* = 6.5 Hz, 3H), 0.82-0.72 (m, 3H), 0.67 (d, *J* = 6.8 Hz, 2H), 0.64-0.56 (m, 2H); <sup>13</sup>C NMR (100 MHz, CDCl<sub>3</sub>) δ: 154.1 (dd, *J* = 288.5 Hz, 284.6 Hz), 133.3, 132.4, 131.3 (t, *J* = 3.8 Hz), 127.9, 127.6, 127.3 (t, *J* = 3.4 Hz), 126.2, 126.0, 91.4 (dd, *J* = 21.1 Hz, 13.4 Hz), 47.6, 40.5, 36.8, 35.2, 32.4, 31.2, 26.6, 24.1, 22.8, 21.5, 15.2; <sup>19</sup>F NMR (376 MHz, CDCl<sub>3</sub>) δ: -91.01 (d, *J* = 43.3 Hz), -91.25 (d, *J* = 43.3 Hz). Data of the other isomer: <sup>1</sup>H NMR (400 MHz, CDCl<sub>3</sub>) δ: 7.87-7.79 (m, 4H), 7.5-7.44 (m, 3H), 2.93-2.87 (m, 1H), 2.16-2.05 (m, 1H), 1.83-1.58 (m, 3H), 1.31-1.08 (m, 2H), 1.02-0.94 (m, 1H), 0.92-0.89 (m, 3H), 0.86 (d, *J* = 6.5 Hz, 3H),



0.82-0.72 (m, 3H), 0.67 (d,  $J = 6.8$  Hz, 2H), 0.64-0.56 (m, 2H);  $^{13}\text{C}$  NMR (100 MHz,  $\text{CDCl}_3$ )  $\delta$ : 154.0 (dd,  $J = 288.5$  Hz, 284.6 Hz), 133.2, 132.5, 127.8, 127.6, 126.3, 91.8 (dd,  $J = 22.0$  Hz, 13.6 Hz), 45.0, 37.8, 35.8, 32.8, 29.3, 26.0, 25.1, 23.7, 21.7, 20.6;  $^{19}\text{F}$  NMR (376 MHz,  $\text{CDCl}_3$ )  $\delta$ : -91.88 (d,  $J = 44.8$  Hz), -92.24 (d,  $J = 44.8$  Hz); HRMS  $m/z$  (ESI) calcd for  $\text{C}_{23}\text{H}_{28}\text{F}_2$  ( $\text{M}+\text{H}$ ) $^+$  343.2237, found 343.2239.

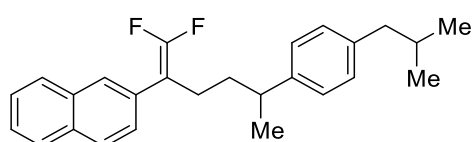

**(S)-2-(1,1-difluoro-5-(4-isobutylphenyl)hex-1-en-2-yl)naphthalene (3ar)** : According to Method C, the reaction was carried out with alcohol **1ac** (38.4 mg, 0.2 mmol), **KO<sup>t</sup>Bu** (24.7 mg, 0.22 mmol), **dry THF** (2.0 mL), **CS<sub>2</sub>** (36.0  $\mu\text{L}$ , 0.6 mmol), and then trifluoromethyl alkene **2a** (53.3 mg, 0.24 mmol), **PhPCy<sub>2</sub>** (65.9 mg, 0.24 mmol), **Acetone/MeCN** (3.6 mL/0.4 mL). The crude product was purified by flash column chromatography on silica gel (PE) to afford 56 mg (74% yield) of **3ar** as a colorless oil:  $^1\text{H}$  NMR (400 MHz,  $\text{CDCl}_3$ )  $\delta$ : 7.86-7.79 (m, 3H), 7.68 (s, 1H), 7.53-7.48 (m, 2H), 7.40 (tt,  $J = 1.7$  Hz, 1.8 Hz, 1H), 7.08 (d,  $J = 4.7$  Hz, 4H), 2.74-2.69 (m, 1H), 2.49 (d,  $J = 7.2$  Hz, 3H), 2.45-2.35 (m, 2H), 1.92-1.86 (m, 1H), 1.73-1.66 (m, 2H), 1.24 (d,  $J = 7.0$  Hz, 3H), 0.95 (d,  $J = 6.5$  Hz, 6H);  $^{13}\text{C}$  NMR (100 MHz,  $\text{CDCl}_3$ )  $\delta$ : 153.6 (dd,  $J = 289.4$  Hz, 285.6 Hz), 144.0, 139.3, 133.2, 132.4, 131.0 (t,  $J = 3.8$  Hz), 129.1, 127.9, 127.5, 127.1 (t,  $J = 3.4$  Hz), 126.7, 126.2, 126.1 (t,  $J = 3.4$  Hz), 126.0, 92.5 (dd,  $J = 21.6$  Hz, 12.5 Hz), 45.0, 39.2, 36.3, 30.2, 25.8, 22.4, 22.3;  $^{19}\text{F}$  NMR (376 MHz,  $\text{CDCl}_3$ )  $\delta$ : -90.78 (d,  $J = 41.9$  Hz), -91.29 (d,  $J = 43.3$  Hz); HRMS  $m/z$  (ESI) calcd for  $\text{C}_{26}\text{H}_{28}\text{F}_2$  ( $\text{M}+\text{H}$ ) $^+$  379.2237, found 379.2240.

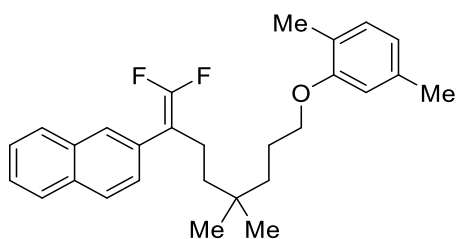

**2-(8-(2,5-dimethylphenoxy)-1,1-difluoro-5,5-dimethyloct-1-en-2-yl)naphthalene (3as)** : According to Method C, the reaction was carried out with alcohol **1ad** (47.2 mg, 0.2 mmol), **KO<sup>t</sup>Bu** (24.7 mg, 0.22 mmol), **dry THF** (2.0 mL), **CS<sub>2</sub>** (36.0  $\mu\text{L}$ , 0.6 mmol), and then trifluoromethyl alkene **2a** (53.3 mg, 0.24 mmol), **PhPCy<sub>2</sub>** (65.9 mg, 0.24 mmol), **Acetone/MeCN** (3.6 mL/0.4 mL). The crude product was purified by flash column chromatography on silica gel (PE) to afford 40

mg (47% yield) of **3as** as a colorless oil:  $^1\text{H NMR}$  (400 MHz,  $\text{CDCl}_3$ )  $\delta$ : 7.87-7.80 (m, 4H), 7.52-7.46 (m, 3H), 7.05 (d,  $J = 7.4$  Hz, 1H), 6.70-6.65 (m, 2H), 3.93 (t,  $J = 6.3$  Hz, 2H), 2.53-2.47 (m, 2H), 2.34 (s, 3H), 2.21 (s, 3H), 1.76-1.68 (m, 2H), 1.44-1.35 (m, 4H), 0.94 (s, 6H);  $^{13}\text{C NMR}$  (100 MHz,  $\text{CDCl}_3$ )  $\delta$ : 157.1, 153.5 (dd,  $J = 288.9$  Hz, 285.6 Hz), 136.4, 133.3, 132.4, 131.2 (t,  $J = 3.4$  Hz), 130.3, 128.0, 127.9, 127.6, 127.1 (t,  $J = 3.4$  Hz), 126.2, 126.0, 126.0 (t,  $J = 3.4$  Hz), 123.5, 120.6, 111.9, 93.1 (dd,  $J = 21.1$  Hz, 12.9 Hz), 68.4, 39.8, 37.6, 32.5, 27.0, 24.2, 22.6, 21.4, 15.8;  $^{19}\text{F NMR}$  (376 MHz,  $\text{CDCl}_3$ )  $\delta$ : -91.32 (d,  $J = 43.3$  Hz), -91.54 (d,  $J = 43.4$  Hz); **HRMS**  $m/z$  (ESI) calcd for  $\text{C}_{28}\text{H}_{32}\text{F}_2\text{O}$  ( $\text{M}+\text{H}$ ) $^+$  423.2499, found 423.2498.

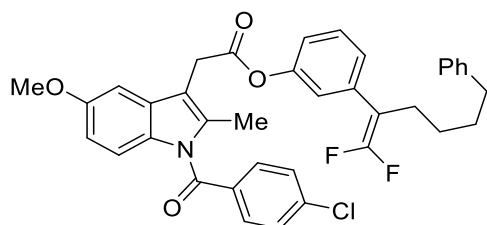

**3-(1,1-difluoro-6-phenylhex-1-en-2-yl)phenyl-2-(1-(4-chlorobenzoyl)-5-methoxy-2-methyl-1H-indol-3-yl)acetate (3at)** : According to Method C, the reaction was carried out with alcohol **1a** (27.2 mg, 0.2 mmol), **KO<sup>t</sup>Bu** (24.7

mg, 0.22 mmol), **dry THF** (2.0 mL), **CS<sub>2</sub>** (36.0  $\mu\text{L}$ , 0.6 mmol), and then trifluoromethyl alkene **2q** (126.5 mg, 0.24 mmol), **PhPCy<sub>2</sub>** (65.9 mg, 0.24 mmol), **Acetone/MeCN** (3.6 mL/0.4 mL). The crude product was purified by flash column chromatography on silica gel (PE:EA = 5:1) to afford 83 mg (66% yield) of **3at** as a green oil:  $^1\text{H NMR}$  (400 MHz,  $\text{CDCl}_3$ )  $\delta$ : 7.70 (d,  $J = 8.6$  Hz, 2H), 7.49 (d,  $J = 8.6$  Hz, 2H), 7.36-7.30 (m, 1H), 7.28-7.24 (m, 2H), 7.19-7.12 (m, 4H), 7.08-6.99 (m, 3H), 6.92 (d,  $J = 9.0$  Hz, 1H), 6.72 (d,  $J = 2.6$  Hz, 1H), 3.93 (s, 2H), 3.84 (s, 3H), 2.57 (t,  $J = 7.8$  Hz, 2H), 2.47 (s, 3H), 2.43-2.38 (m, 2H), 1.66-1.58 (m, 2H), 1.45-1.38 (m, 2H);  $^{13}\text{C NMR}$  (100 MHz,  $\text{CDCl}_3$ )  $\delta$ : 169.2, 168.3, 156.1, 153.7 (dd,  $J = 291.2$  Hz, 286.5 Hz), 150.7, 142.3, 139.3, 136.2, 135.2, 133.8, 131.2, 130.8, 130.5, 129.3, 129.1, 128.3, 128.2, 125.8, 125.7, 121.2 (t,  $J = 3.8$  Hz), 120.2, 115.0, 111.9, 111.8, 101.2, 91.7 (dd,  $J = 20.6$  Hz, 13.9 Hz), 55.1, 35.4, 30.6, 30.5, 27.2, 13.4;  $^{19}\text{F NMR}$  (376 MHz,  $\text{CDCl}_3$ )  $\delta$ : -90.33, -90.36; **HRMS**  $m/z$  (ESI) calcd for  $\text{C}_{37}\text{H}_{32}\text{ClF}_2\text{NO}_4$  ( $\text{M}+\text{H}$ ) $^+$  628.2066, found 628.2062.

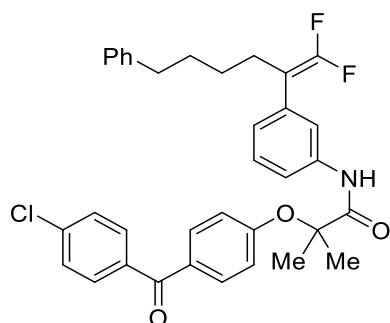

**2-(4-(4-chlorobenzoyl)phenoxy)-N-(3-(1,1-difluoro-6-phenylhex-1-en-2-yl)phenyl)-2-methylpropanamide (3au)** : According to Method C, the reaction was carried out with alcohol **1a** (27.2 mg, 0.2 mmol), **KO<sup>t</sup>Bu** (24.7 mg, 0.22 mmol), **dry THF** (2.0 mL), **CS<sub>2</sub>** (36.0  $\mu$ L, 0.6 mmol), and then trifluoromethyl alkene **2r** (120.0 mg, 0.24 mmol), **PhPCy<sub>2</sub>** (65.9 mg, 0.24 mmol), **Acetone/MeCN** (3.6 mL/0.4 mL). The crude product was purified by flash column chromatography on silica gel (PE:EA = 5:1) to afford 90 mg (79% yield) of **3au** as a green solid: **<sup>1</sup>H NMR (400 MHz, CDCl<sub>3</sub>)**  $\delta$ : 8.32 (s, 1H), 7.77 (dd,  $J$  = 8.8 Hz, 8.7 Hz, 4H), 7.51-7.44 (m, 4H), 7.32 (t,  $J$  = 8.0 Hz, 1H), 7.27-7.23 (m, 2H), 7.17-7.11 (m, 3H), 7.08 (d,  $J$  = 8.8 Hz, 3H), 2.57 (t,  $J$  = 7.8 Hz, 2H), 2.44-2.39 (m, 2H), 1.69 (s, 6H), 1.66-1.58 (m, 2H), 1.45-1.38 (m, 2H); **<sup>13</sup>C NMR (100 MHz, CDCl<sub>3</sub>)**  $\delta$ : 194.1, 172.2, 158.1, 153.6 (dd,  $J$  = 289.0 Hz, 285.6 Hz), 142.3, 138.7, 137.4, 135.9, 134.7 (t,  $J$  = 2.9 Hz), 132.1, 131.9, 131.2, 129.1, 128.6, 128.3, 128.2, 125.6, 124.6 (t,  $J$  = 3.4 Hz), 120.2, 119.7 (t,  $J$  = 3.4 Hz), 118.8, 92.0 (dd,  $J$  = 22.0 Hz, 12.9 Hz), 82.4, 35.4, 3.6, 27.3, 27.1, 25.0; **<sup>19</sup>F NMR (376 MHz, CDCl<sub>3</sub>)**  $\delta$ : -90.94 (d,  $J$  = 43.4 Hz), -91.19 (d,  $J$  = 43.3 Hz); **HRMS m/z (ESI)** calcd for C<sub>35</sub>H<sub>32</sub>ClF<sub>2</sub>NO<sub>3</sub> (M+H)<sup>+</sup> 588.2117, found 588.2114.

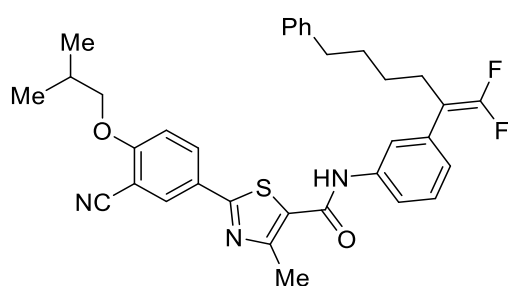

**2-(3-cyano-4-isobutoxyphenyl)-N-(3-(1,1-difluoro-6-phenylhex-1-en-2-yl)phenyl)-4-methylthiazole-5-carboxamide (3av)** : According to Method C, the reaction was carried out with alcohol **1a** (27.2 mg, 0.2 mmol), **KO<sup>t</sup>Bu** (24.7 mg, 0.22 mmol), **dry THF** (2.0 mL), **CS<sub>2</sub>** (36.0  $\mu$ L, 0.6 mmol), and then trifluoromethyl alkene **2s** (116.4 mg, 0.24 mmol), **PhPCy<sub>2</sub>** (65.9 mg, 0.24 mmol), **Acetone/MeCN** (3.6 mL/0.4 mL). The crude product was purified by flash column chromatography on silica gel (PE:EA = 3:1) to afford 70 mg (60% yield) of **3av** as a yellow solid: **<sup>1</sup>H NMR (400 MHz, CDCl<sub>3</sub>)**  $\delta$ : 8.12 (d,  $J$  = 2.3 Hz, 1H), 8.06 (dd,  $J$  = 2.4 Hz, 2.5 Hz, 1H), 7.64 (s, 1H), 7.54 (d,  $J$  = 6.6 Hz, 2H), 7.35 (t,  $J$  = 8.8 Hz, 1H), 7.26 (t,  $J$  = 7.6 Hz, 2H), 7.18-7.09 (m, 4H), 7.02 (d,  $J$  = 8.9 Hz, 1H), 3.90 (d,  $J$  = 6.5 Hz, 2H), 2.78 (s, 3H), 2.58 (t,  $J$  =

7.8 Hz, 2H), 2.46-2.41 (m, 2H), 2.23-2.16 (m, 1H), 1.67-1.59 (m, 3H), 1.47-1.39 (m, 2H), 1.10 (d,  $J = 6.8$  Hz, 6H);  $^{13}\text{C}$  NMR (100 MHz,  $\text{CDCl}_3$ )  $\delta$ : 164.9, 162.4, 159.8, 157.1, 153.6 (dd,  $J = 288.9$  Hz, 285.6 Hz), 142.3, 137.5, 134.8, 132.5, 131.9, 129.2, 128.3, 128.2, 125.7, 125.6, 124.9, 120.1, 119.3, 115.4, 112.6, 102.8, 92.0 (dd,  $J = 22.1$  Hz, 12.9 Hz), 75.7, 35.4, 30.6, 28.1, 27.3, 27.2, 19.0, 17.5;  $^{19}\text{F}$  NMR (376 MHz,  $\text{CDCl}_3$ )  $\delta$ : -90.78 (d,  $J = 43.3$  Hz), -91.03 (d,  $J = 41.9$  Hz); HRMS  $m/z$  (ESI) calcd for  $\text{C}_{34}\text{H}_{33}\text{F}_2\text{N}_3\text{O}_2\text{S}$  ( $\text{M}+\text{H}$ ) $^+$  586.2340, found 586.2343.

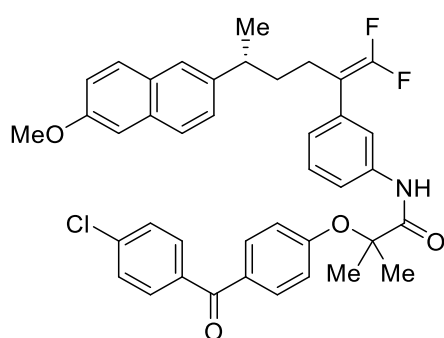

**(R)-2-(4-(4-chlorobenzoyl)phenoxy)-N-(3-(1,1-difluoro-5-(6-methoxynaphthalen-2-yl)hex-1-en-2-yl)phenyl)-2-methylpropanamide (3aw) :**

According to Method C, the reaction was carried out with alcohol **1ae** (43.2 mg, 0.2 mmol), **KO<sup>t</sup>Bu** (24.7 mg, 0.22 mmol), **dry THF** (2.0 mL), **CS<sub>2</sub>** (36.0  $\mu\text{L}$ , 0.6 mmol), and then trifluoromethyl alkene **2r** (120.0 mg, 0.24 mmol), **PhPCy<sub>2</sub>** (65.9 mg, 0.24 mmol), **Acetone/MeCN** (3.6 mL/0.4 mL). The crude product was purified by flash column chromatography on silica gel (PE:EA = 10:1) to afford 47 mg (35% yield) of **3aw** as a colorless oil:  $^1\text{H}$  NMR (400 MHz,  $\text{CDCl}_3$ )  $\delta$ : 8.30 (s, 1H), 7.78 (d,  $J = 8.8$  Hz, 2H), 7.72 (d,  $J = 8.5$  Hz, 2H), 7.66 (dd,  $J = 2.5$  Hz, 2.6 Hz, 2H), 7.50-7.43 (m, 5H), 7.29 (t,  $J = 7.9$  Hz, 1H), 7.25 (dd,  $J = 1.8$  Hz, 1.8 Hz, 1H), 7.13-7.05 (m, 4H), 7.00 (d,  $J = 8.1$  Hz, 1H), 3.90 (s, 3H), 2.84-2.79 (m, 1H), 2.38-2.23 (m, 2H), 1.77-1.70 (m, 2H), 1.68 (s, 6H), 1.28 (d,  $J = 7.0$  Hz, 3H);  $^{13}\text{C}$  NMR (100 MHz,  $\text{CDCl}_3$ )  $\delta$ : 194.2, 172.2, 158.1, 157.2, 156.3, 153.4 (t,  $J = 287.0$  Hz), 141.8, 138.7, 137.4, 135.9, 134.7, 133.2, 132.2, 132.0, 131.2, 129.1, 129.0, 128.6, 126.9, 126.0, 125.1, 124.5, 120.2, 119.7 (t,  $J = 3.4$  Hz), 118.8, 118.6, 105.6, 92.1 (t,  $J = 17.3$  Hz), 82.4, 55.3, 39.4, 36.0, 25.9, 25.0, 22.0;  $^{19}\text{F}$  NMR (376 MHz,  $\text{CDCl}_3$ )  $\delta$ : -90.77; HRMS  $m/z$  (ESI) calcd for  $\text{C}_{40}\text{H}_{36}\text{ClF}_2\text{NO}_4$  ( $\text{M}+\text{H}$ ) $^+$  668.2379, found 668.2377.

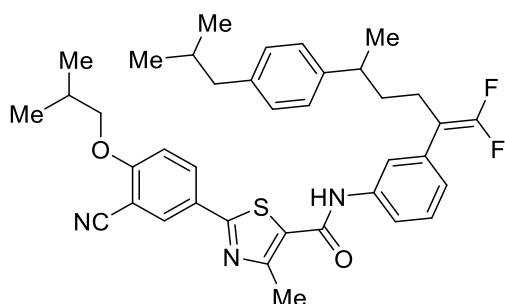

**(R)-2-(3-cyano-4-isobutoxyphenyl)-N-(3-(1,1-difluoro-5-(4-isobutylphenyl)hex-1-en-2-yl)phenyl)-4-methylthiazole-5-carboxamide (3ax)** : According to Method C, the reaction was carried out with alcohol **1ac** (38.4 mg, 0.2 mmol), **KO<sup>t</sup>Bu** (24.7 mg, 0.22 mmol), **dry THF** (2.0 mL), **CS<sub>2</sub>** (36.0

$\mu\text{L}$ , 0.6 mmol), and then trifluoromethyl alkene **2s** (116.4 mg, 0.24 mmol), **PhPCy<sub>2</sub>** (65.9 mg, 0.24 mmol), **Acetone/MeCN** (3.6 mL/0.4 mL). The crude product was purified by flash column chromatography on silica gel (PE:EA = 5:1) to afford 58 mg (45% yield) of **3ax** as a white solid: **<sup>1</sup>H NMR (400 MHz, CDCl<sub>3</sub>)**  $\delta$ : 8.12 (m, 2H), 7.64-7.53 (m, 2H), 7.44 (s, 1H), 7.32 (t,  $J = 8.0$  Hz, 1H), 7.04-7.00 (m, 6H), 3.91 (d,  $J = 6.5$  Hz, 2H), 2.78 (s, 3H), 2.68-2.63 (m, 1H), 2.42 (d,  $J = 7.2$  Hz, 2H), 2.36-2.17 (m, 3H), 1.86-1.79 (m, 1H), 1.67-1.60 (m, 2H), 1.22 (d,  $J = 6.9$  Hz, 3H), 1.10 (d,  $J = 6.8$  Hz, 6H), 0.89 (d,  $J = 6.6$  Hz, 6H); **<sup>13</sup>C NMR (100 MHz, CDCl<sub>3</sub>)**  $\delta$ : 164.9, 162.5, 159.7, 156.9, 153.4 (t,  $J = 287.0$  Hz), 143.9, 139.3, 137.5, 134.7, 132.5, 131.9, 129.1, 129.0, 126.6, 125.7, 125.6, 124.8, 120.1, 119.2, 115.4, 112.6, 102.9, 92.1 (dd,  $J = 18.7$  Hz, 15.8 Hz), 45.0, 39.1, 36.2, 30.2, 28.1, 25.7, 22.3, 22.2, 19.0, 17.5; **<sup>19</sup>F NMR (376 MHz, CDCl<sub>3</sub>)**  $\delta$ : -90.66; **HRMS m/z (ESI)** calcd for C<sub>38</sub>H<sub>41</sub>F<sub>2</sub>N<sub>3</sub>O<sub>2</sub>S (M+H)<sup>+</sup> 642.2966, found 642.2964.

## 6. Gram Scale Reaction

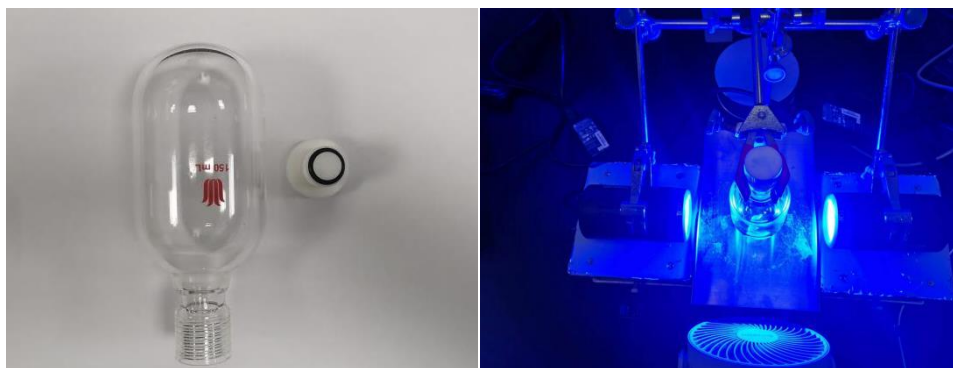

**Figure S2.** An over-dried 150 mL pressure tubing (left). Photoreaction setup (right).

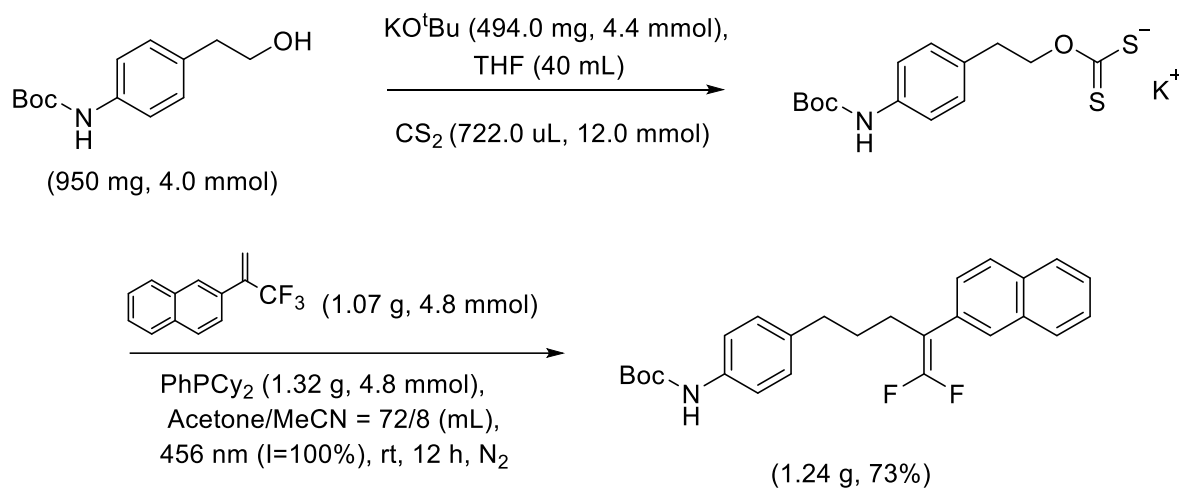

In a N<sub>2</sub>-filled glovebox, an oven-dried 150.0 mL pressure tubing equipped with a magnetic stir bar was charged sequentially with alcohol **1c** (950 mg, 4.0 mmol), **KO<sup>t</sup>Bu** (494.0 mg, 4.4 mmol), and **dry THF** (40.0 mL). After being sealed with a septum cap and transferred out of the glovebox, the reaction mixture was stirred at room temperature for 30 minutes, followed by the addition of **CS<sub>2</sub>** (722.0 μL, 12.0 mmol) via microsyringe at 0°C and continued to be stirred for 3 hours at 0°C before removing the solvent in vacuo. The system was transferred into the glovebox, then **2a** (1.07 g, 4.8 mmol), **PhPCy<sub>2</sub>** (1.32 g, 4.8 mmol), and the mixed solvents of **Acetone/MeCN** (72 mL/8 mL) were added. The vial was sealed with a septum cap and transferred out of the glovebox. The reaction mixture was stirred at room temperature under blue LEDs (456 nm, the light intensity is 100%) irradiation for 12 h (the reaction tube placed approximately ~ 6 cm from the bulbs and using a fan to keep at room temperature). The solvent was removed in vacuo and the residue was

purified by flash column chromatography on silica gel (PE:EA = 20:1) to afford 1.24 g (73% yield) of **3c**.

## 7. Cyclic voltammetry of **2l** and **2m**

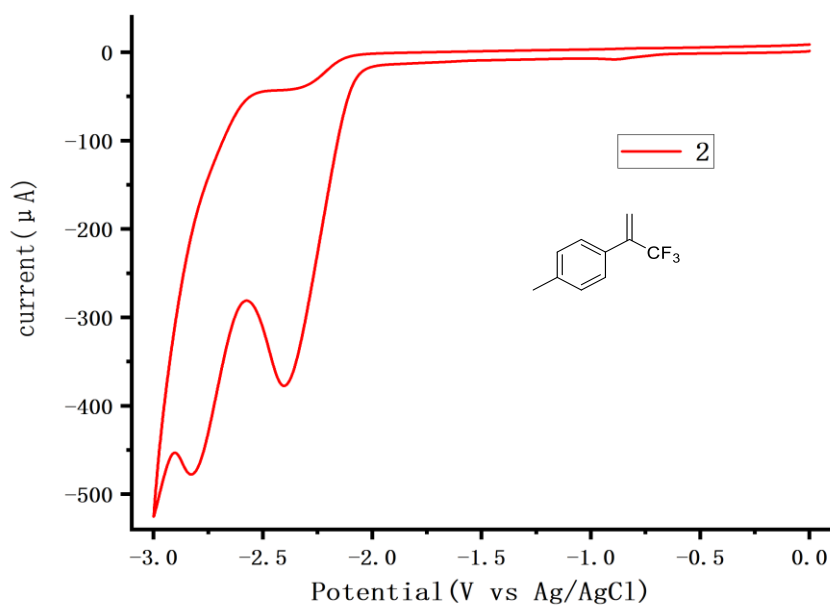

**Figure S3.** Cyclic voltammetry of 1-methyl-4-(3,3,3-trifluoroprop-1-en-2-yl)benzene

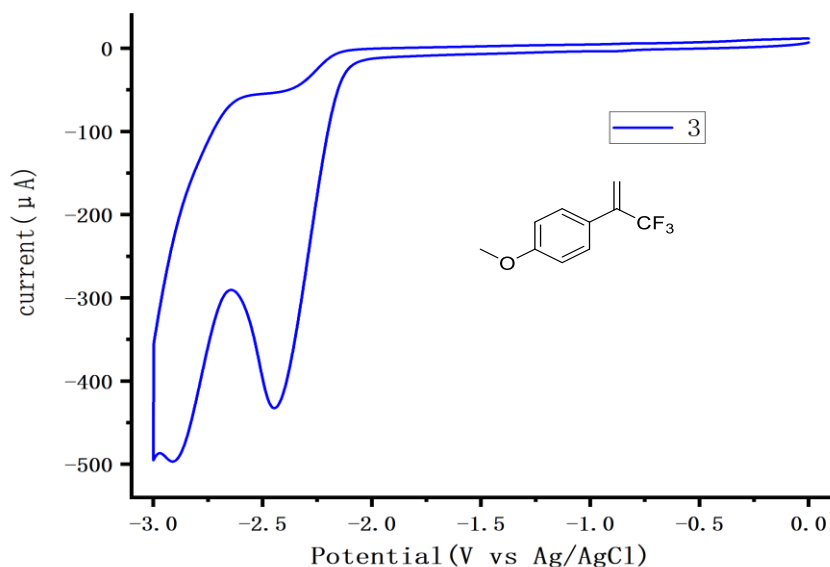

**Figure S4.** Cyclic voltammetry of  
1-methoxy-4-(3,3,3-trifluoroprop-1-en-2-yl)benzene

Cyclic voltammetry of alkenes in DMF. Test conditions: A cyclic voltammograms in solvent (10 mL) by using glassy carbon as the working electrode, Pt wire as the counter electrode and Ag/AgCl as the reference electrode under N<sub>2</sub> at room temperature. 10 mL of DMF containing 0.1 M TEAB was poured into the electrochemical cell in all experiments. The scan rate is 0.1 V/s. The reduction potential of 1-methyl-4-(3,3,3-trifluoroprop-1-en-2-yl)benzene was observed at -2.41 V. The reduction potential of 1-methoxy-4-(3,3,3-trifluoroprop-1-en-2-yl)benzene was observed at -2.45 V.



## 8. Mechanistic Studies

### Radical trapping experiment

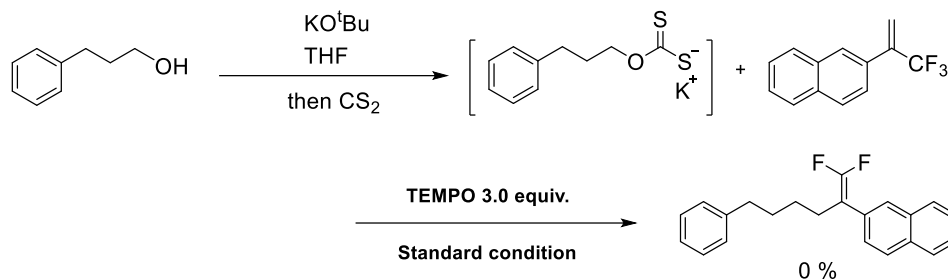

In a nitrogen-filled glovebox, over-dried 20.0 mL vial with a stirring bar was added, with alcohol **1a** (27.2 mg, 0.2 mmol), **KO<sup>t</sup>Bu** (24.7 mg, 0.22 mmol), and **dry THF** (2.0 mL). After being sealed with a septum cap and transferred out of the glovebox, the reaction mixture was stirred at room temperature for 30 minutes, followed by the addition of **CS<sub>2</sub>** (36.1  $\mu$ L, 0.6 mmol) via microsyringe at 0°C and continued to be stirred for 3 hours at 0°C before removing the solvent in vacuo. The system was transferred into the glovebox, then the reaction bottle was added **olefin 2a** (53.3 mg, 0.24 mmol), **PhPCy<sub>2</sub>** (65.9 mg, 0.24 mmol), **TEMPO** (93.8 mg, 0.6 mmol) and **Acetone/MeCN** = 3.6/0.4 (mL). The resulting mixture was stirred at room temperature under blue LEDs ( $\lambda$  = 456 nm, I = 25%) irradiation for 12 h. After this time, the reaction mixture was concentrated under reduced pressure. The yield of **3a** was 0% determined by <sup>19</sup>F NMR using 1, 4-Difluorobenzene as an internal standard.

### Radical clock experiment

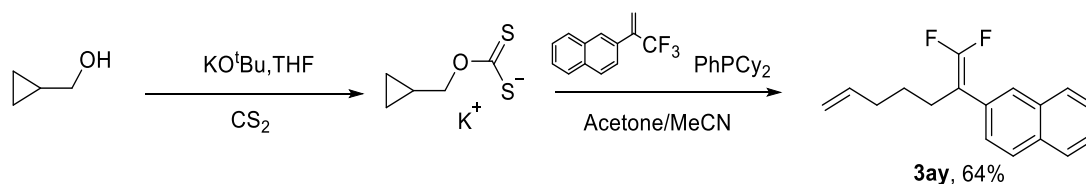

In a N<sub>2</sub>-filled glovebox, an oven-dried 20 mL glass vial equipped with a magnetic stir bar was charged sequentially with **cyclopropylmethanol** (21.6 mg, 0.3 mmol), **KO<sup>t</sup>Bu** (37.0 mg, 0.33 mmol), and **dry THF** (3.0 mL). After being sealed with a septum cap and transferred out of the glovebox, the reaction mixture was stirred at room temperature for 30 minutes, followed by the addition of **CS<sub>2</sub>** (54.1  $\mu$ L, 0.9 mmol) via microsyringe at 0°C and continued to be stirred for 3 hours at 0°C before

removing the solvent in vacuo. The system was transferred into the glovebox, then **2a** (80.0 mg, 0.36 mmol), **PhPCy<sub>2</sub>** (98.8 mg, 0.36 mmol), and the mixed solvents of **Acetone/MeCN** (5.4 mL/0.6 mL) were added. The resulting mixture was stirred at room temperature under blue LEDs ( $\lambda = 456$  nm, I = 25%) irradiation for 12 h. The solvent was removed in vacuo and the residue was purified by flash column chromatography on silica gel (PE) to afford 50 mg (64% yield) of **3ay** as a colorless oil. **<sup>1</sup>H NMR (400 MHz, CDCl<sub>3</sub>)**  $\delta$ : 7.86-7.79 (m, 4H), 7.53-7.45 (m, 3H), 5.84-5.74 (m, 1H), 5.05-4.96 (m, 2H), 2.57-2.52 (m, 2H), 2.11 (q,  $J = 7.1$  Hz, 2H), 1.56-1.49 (m, 2H); **<sup>13</sup>C NMR (100 MHz, CDCl<sub>3</sub>)**  $\delta$ : 153.8 (dd,  $J = 288.9$  Hz, 285.6 Hz), 138.1, 133.3, 132.4, 131.1 (t,  $J = 3.4$  Hz), 128.0, 127.9, 127.6, 127.3 (t,  $J = 3.4$  Hz), 126.2, 126.1 (t,  $J = 2.9$  Hz), 126.1, 114.9, 92.4 (dd,  $J = 21.6$  Hz, 12.9 Hz), 33.0, 27.1, 27.0; **<sup>19</sup>F NMR (376 MHz, CDCl<sub>3</sub>)**  $\delta$ : -91.05 (d,  $J = 43.3$  Hz), -91.33 (d,  $J = 43.3$  Hz). All data are in accordance with the literature.<sup>10</sup>

### Byproduct

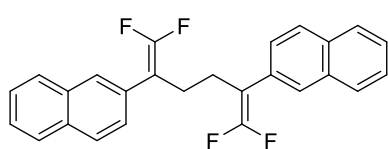

**2,2'-(1,1,6,6-tetrafluorohexa-1,5-diene-2,5-diyl)dinaphthalene (3a'')**: White solid. **<sup>1</sup>H NMR (400 MHz, CDCl<sub>3</sub>)**  $\delta$ : 7.82 (dd,  $J = 7.0$  Hz, 8.6 Hz, 4H), 7.67 (d,  $J = 7.1$  Hz, 2H), 7.57 (s, 2H), 7.50-7.46 (m, 4H), 7.34 (d,  $J = 8.6$  Hz, 2H), 2.62 (s, 4H); **<sup>13</sup>C NMR (100 MHz, CDCl<sub>3</sub>)**  $\delta$ : 153.9 (dd,  $J = 289.9$  Hz, 286.6 Hz), 133.2, 132.4, 130.4, 128.0, 127.9, 127.6, 127.3, 126.3, 126.2, 126.0, 91.7 (dd,  $J = 21.6$  Hz, 13.4 Hz), 26.3; **<sup>19</sup>F NMR (376 MHz, CDCl<sub>3</sub>)**  $\delta$ : -89.97 (d,  $J = 40.5$  Hz), -90.63 (d,  $J = 40.5$  Hz); **HRMS m/z (ESI)** calcd for C<sub>26</sub>H<sub>18</sub>F<sub>4</sub> (M+H)<sup>+</sup> 407.1423, found 407.1421.

## UV-Vis Absorption Spectra

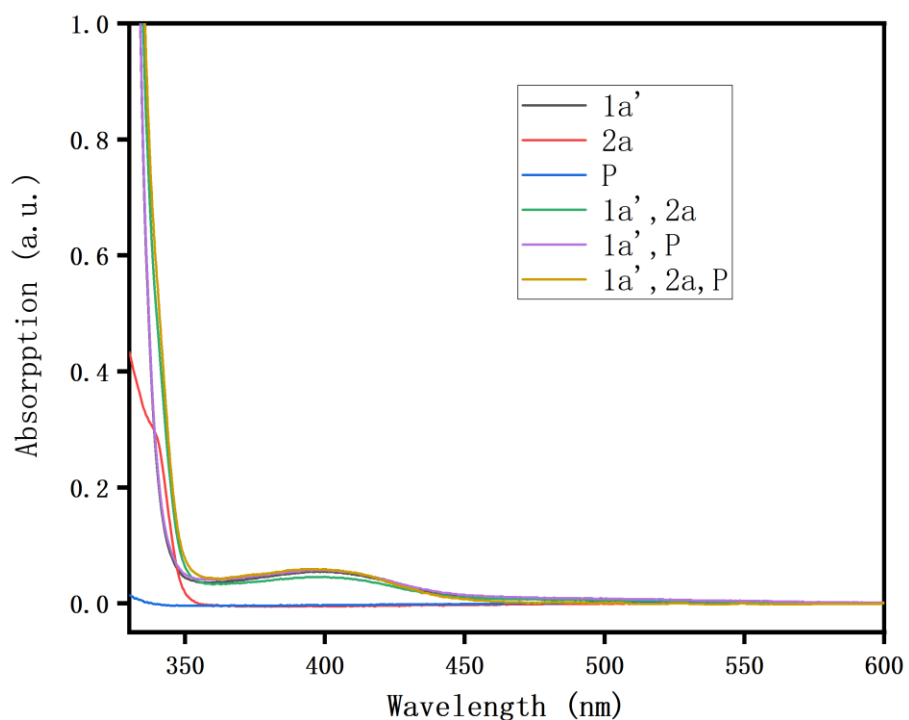

**Figure S5.** UV/Vis absorption spectra of single reaction component and combined ones

The UV-Vis absorption spectra of all solution were introduced to a 1 cm path length quartz cuvette and analyzed using a Shimadzu UV/Vis spectrophotometer UV-3600plus. **1a'**:  $10^{-3}$  M in **Acetone/MeCN**. Olefin (**2a**):  $1.2 \times 10^{-3}$  M in **Acetone/MeCN**. PhPCy<sub>2</sub> (**P**):  $1.5 \times 10^{-3}$  M in **Acetone/MeCN**. These results indicated that an EDA complex is not formed.

## 9. References

1. Guo, H.-M., He, B.-Q. & Wu, X, *Org. Lett.* **2022**, 24, 3199–3204.
2. Cai, Z., Gu, R., Si, W., Xiang, Y., Sun, J., Jiao, Y., Zhang, X., *Green Chem.* **2022**, 24, 6830–6835.
3. Chen, F., Xu, X., He, Y., Huang, G. & Zhu, S., *Angew. Chem. Int. Ed.* **2020**, 59, 5398–5402.
4. Schäfer, M.; Stünkel, T.; Daniliuc, C. G.; Gilmour, R., *Angew. Chem. Int. Ed.* **2022**, 61, e202205508.
5. Xia, P.-J.; Song, D.; Ye, Z.-P.; Hu, Y.-Z.; Xiao, J.-A.; Xiang, H.-Y.; Chen, X.-Q.; Yang, H., *Angew. Chem. Int. Ed.* **2020**, 59, 6706-6710.
6. Qiu, J.; Wang, C.; Zhou, L.; Lou, Y.; Yang, K.; Song, Q., *Org. Lett.* **2022**, 24, 2446-2451.
7. Zhu, C., Zhang, Y.-F., Liu, Z.-Y., Zhou, L., Liu, H., Feng, C. *Chem. Sci.* **2019**, 10, 6721–6726.
8. Supranovich, V. I., Levin, V. V., Kokorekin, V. A. & Dilman, A. D, *Adv. Synth. Catal.* **2021**, 363, 2888–2892.
9. Lu, X., Wang, X.-X., Gong, T.-J., Pi, J.-J., He, S.-J., Fu, Y., *Chem. Sci.* **2019**, 10, 809–814.
10. Gladkov, A. A., Chernov, G. N., Levin, V. V., Kokorekin, V. A. & Dilman, A. D, *Org. Lett.* **2021**, 23, 9645–9648.

## 10. Copies of NMR Spectra

$^1\text{H}$  NMR (400 MHz, DMSO- $\text{D}_6$ )

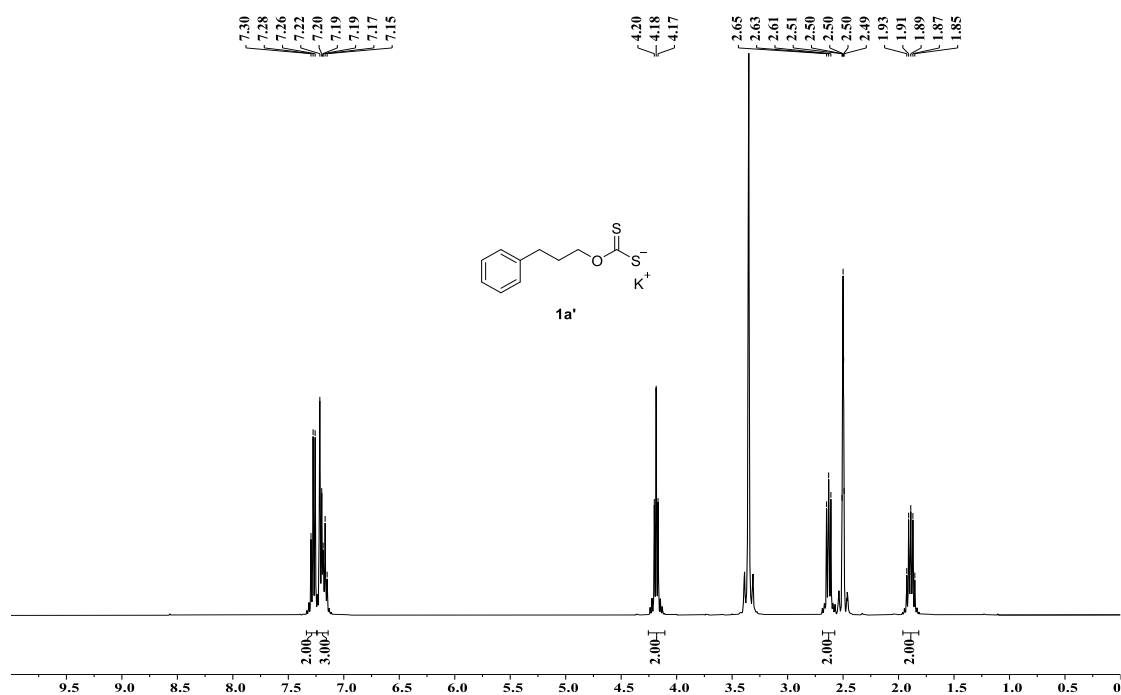

$^{13}\text{C}$  NMR (100 MHz, DMSO- $\text{D}_6$ )

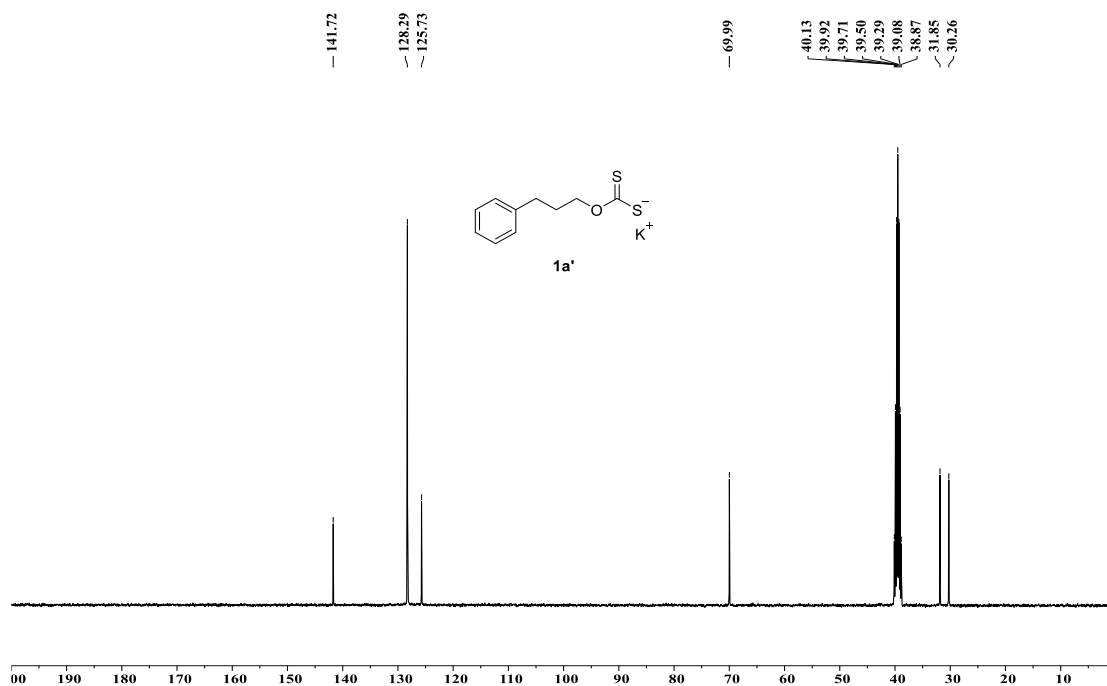

$^1\text{H}$  NMR (400 MHz,  $\text{CDCl}_3$ )

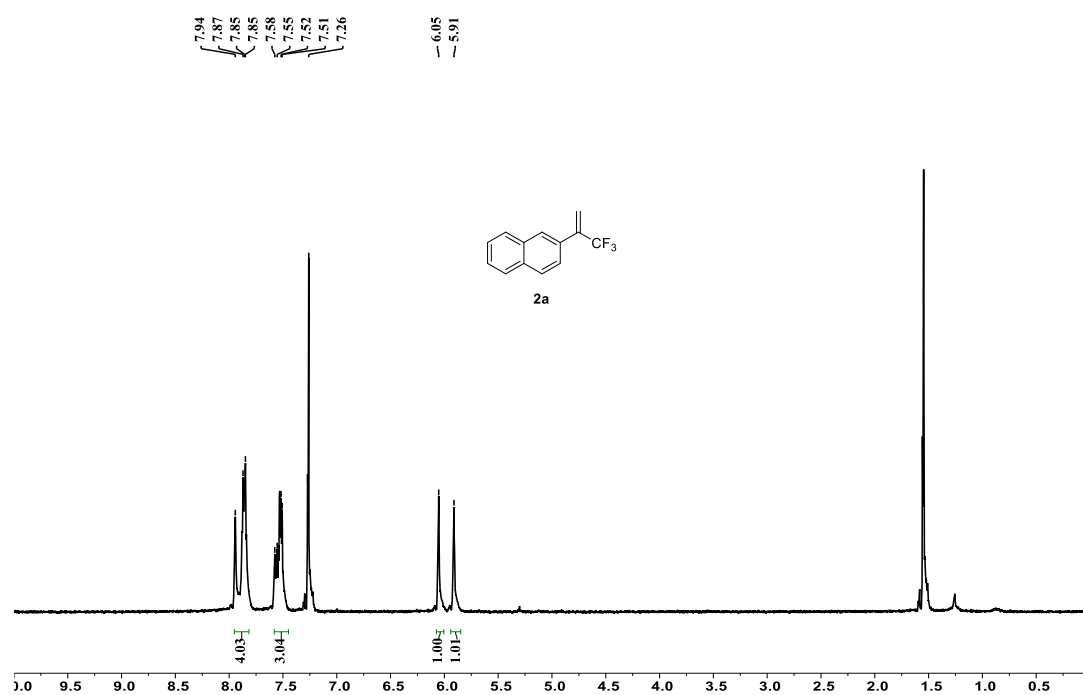

$^1\text{H}$  NMR (400 MHz,  $\text{CDCl}_3$ )

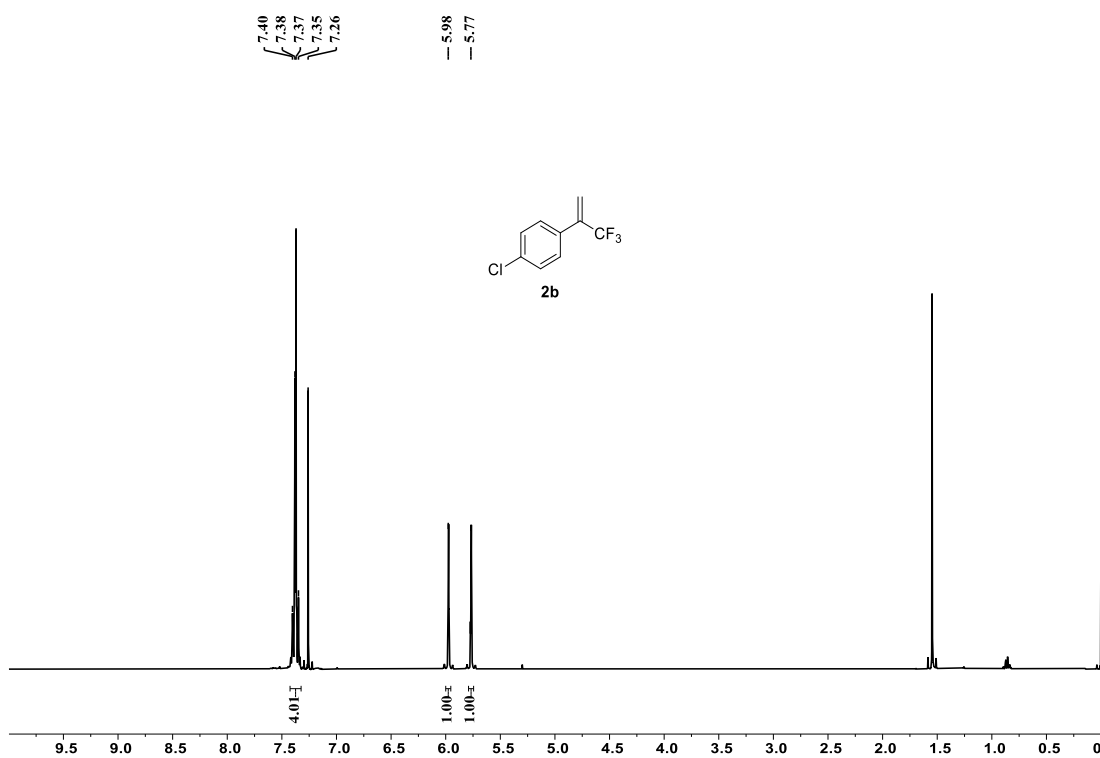

$^1\text{H}$  NMR (400 MHz,  $\text{CDCl}_3$ )

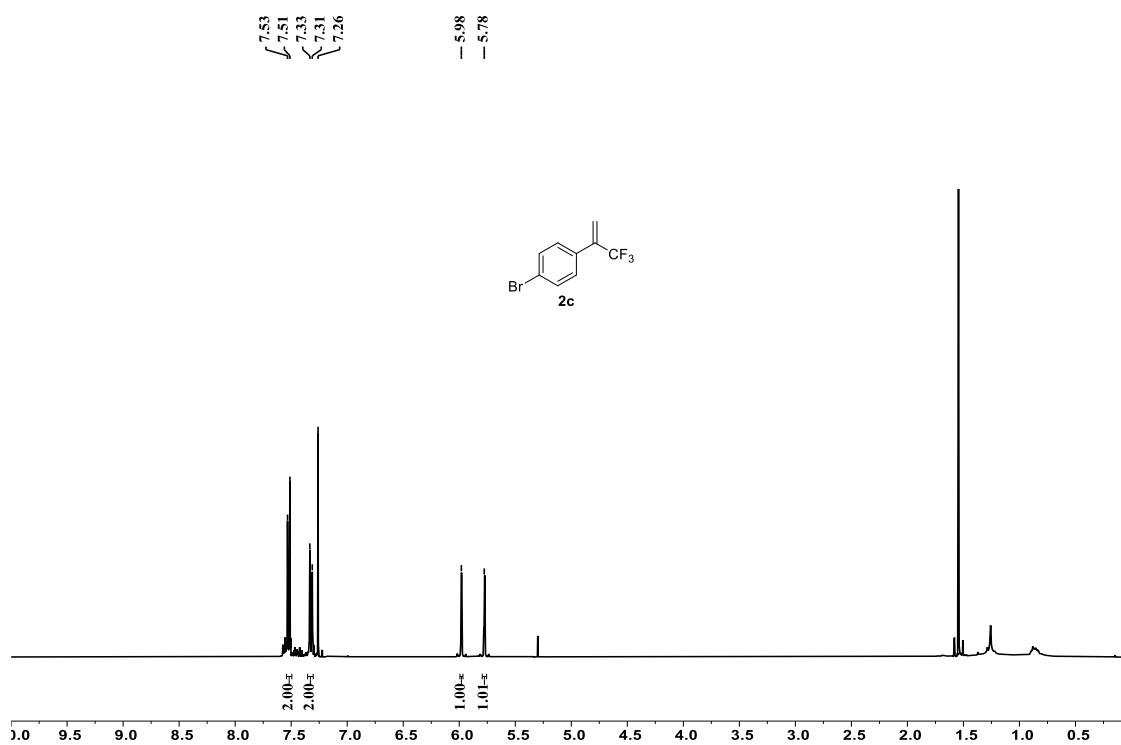

$^1\text{H}$  NMR (400 MHz,  $\text{CDCl}_3$ )

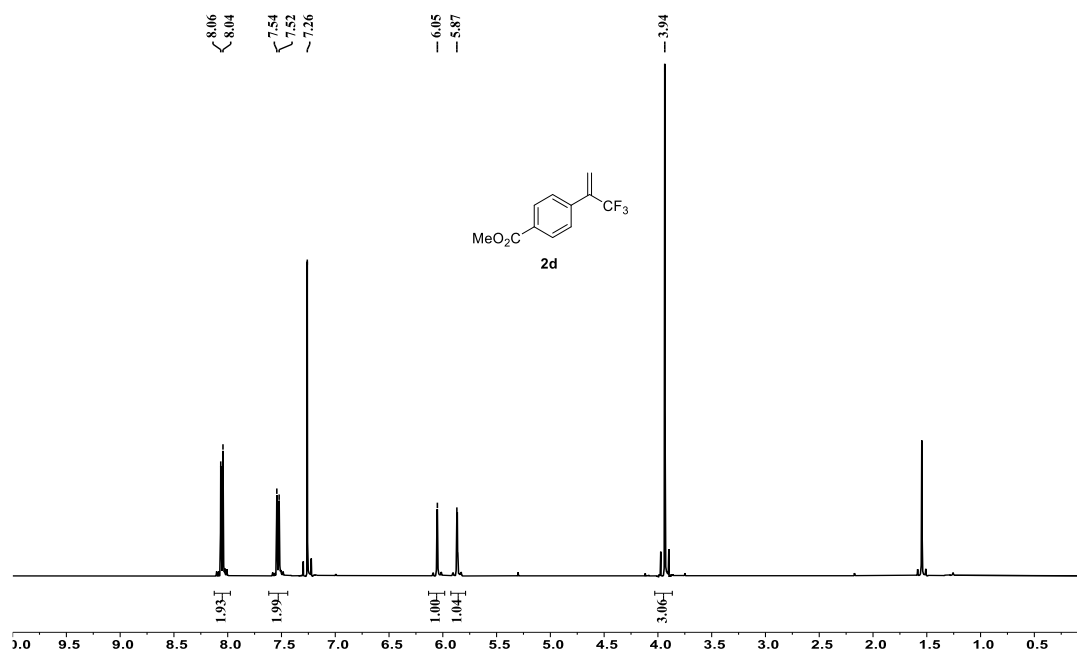

$^1\text{H NMR}$  (400 MHz,  $\text{CDCl}_3$ )

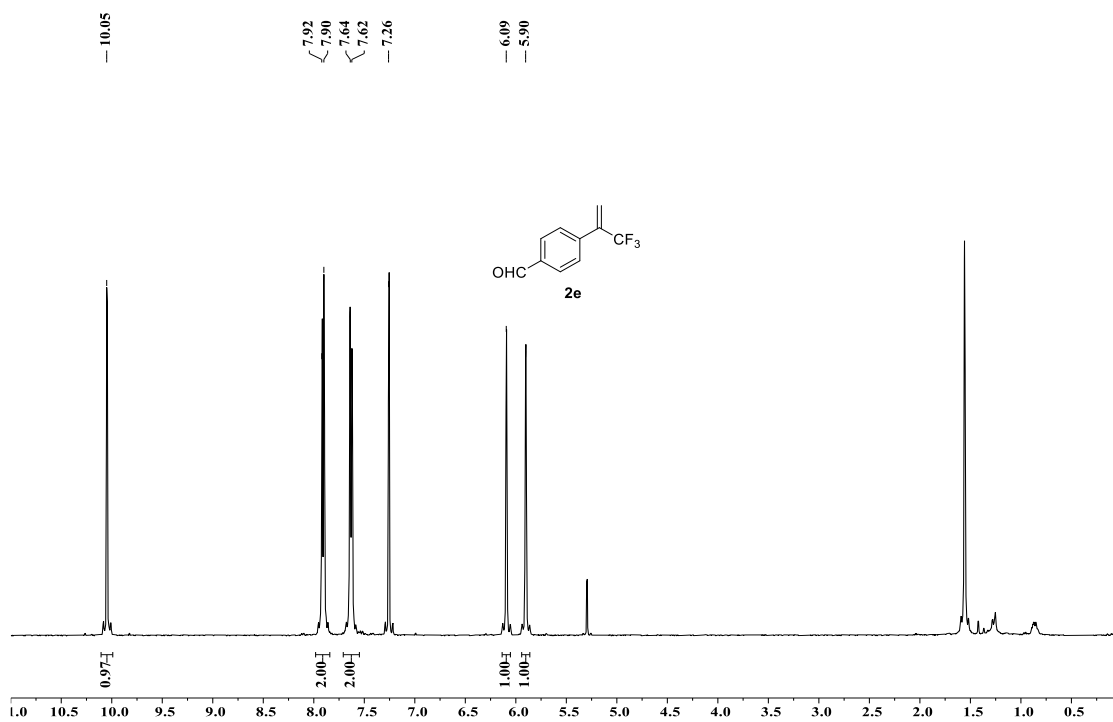

$^1\text{H NMR}$  (400 MHz,  $\text{CDCl}_3$ )

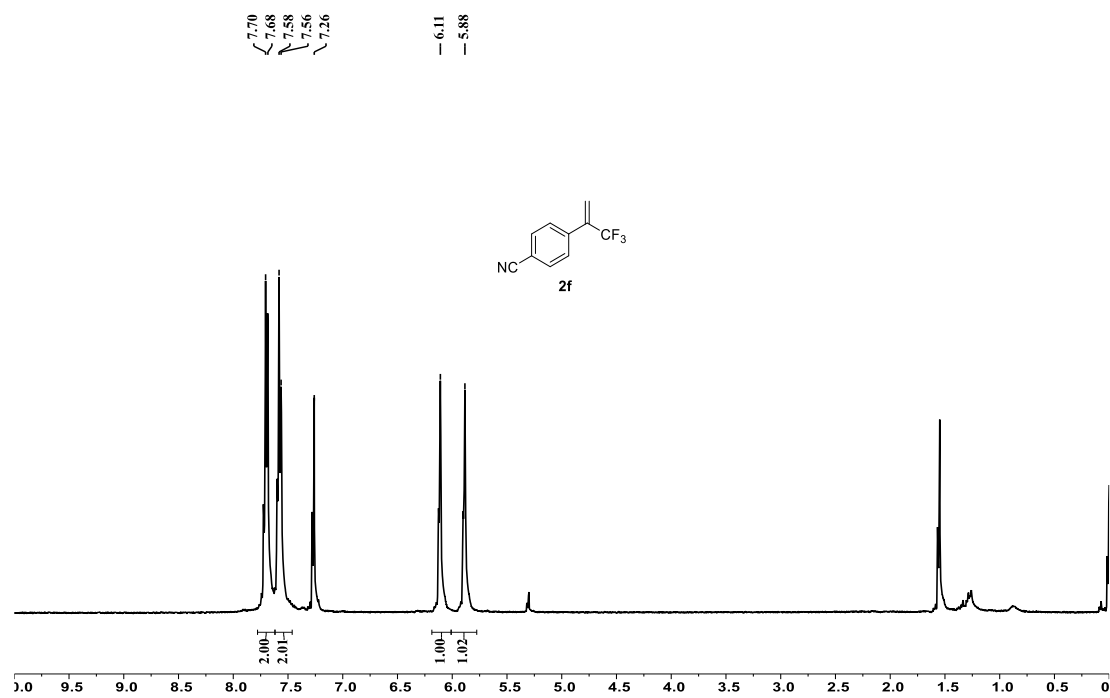



$^1\text{H}$  NMR (400 MHz,  $\text{CDCl}_3$ )

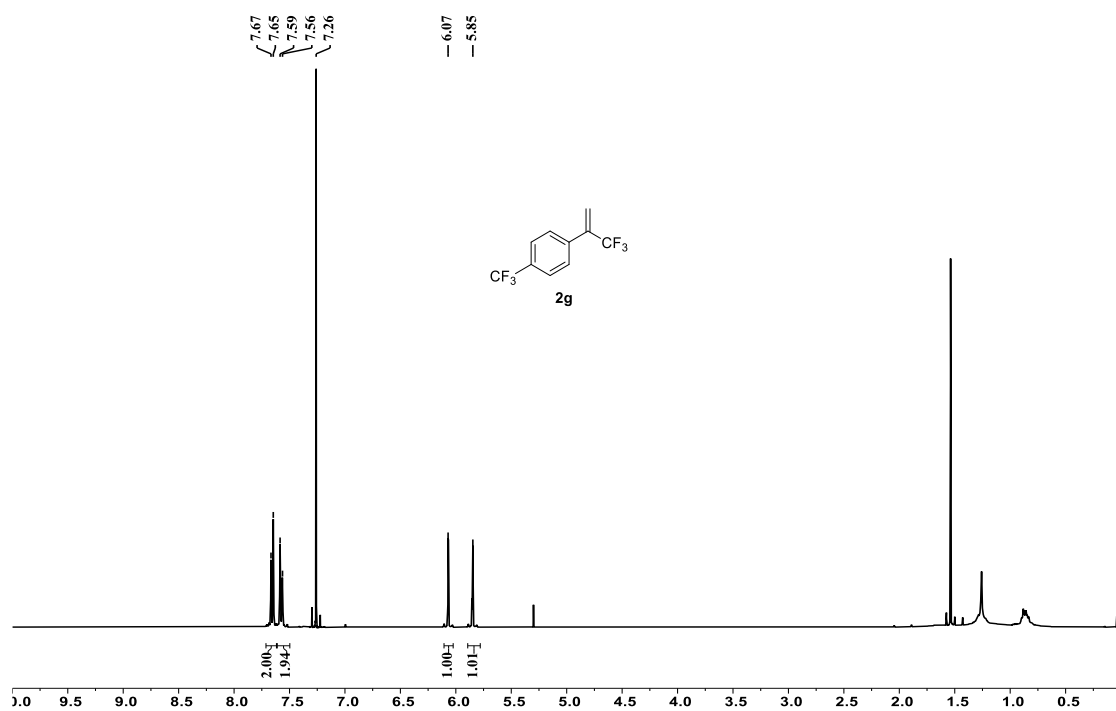

$^1\text{H}$  NMR (400 MHz,  $\text{CDCl}_3$ )

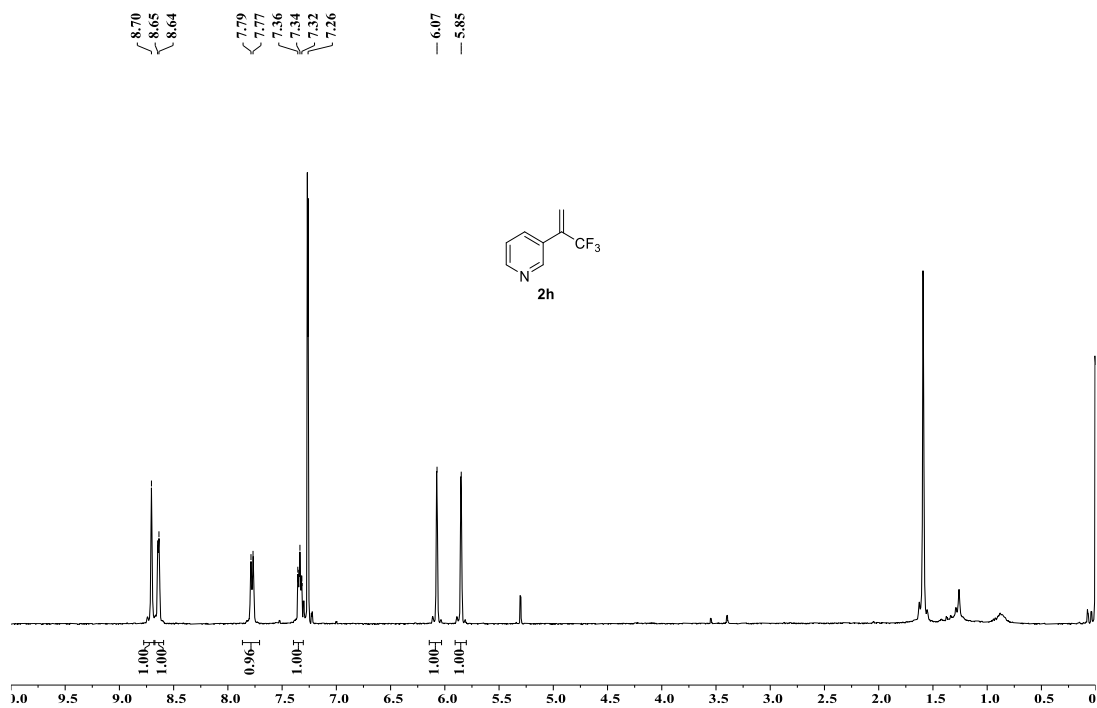

$^1\text{H}$  NMR (400 MHz,  $\text{CDCl}_3$ )

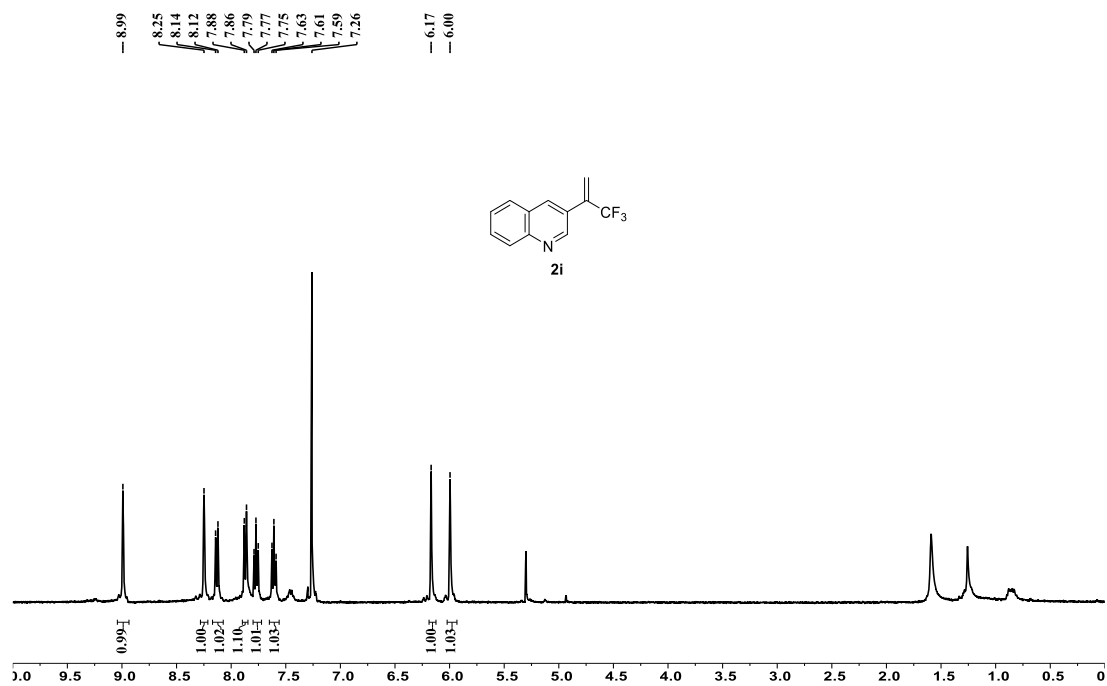

$^1\text{H}$  NMR (400 MHz,  $\text{CDCl}_3$ )

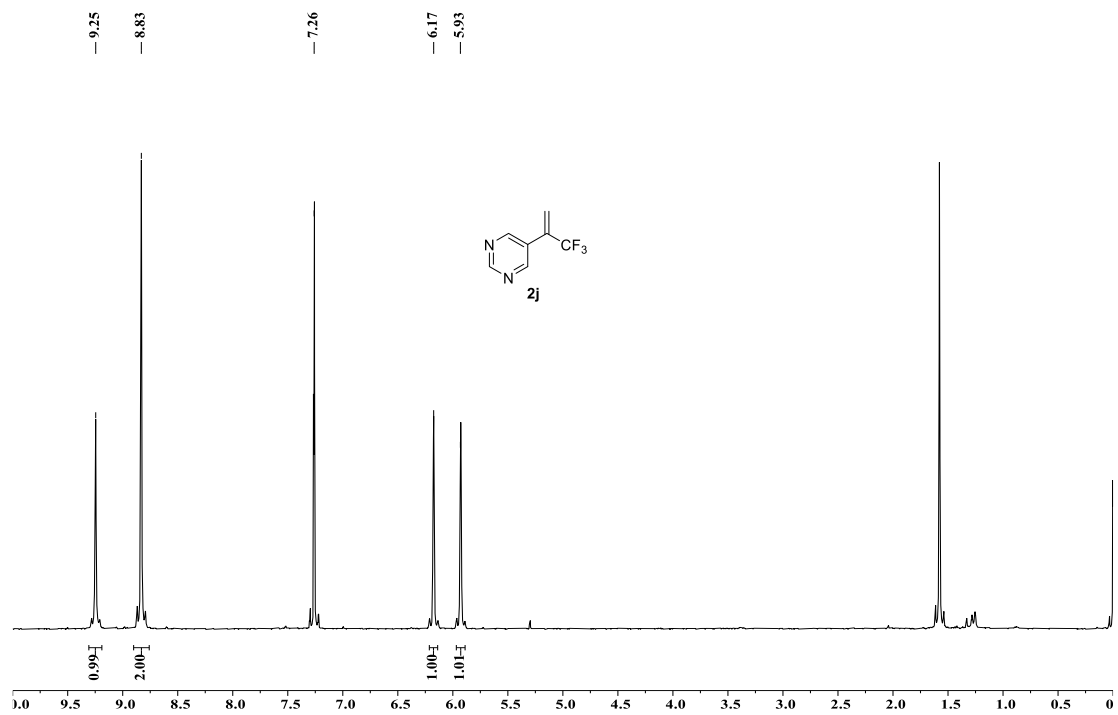

$^1\text{H}$  NMR (400 MHz,  $\text{CDCl}_3$ )

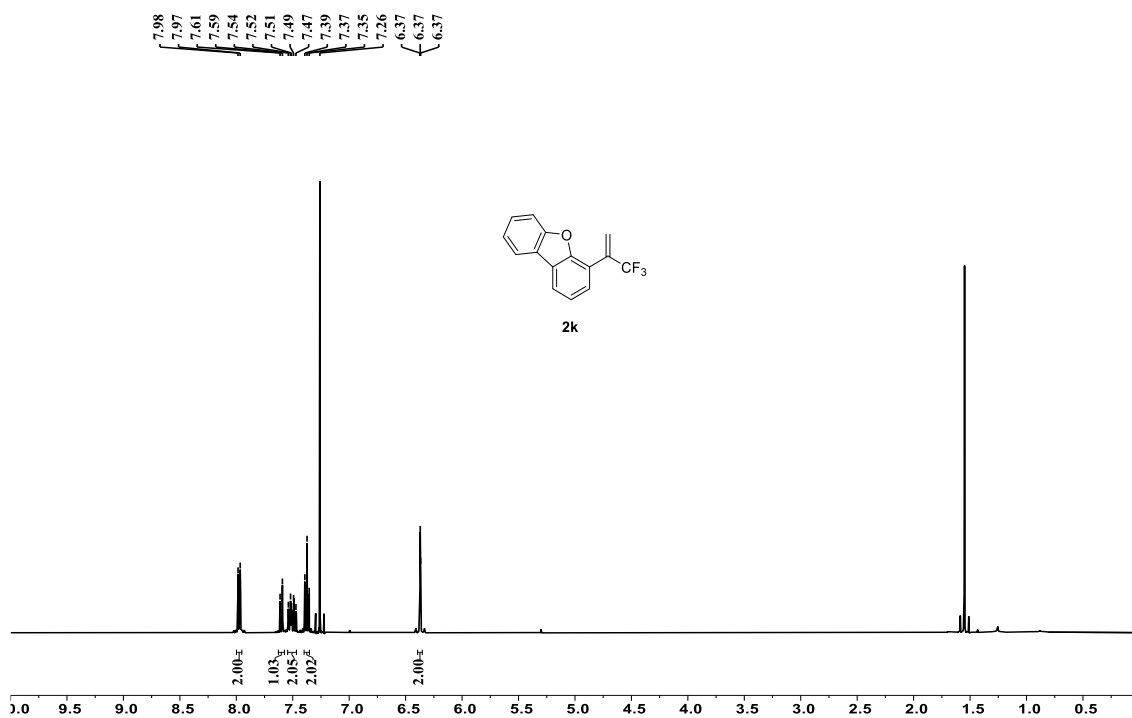

$^1\text{H}$  NMR (400 MHz,  $\text{CDCl}_3$ )

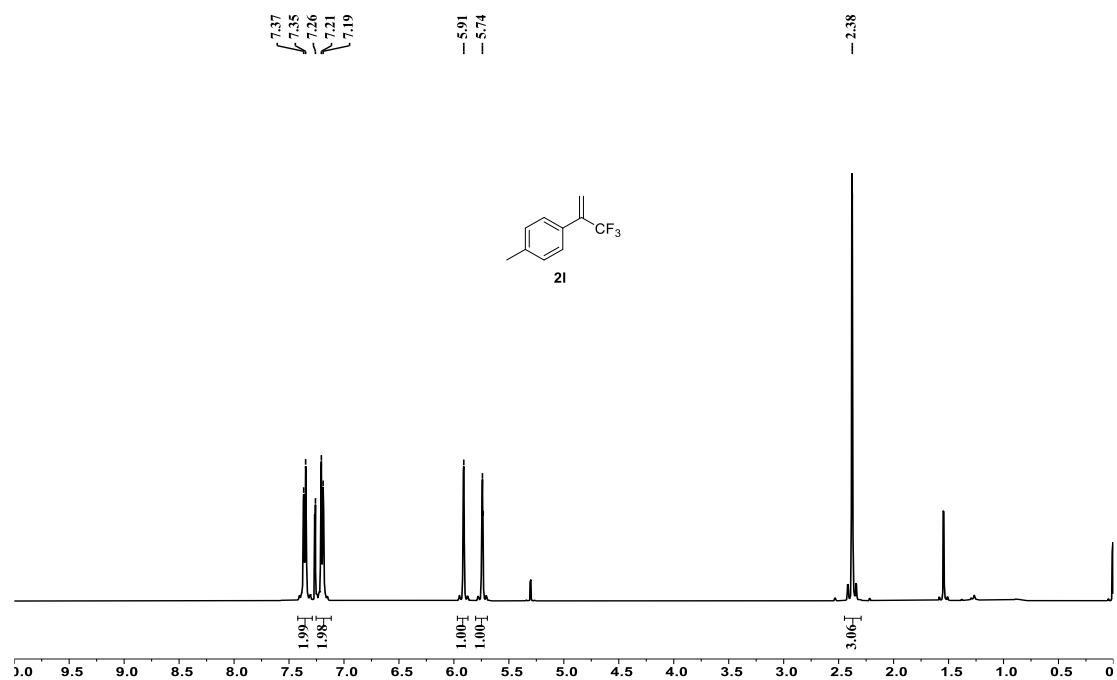

$^1\text{H}$  NMR (400 MHz,  $\text{CDCl}_3$ )

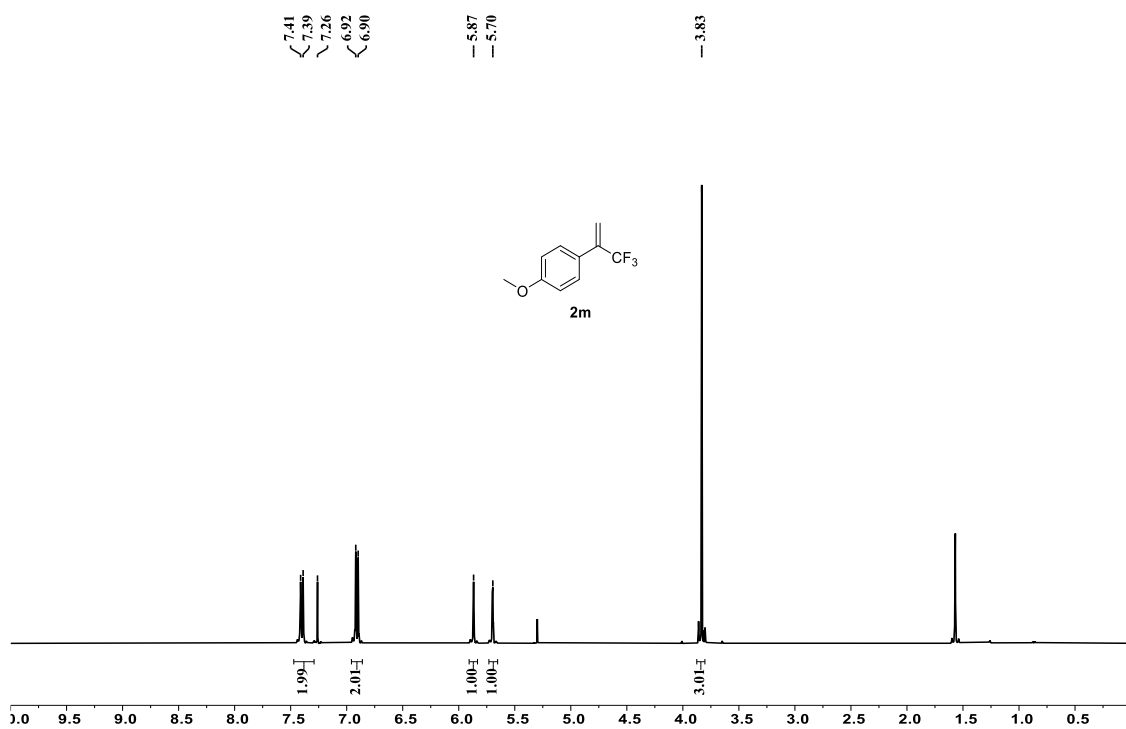

$^1\text{H}$  NMR (400 MHz,  $\text{CDCl}_3$ )

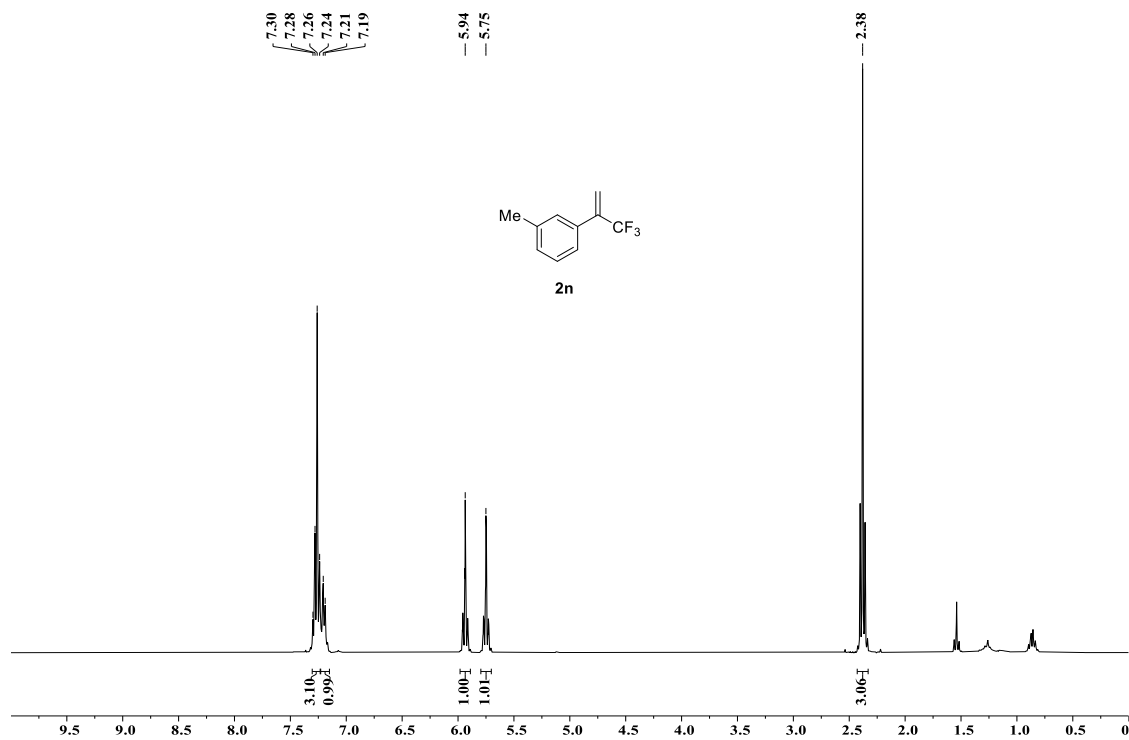

$^1\text{H}$  NMR (400 MHz,  $\text{CDCl}_3$ )

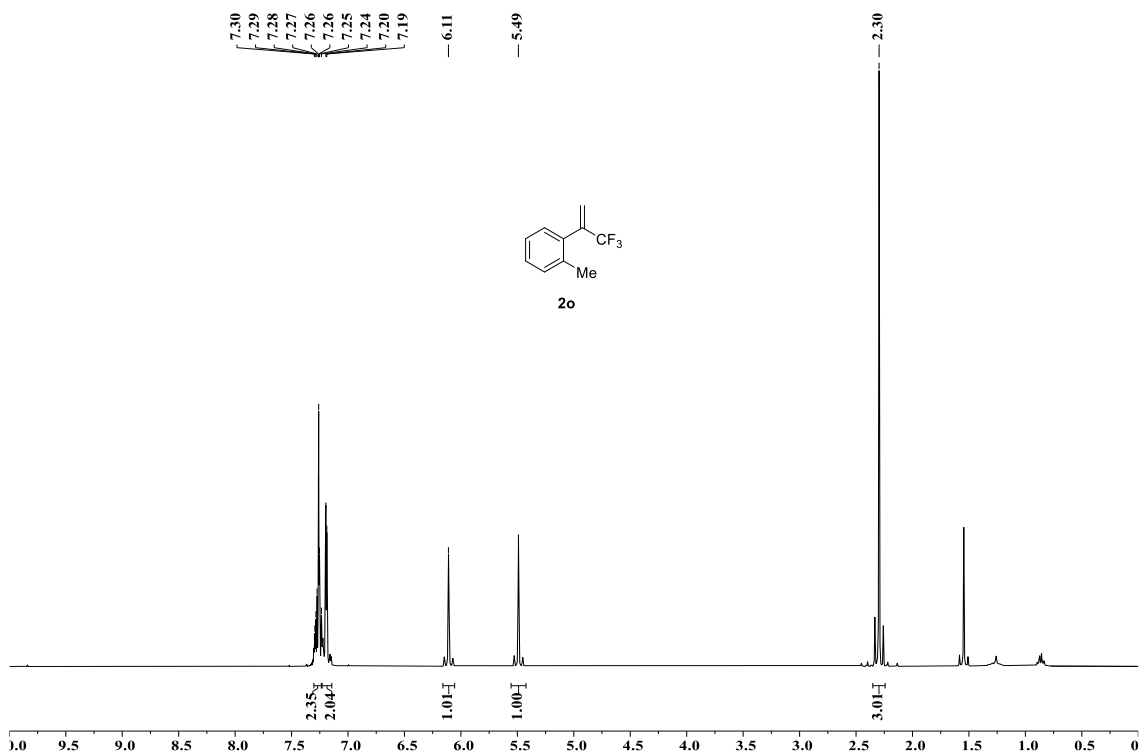

$^1\text{H}$  NMR (400 MHz,  $\text{CDCl}_3$ )

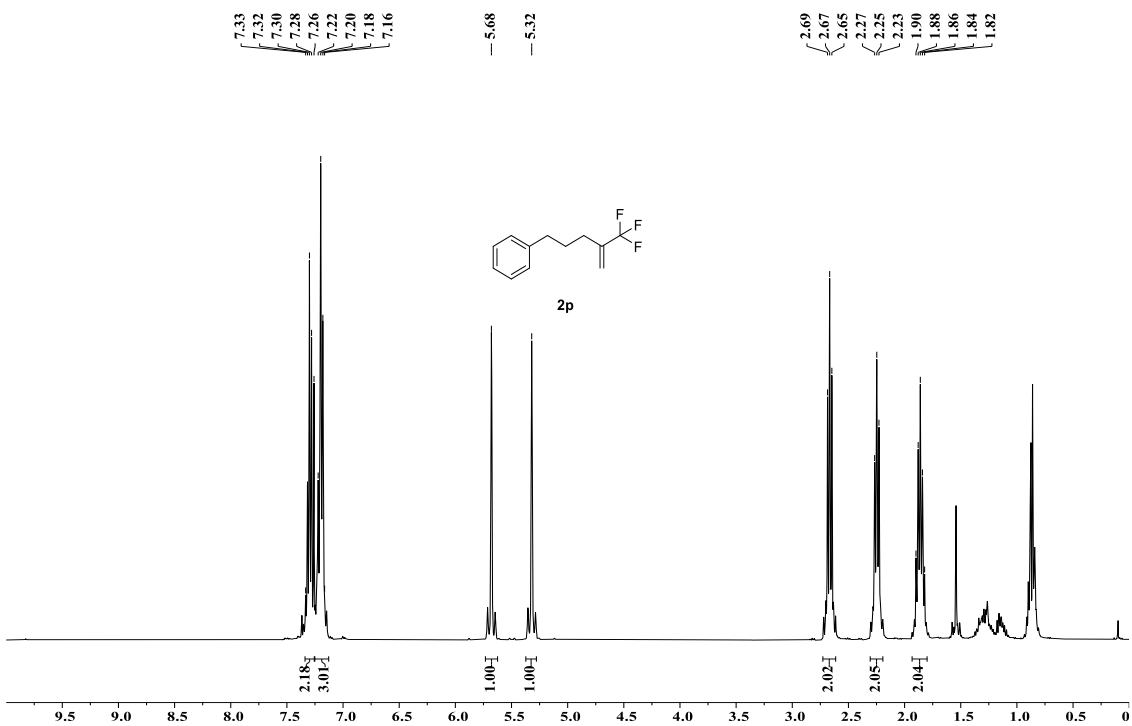

$^1\text{H}$  NMR (400 MHz,  $\text{CDCl}_3$ )

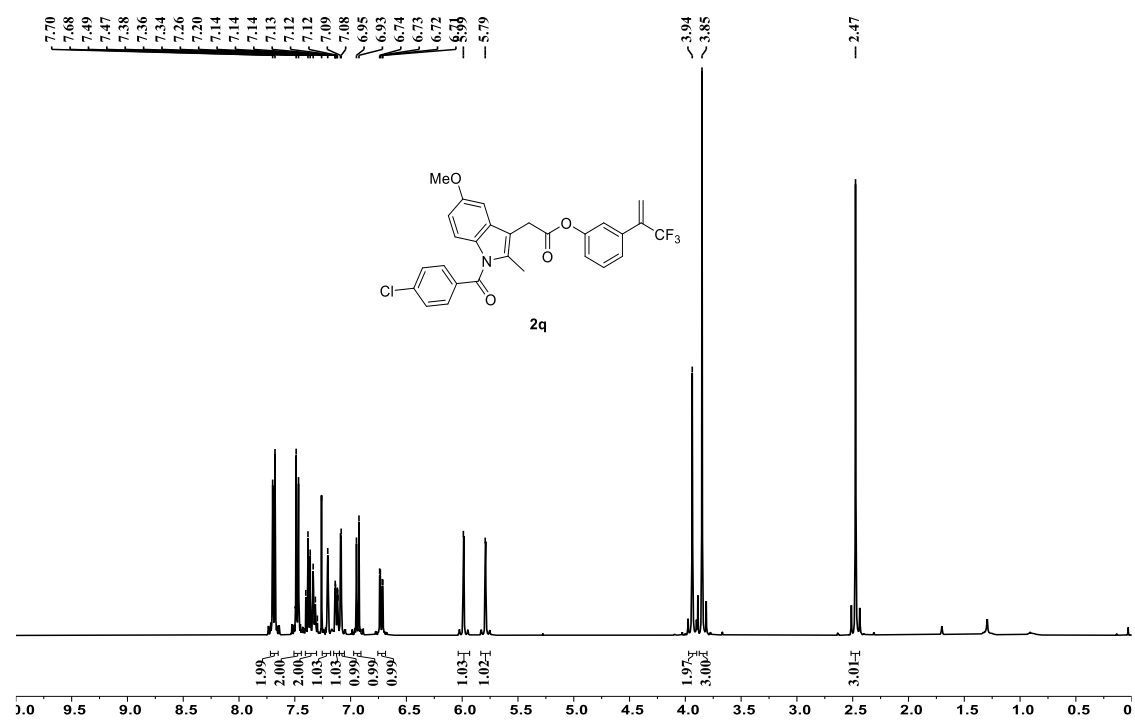

$^1\text{H}$  NMR (400 MHz,  $\text{CDCl}_3$ )

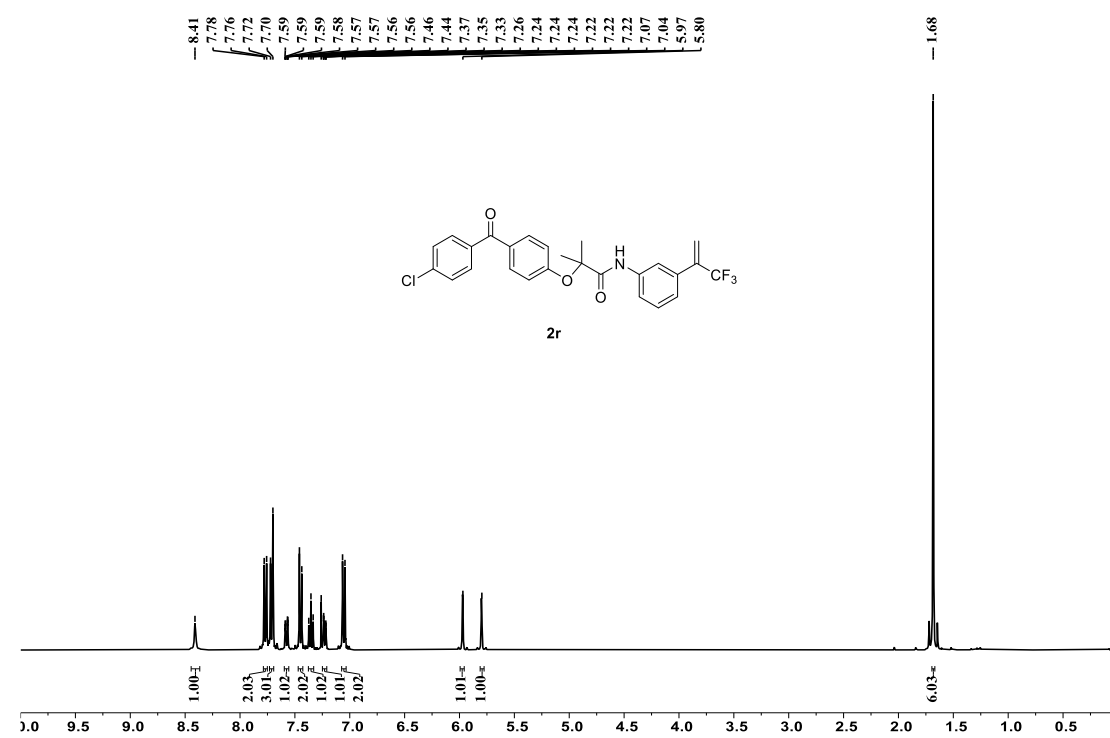

$^1\text{H}$  NMR (400 MHz,  $\text{CDCl}_3$ )

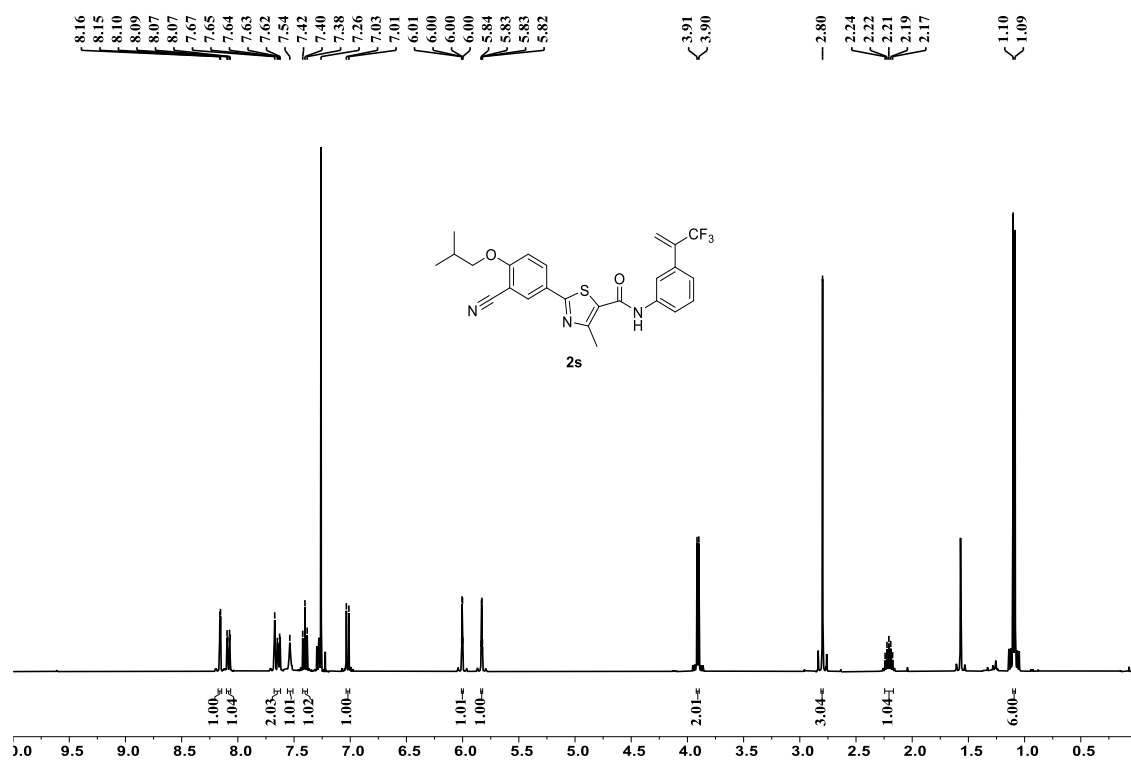

$^1\text{H}$  NMR (400 MHz,  $\text{CDCl}_3$ )

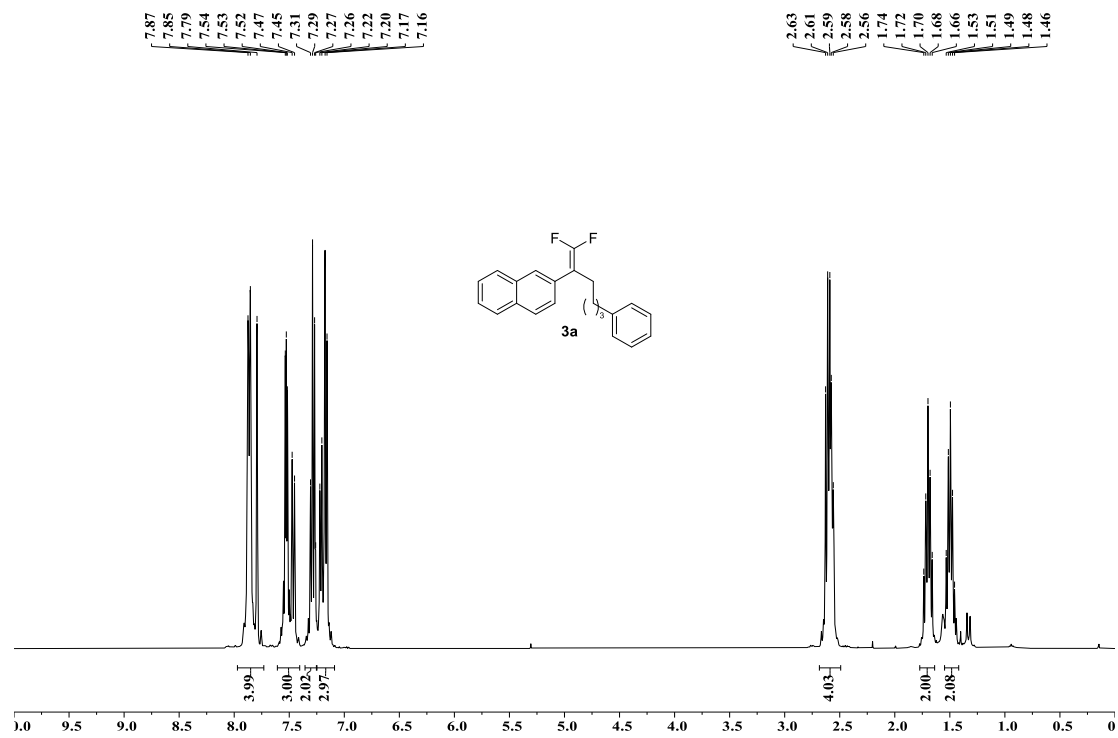

$^{13}\text{C}$  NMR (100 MHz,  $\text{CDCl}_3$ )

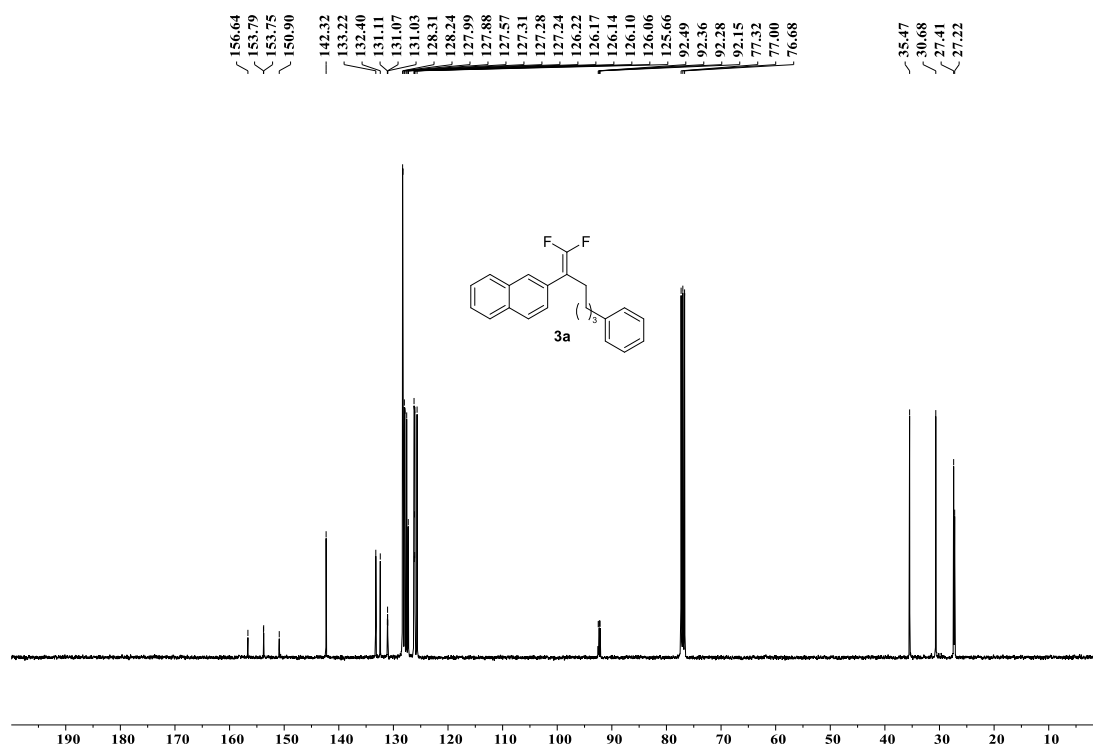

$^{19}\text{F}$  NMR (376 MHz,  $\text{CDCl}_3$ )

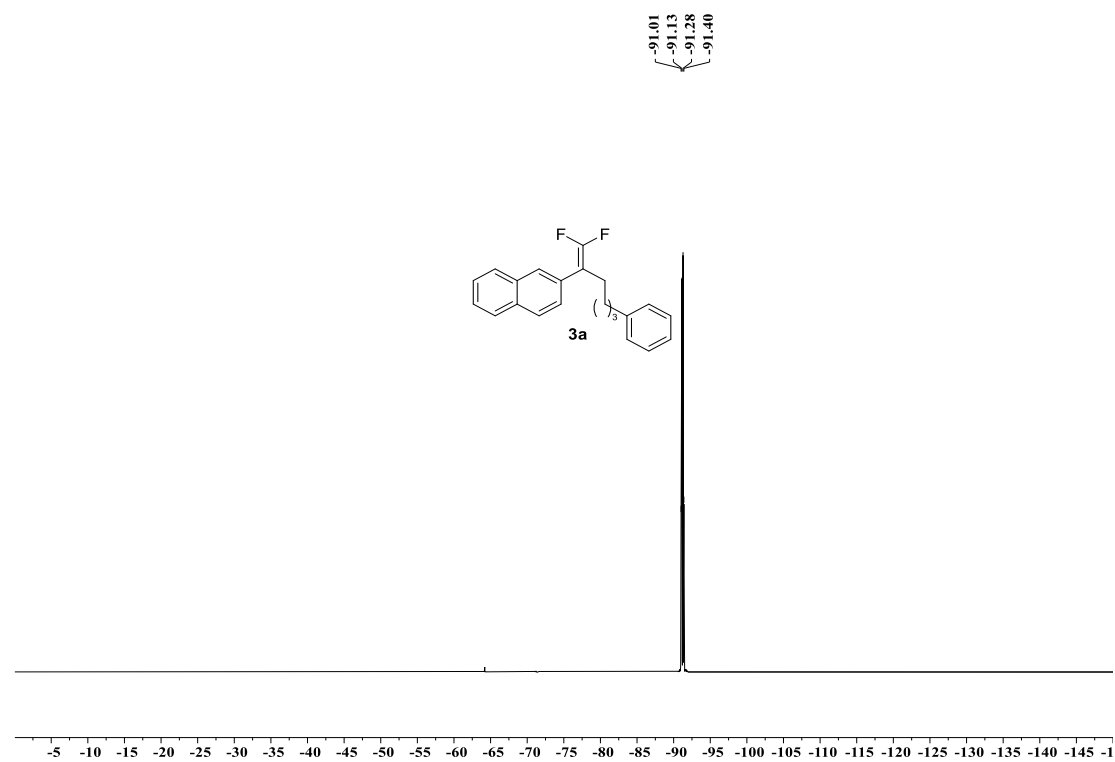



$^1\text{H}$  NMR (400 MHz,  $\text{CDCl}_3$ )

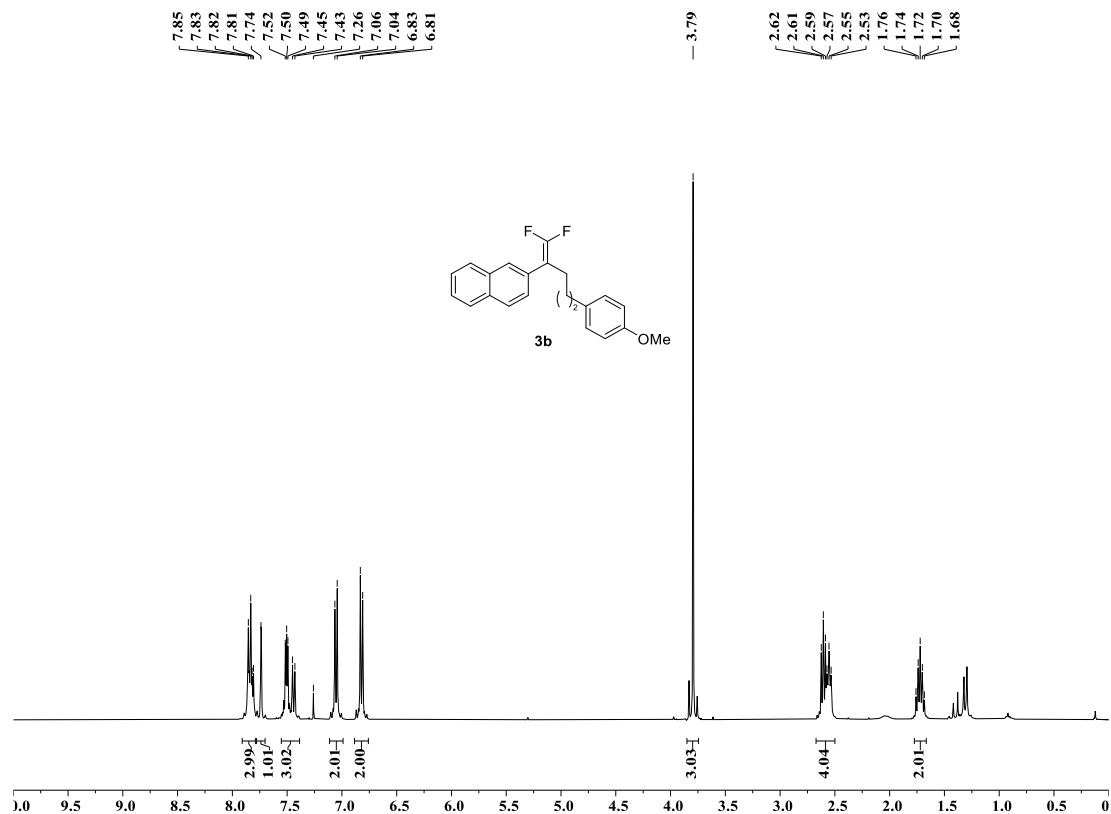

$^{13}\text{C}$  NMR (100 MHz,  $\text{CDCl}_3$ )

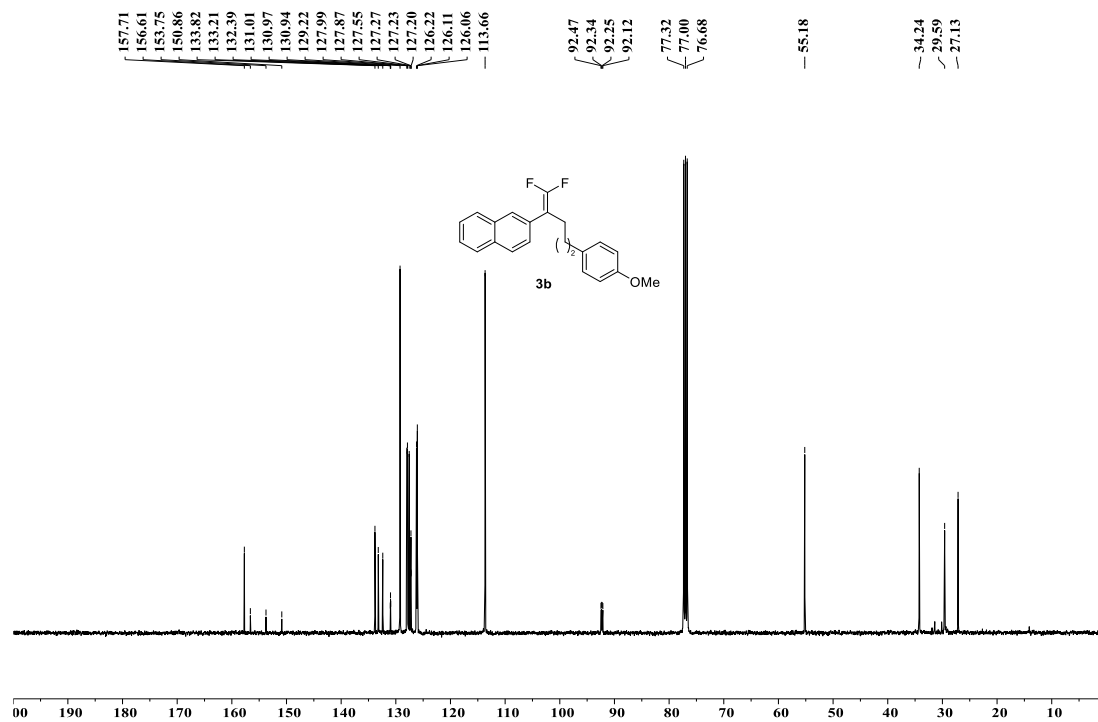

$^{19}\text{F}$  NMR (376 MHz,  $\text{CDCl}_3$ )

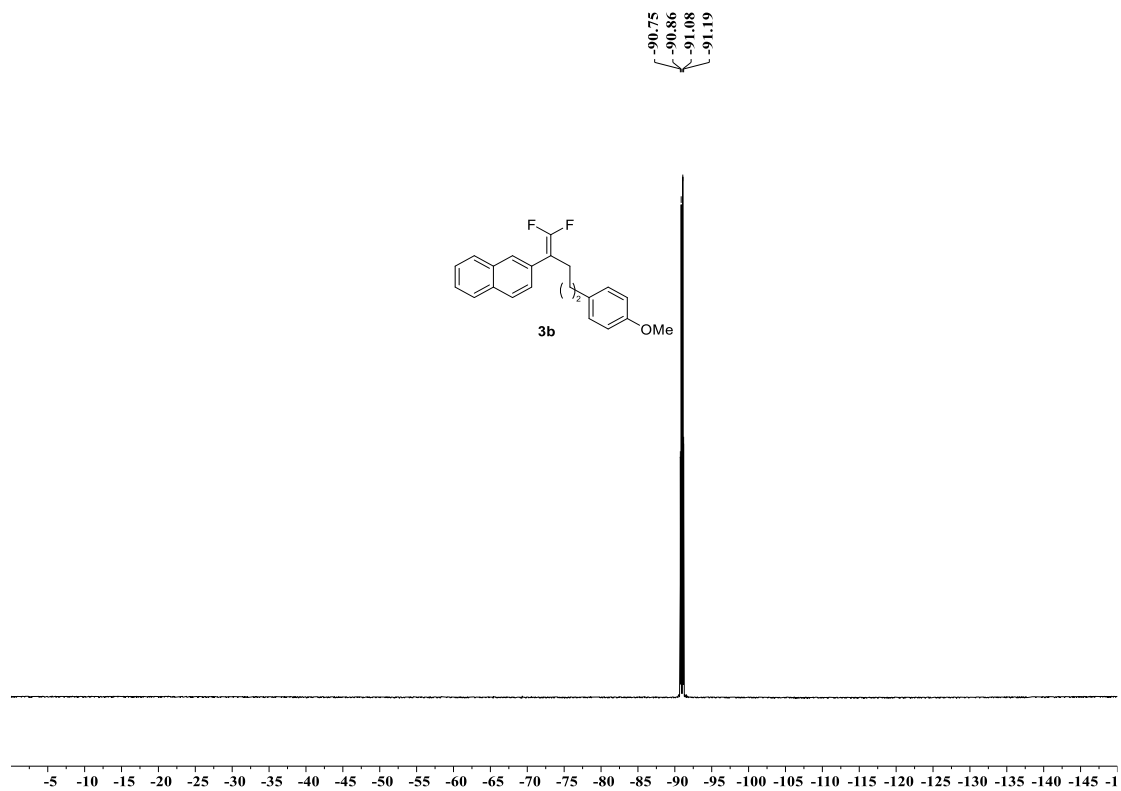

$^1\text{H}$  NMR (400 MHz,  $\text{CDCl}_3$ )

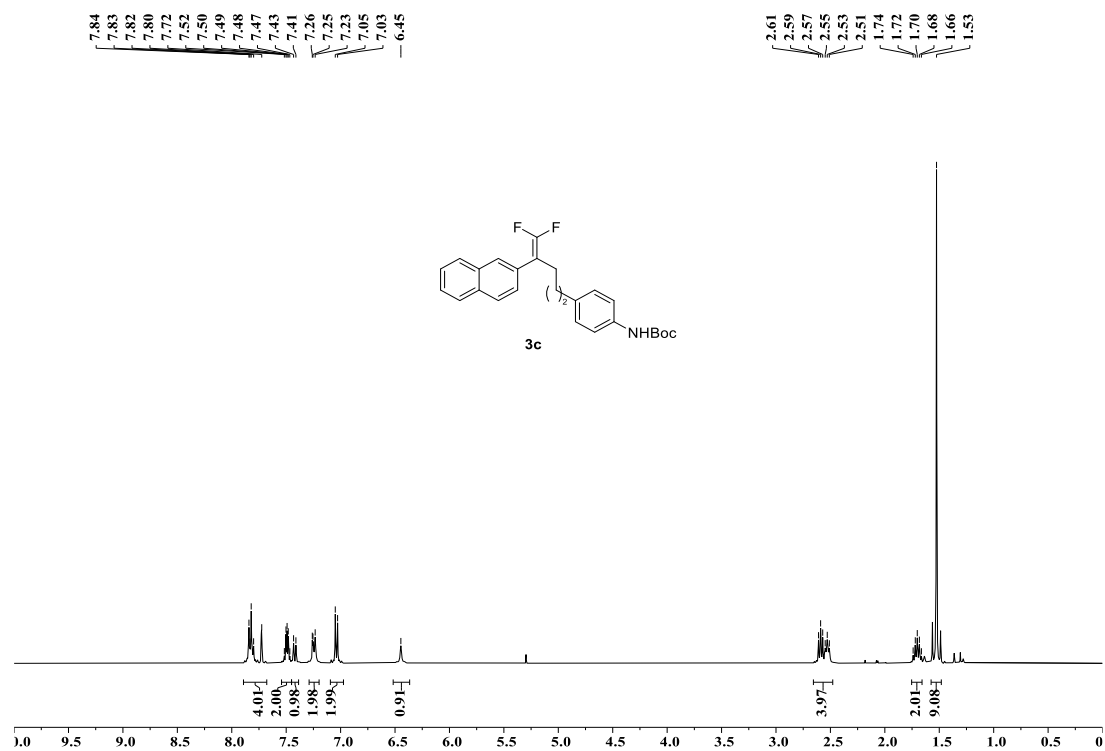

$^{13}\text{C}$  NMR (100 MHz,  $\text{CDCl}_3$ )

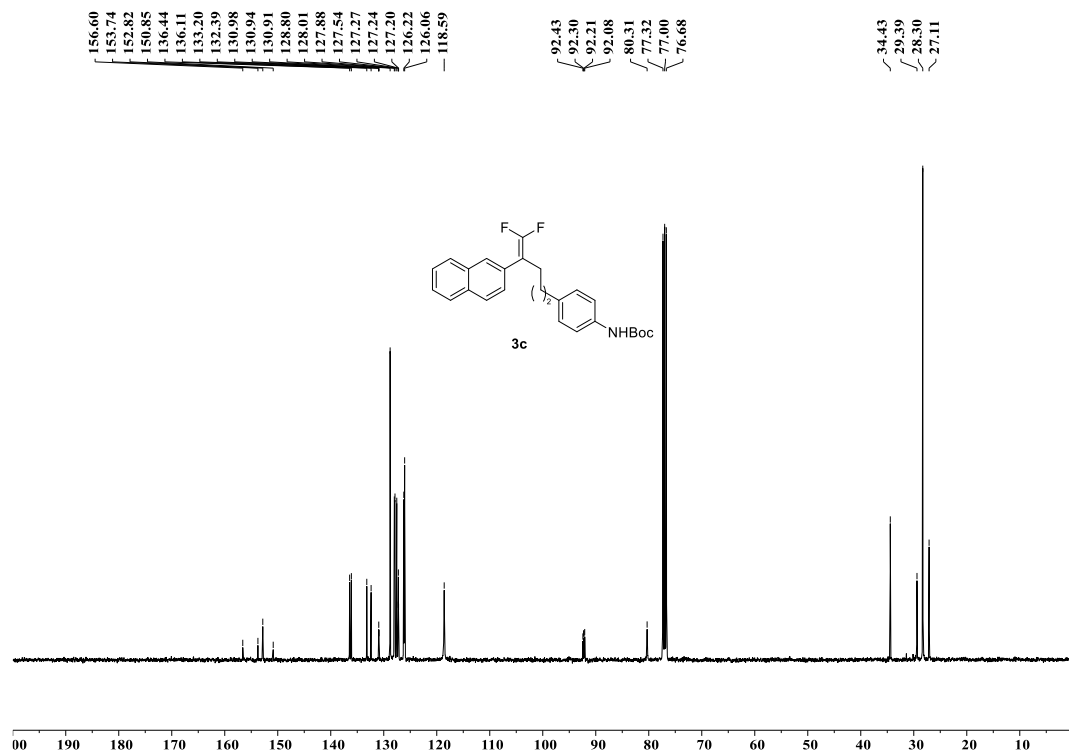

$^{19}\text{F}$  NMR (376 MHz,  $\text{CDCl}_3$ )

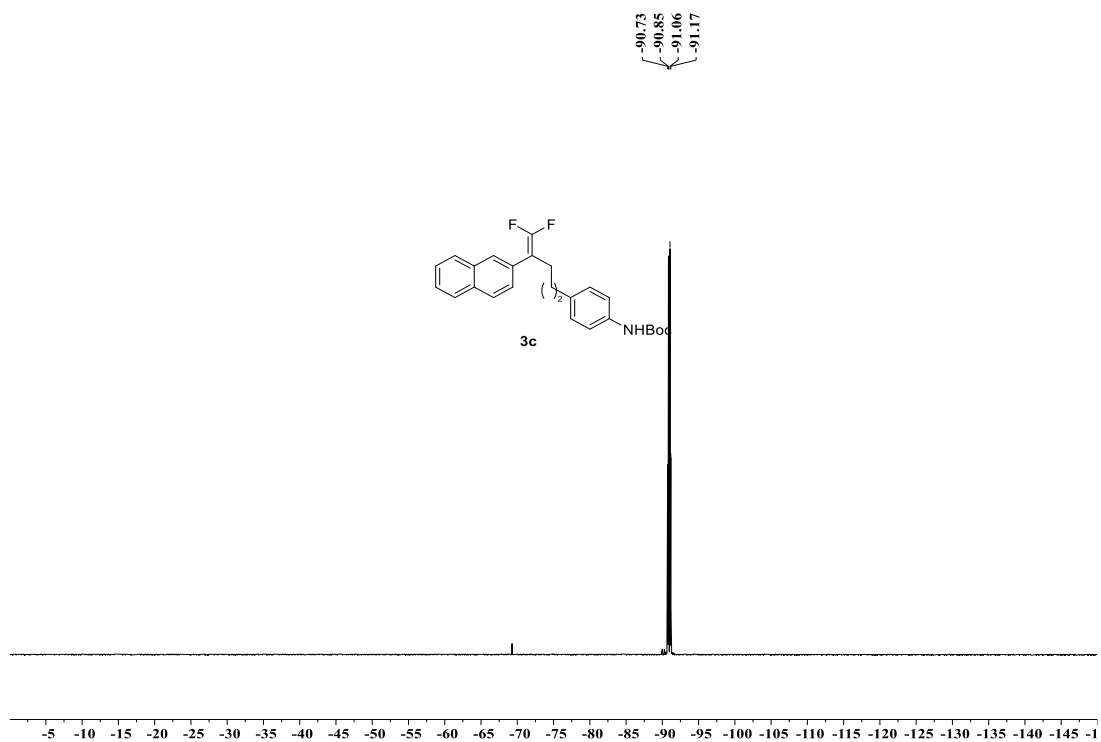

$^1\text{H}$  NMR (400 MHz,  $\text{CDCl}_3$ )

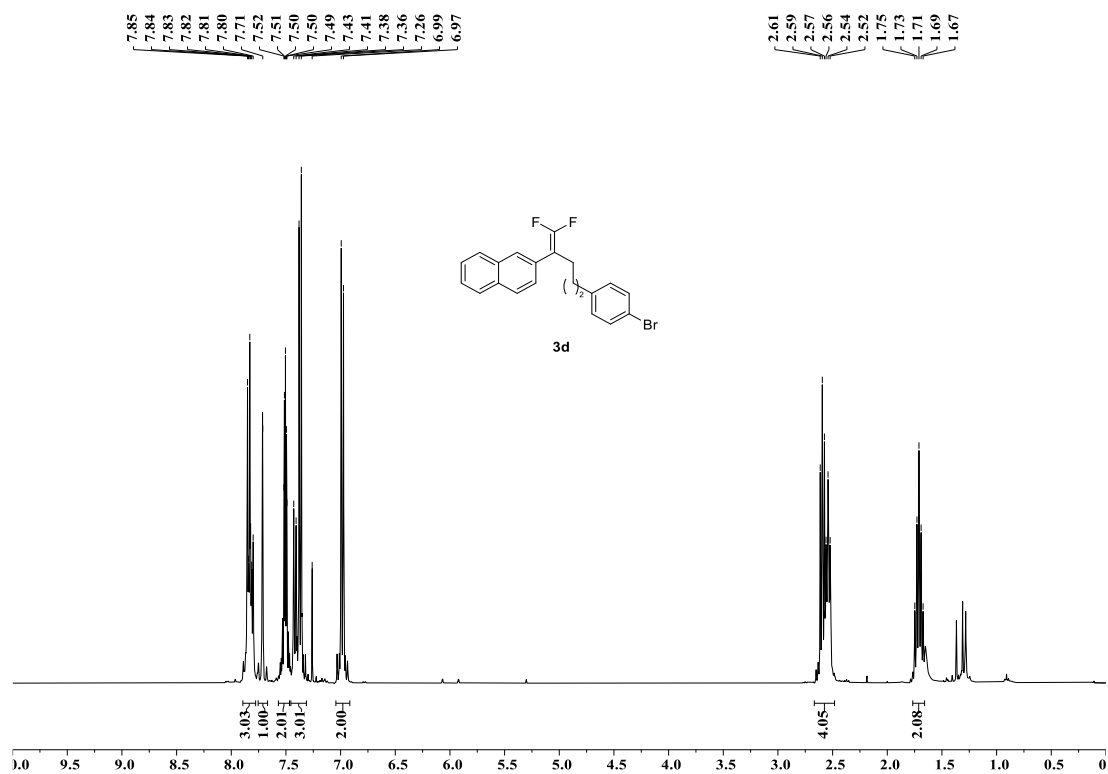

$^{13}\text{C}$  NMR (100 MHz,  $\text{CDCl}_3$ )

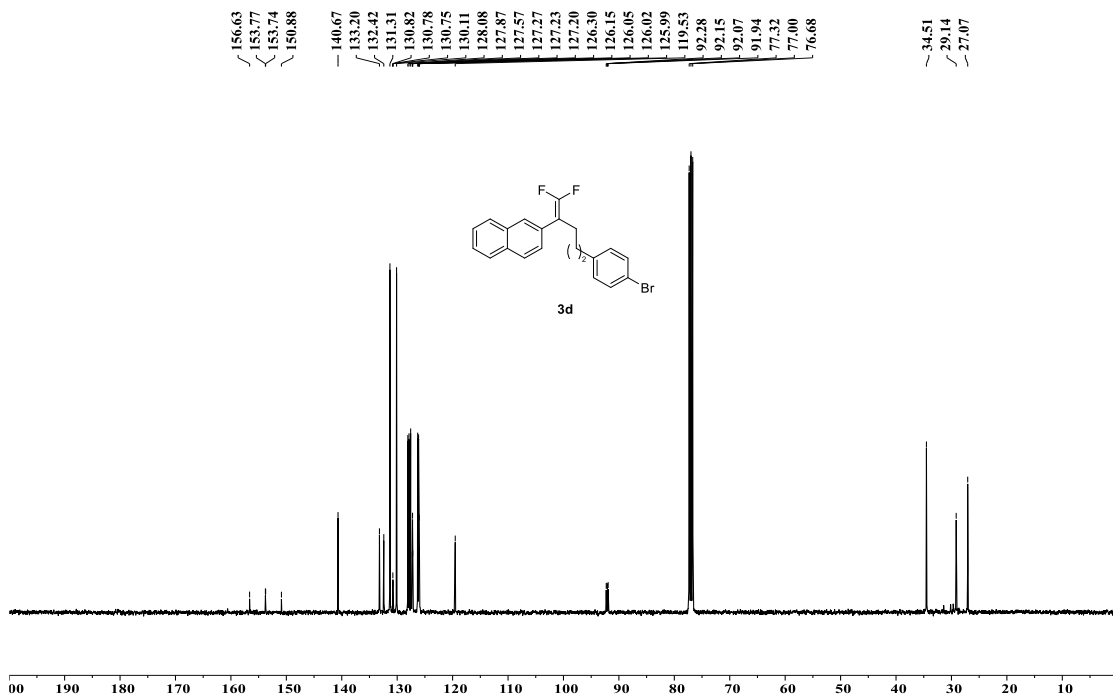

$^{19}\text{F}$  NMR (376 MHz,  $\text{CDCl}_3$ )

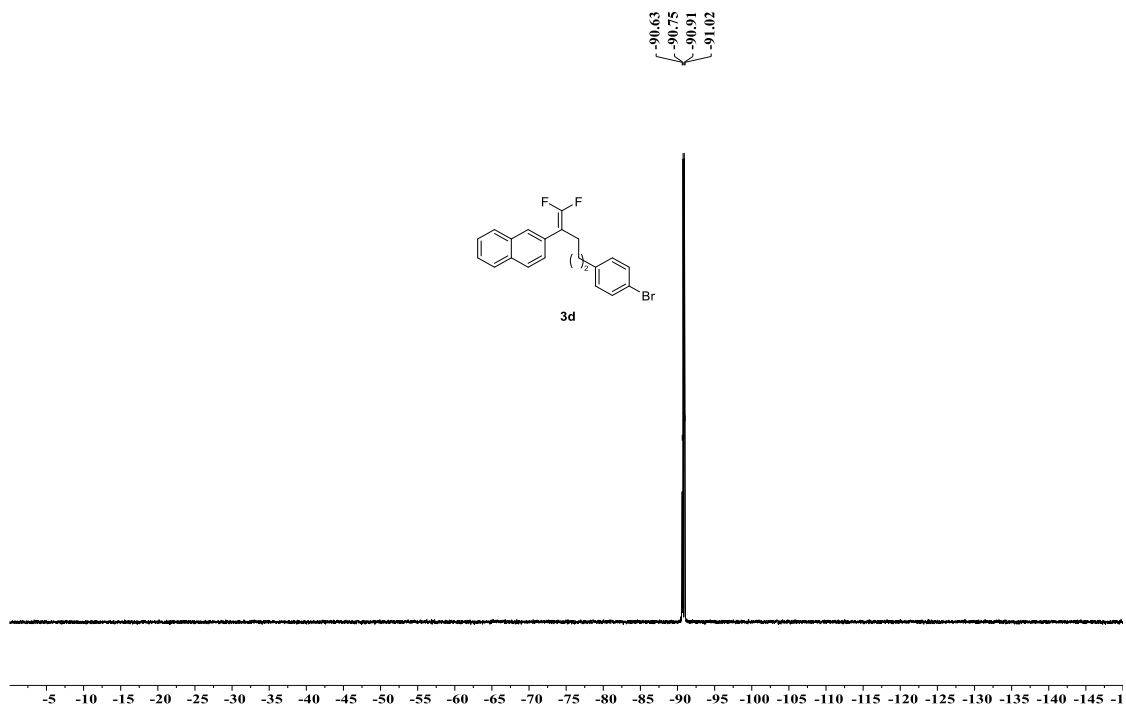

$^1\text{H}$  NMR (400 MHz,  $\text{CDCl}_3$ )

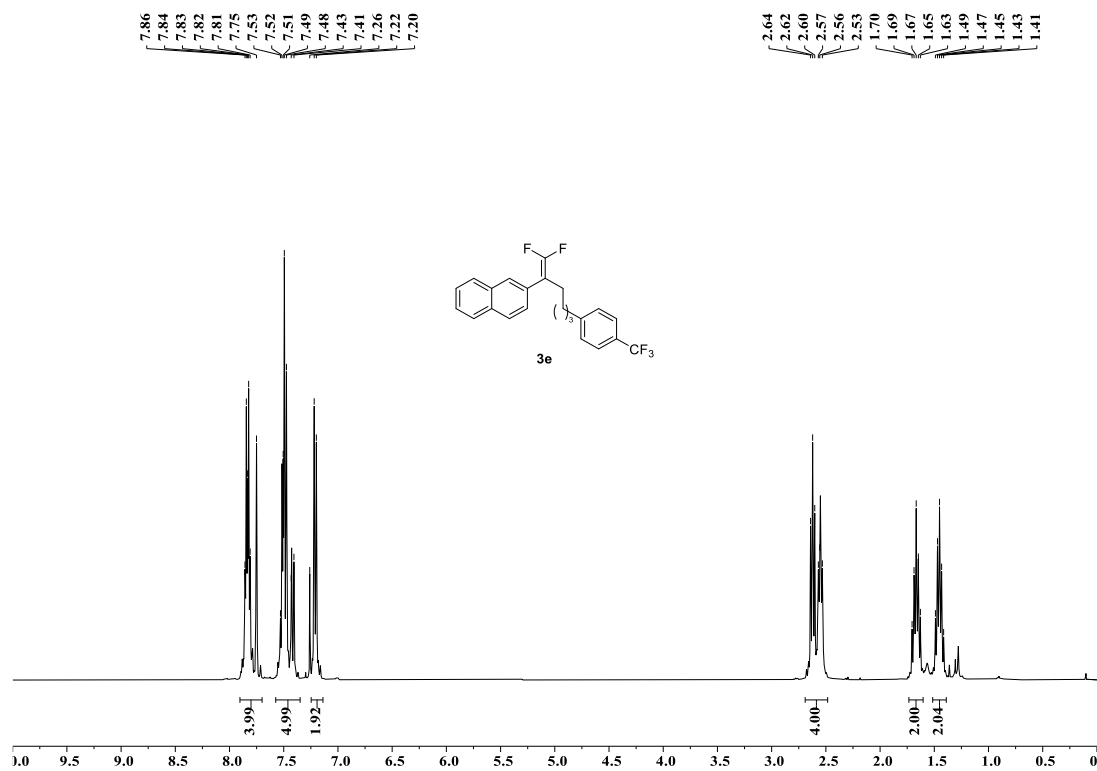

$^{13}\text{C}$  NMR (100 MHz,  $\text{CDCl}_3$ )

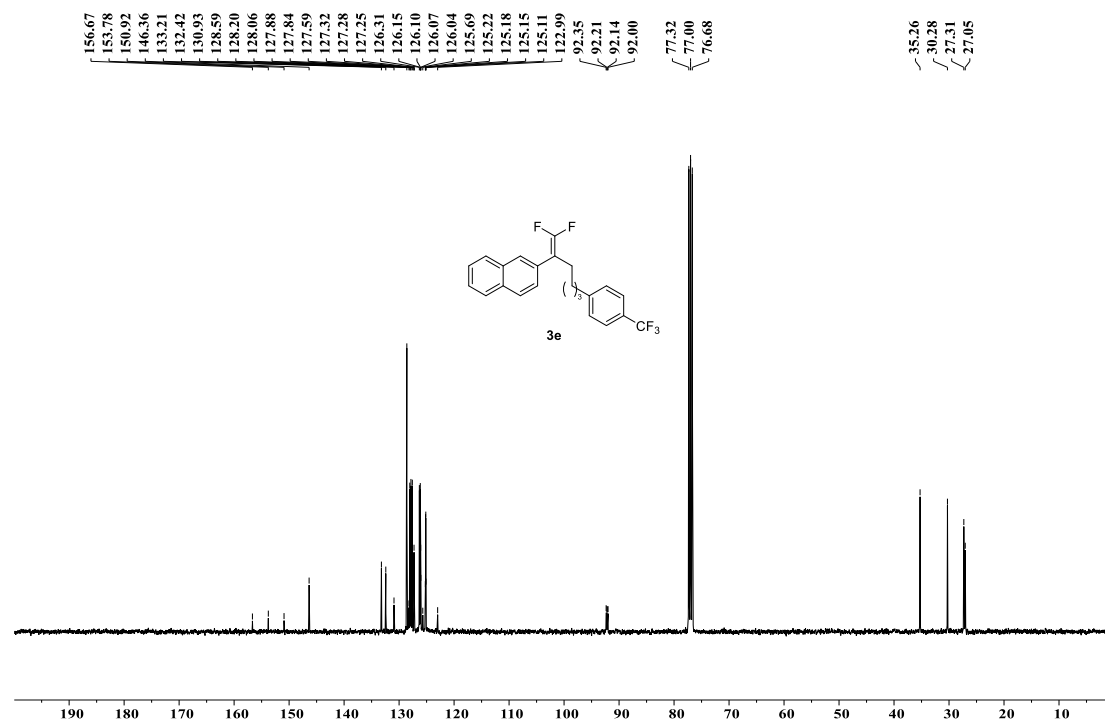

$^{19}\text{F}$  NMR (376 MHz,  $\text{CDCl}_3$ )

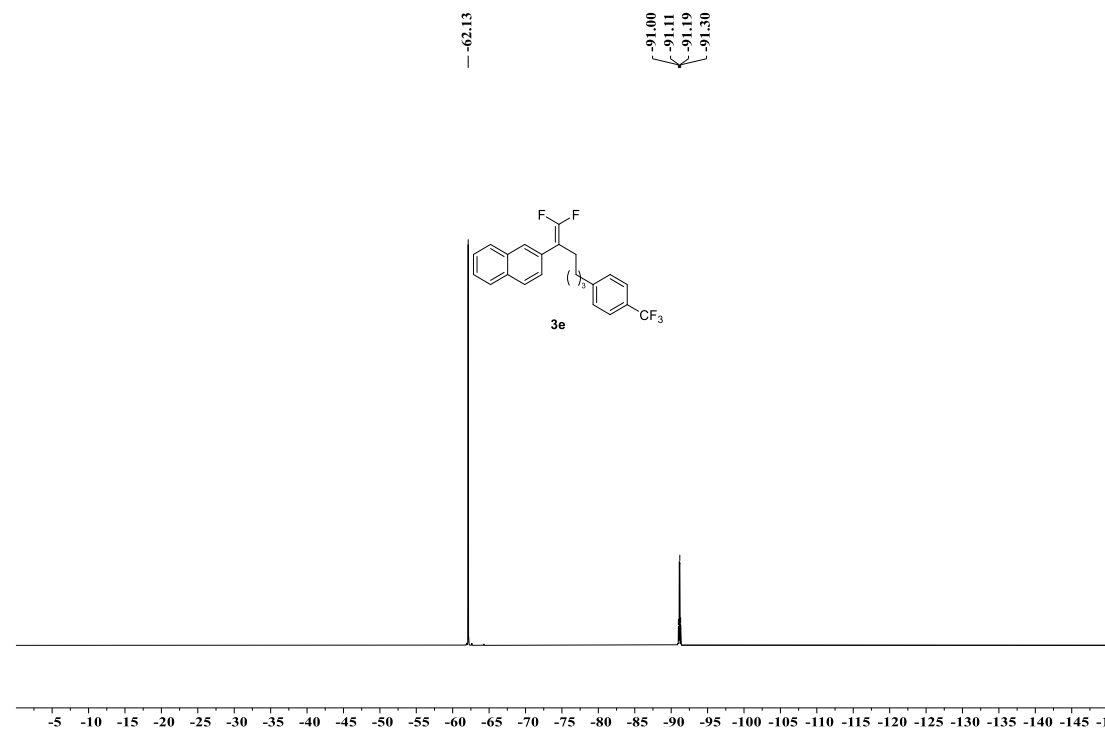

$^1\text{H}$  NMR (400 MHz,  $\text{CDCl}_3$ )

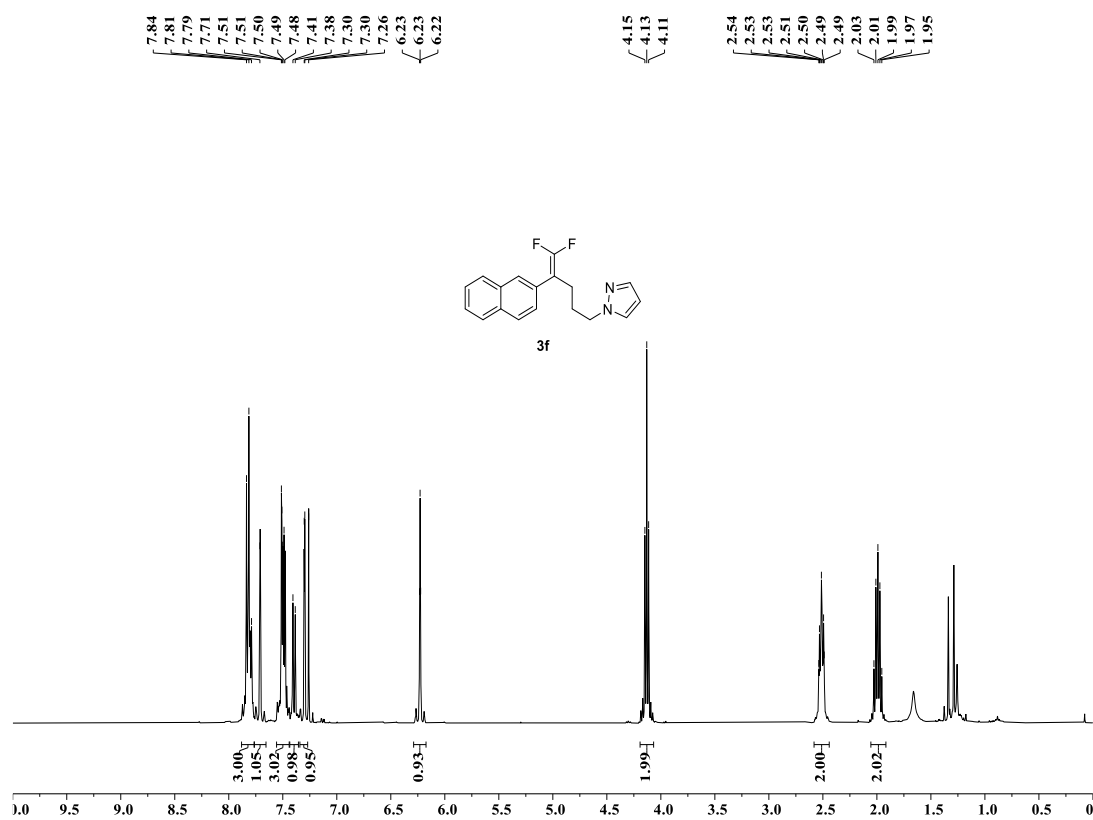

$^{13}\text{C}$  NMR (100 MHz,  $\text{CDCl}_3$ )

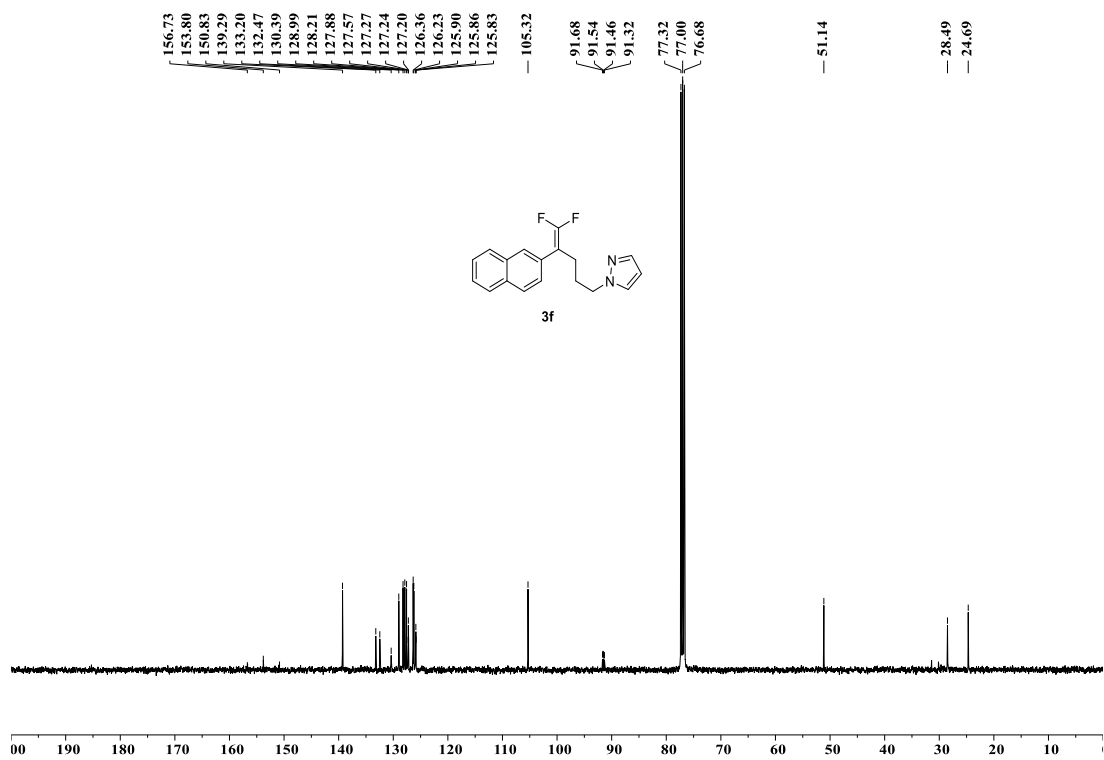

$^{19}\text{F}$  NMR (376 MHz,  $\text{CDCl}_3$ )

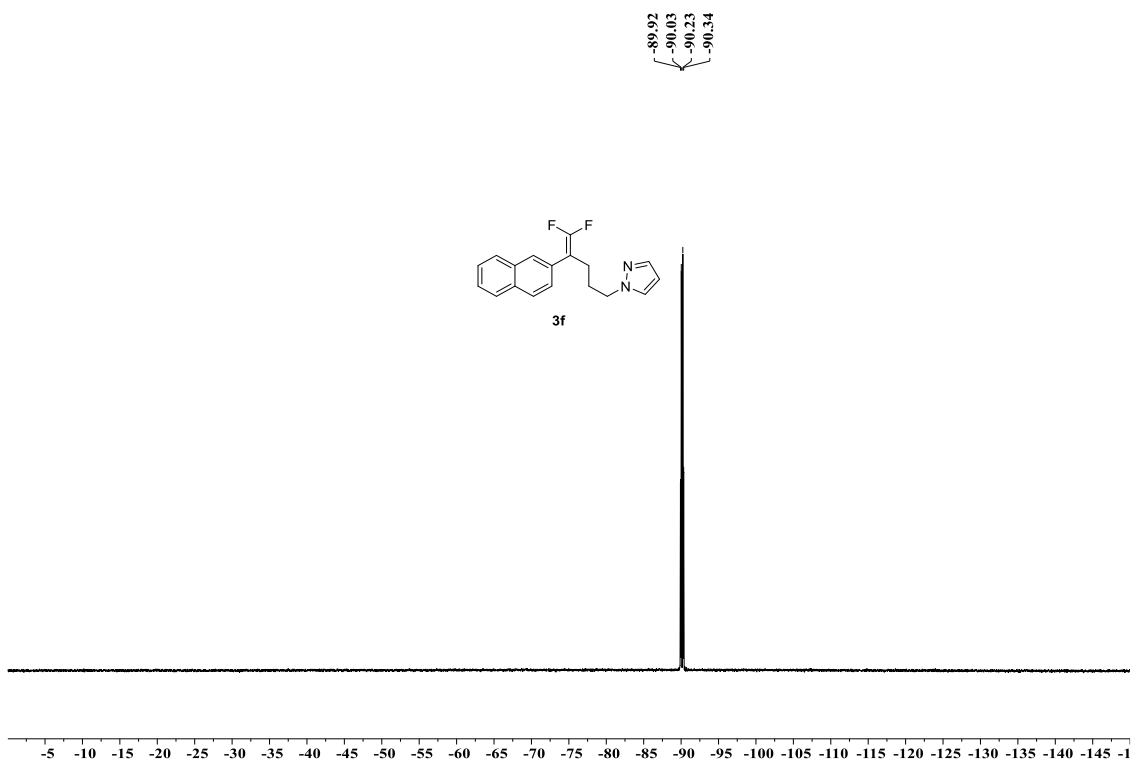

$^1\text{H}$  NMR (400 MHz,  $\text{CDCl}_3$ )

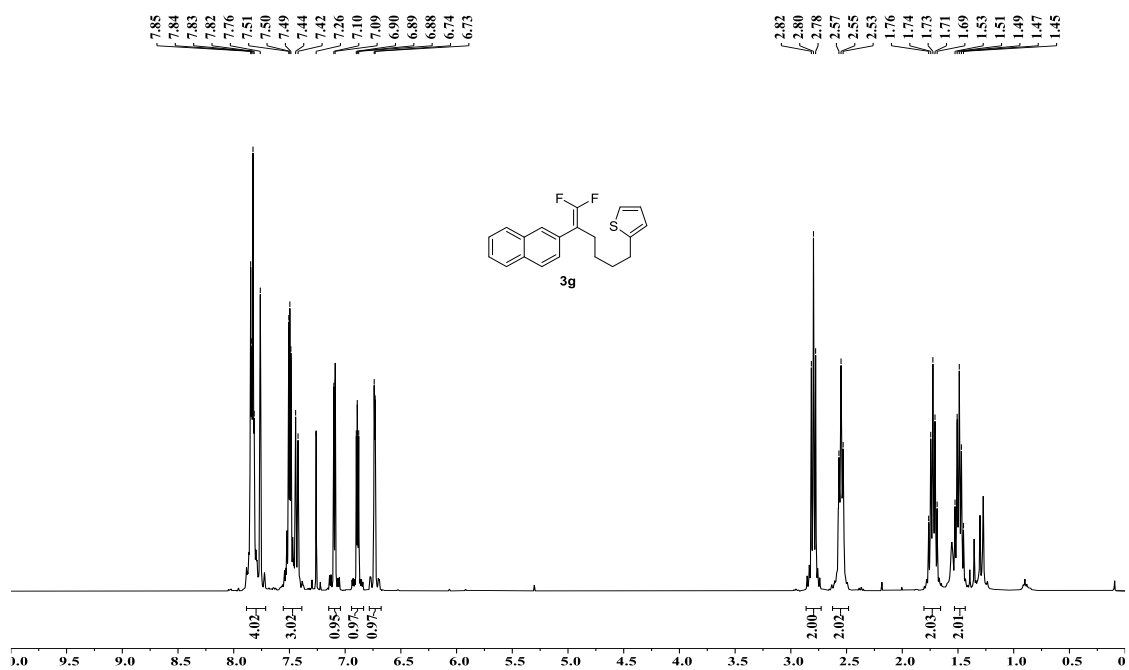



$^{13}\text{C}$  NMR (100 MHz,  $\text{CDCl}_3$ )

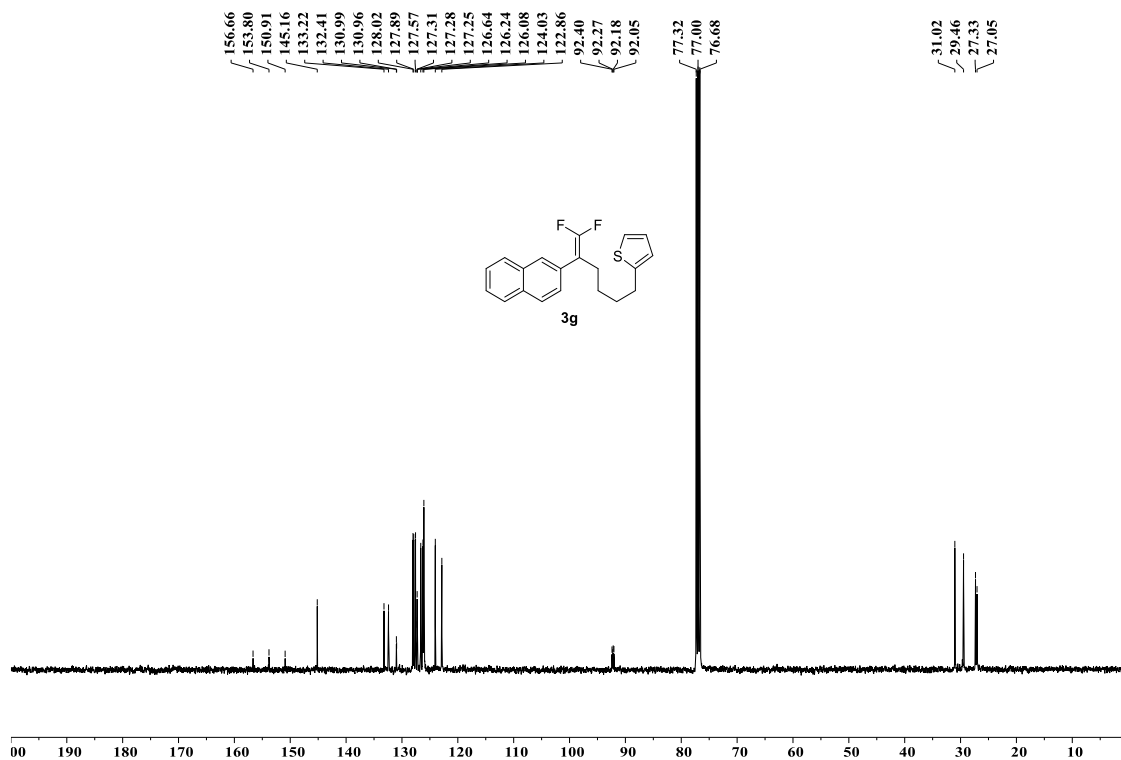

$^{19}\text{F}$  NMR (376 MHz,  $\text{CDCl}_3$ )

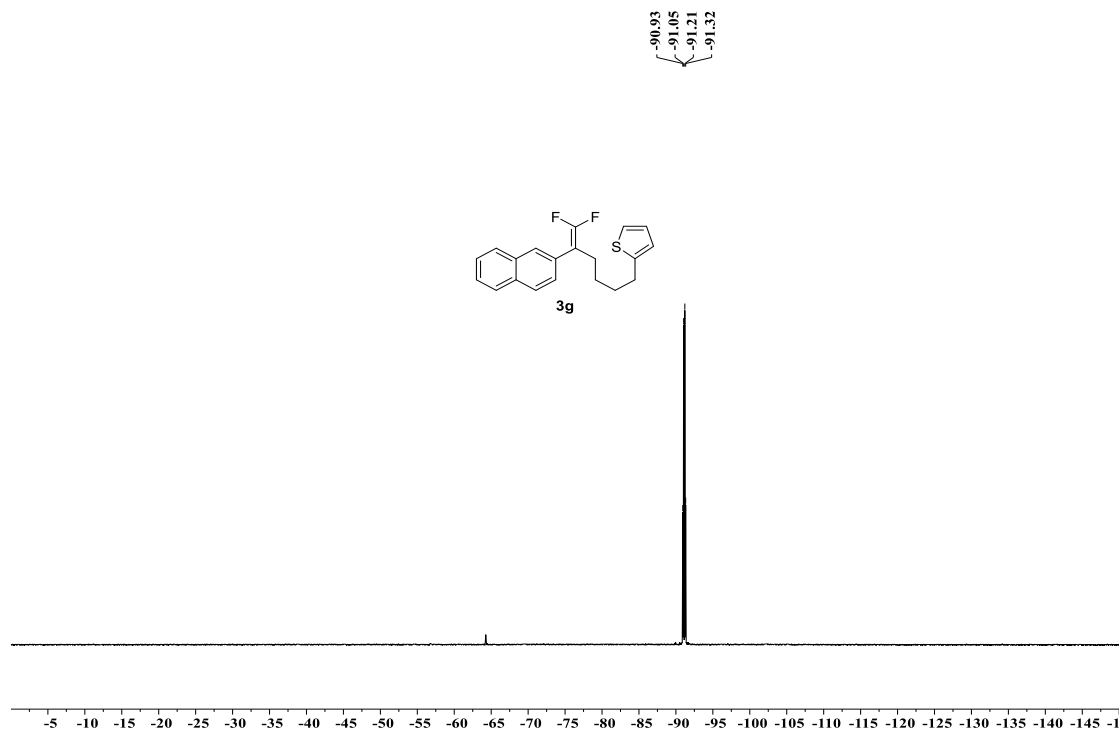

$^1\text{H}$  NMR (400 MHz,  $\text{CDCl}_3$ )

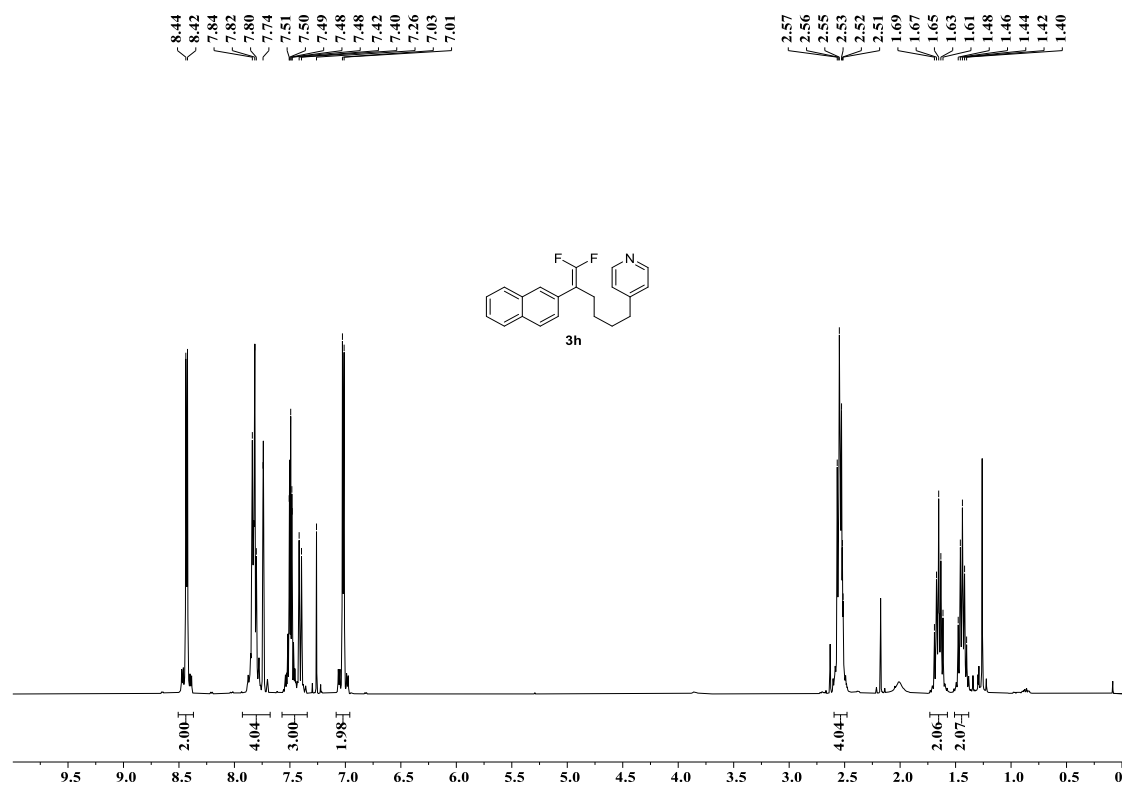

$^{13}\text{C}$  NMR (100 MHz,  $\text{CDCl}_3$ )

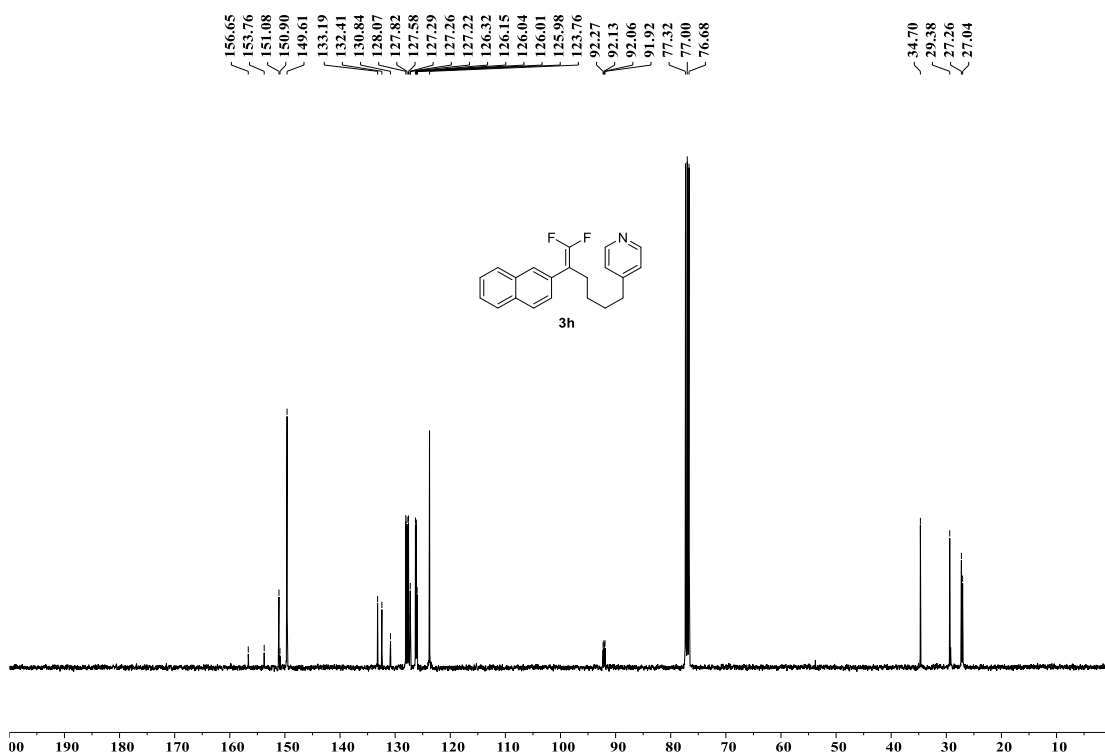

$^{19}\text{F}$  NMR (376 MHz,  $\text{CDCl}_3$ )

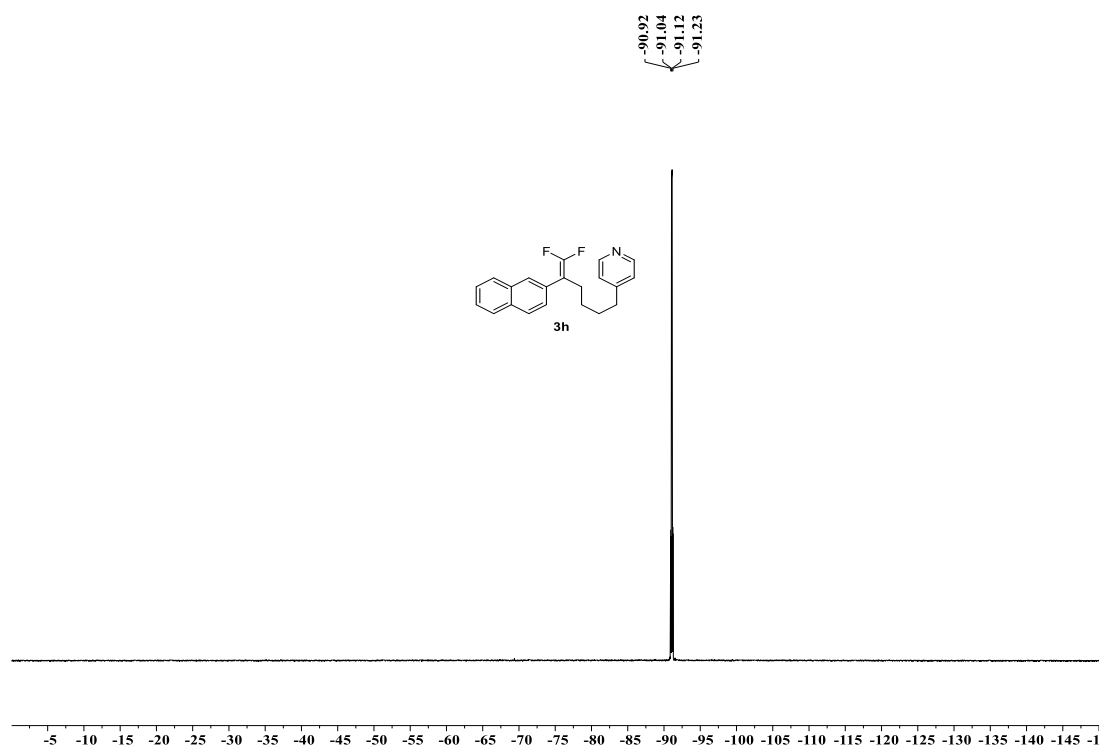

$^1\text{H}$  NMR (400 MHz,  $\text{CDCl}_3$ )

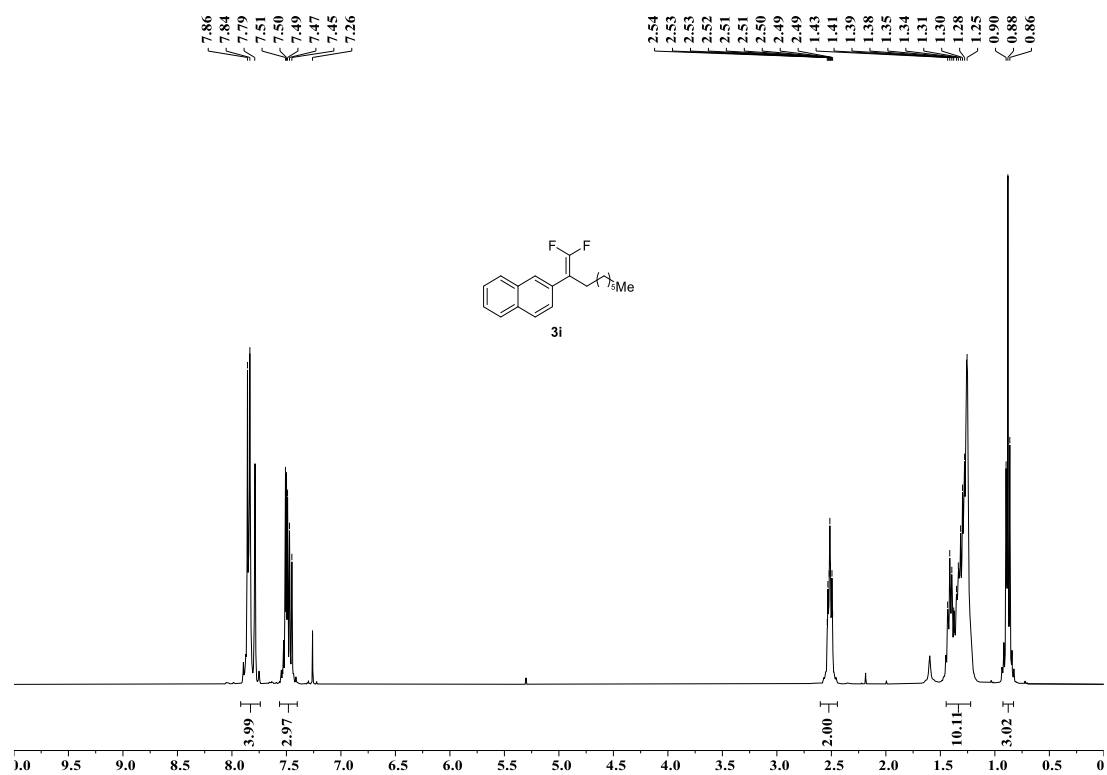

$^{13}\text{C}$  NMR (100 MHz,  $\text{CDCl}_3$ )

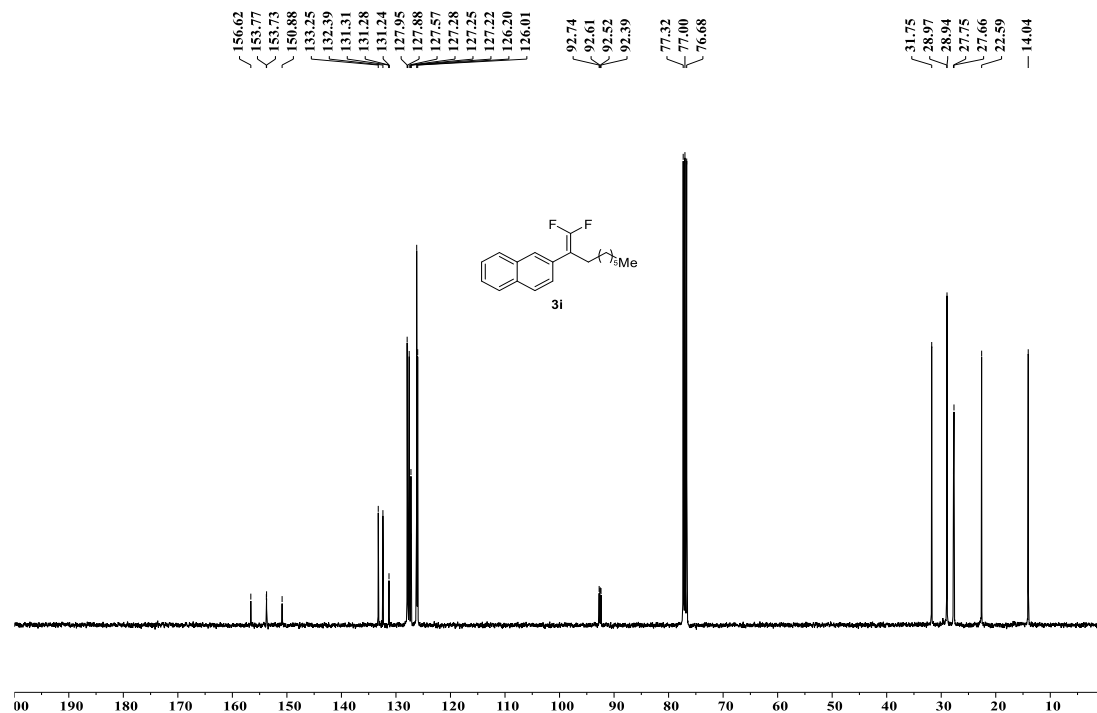

$^{19}\text{F}$  NMR (376 MHz,  $\text{CDCl}_3$ )

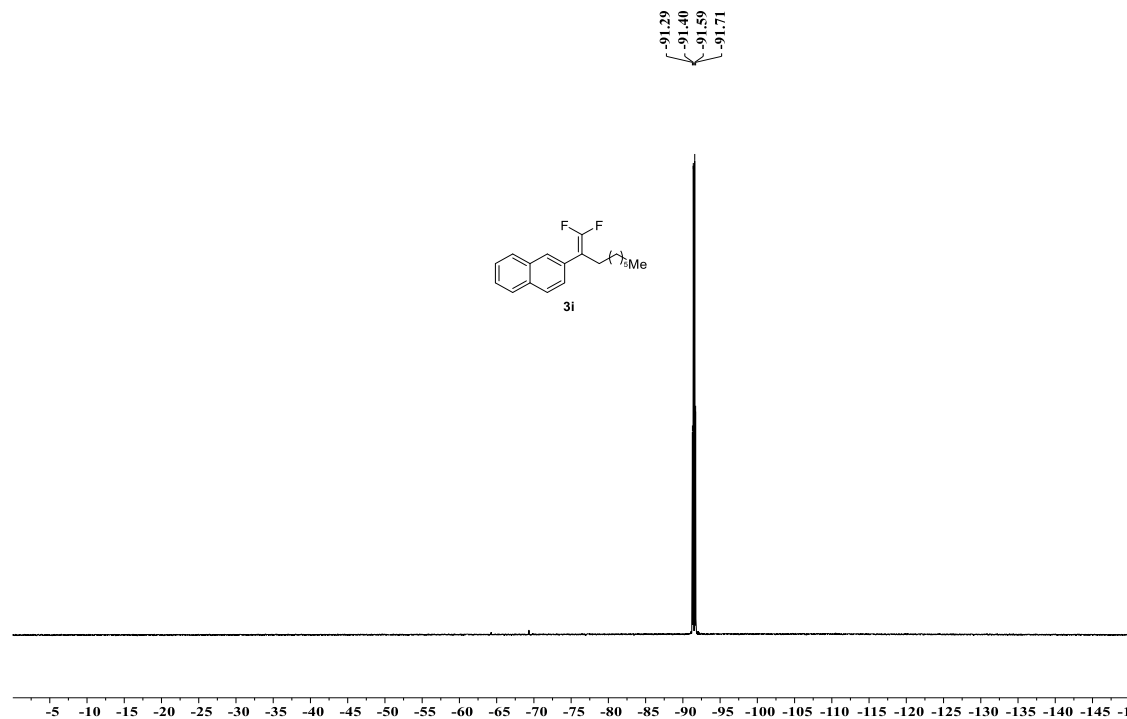

$^1\text{H}$  NMR (400 MHz,  $\text{CDCl}_3$ )

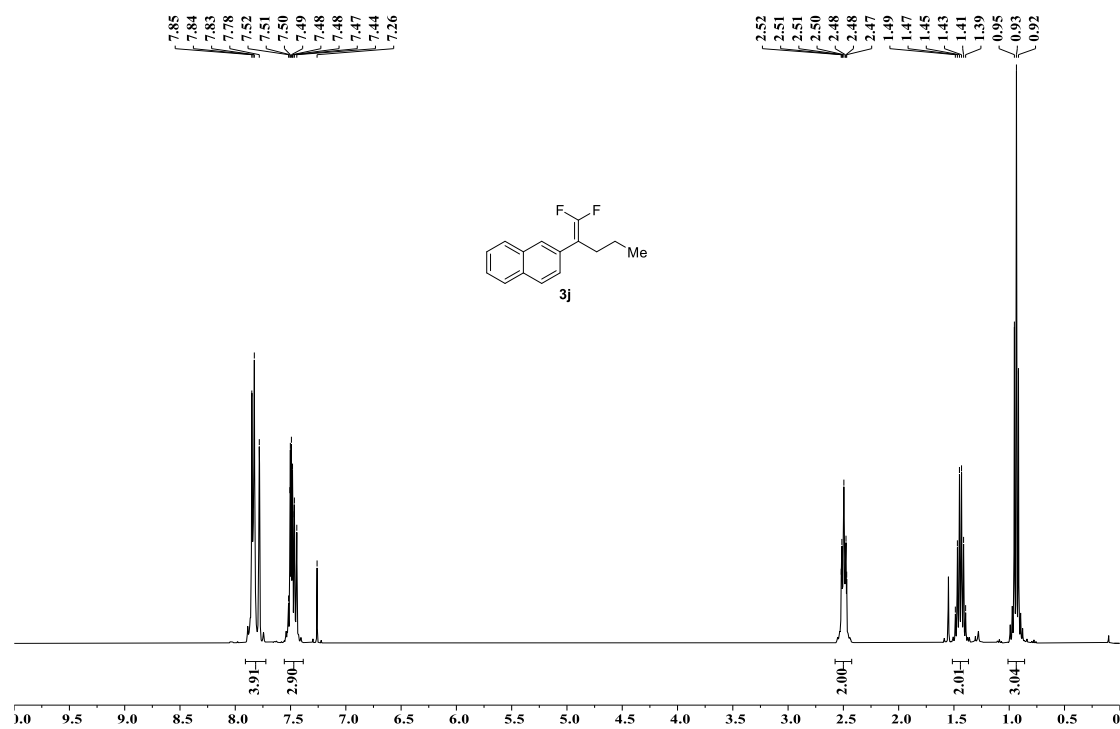

$^{13}\text{C}$  NMR (100 MHz,  $\text{CDCl}_3$ )

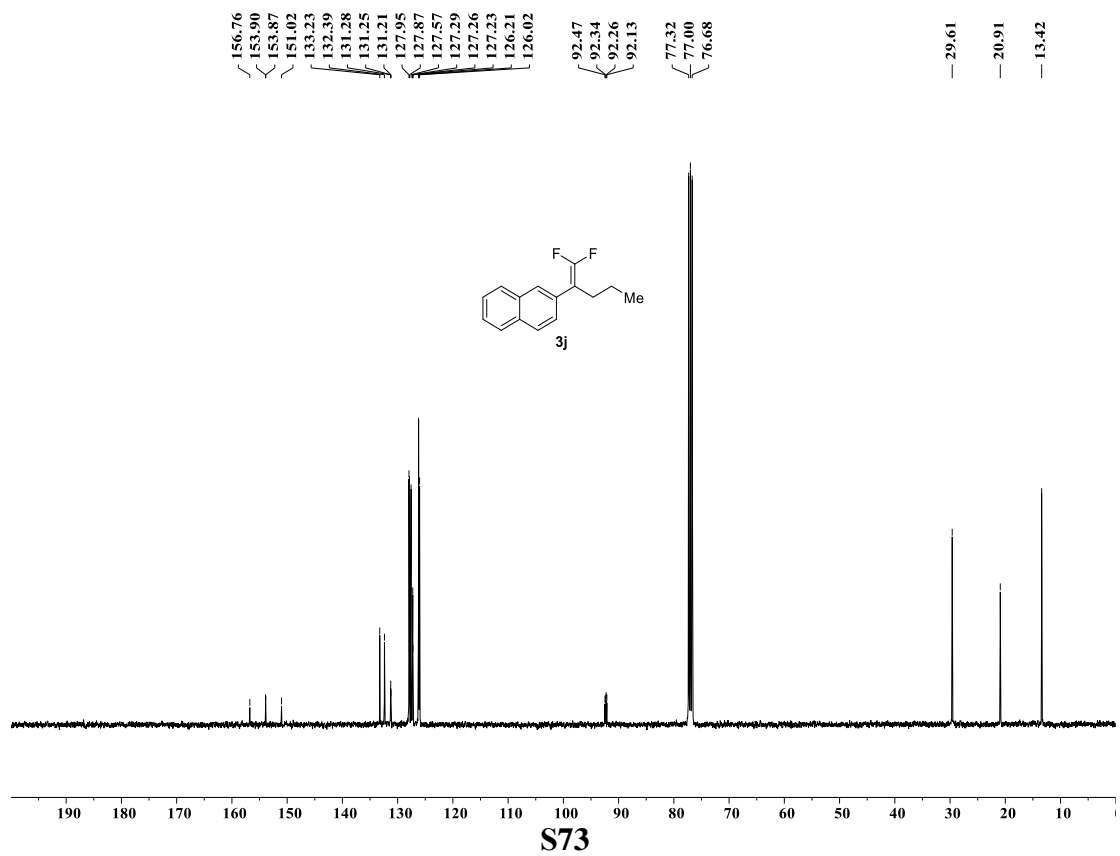

$^{19}\text{F}$  NMR (376 MHz,  $\text{CDCl}_3$ )

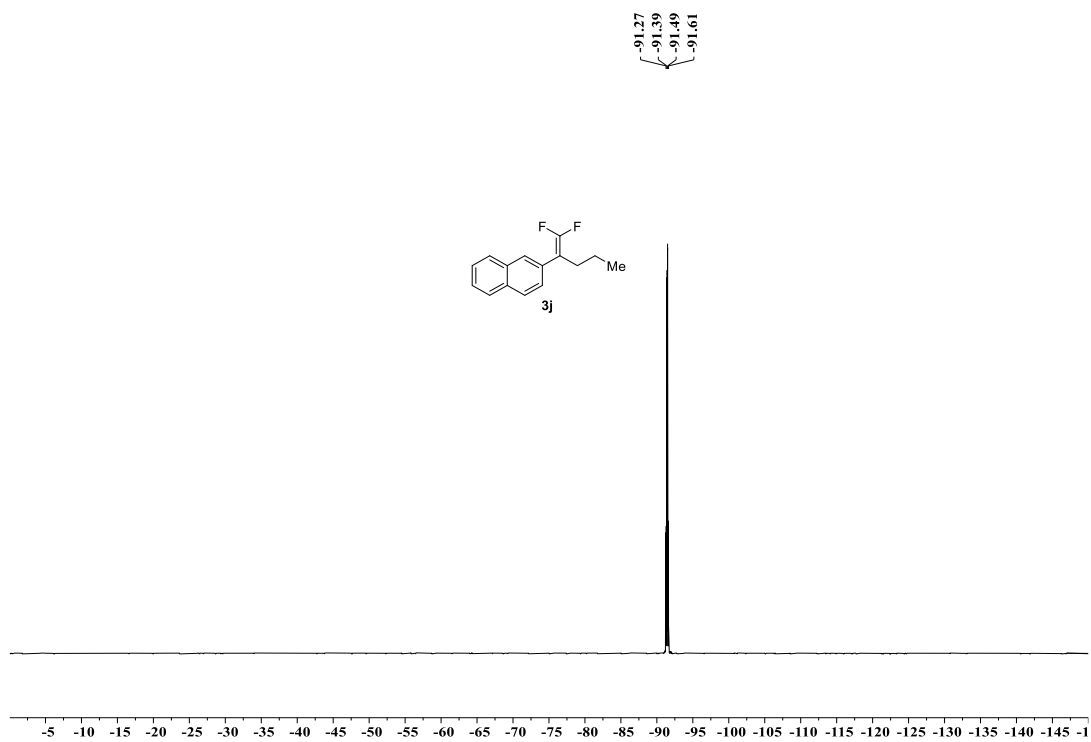

$^1\text{H}$  NMR (400 MHz,  $\text{CDCl}_3$ )

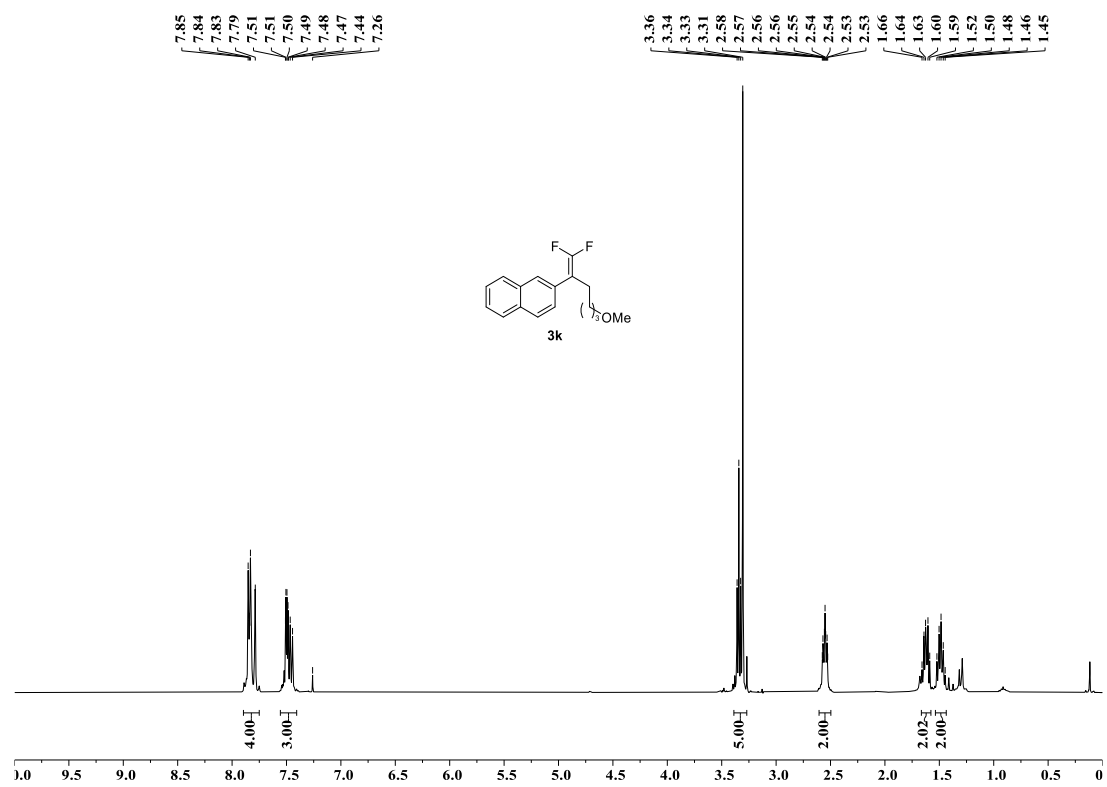

$^{13}\text{C}$  NMR (100 MHz,  $\text{CDCl}_3$ )

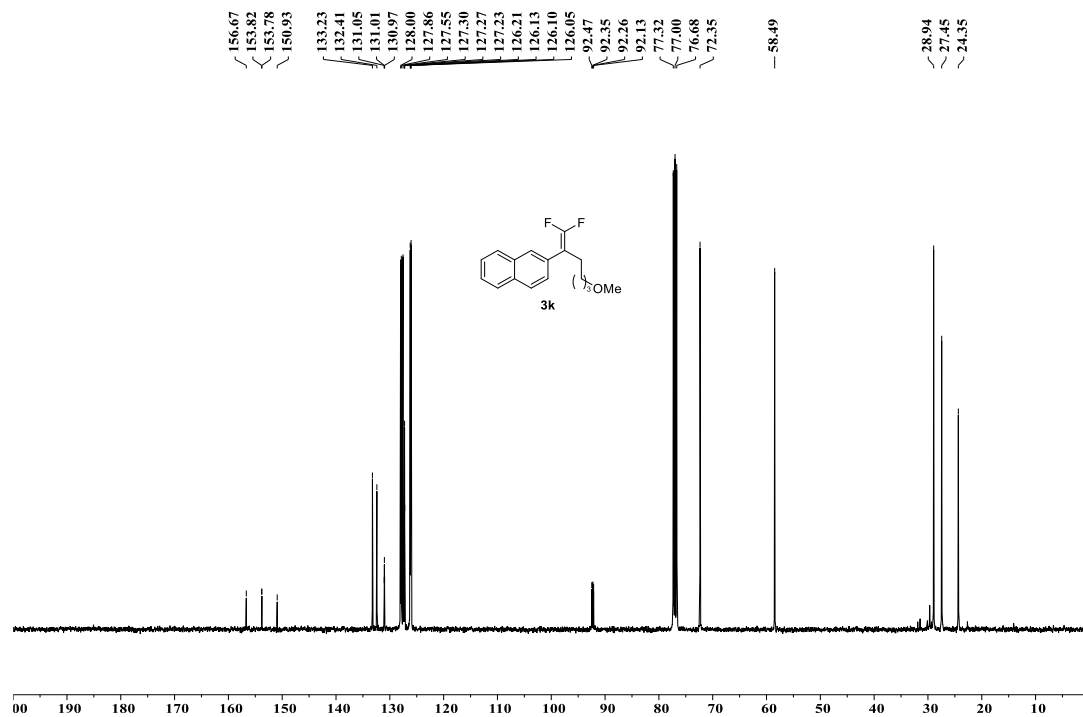

$^{19}\text{F}$  NMR (376 MHz,  $\text{CDCl}_3$ )

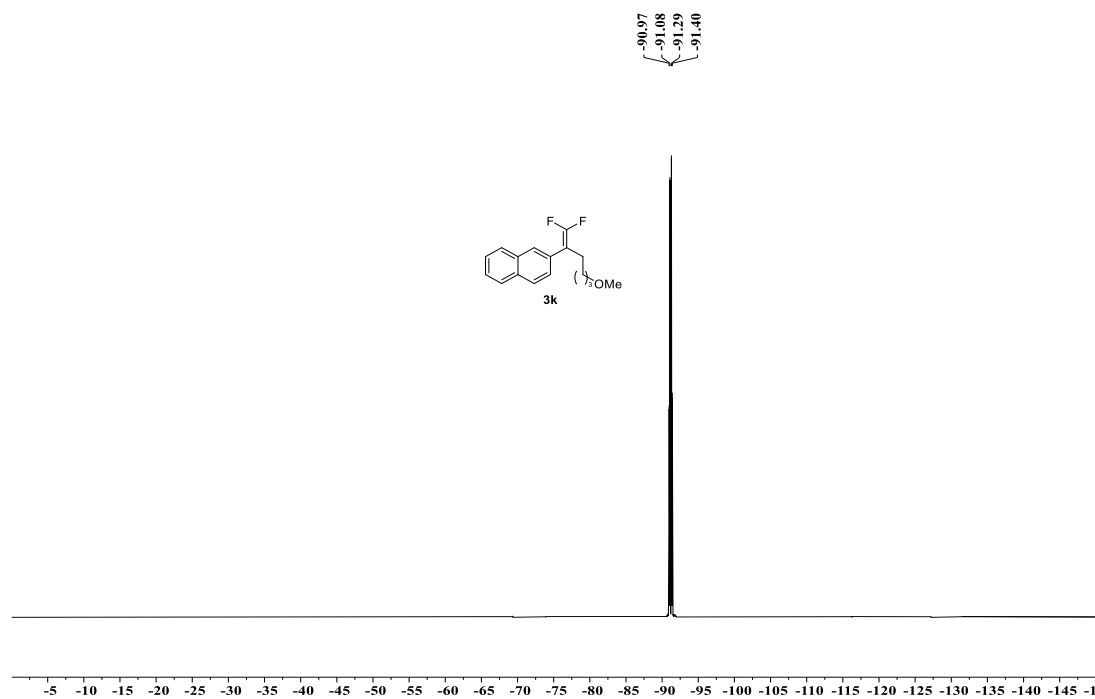

$^1\text{H}$  NMR (400 MHz,  $\text{CDCl}_3$ )

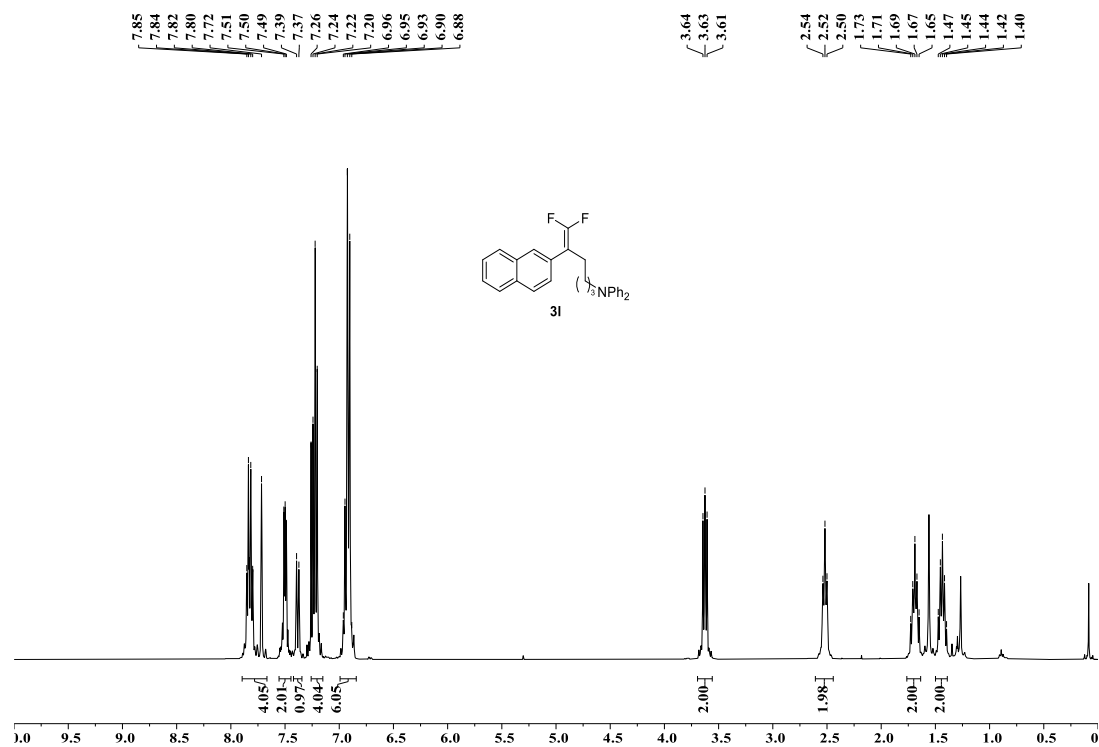

$^{13}\text{C}$  NMR (100 MHz,  $\text{CDCl}_3$ )

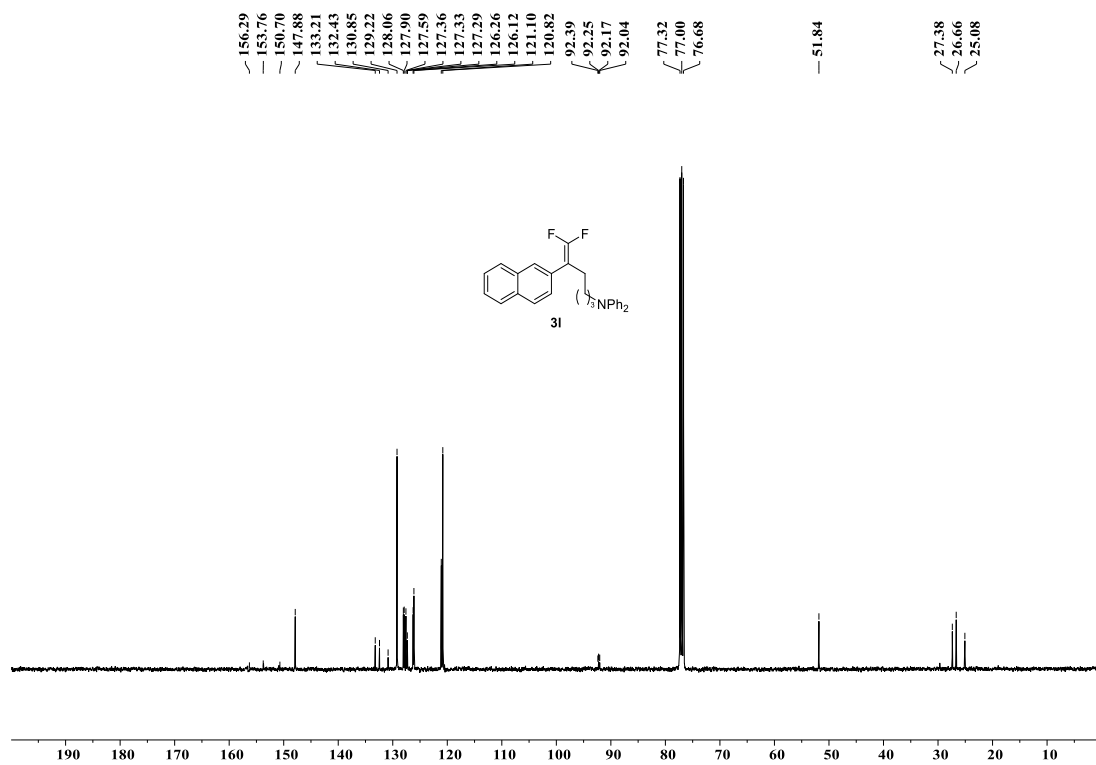



$^{19}\text{F}$  NMR (376 MHz,  $\text{CDCl}_3$ )

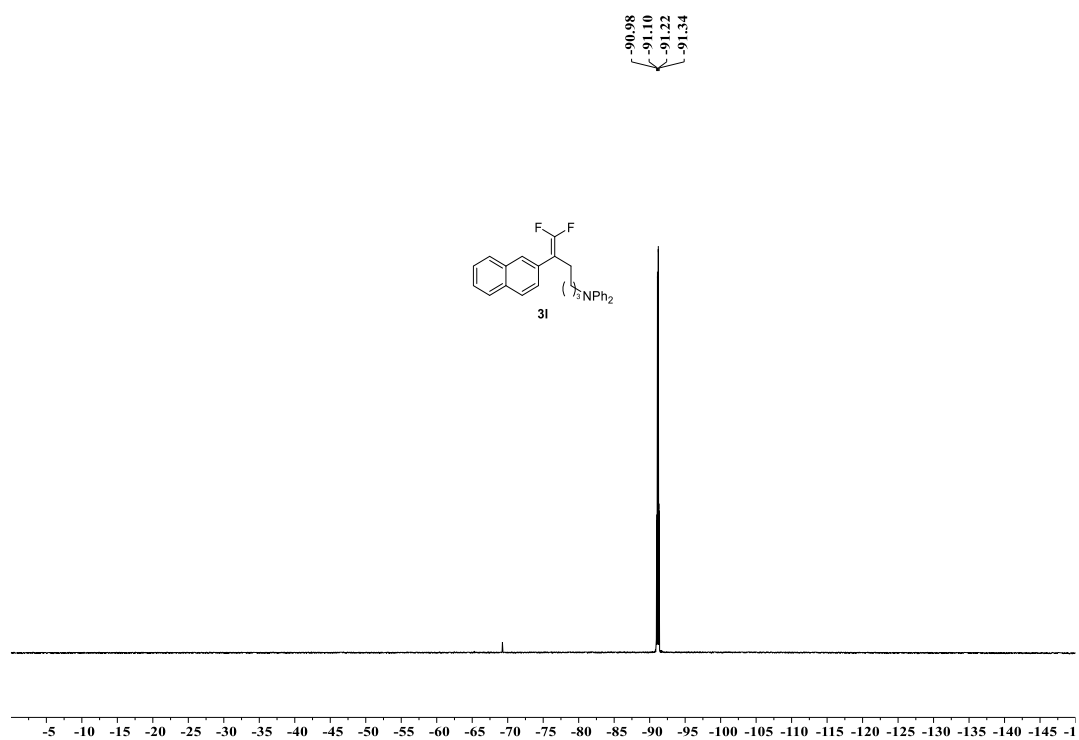

$^1\text{H}$  NMR (400 MHz,  $\text{CDCl}_3$ )

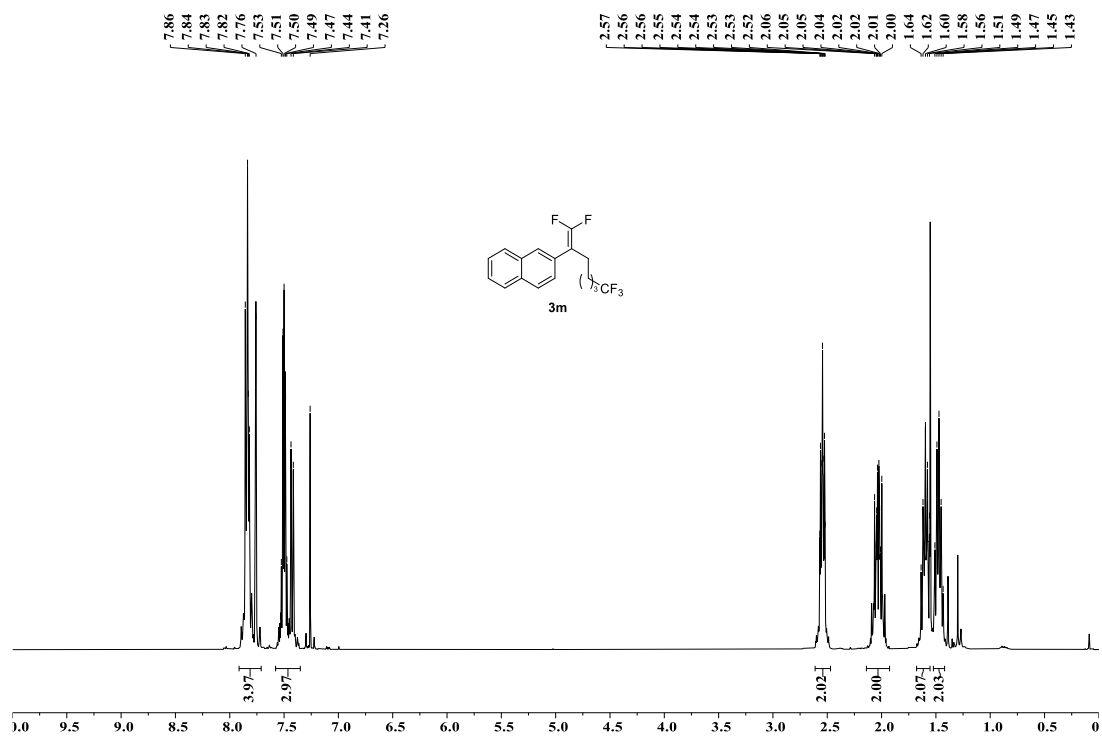

$^{13}\text{C}$  NMR (100 MHz,  $\text{CDCl}_3$ )

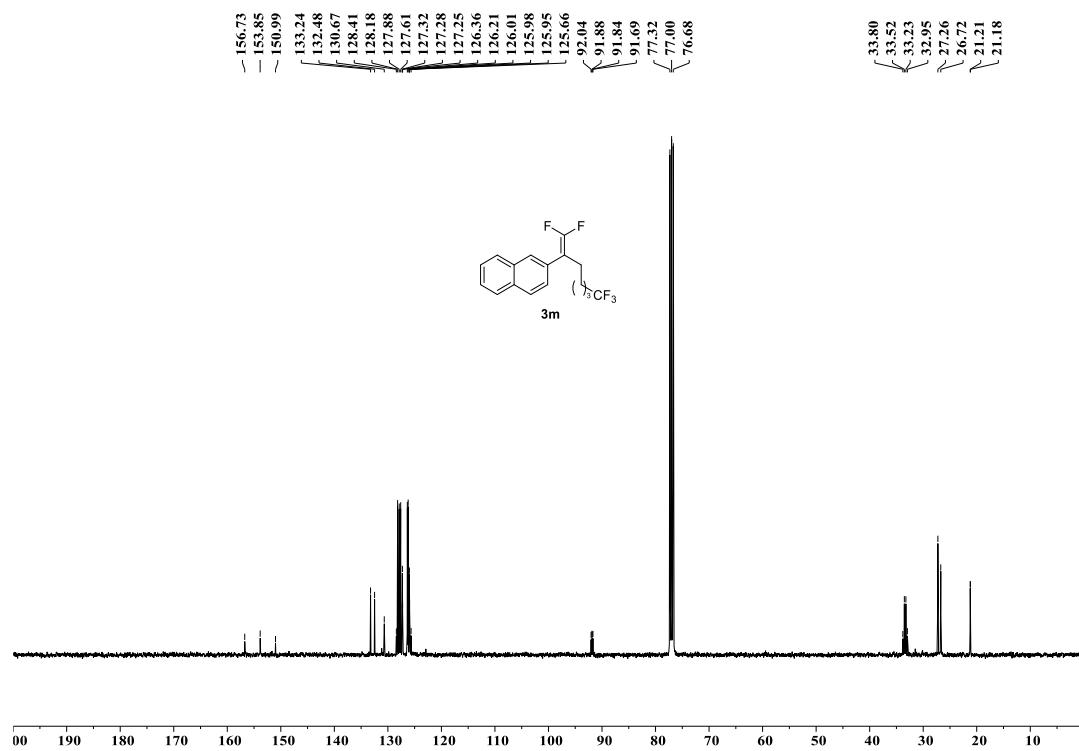

$^{19}\text{F}$  NMR (376 MHz,  $\text{CDCl}_3$ )

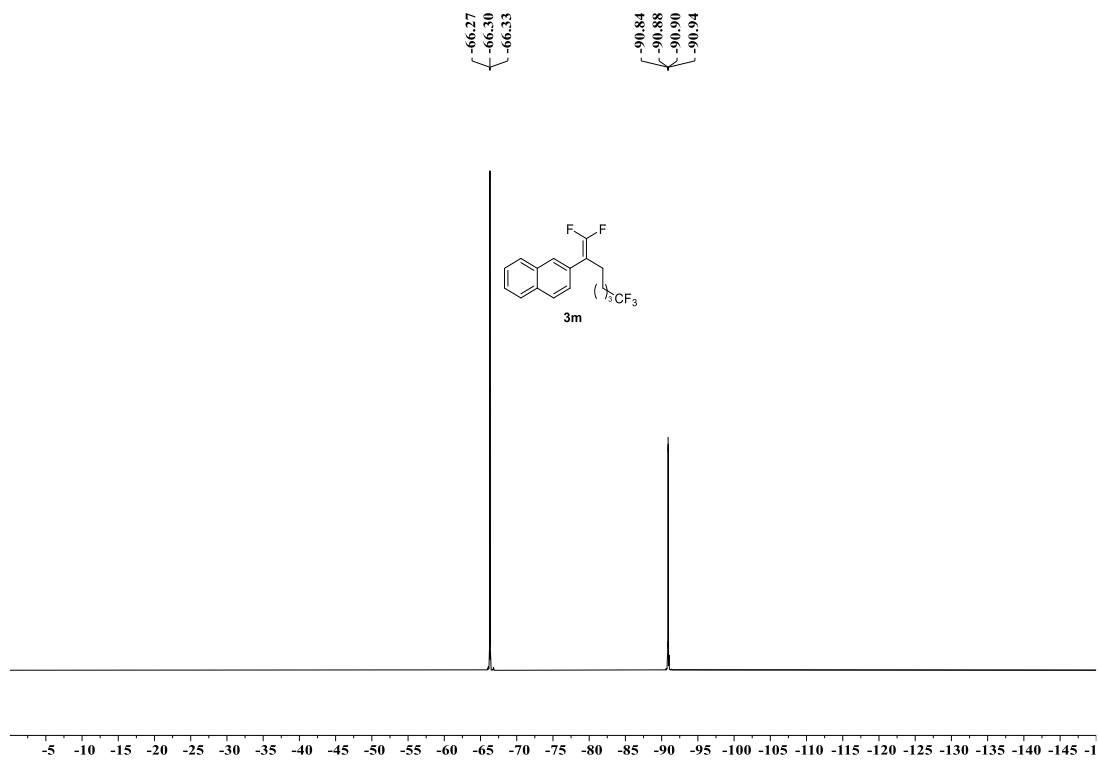

<sup>1</sup>H NMR (400 MHz, CDCl<sub>3</sub>)

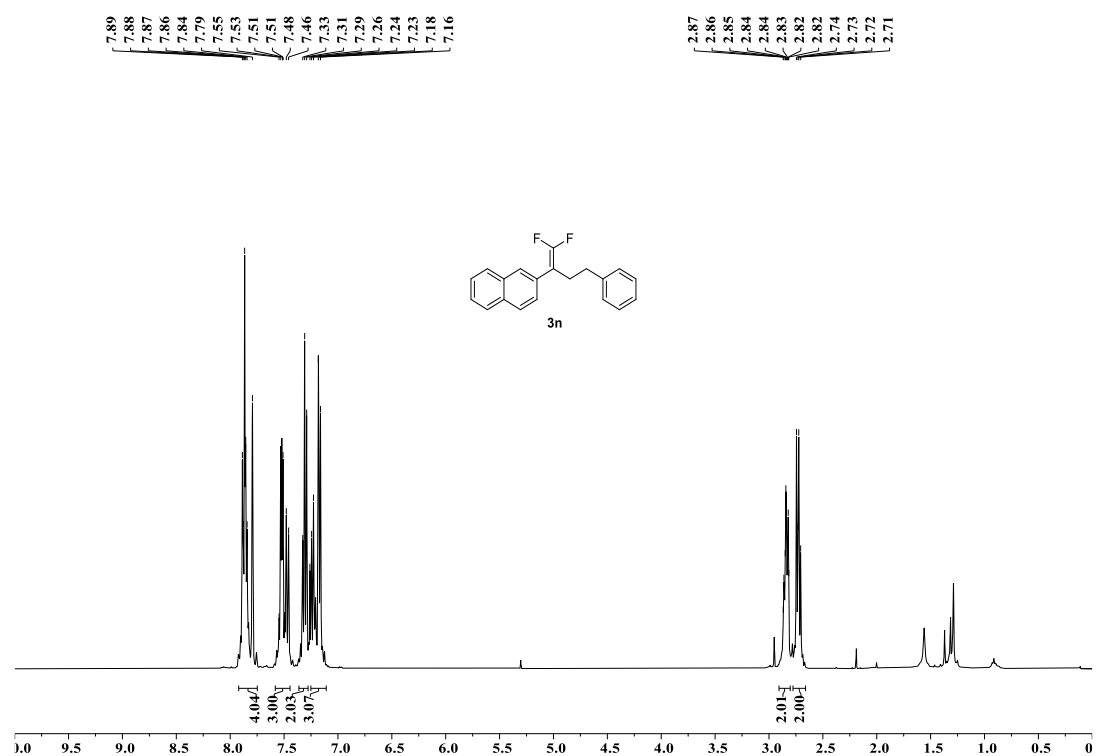

<sup>13</sup>C NMR (100 MHz, CDCl<sub>3</sub>)

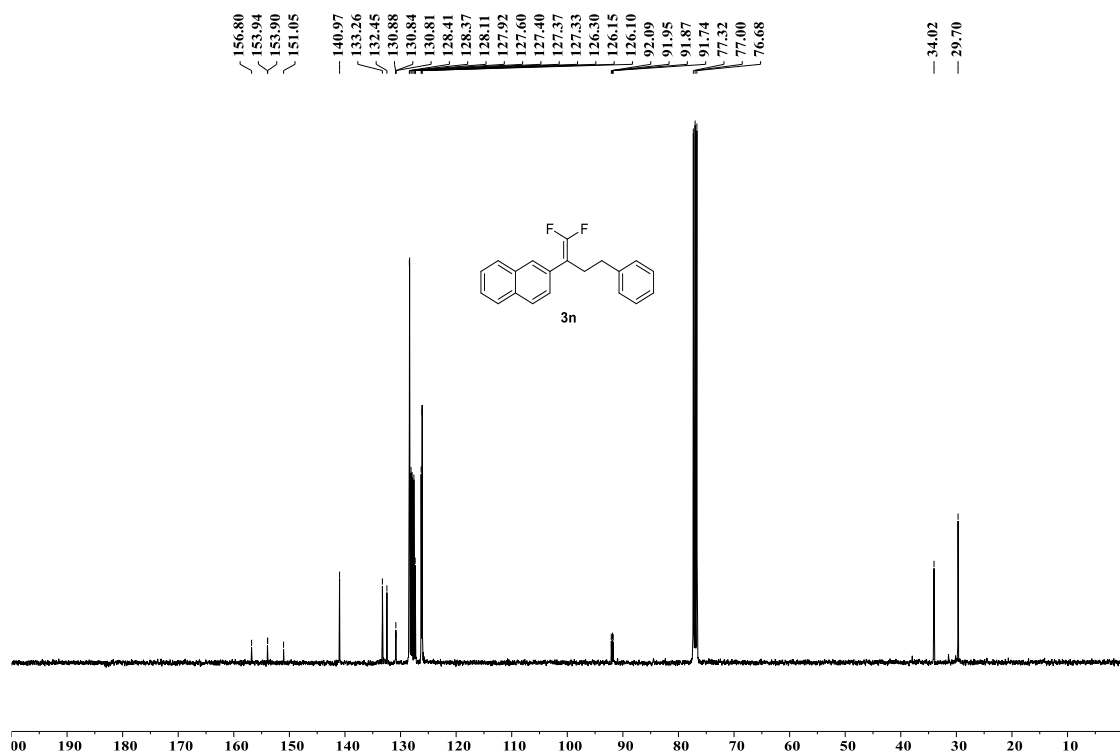

$^{19}\text{F}$  NMR (376 MHz,  $\text{CDCl}_3$ )

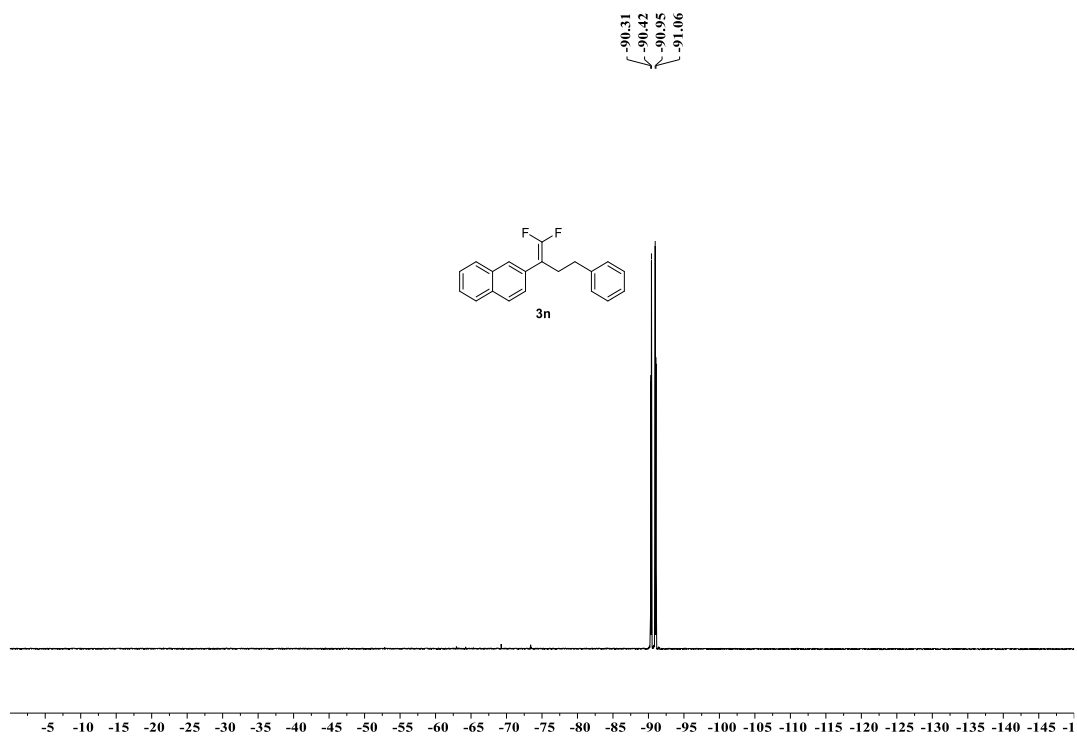

$^1\text{H}$  NMR (400 MHz,  $\text{CDCl}_3$ )

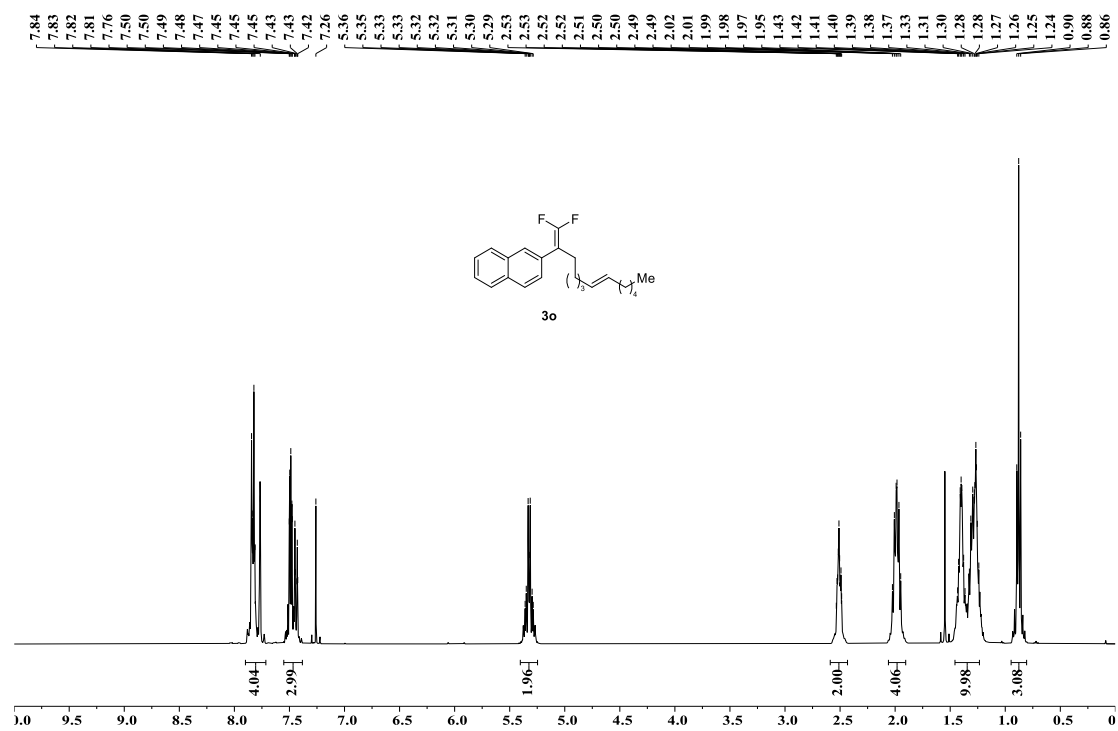

$^{13}\text{C}$  NMR (100 MHz,  $\text{CDCl}_3$ )

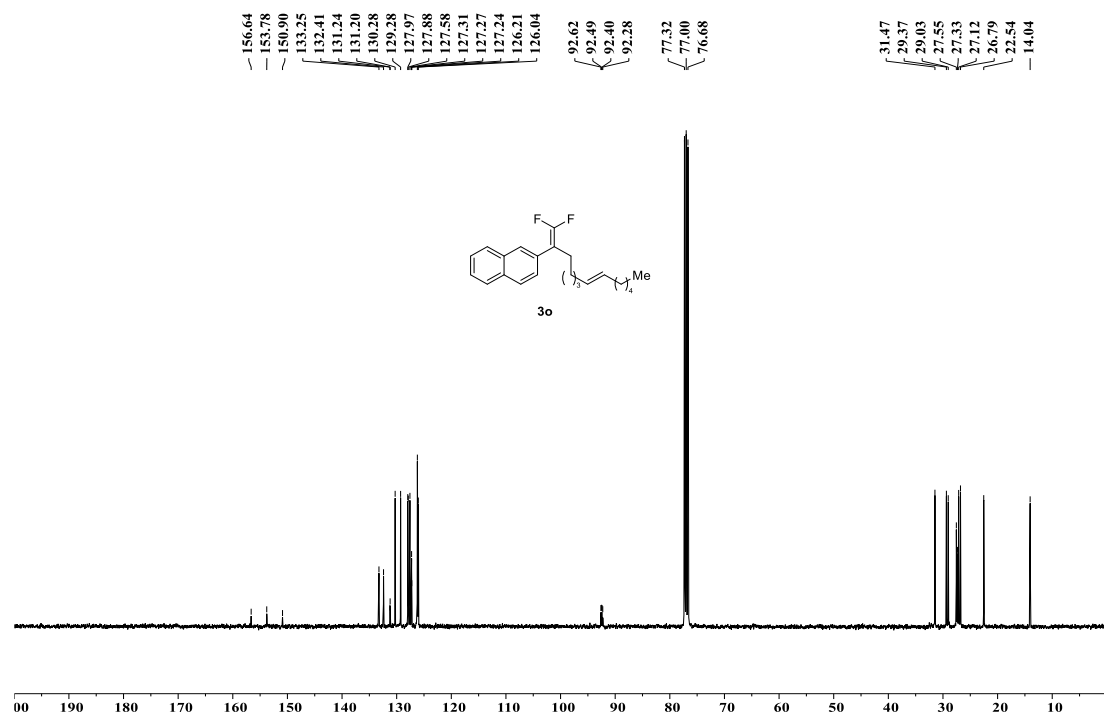

$^{19}\text{F}$  NMR (376 MHz,  $\text{CDCl}_3$ )

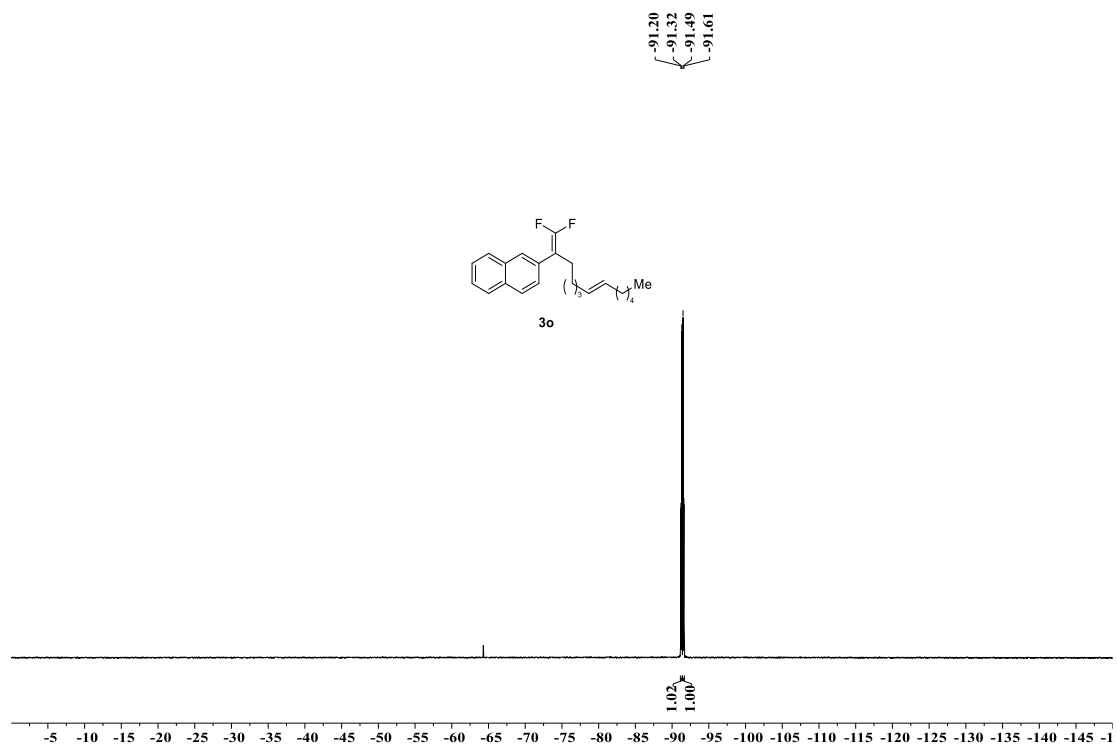

$^1\text{H}$  NMR (400 MHz,  $\text{CDCl}_3$ )

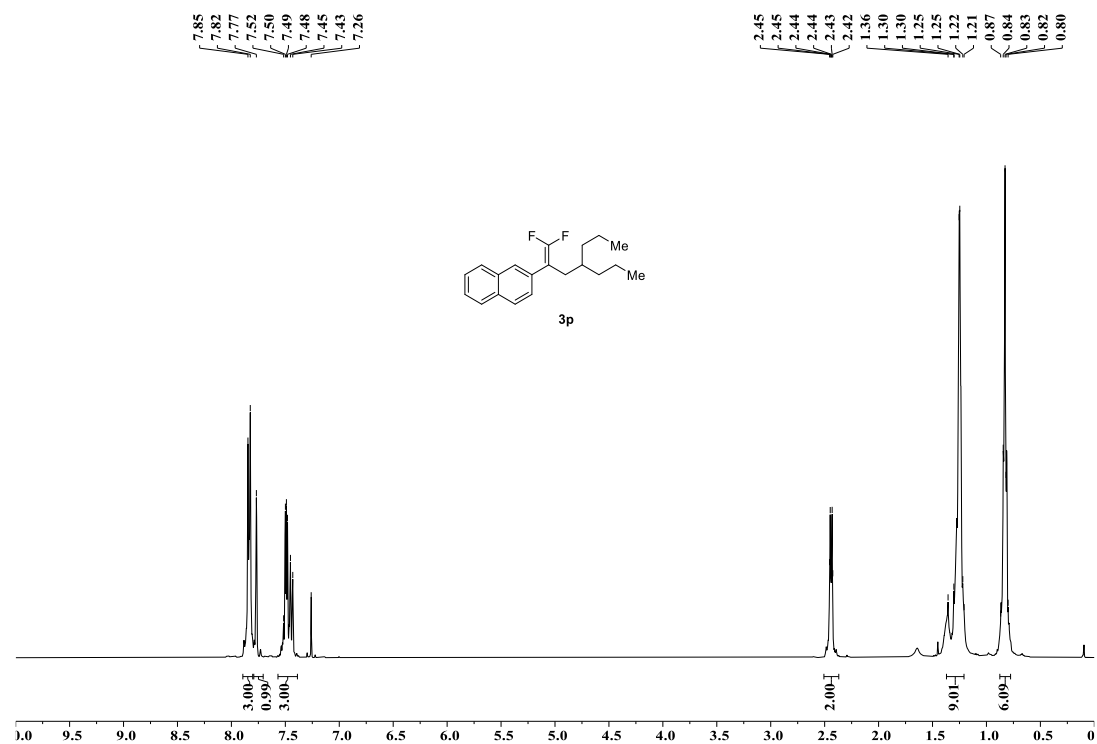

$^{13}\text{C}$  NMR (100 MHz,  $\text{CDCl}_3$ )

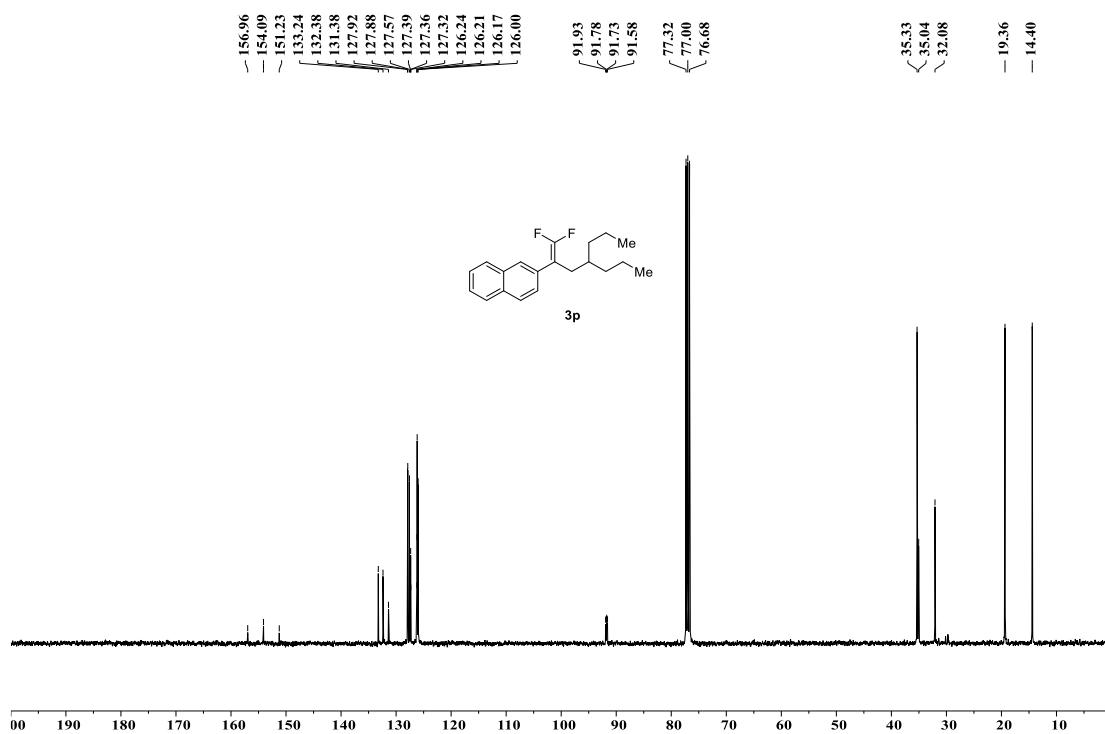

$^{19}\text{F}$  NMR (376 MHz,  $\text{CDCl}_3$ )

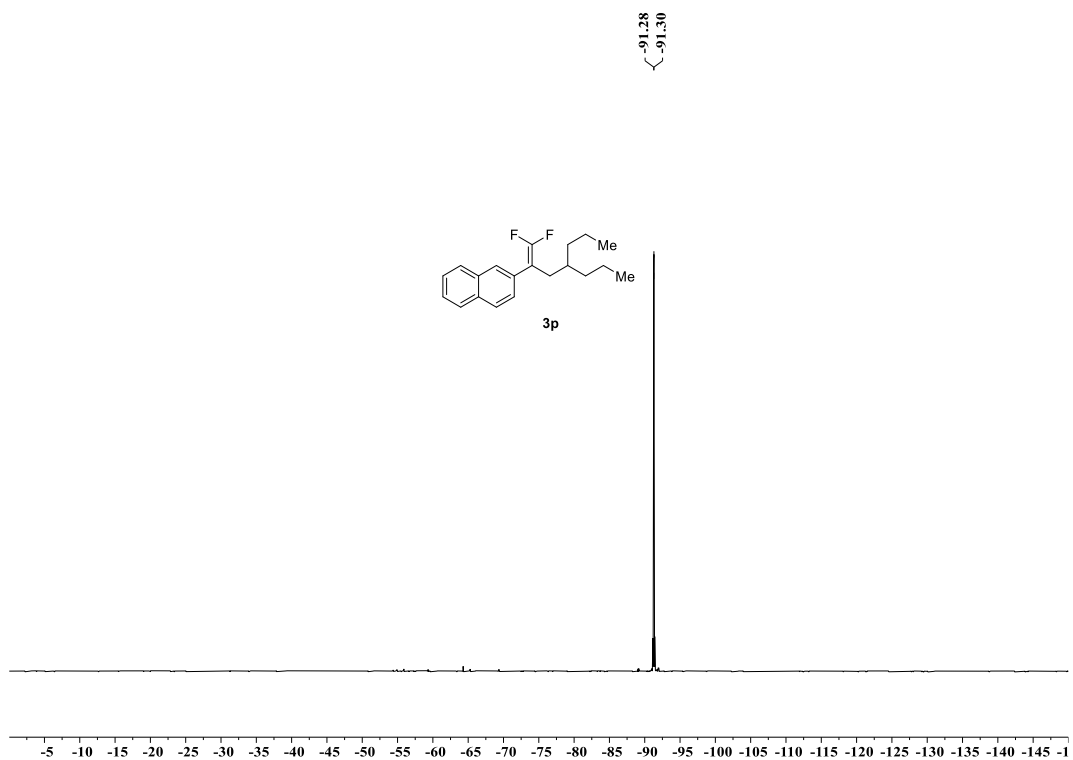

$^1\text{H}$  NMR (400 MHz,  $\text{CDCl}_3$ )

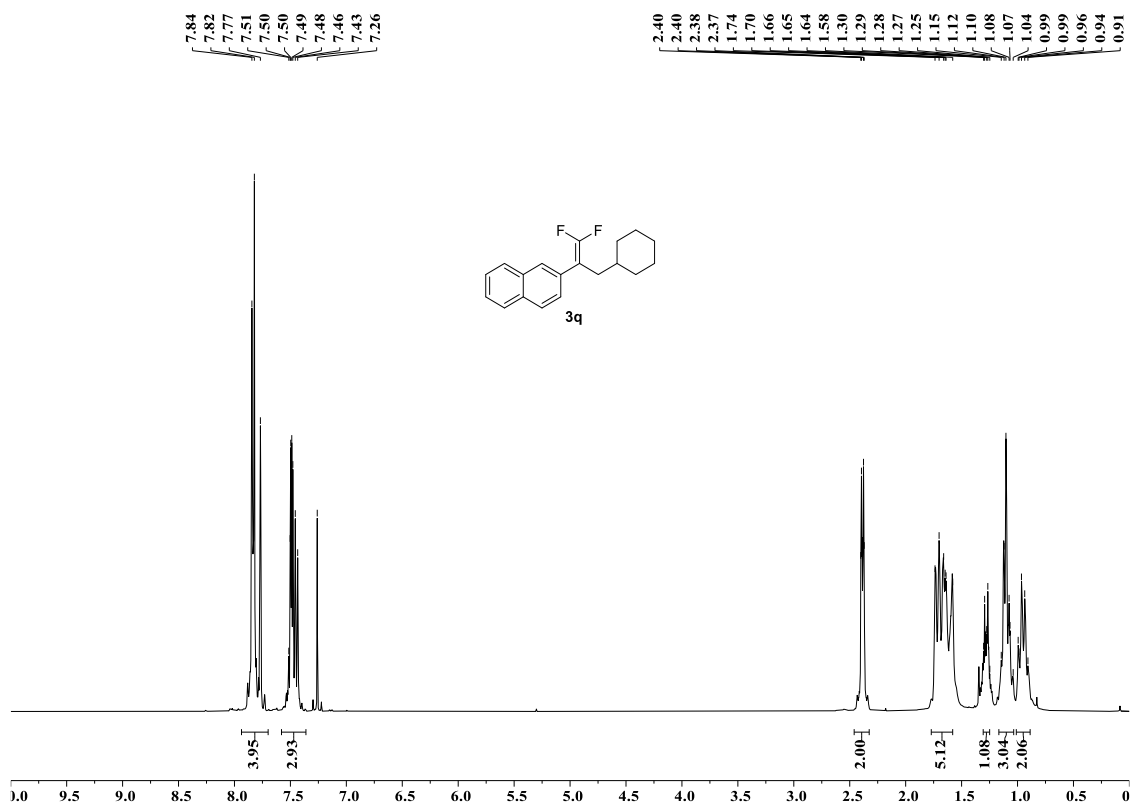

$^{13}\text{C}$  NMR (100 MHz,  $\text{CDCl}_3$ )

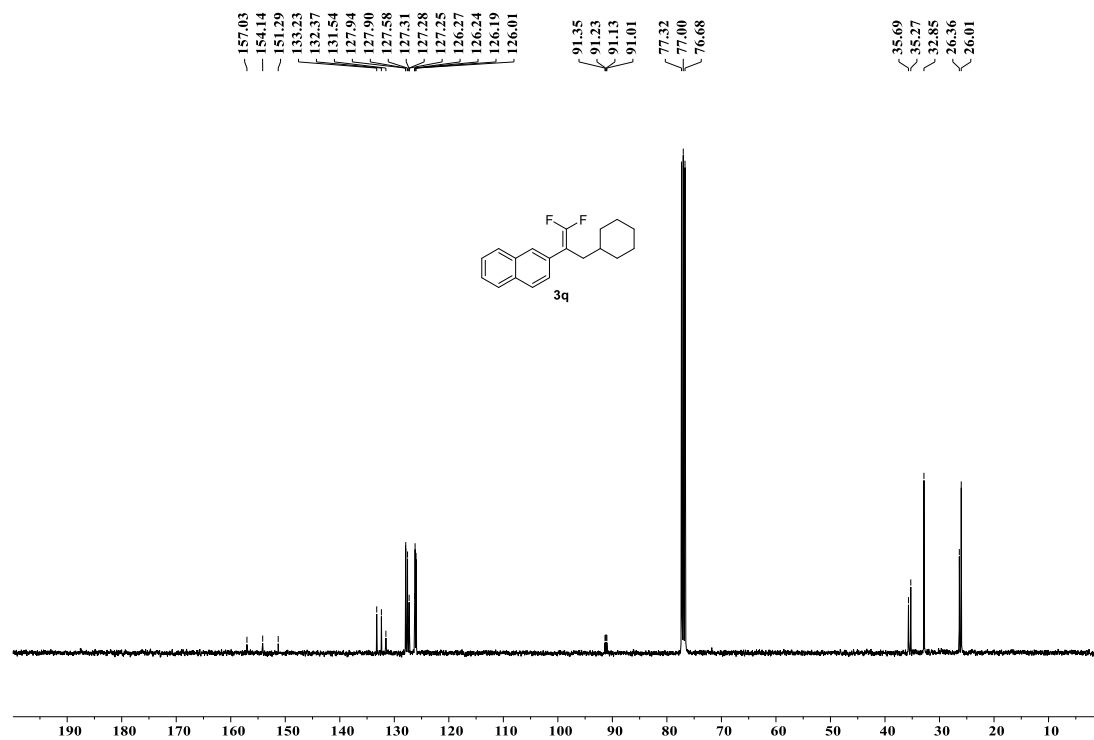

$^{19}\text{F}$  NMR (376 MHz,  $\text{CDCl}_3$ )

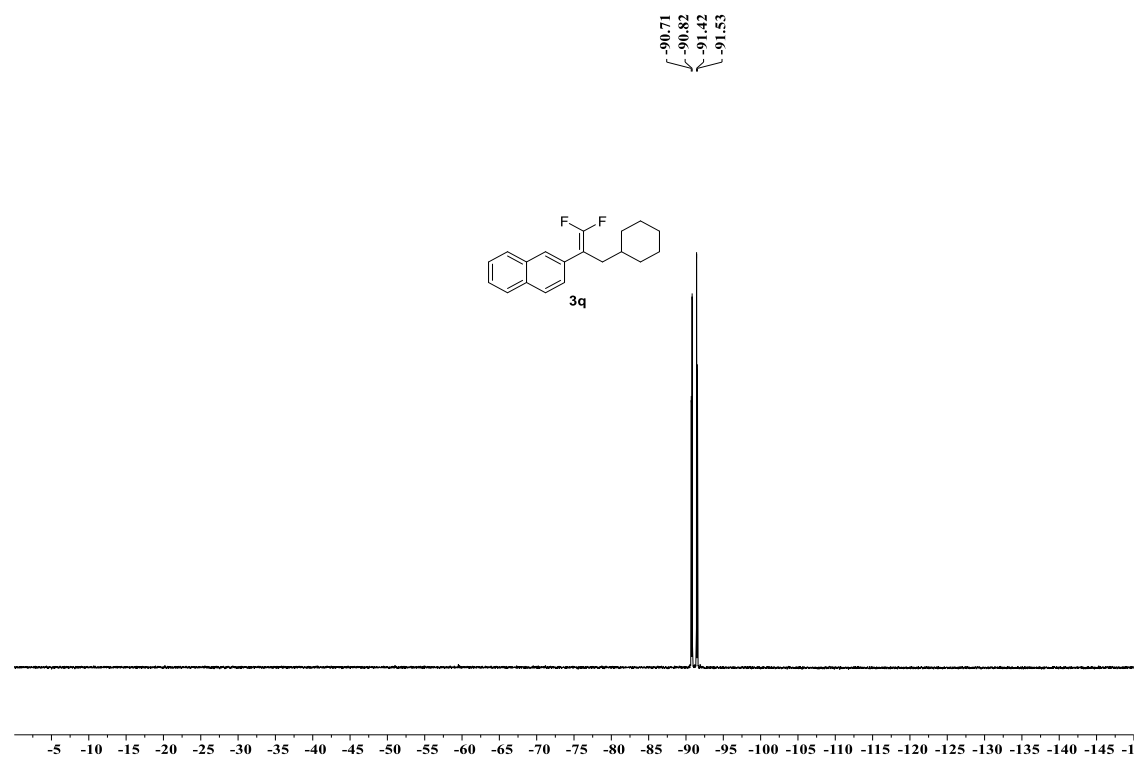



$^1\text{H}$  NMR (400 MHz,  $\text{CDCl}_3$ )

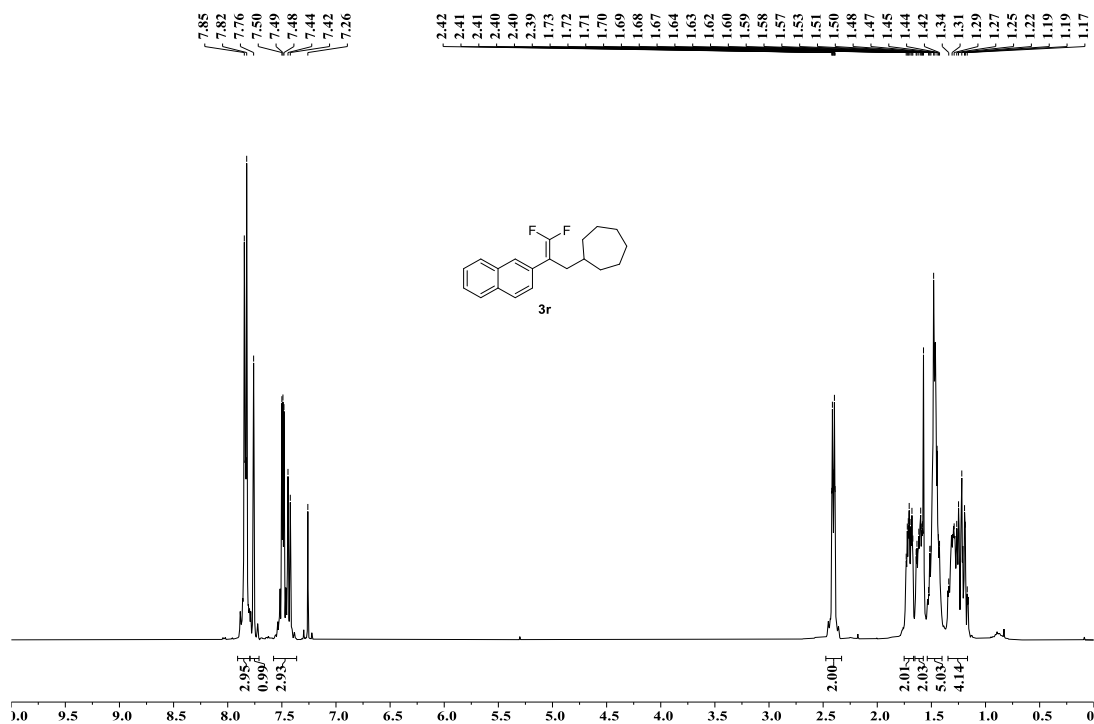

$^{13}\text{C}$  NMR (100 MHz,  $\text{CDCl}_3$ )

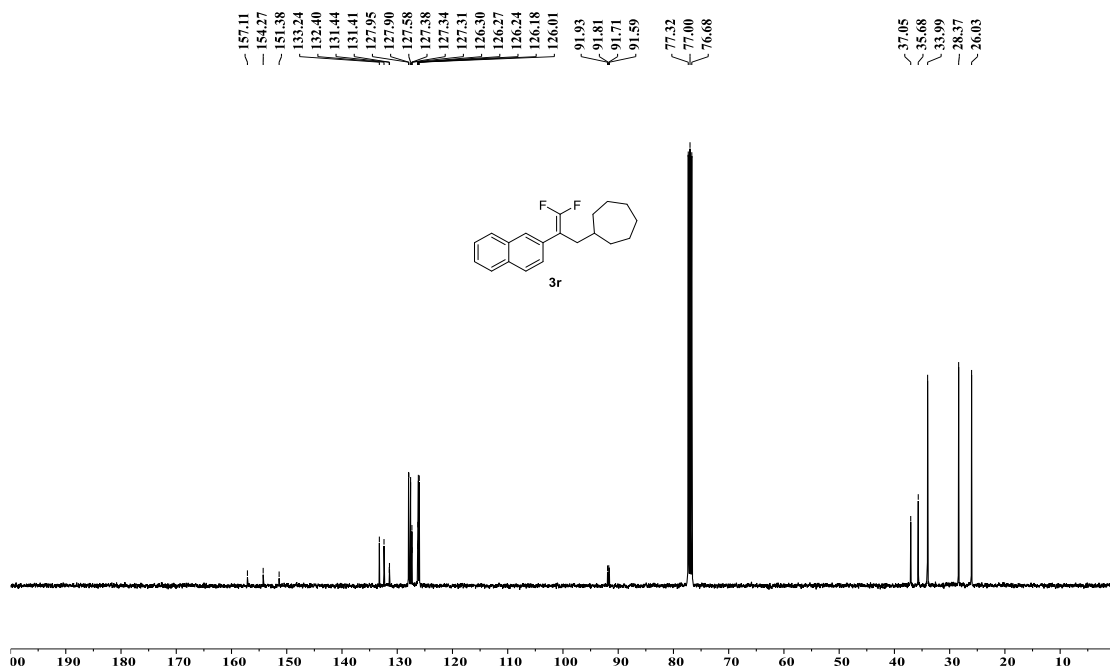

$^{19}\text{F}$  NMR (376 MHz,  $\text{CDCl}_3$ )

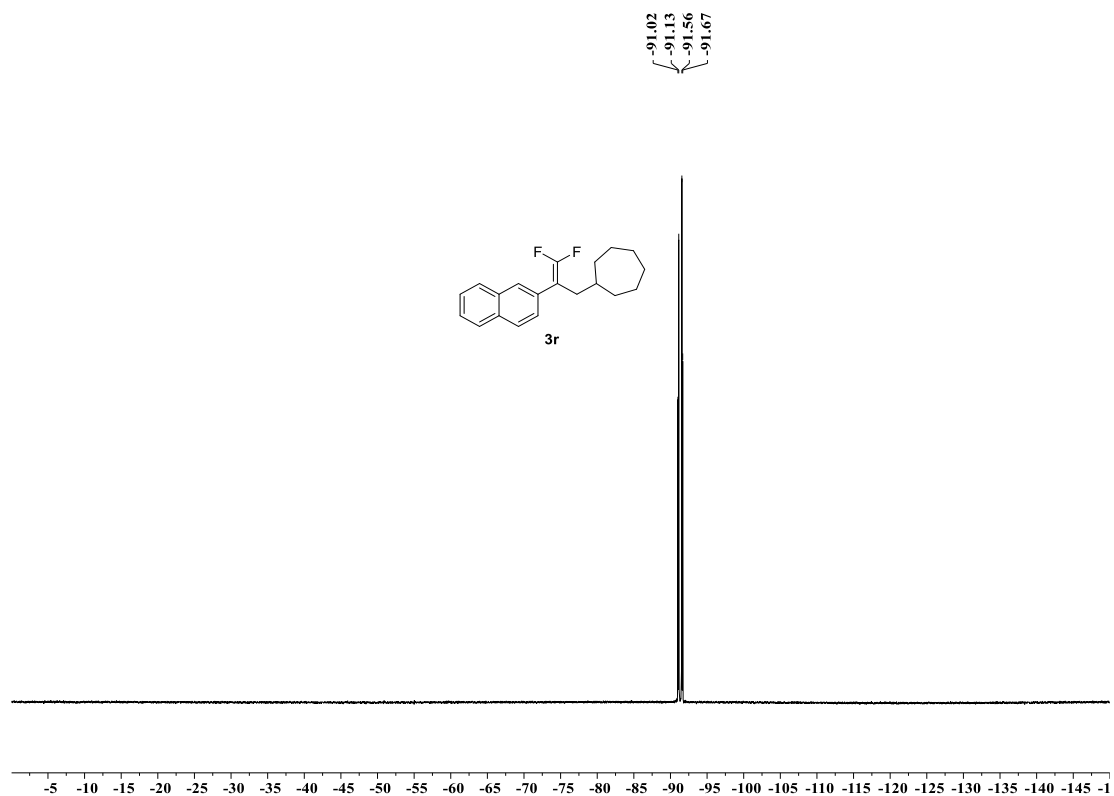

$^1\text{H}$  NMR (400 MHz,  $\text{CDCl}_3$ )

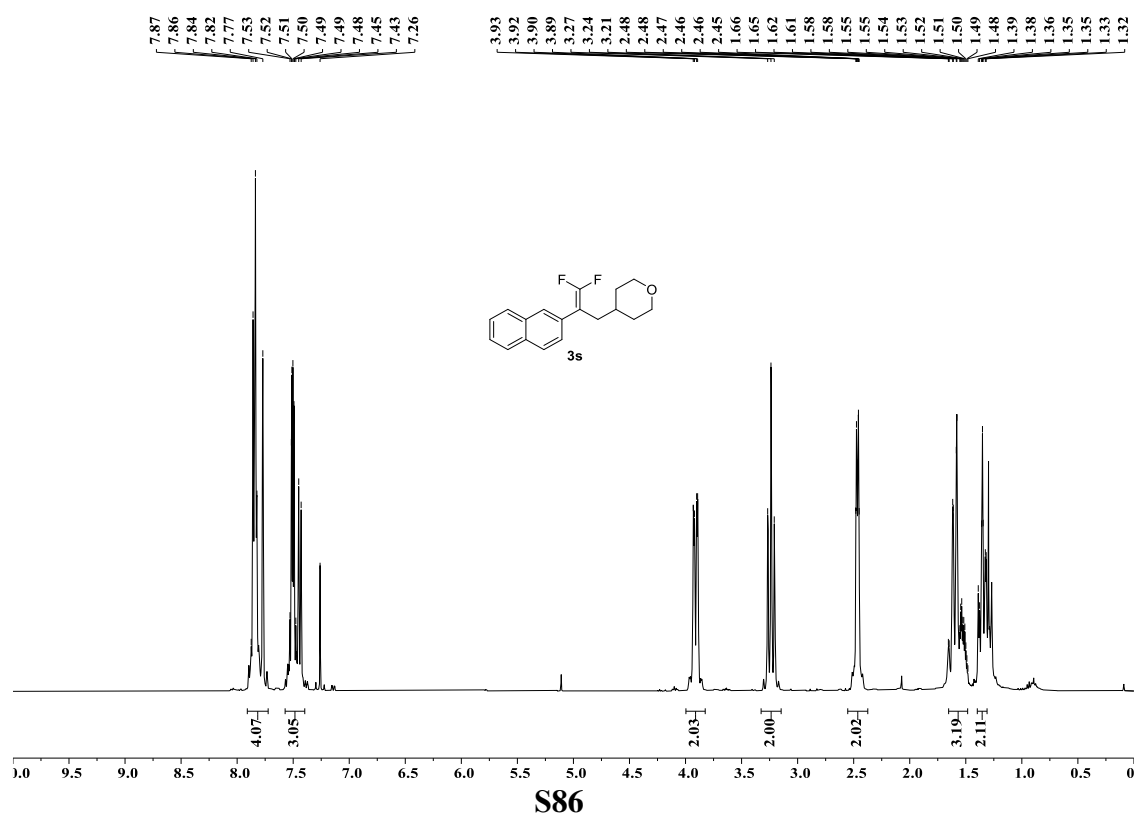

$^{13}\text{C}$  NMR (100 MHz,  $\text{CDCl}_3$ )

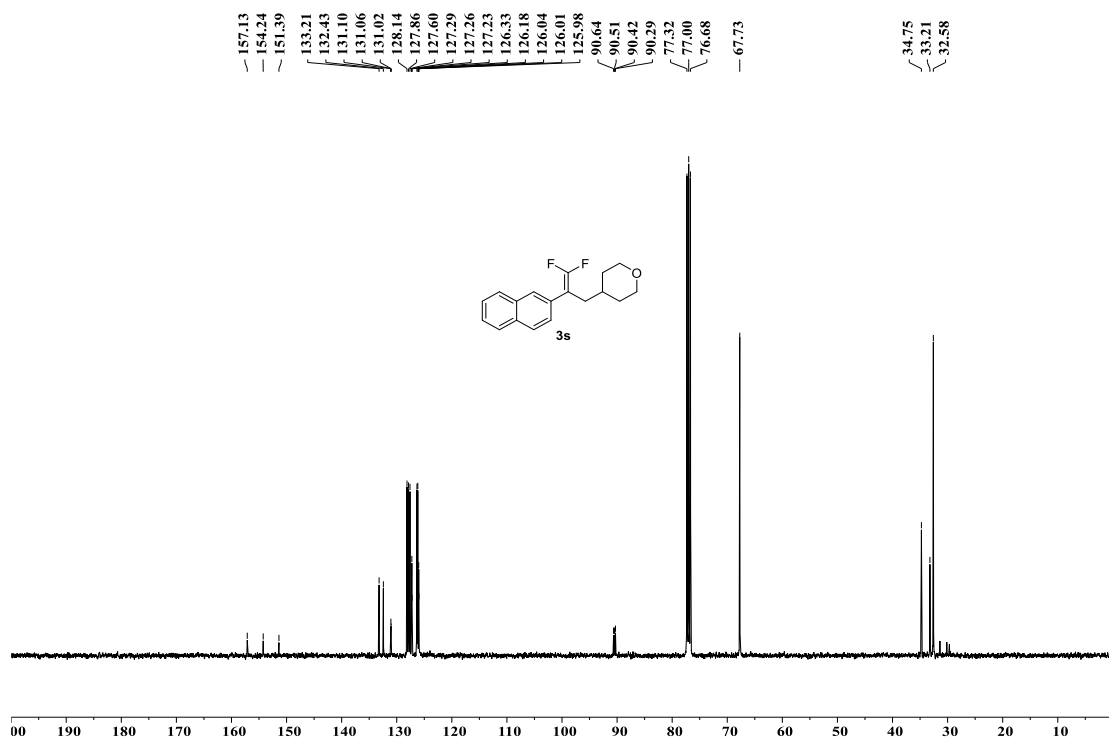

$^{19}\text{F}$  NMR (376 MHz,  $\text{CDCl}_3$ )

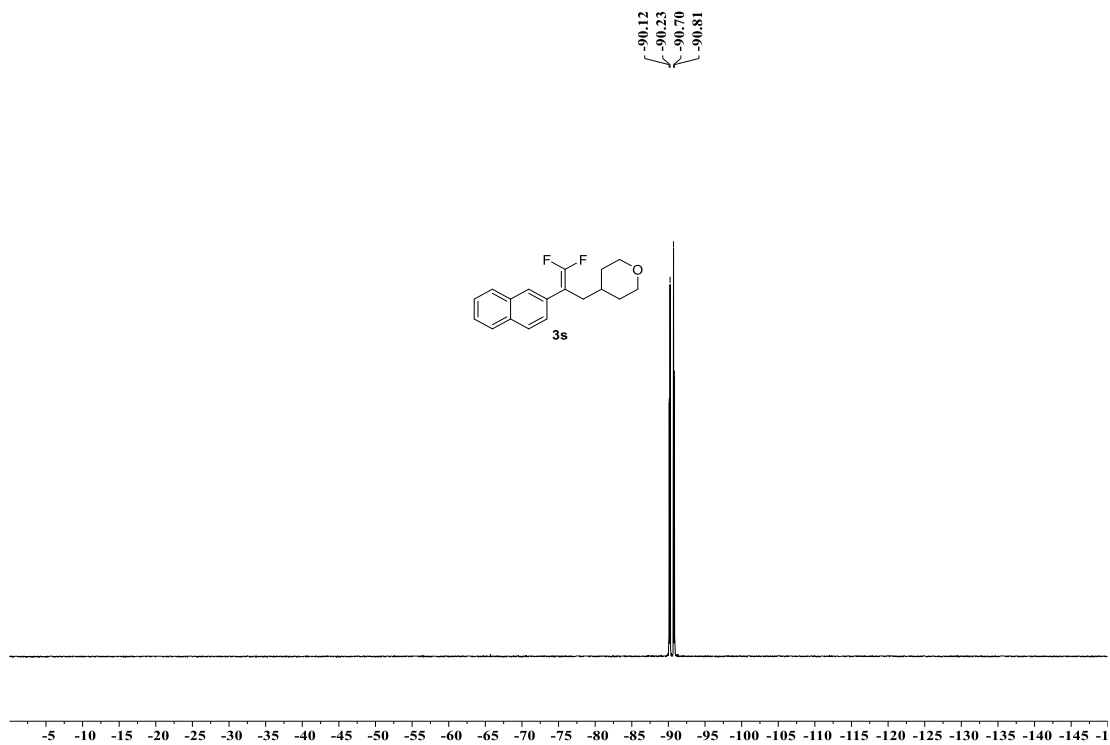

$^1\text{H}$  NMR (400 MHz,  $\text{CDCl}_3$ )

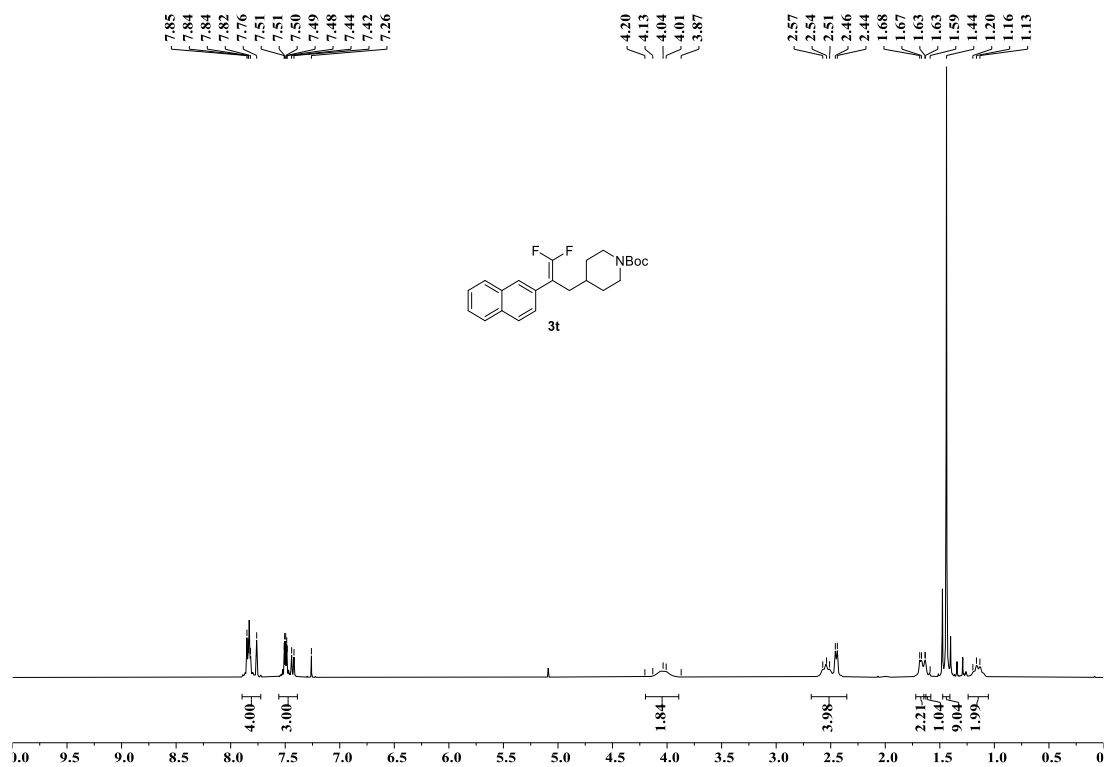

$^{13}\text{C}$  NMR (100 MHz,  $\text{CDCl}_3$ )

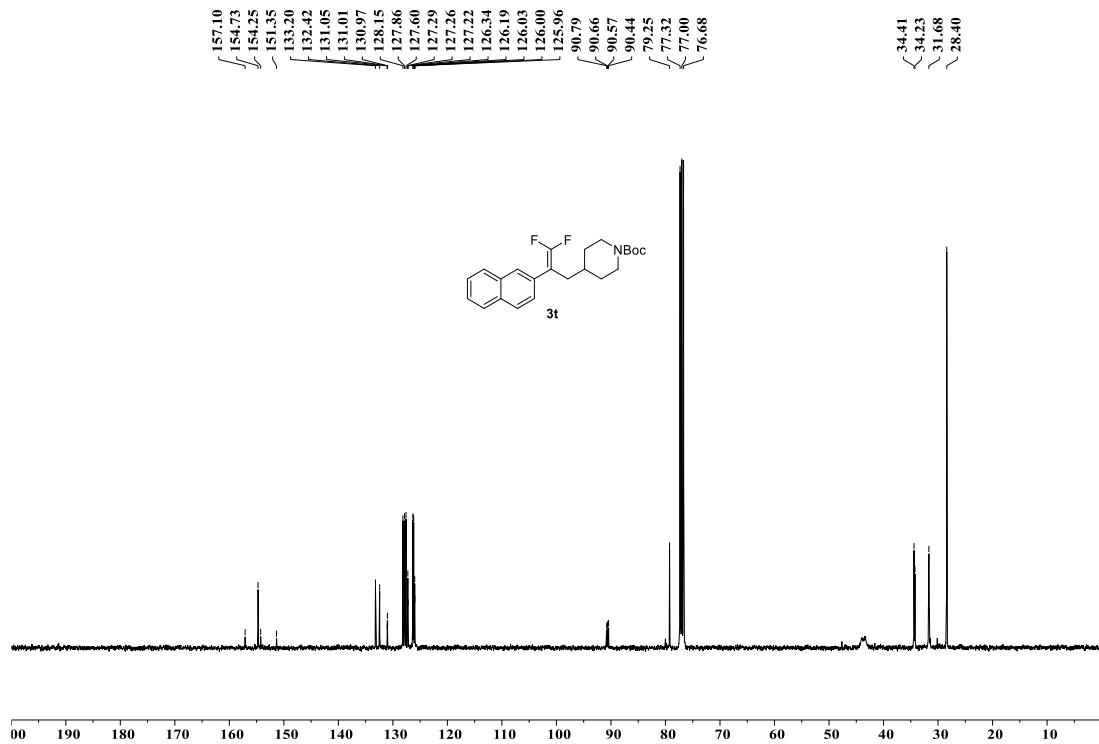

$^{19}\text{F}$  NMR (376 MHz,  $\text{CDCl}_3$ )

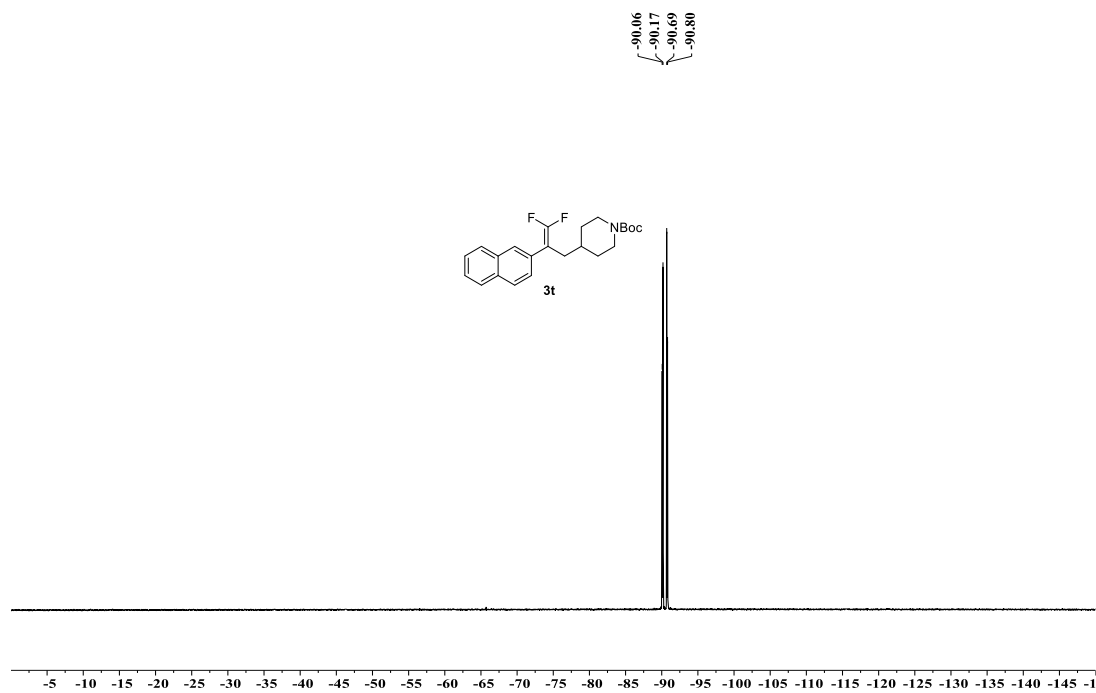

$^1\text{H}$  NMR (400 MHz,  $\text{CDCl}_3$ )

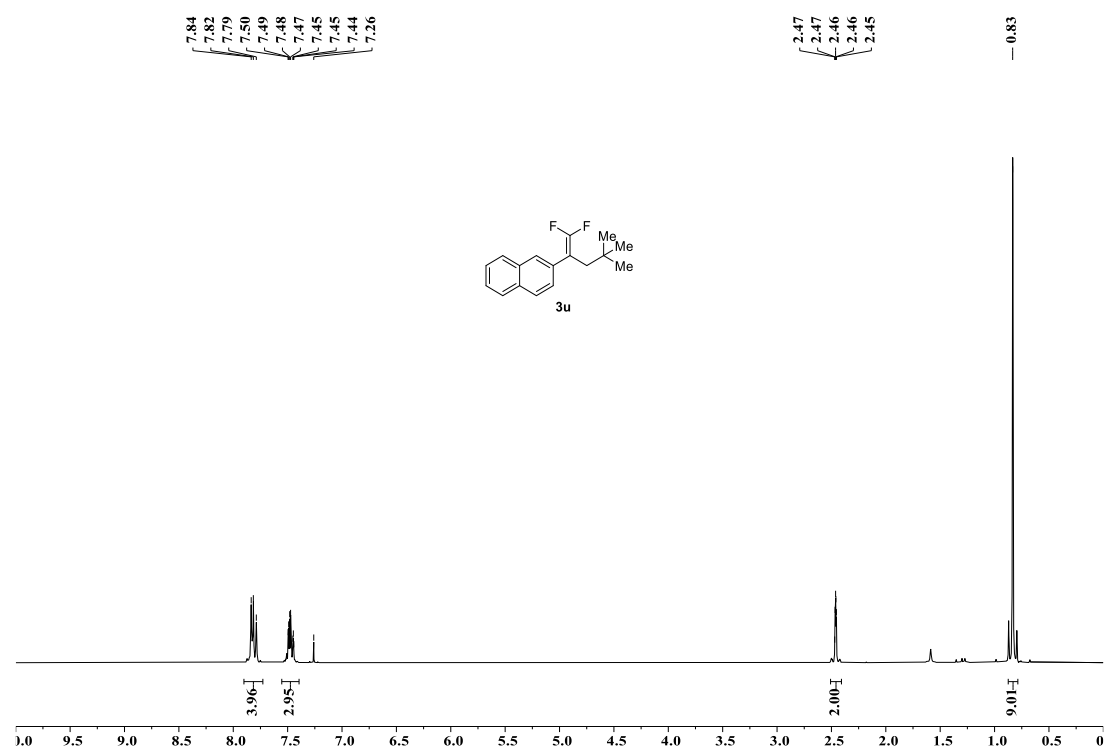

$^{13}\text{C}$  NMR (100 MHz,  $\text{CDCl}_3$ )

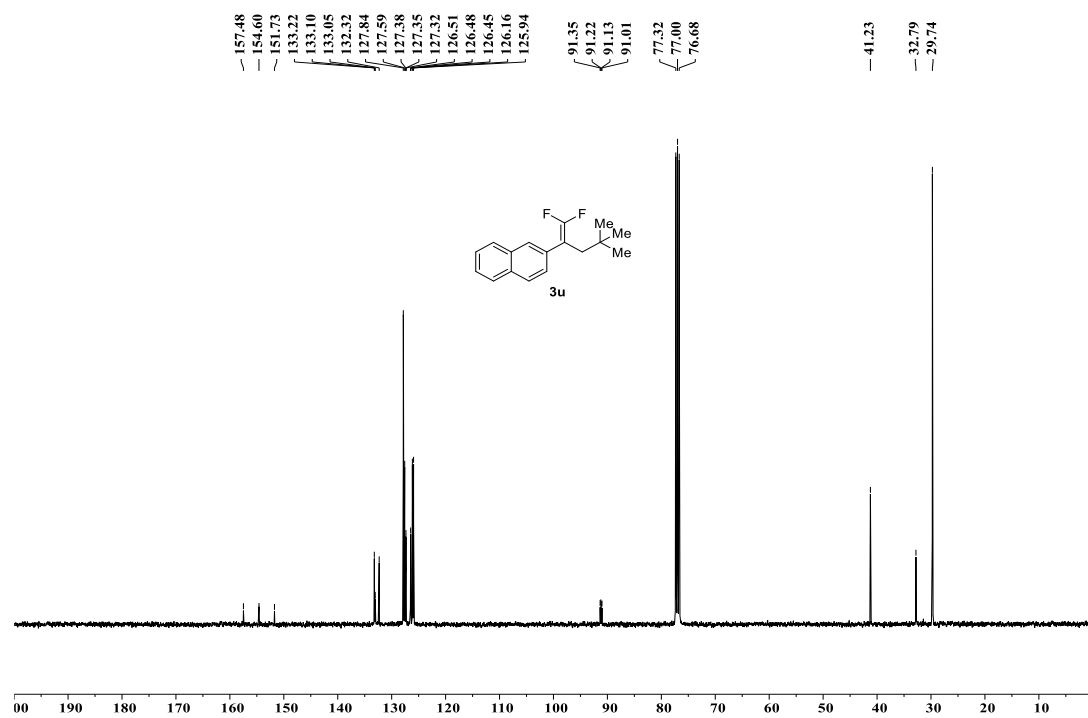

$^{19}\text{F}$  NMR (376 MHz,  $\text{CDCl}_3$ )

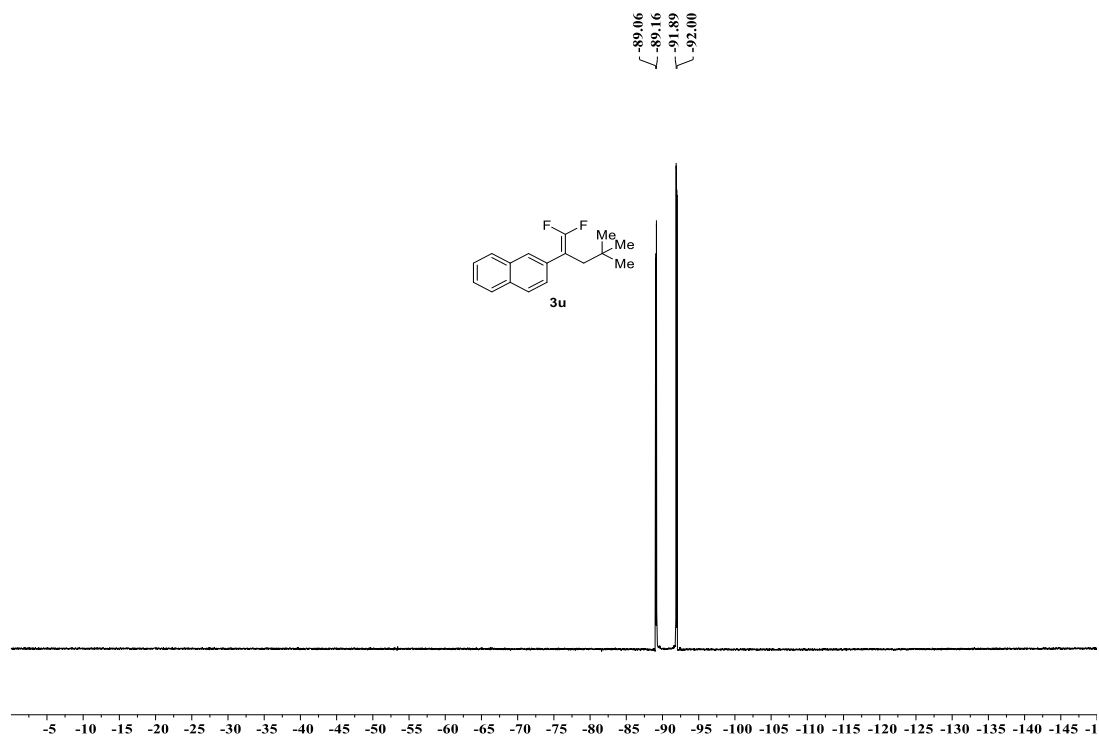

$^1\text{H}$  NMR (400 MHz,  $\text{CDCl}_3$ )

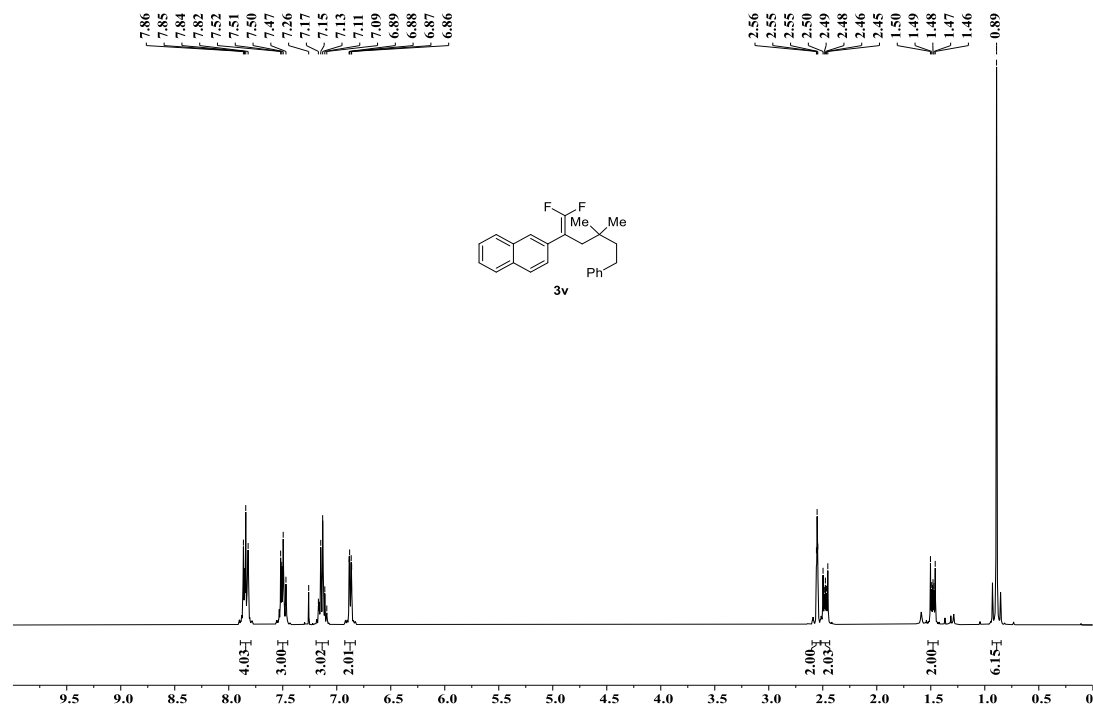

$^{13}\text{C}$  NMR (100 MHz,  $\text{CDCl}_3$ )

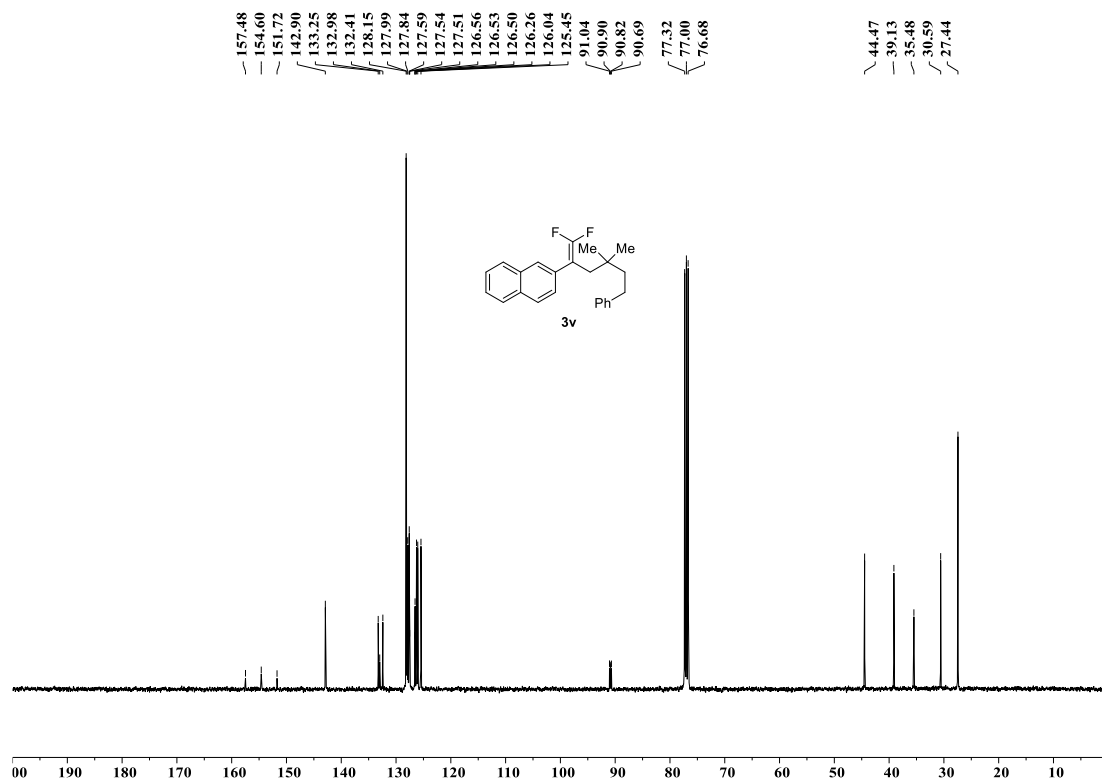

$^{19}\text{F}$  NMR (376 MHz,  $\text{CDCl}_3$ )

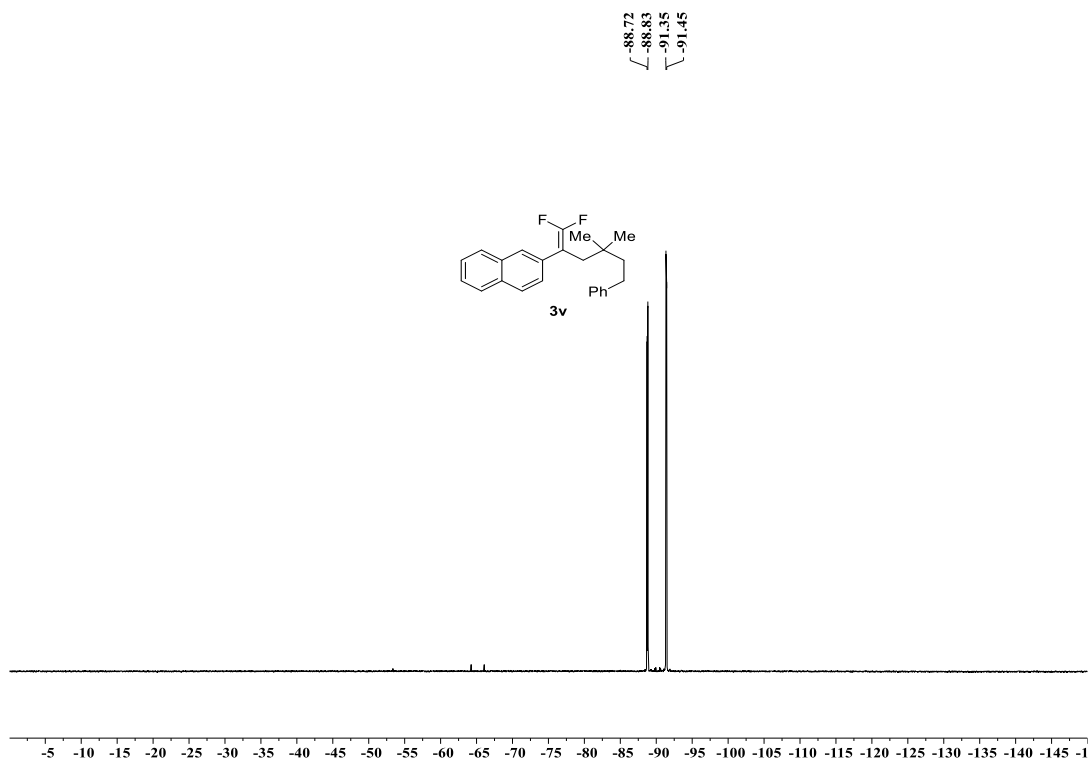

$^1\text{H}$  NMR (400 MHz,  $\text{CDCl}_3$ )

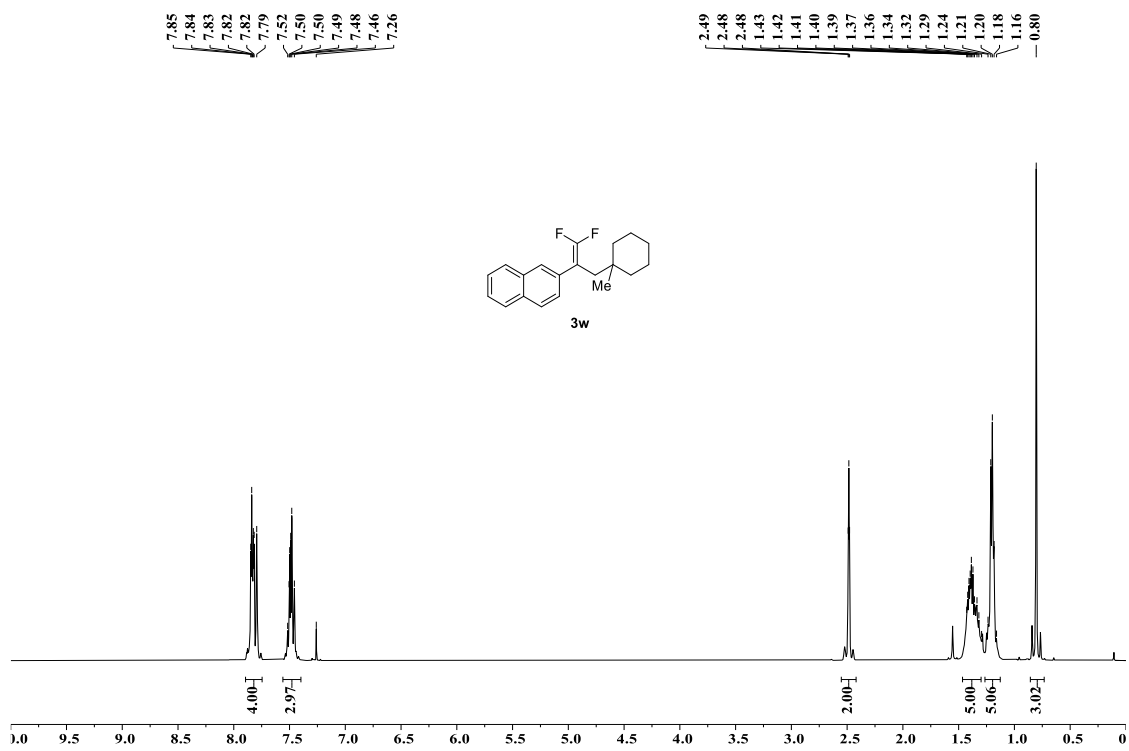



$^{13}\text{C}$  NMR (100 MHz,  $\text{CDCl}_3$ )

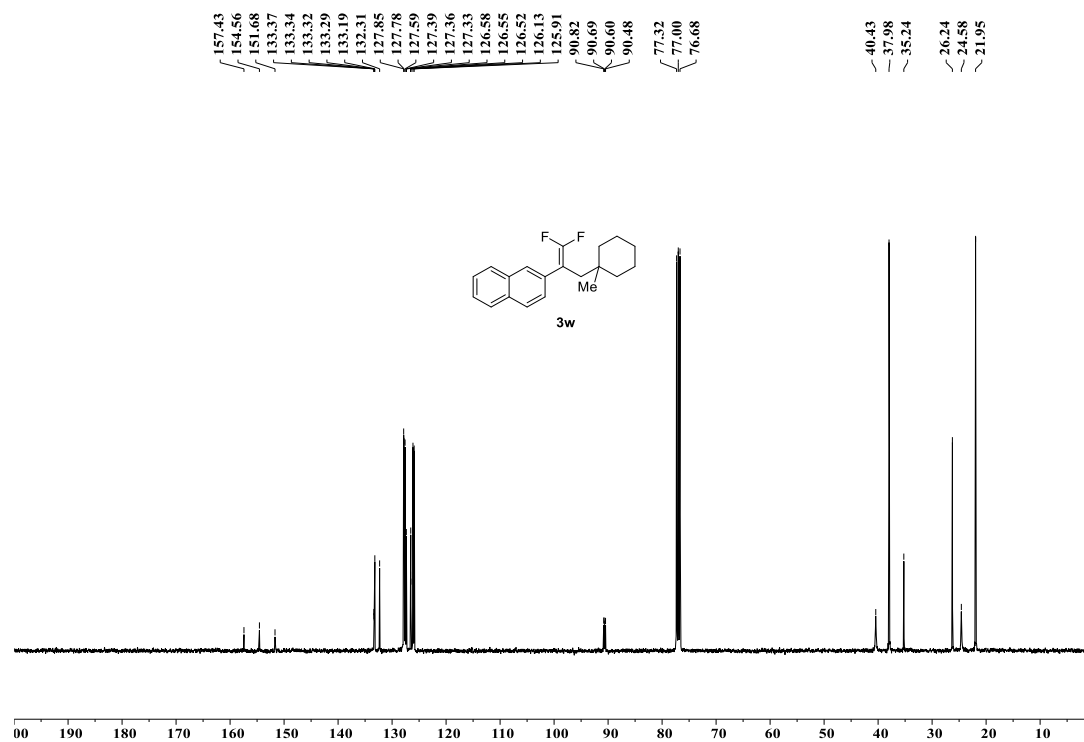

$^{19}\text{F}$  NMR (376 MHz,  $\text{CDCl}_3$ )

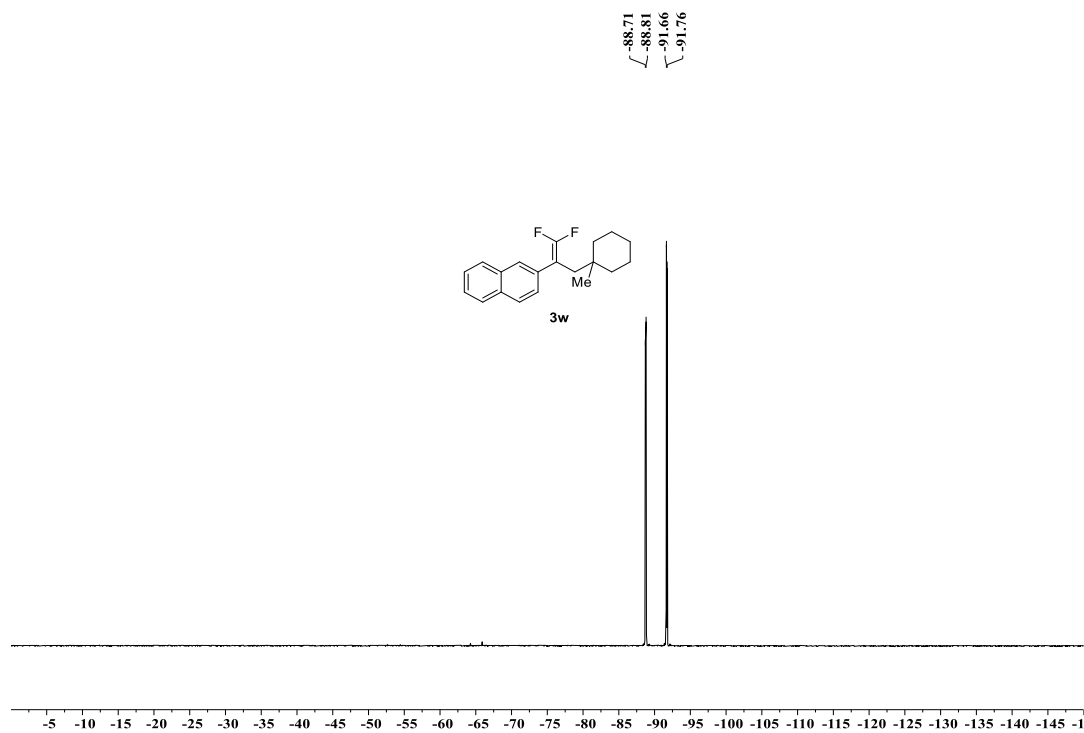

$^1\text{H}$  NMR (400 MHz,  $\text{CDCl}_3$ )

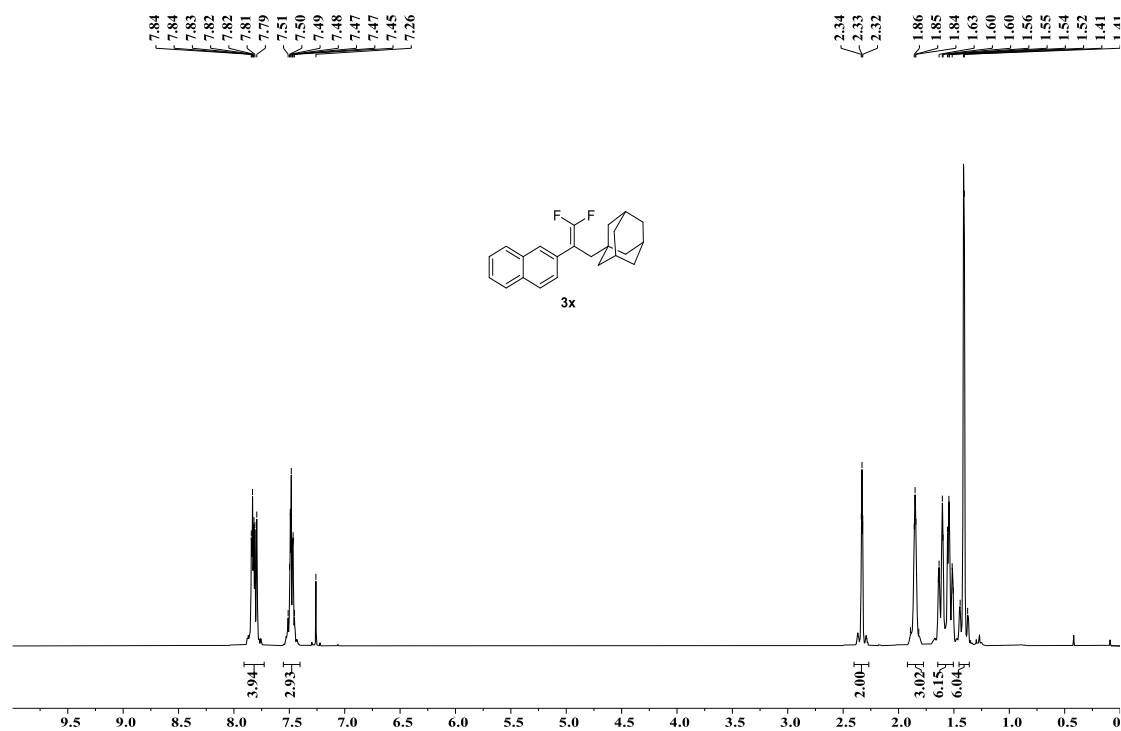

$^{13}\text{C}$  NMR (100 MHz,  $\text{CDCl}_3$ )

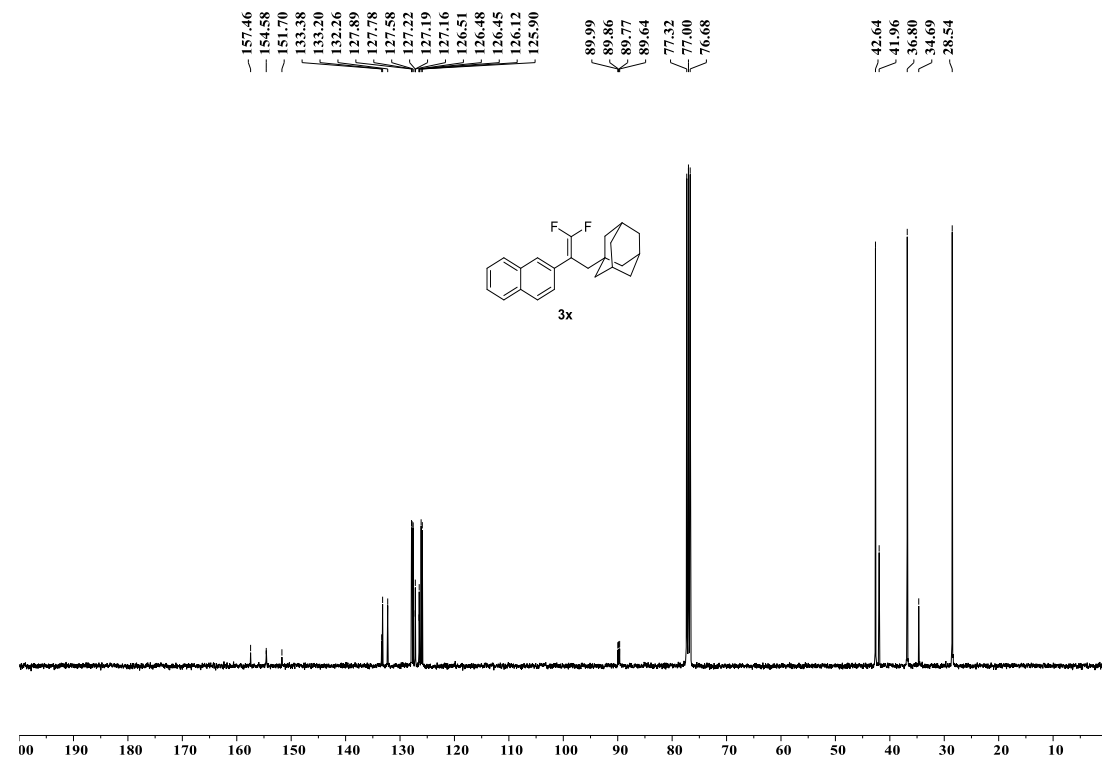

$^{19}\text{F}$  NMR (376 MHz,  $\text{CDCl}_3$ )

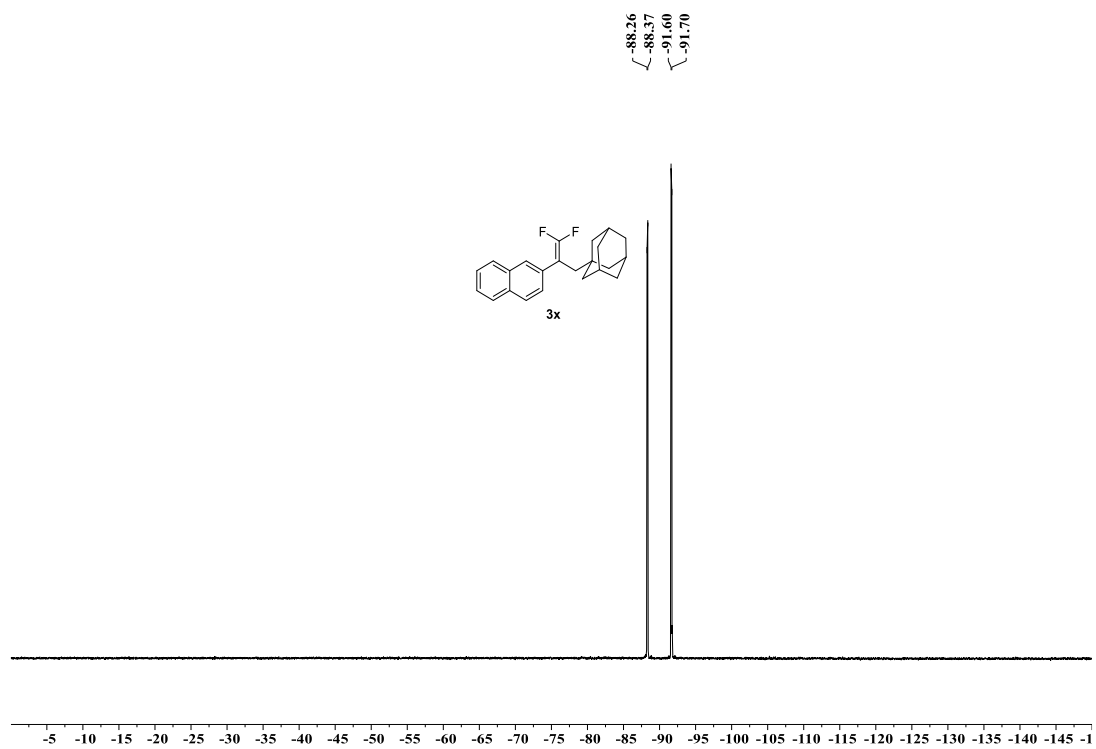

$^1\text{H}$  NMR (400 MHz,  $\text{CDCl}_3$ )

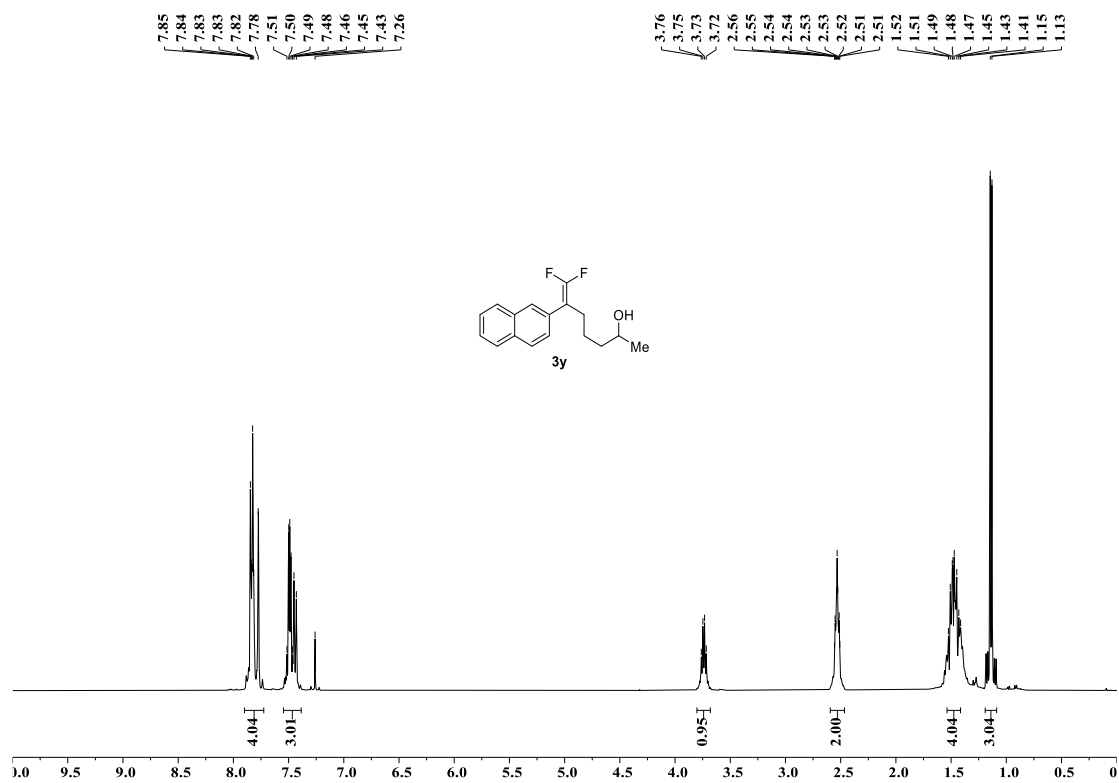

$^{13}\text{C}$  NMR (100 MHz,  $\text{CDCl}_3$ )

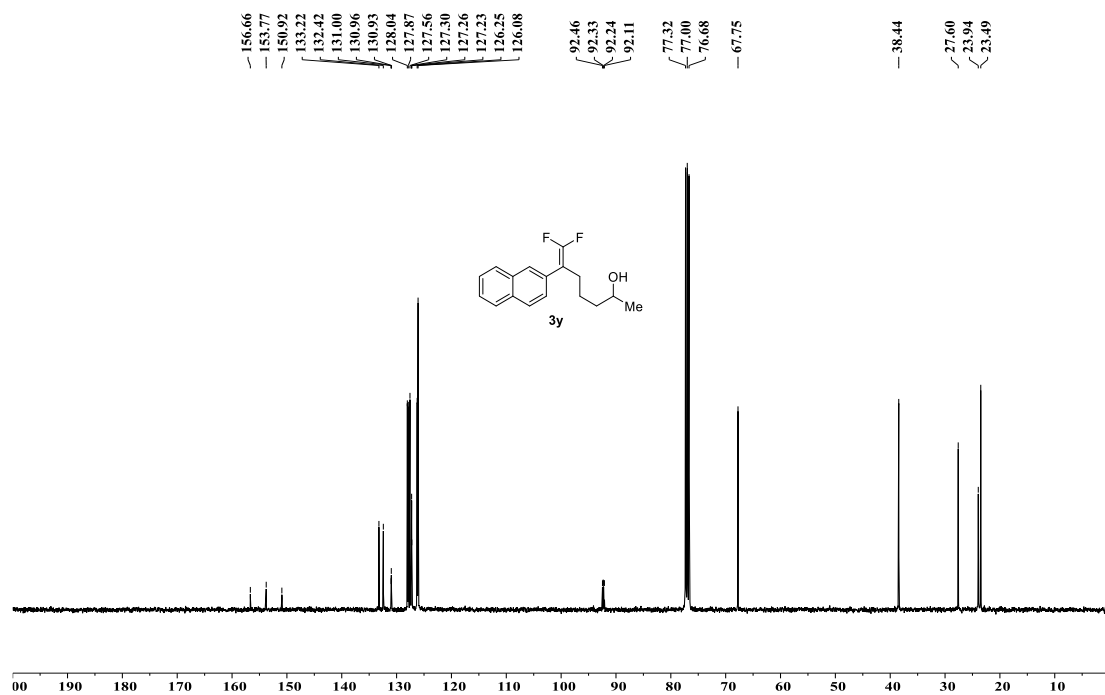

$^{19}\text{F}$  NMR (376 MHz,  $\text{CDCl}_3$ )

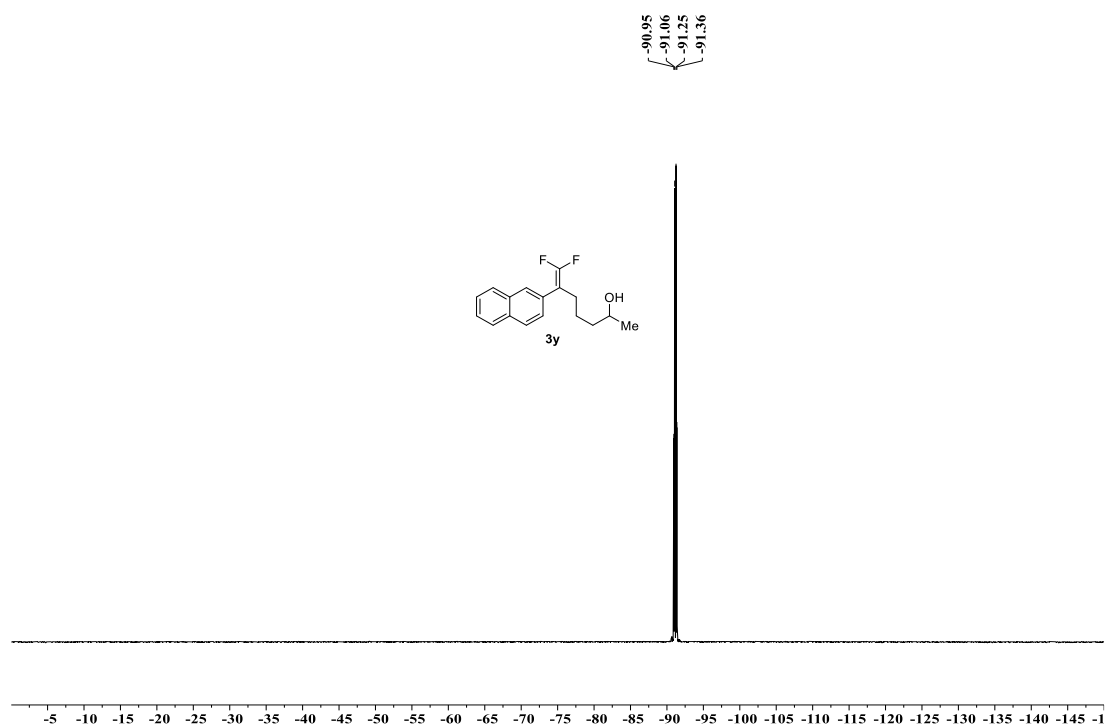

$^1\text{H}$  NMR (400 MHz,  $\text{CDCl}_3$ )

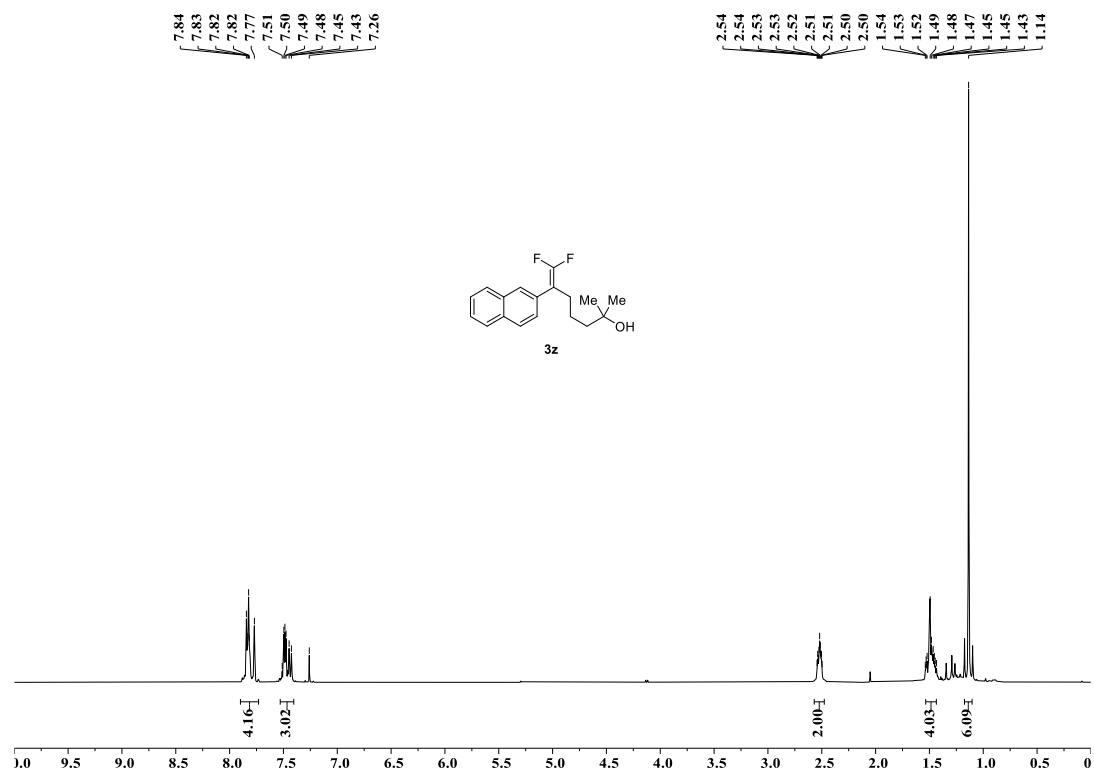

$^{13}\text{C}$  NMR (100 MHz,  $\text{CDCl}_3$ )

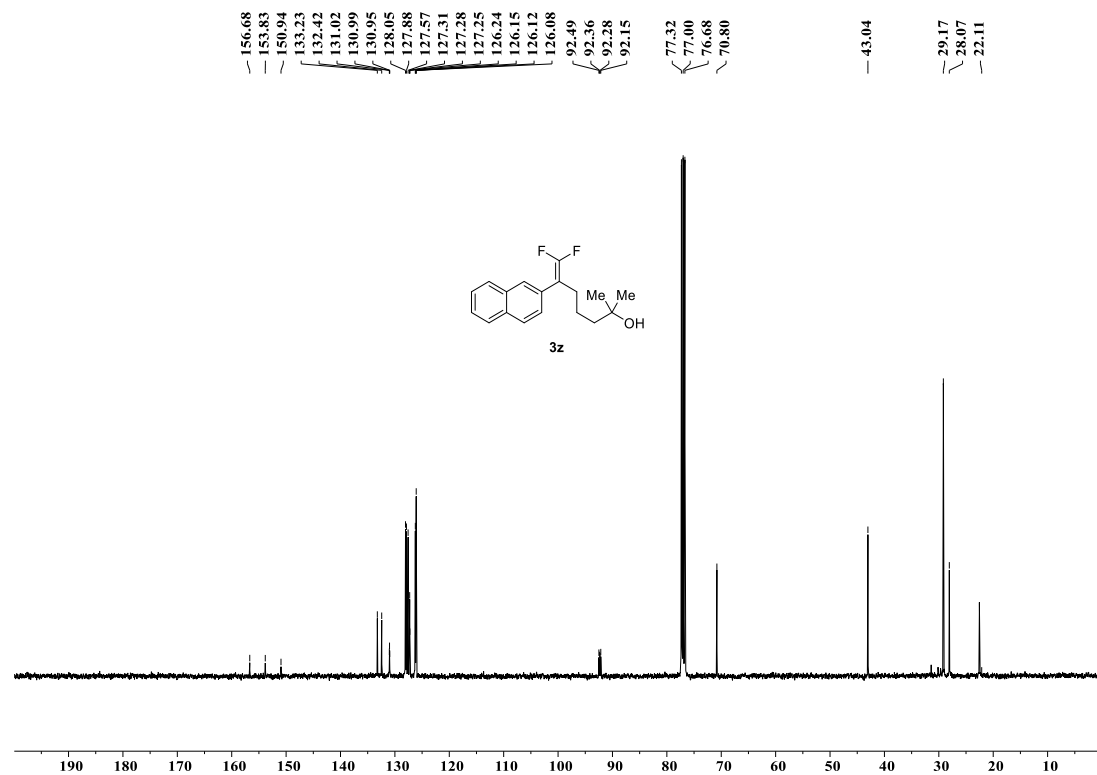

$^{19}\text{F}$  NMR (376 MHz,  $\text{CDCl}_3$ )

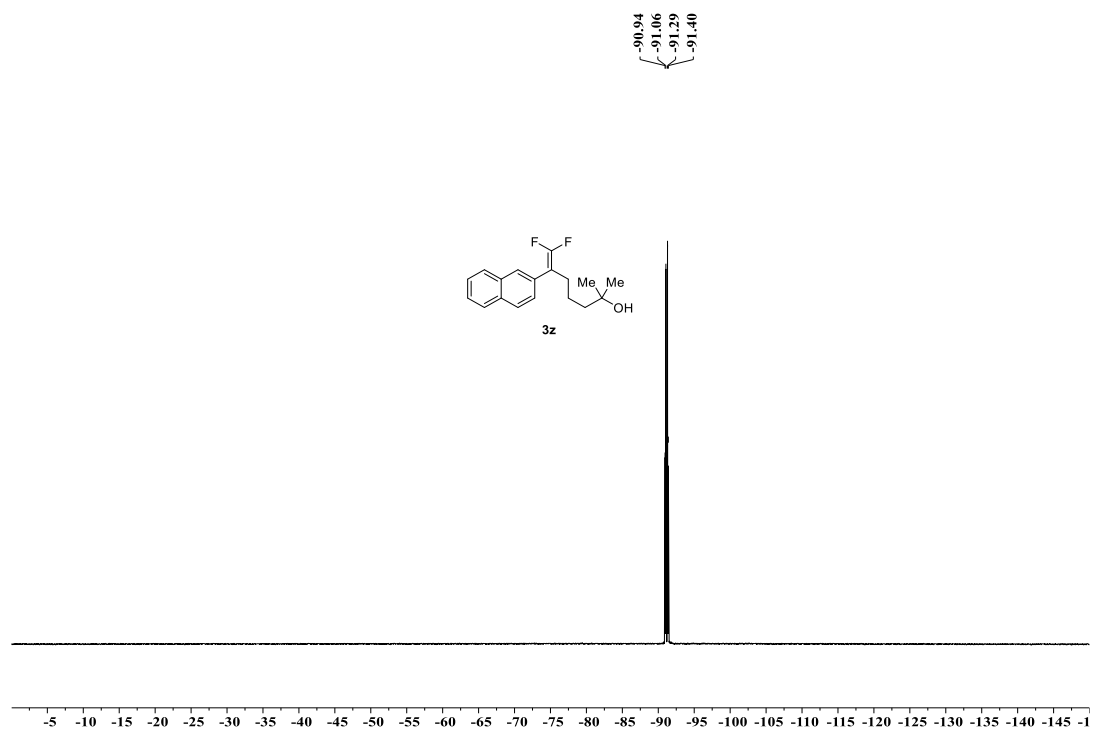

$^1\text{H}$  NMR (400 MHz,  $\text{CDCl}_3$ )

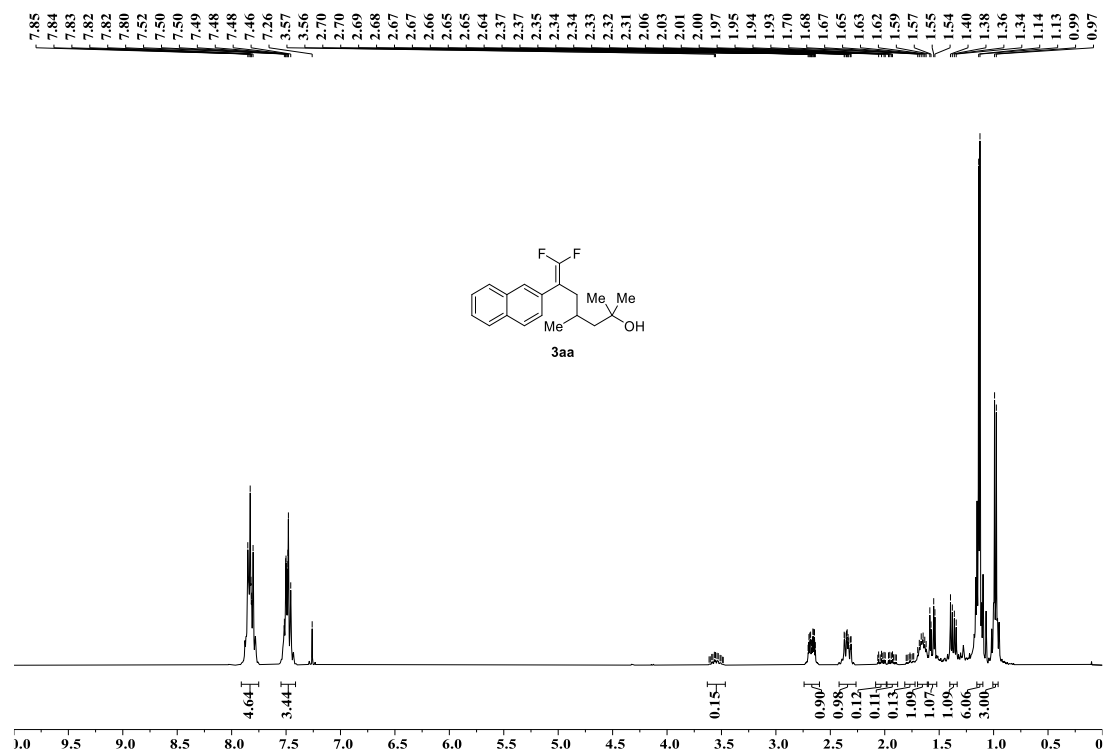

$^{13}\text{C}$  NMR (100 MHz,  $\text{CDCl}_3$ )

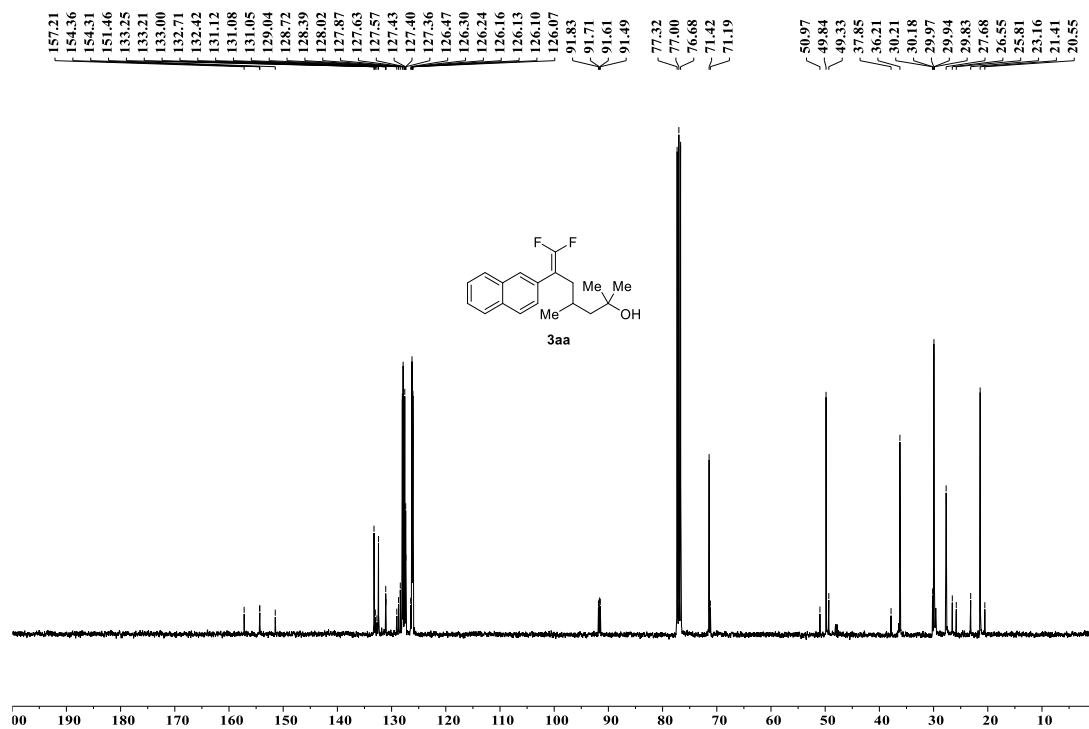

$^{19}\text{F}$  NMR (376 MHz,  $\text{CDCl}_3$ )

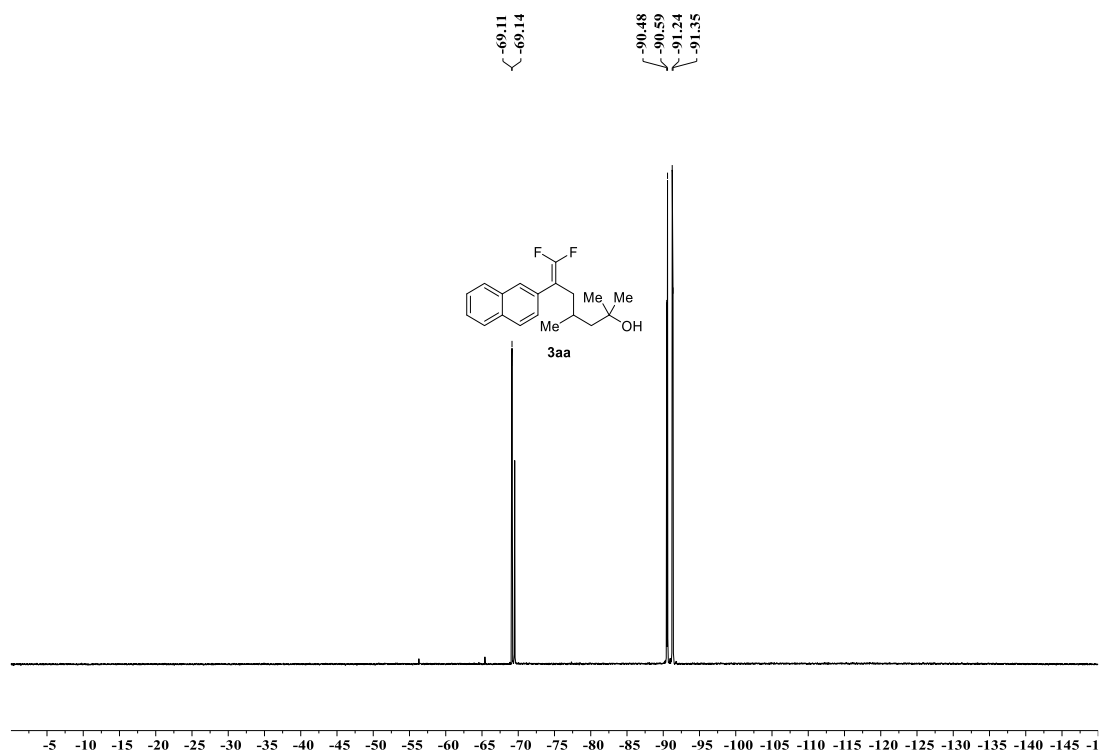

$^1\text{H}$  NMR (400 MHz,  $\text{CDCl}_3$ )

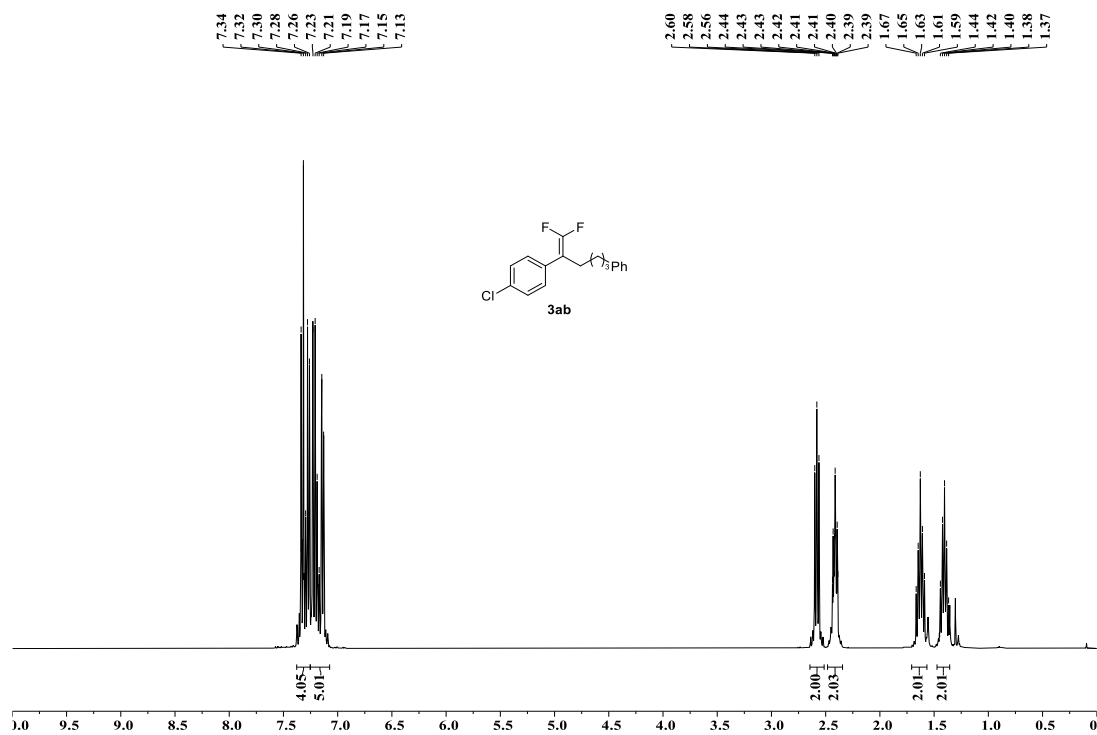

$^{13}\text{C}$  NMR (100 MHz,  $\text{CDCl}_3$ )

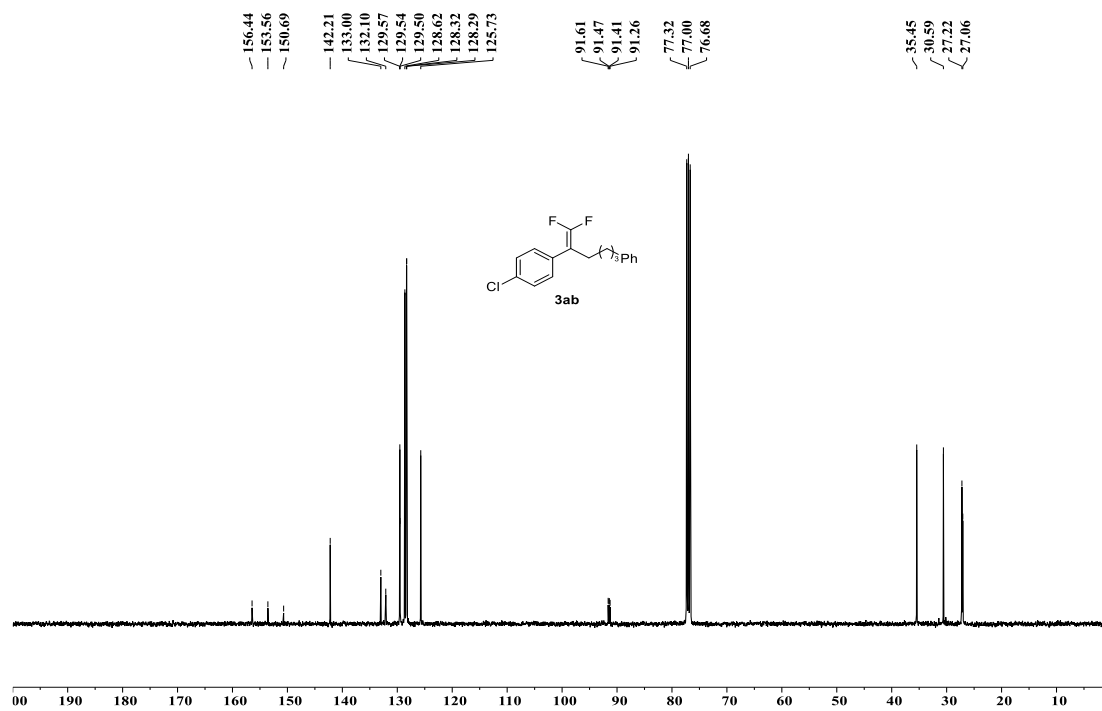



$^{19}\text{F}$  NMR (376 MHz,  $\text{CDCl}_3$ )

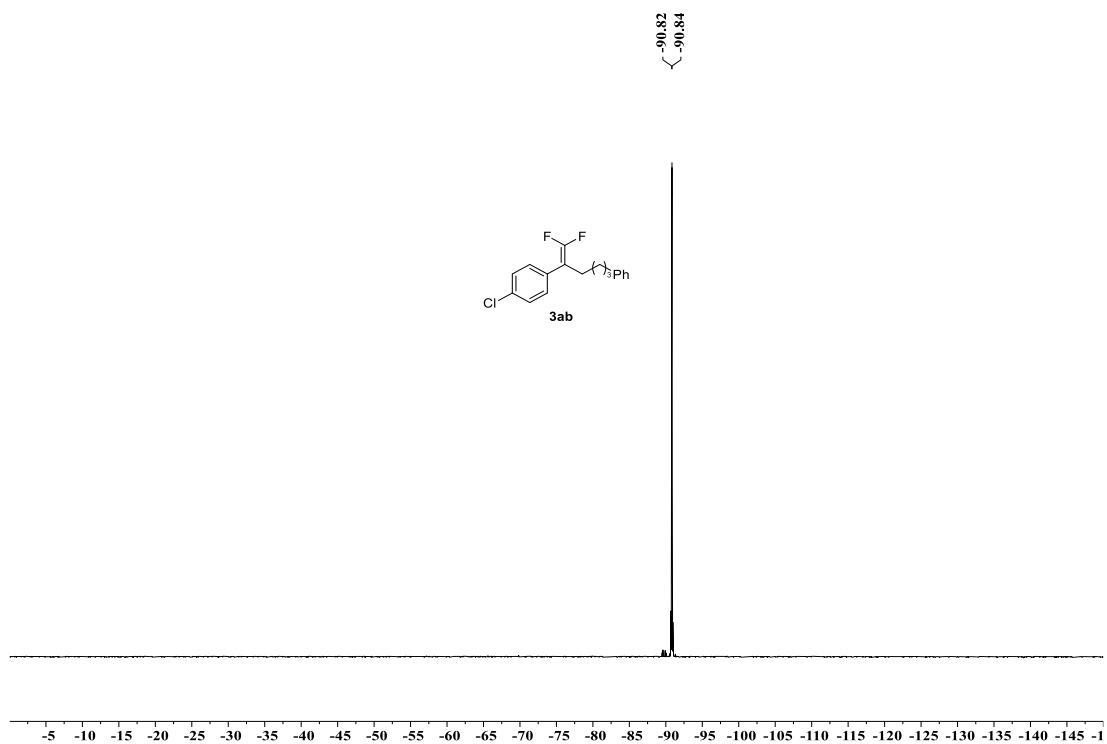

$^1\text{H}$  NMR (400 MHz,  $\text{CDCl}_3$ )

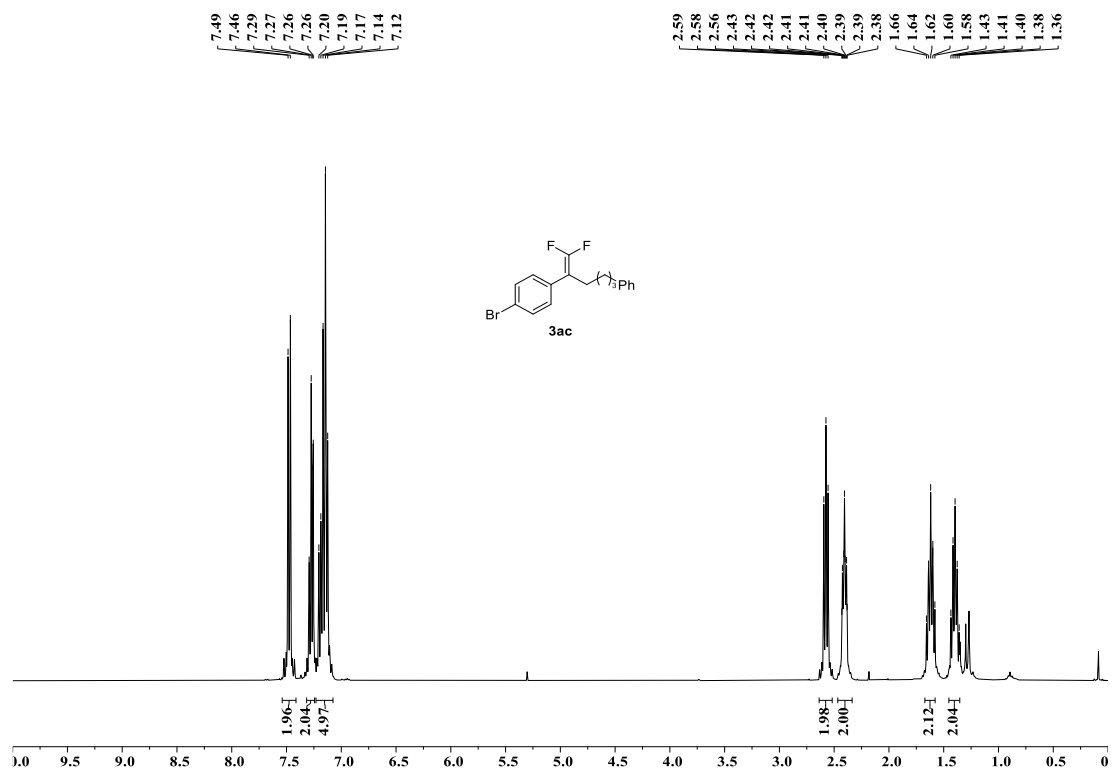

$^{13}\text{C}$  NMR (100 MHz,  $\text{CDCl}_3$ )

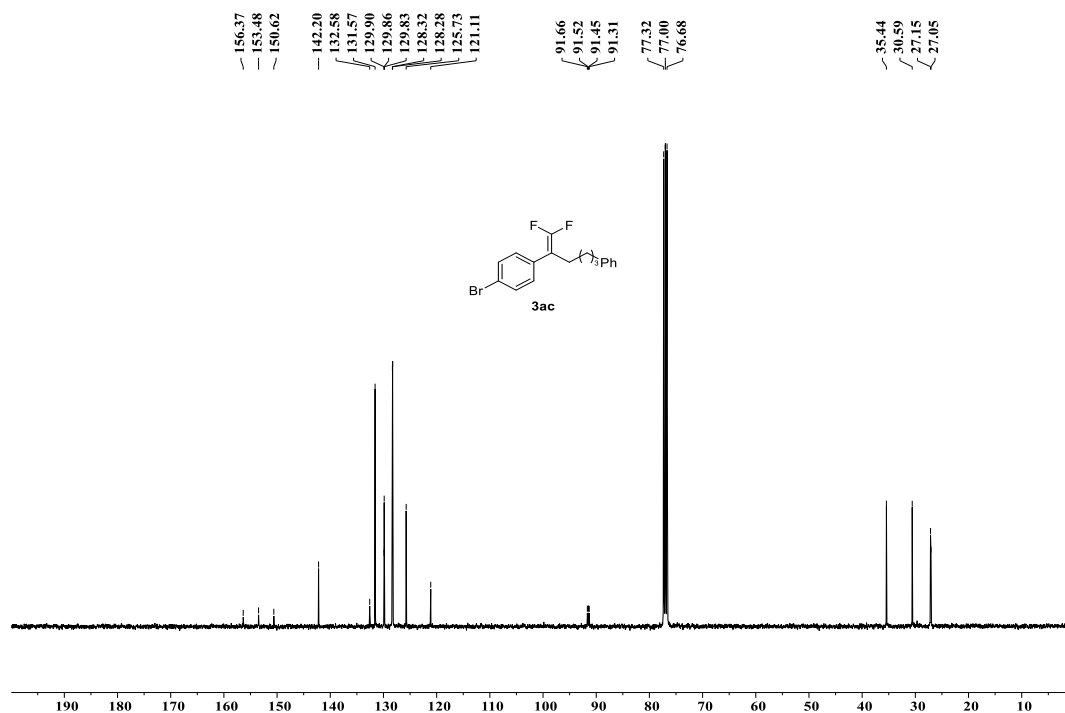

$^{19}\text{F}$  NMR (376 MHz,  $\text{CDCl}_3$ )

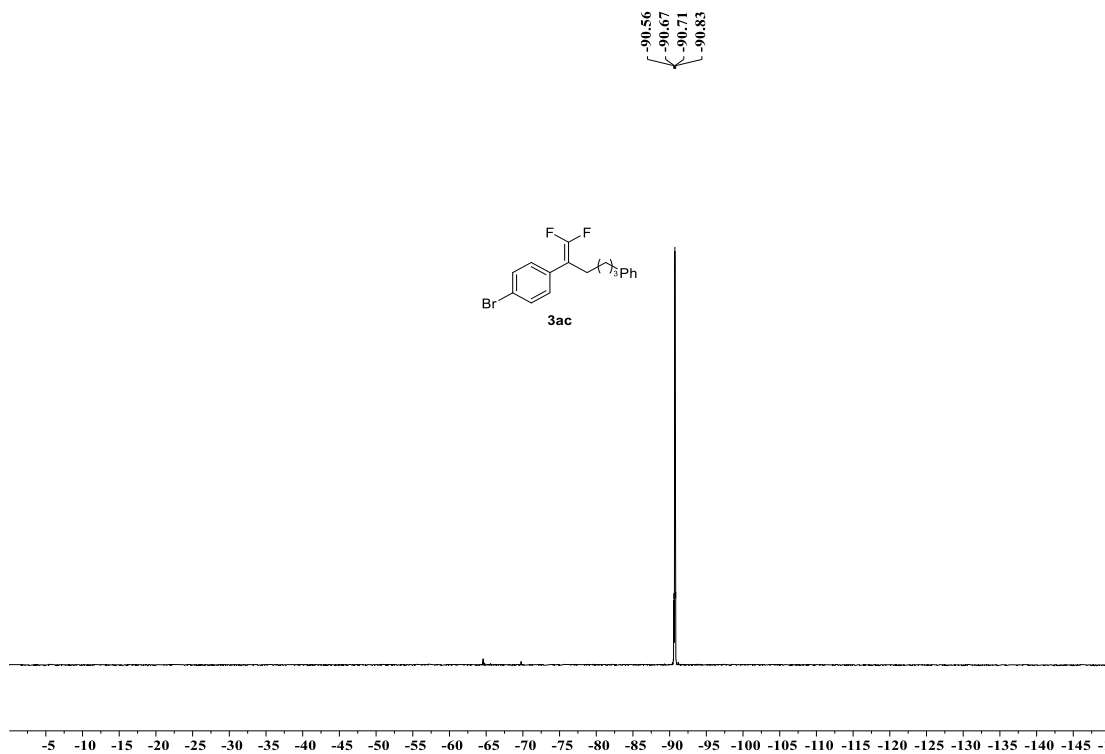

$^1\text{H}$  NMR (400 MHz,  $\text{CDCl}_3$ )

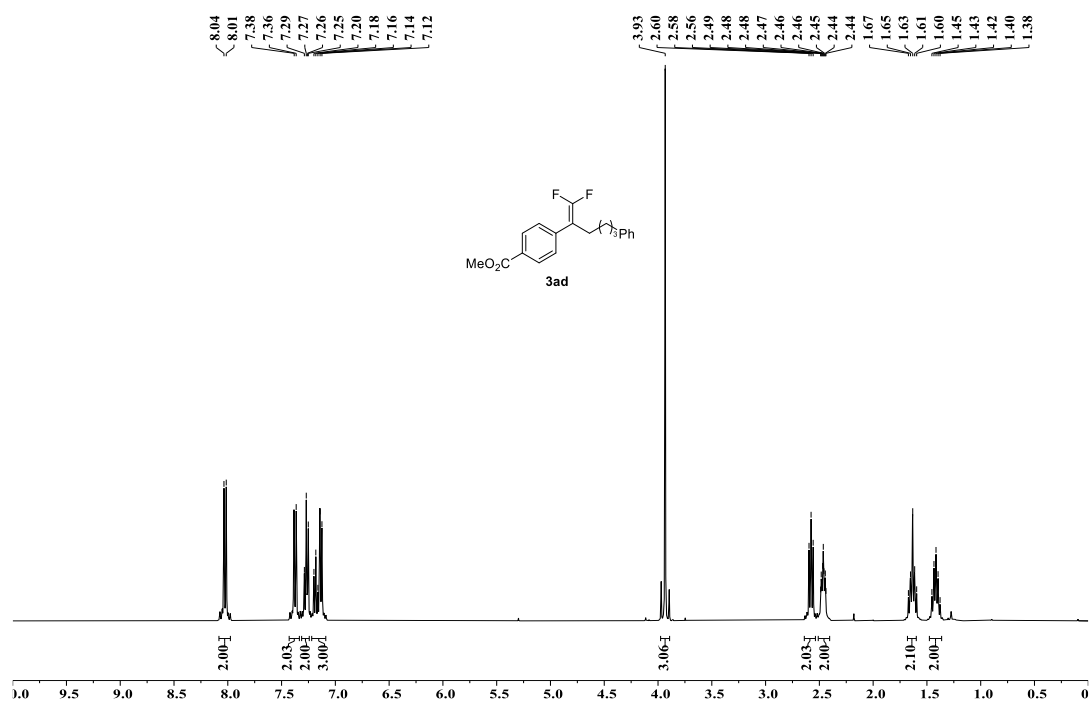

$^{13}\text{C}$  NMR (100 MHz,  $\text{CDCl}_3$ )

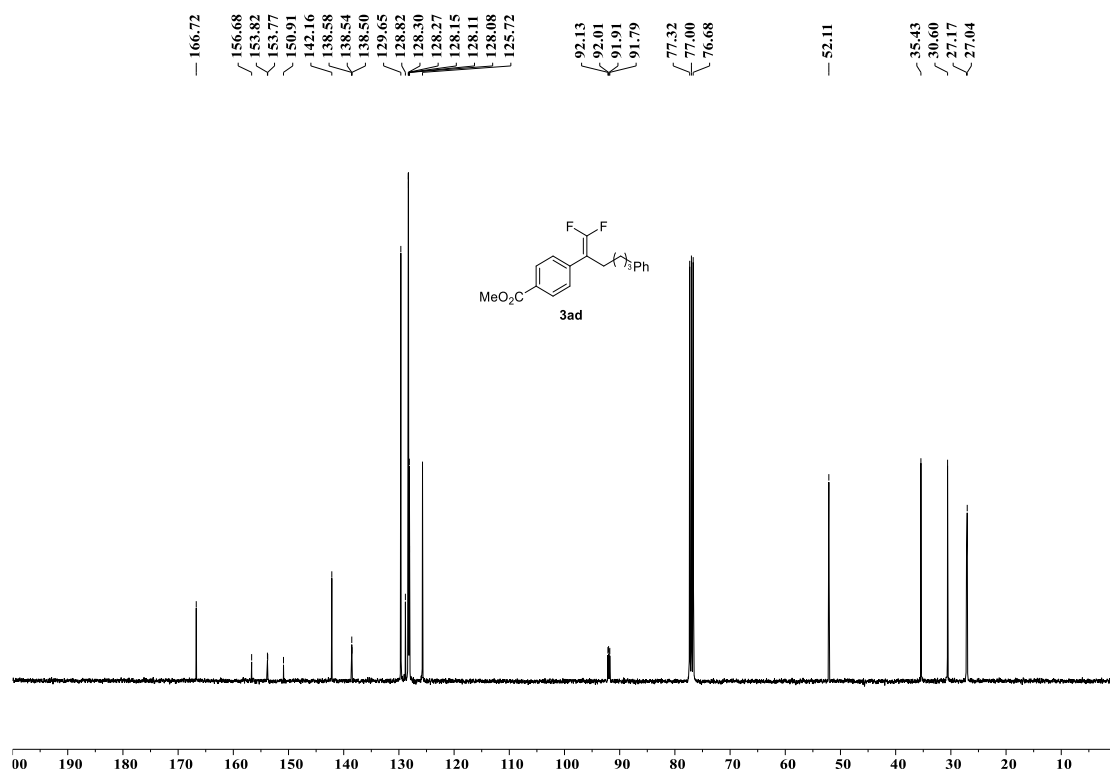

$^{19}\text{F}$  NMR (376 MHz,  $\text{CDCl}_3$ )

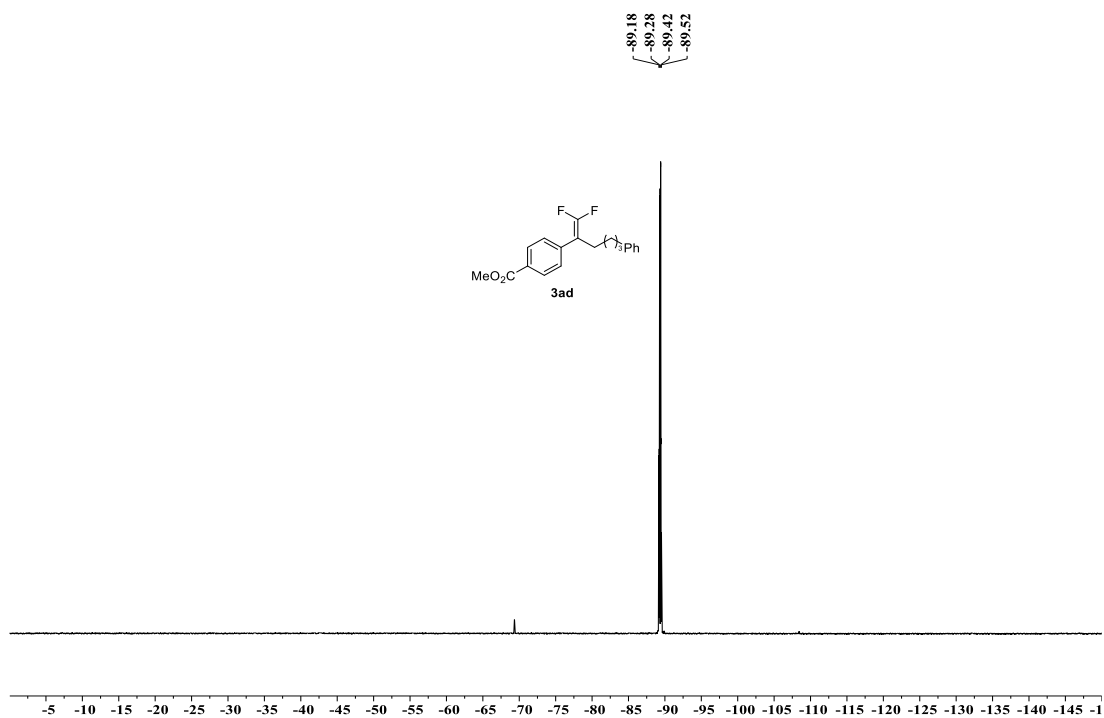

$^1\text{H}$  NMR (400 MHz,  $\text{CDCl}_3$ )

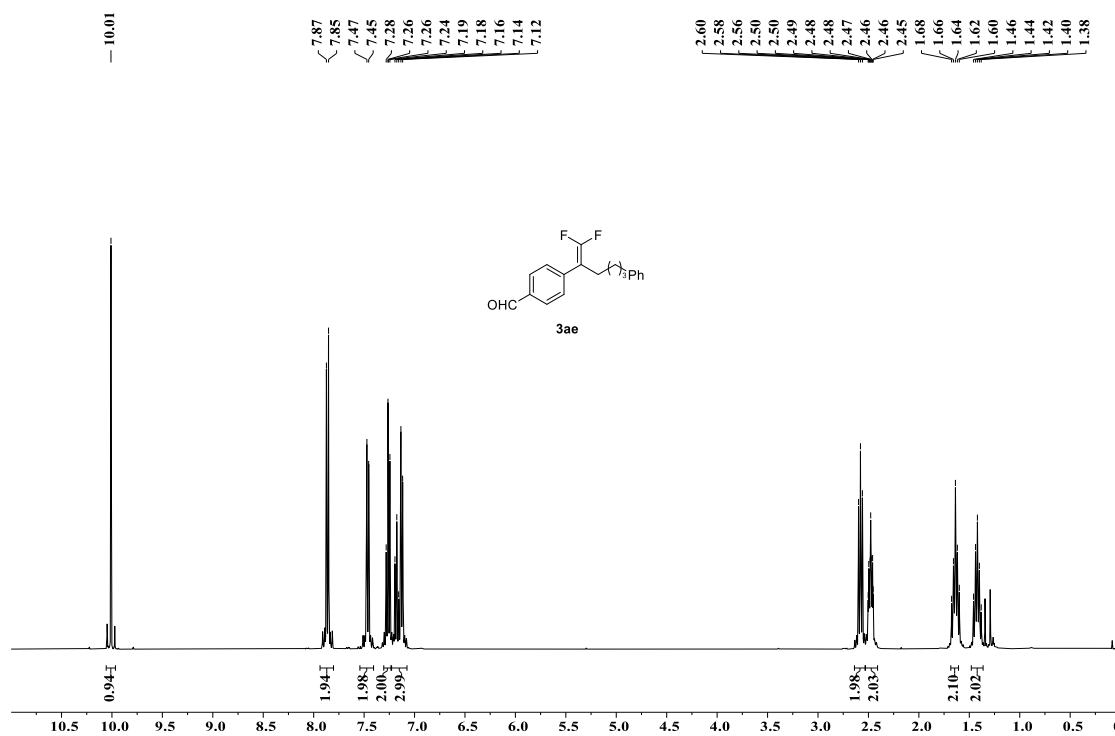

<sup>13</sup>C NMR (100 MHz, CDCl<sub>3</sub>)

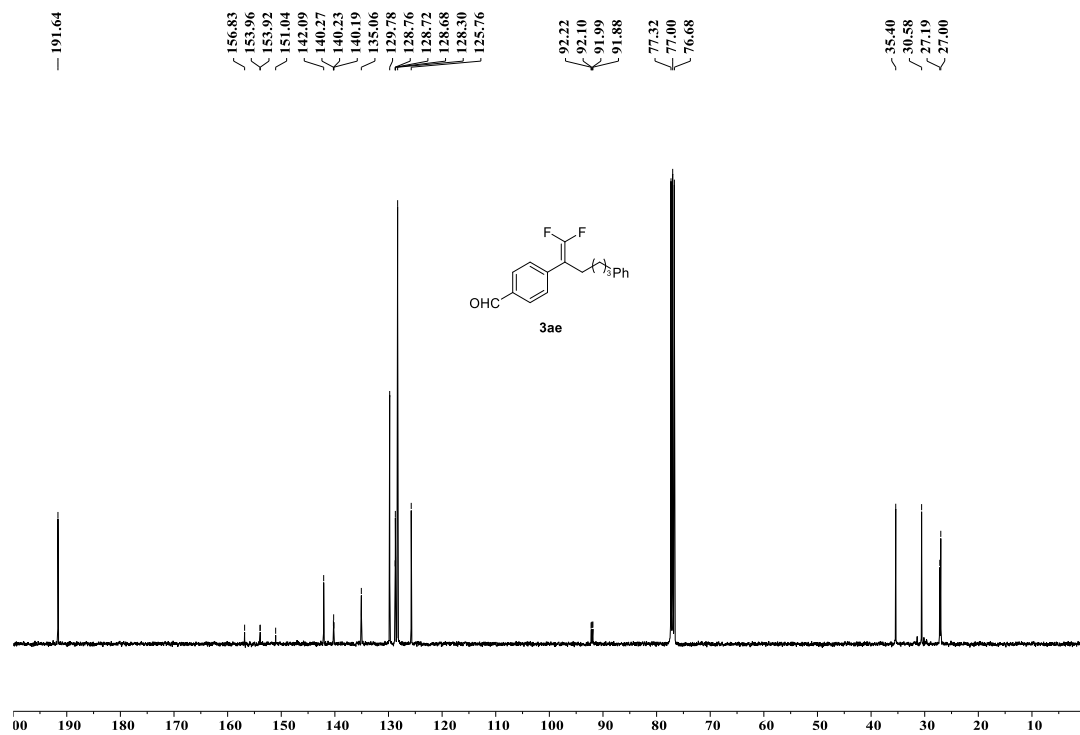

<sup>19</sup>F NMR (376 MHz, CDCl<sub>3</sub>)

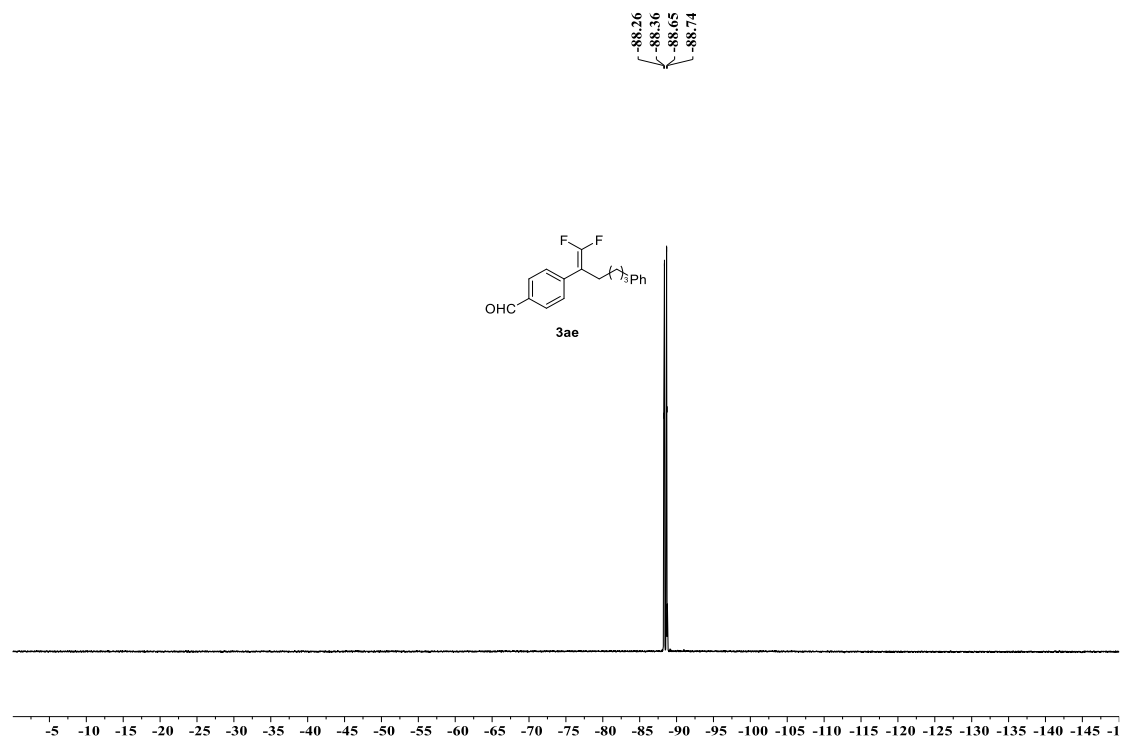

$^1\text{H}$  NMR (400 MHz,  $\text{CDCl}_3$ )

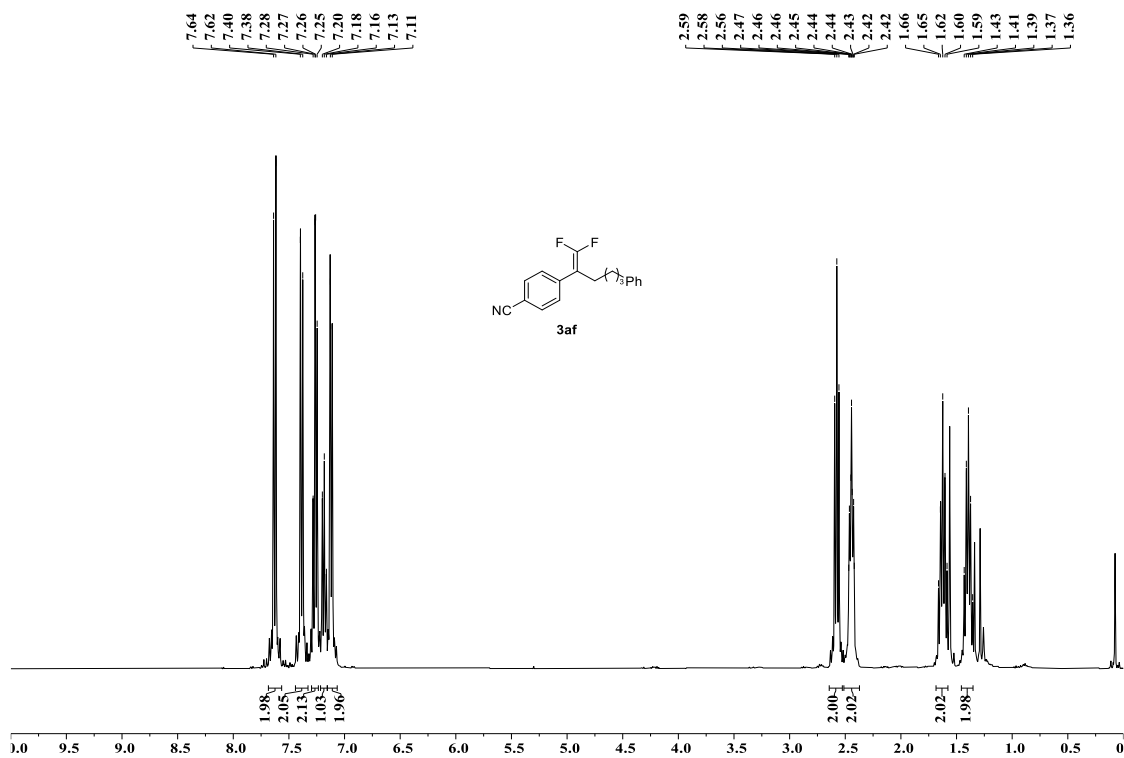

$^{13}\text{C}$  NMR (100 MHz,  $\text{CDCl}_3$ )

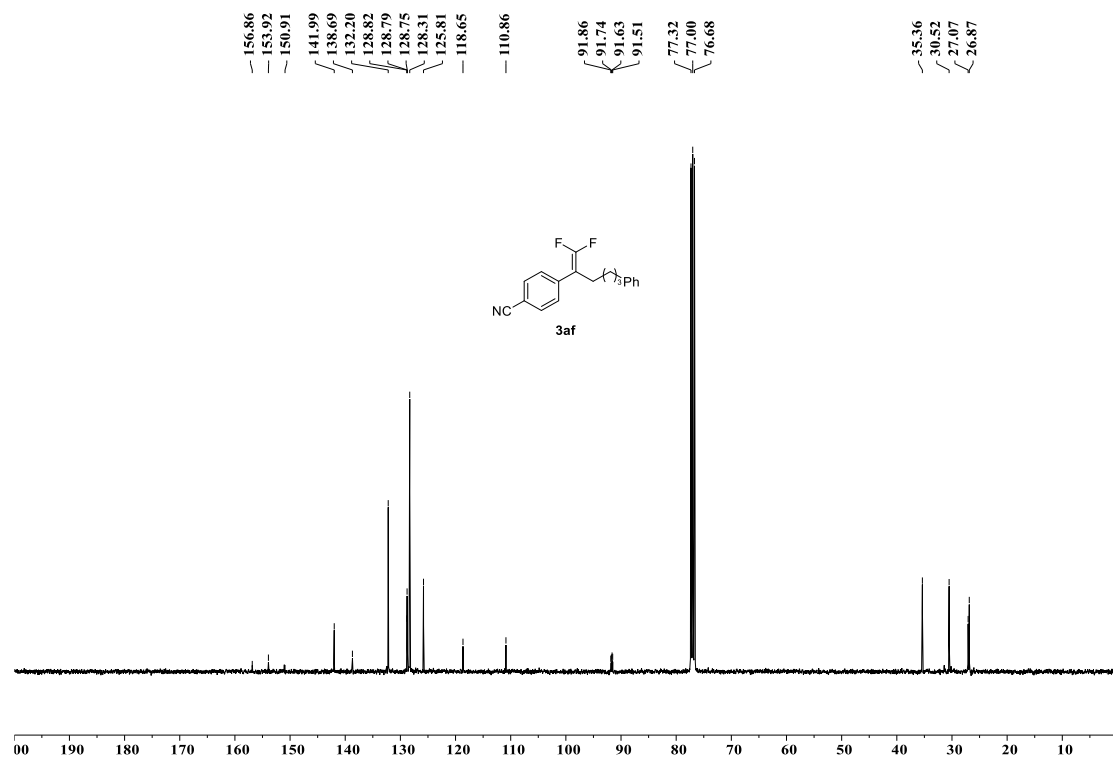

$^{19}\text{F}$  NMR (376 MHz,  $\text{CDCl}_3$ )

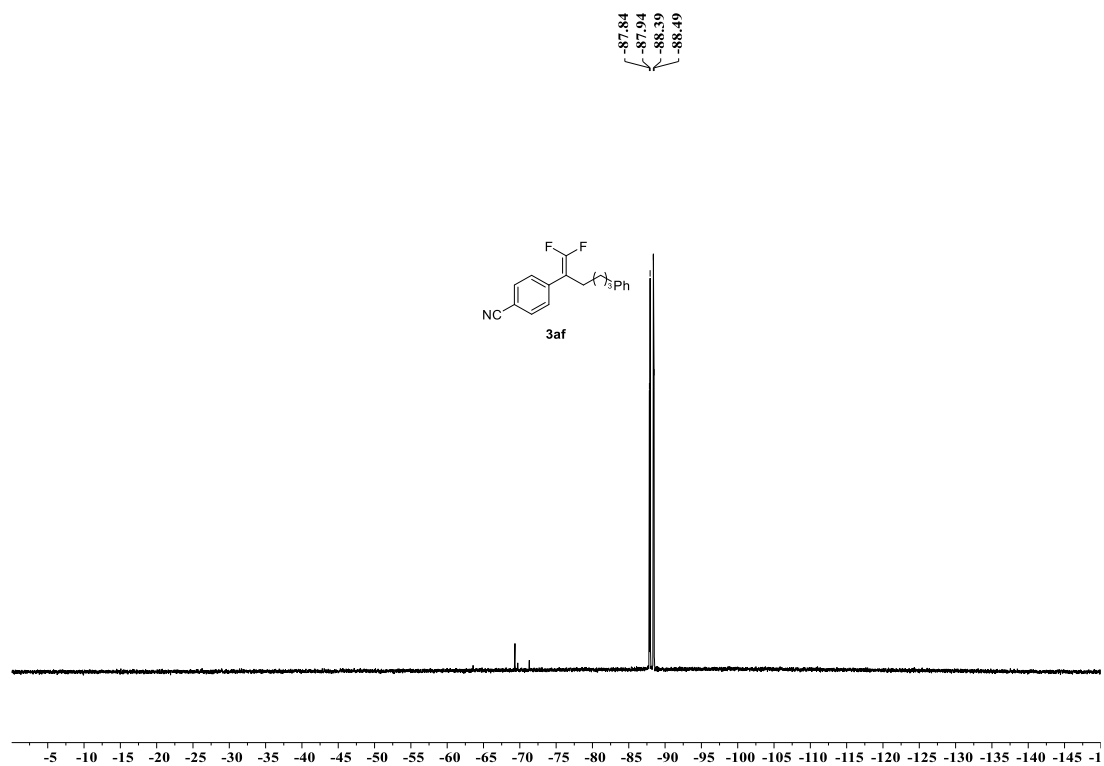

$^1\text{H}$  NMR (400 MHz,  $\text{CDCl}_3$ )

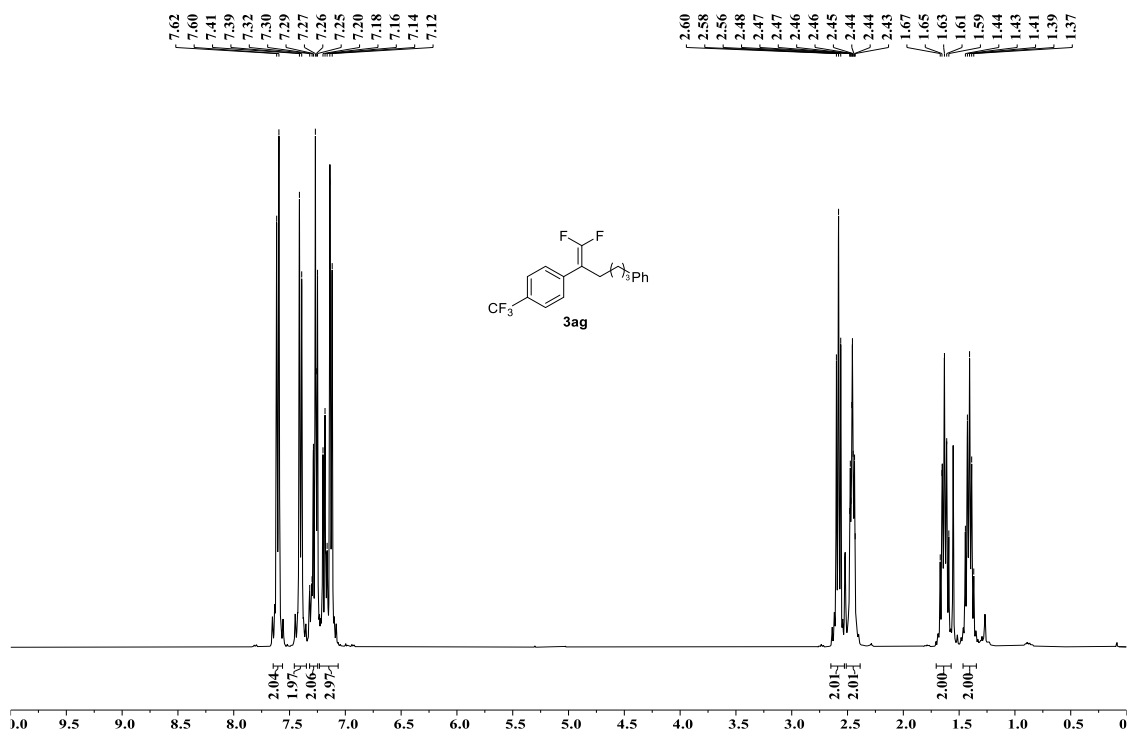

$^{13}\text{C}$  NMR (100 MHz,  $\text{CDCl}_3$ )

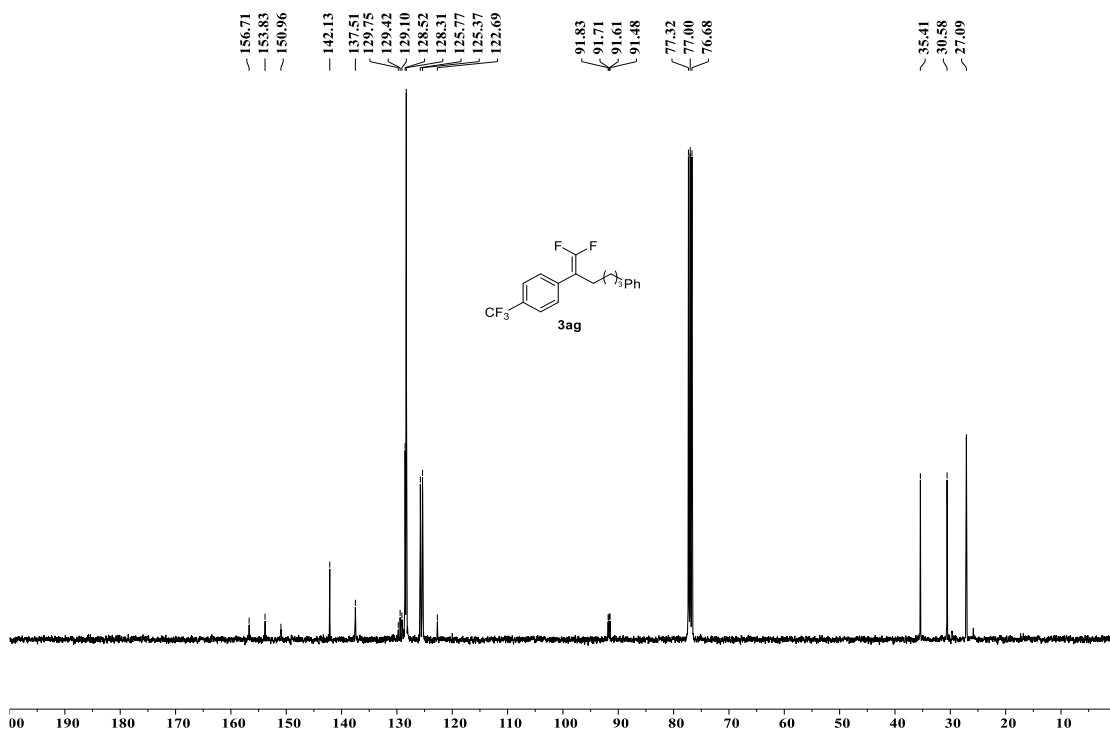

$^{19}\text{F}$  NMR (376 MHz,  $\text{CDCl}_3$ )

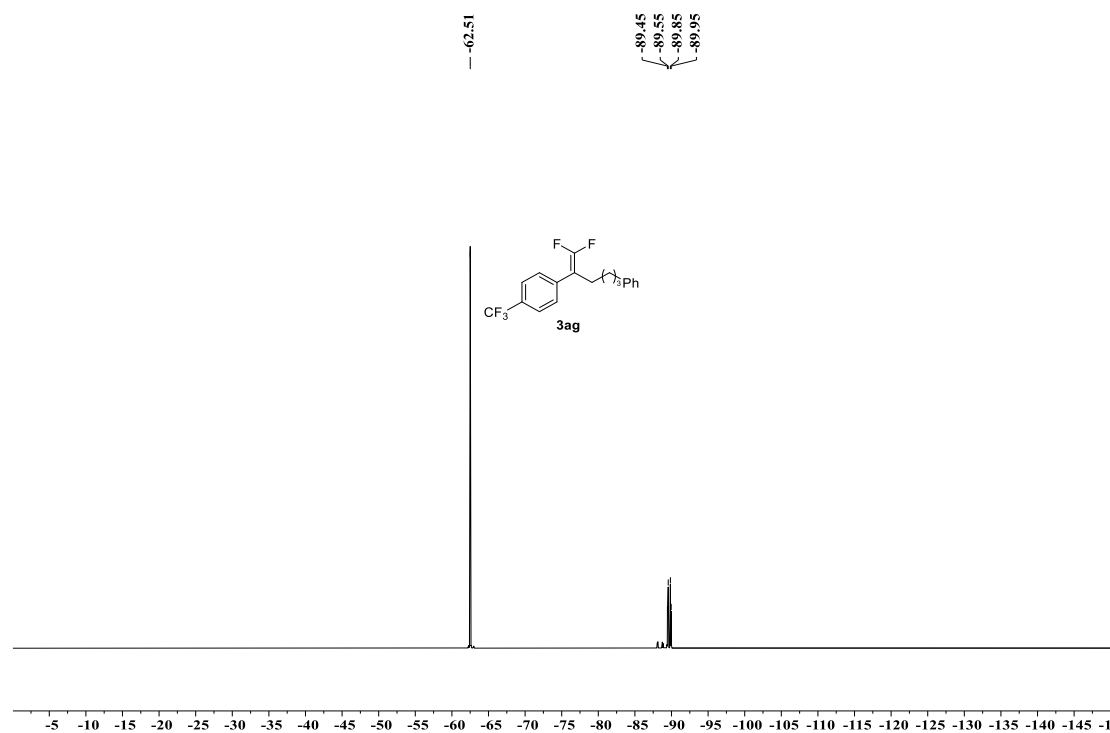



$^1\text{H}$  NMR (400 MHz,  $\text{CDCl}_3$ )

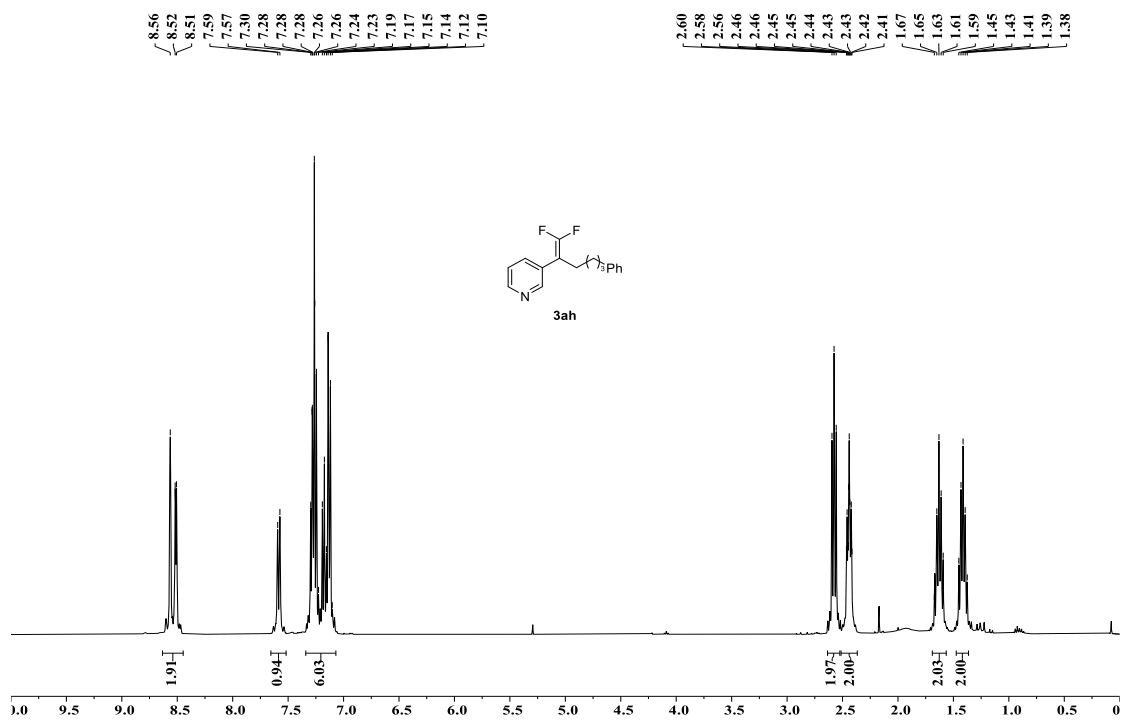

$^{13}\text{C}$  NMR (100 MHz,  $\text{CDCl}_3$ )

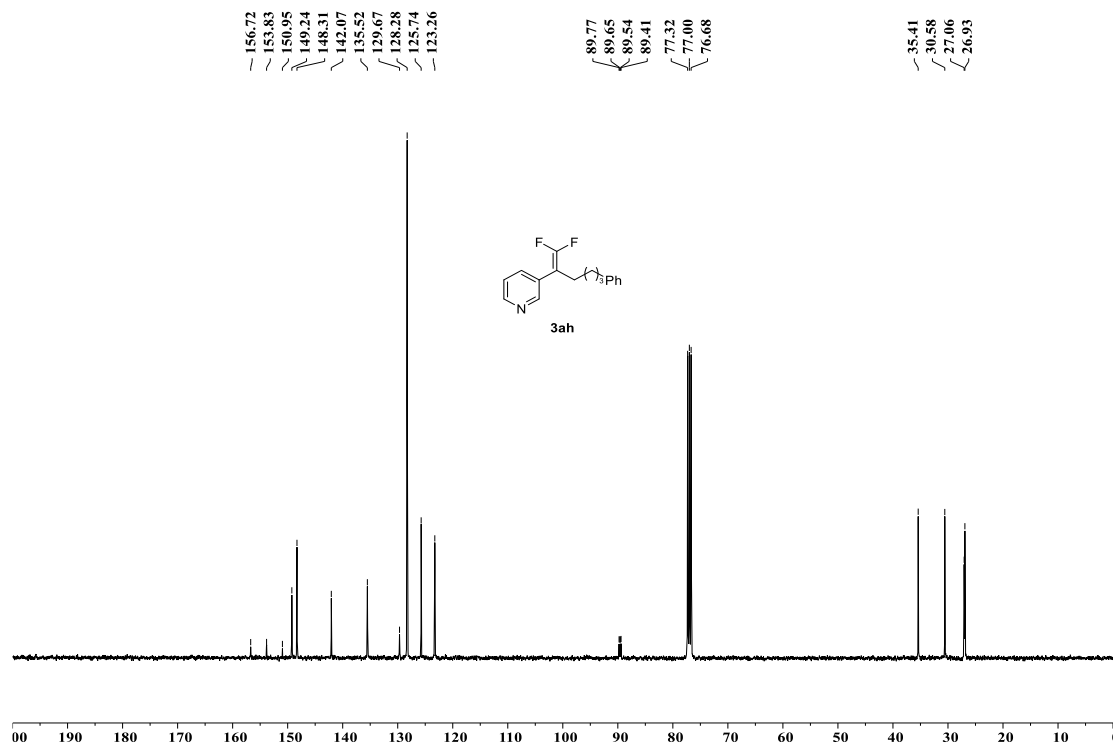

$^{19}\text{F}$  NMR (376 MHz,  $\text{CDCl}_3$ )

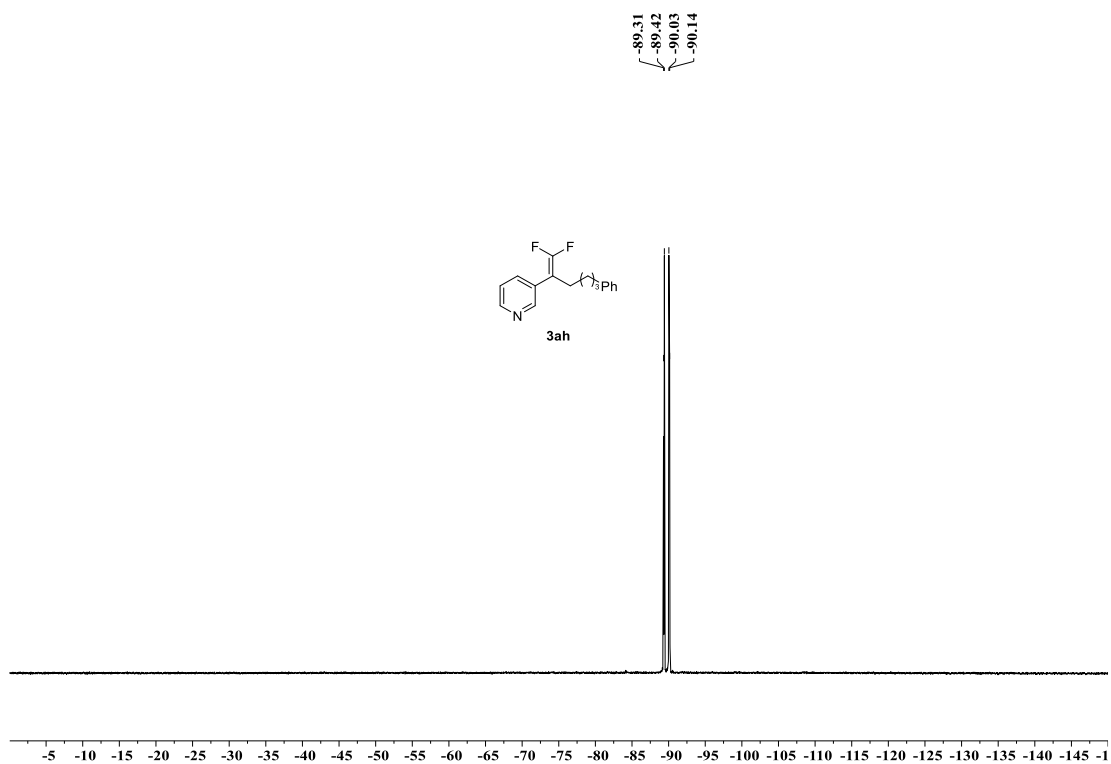

$^1\text{H}$  NMR (400 MHz,  $\text{CDCl}_3$ )

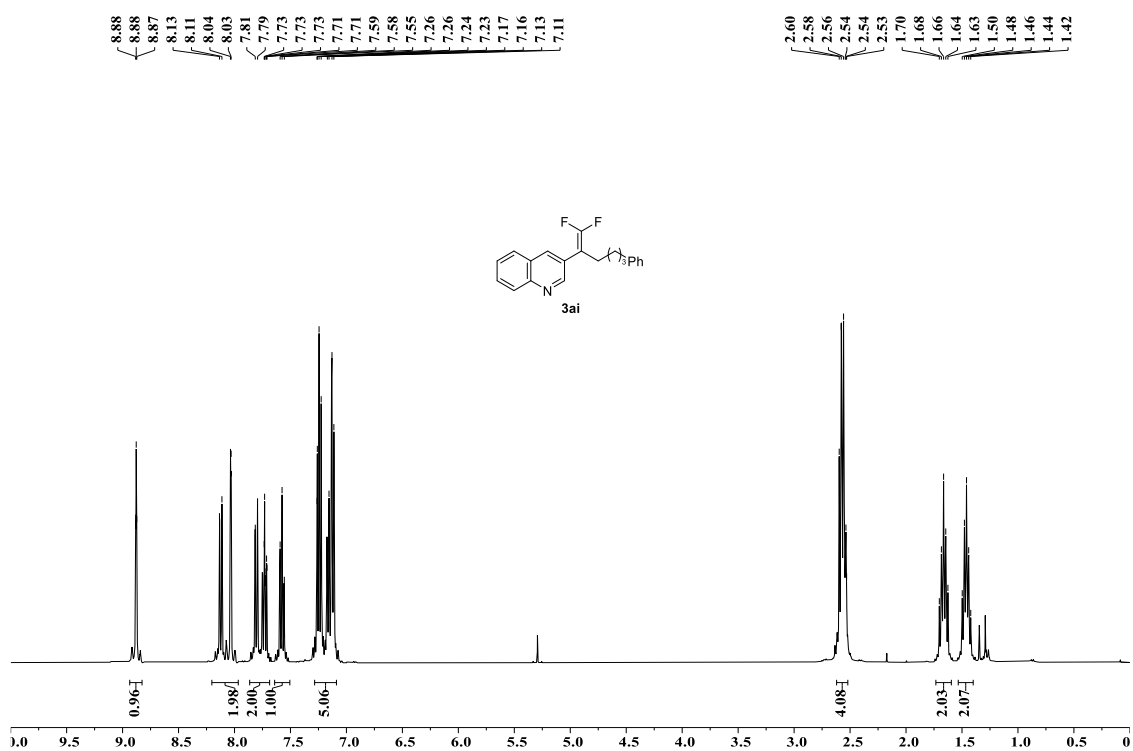

<sup>13</sup>C NMR (100 MHz, CDCl<sub>3</sub>)

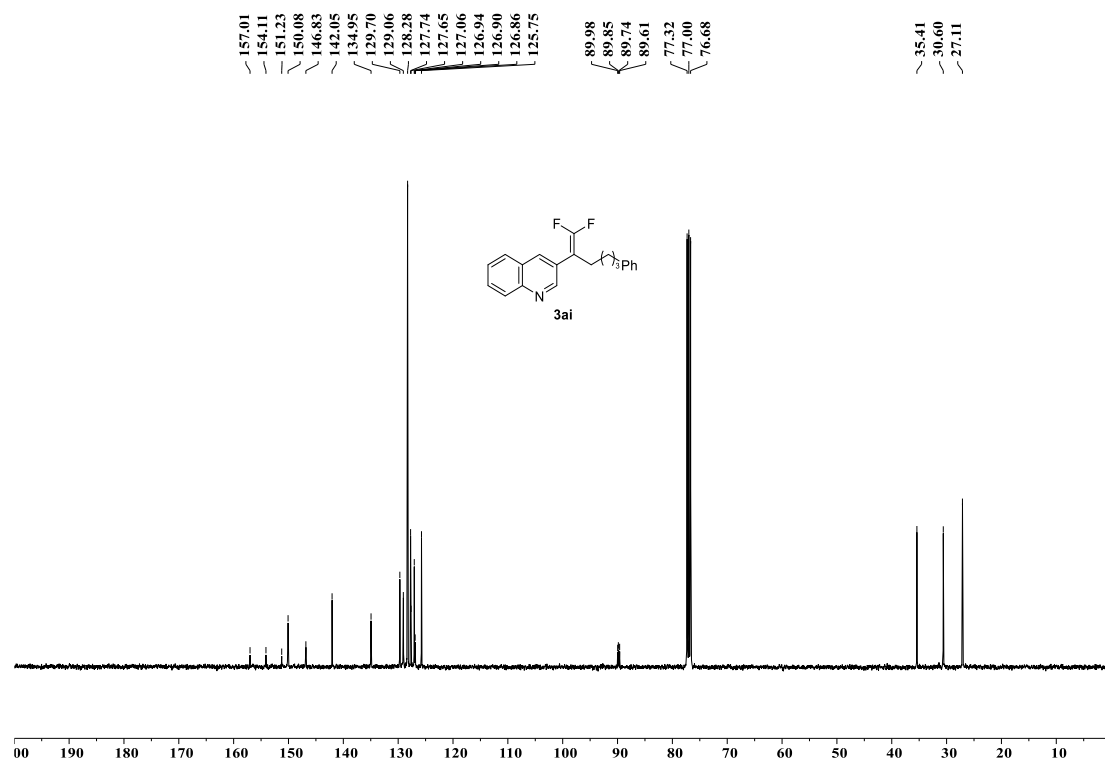

<sup>19</sup>F NMR (376 MHz, CDCl<sub>3</sub>)

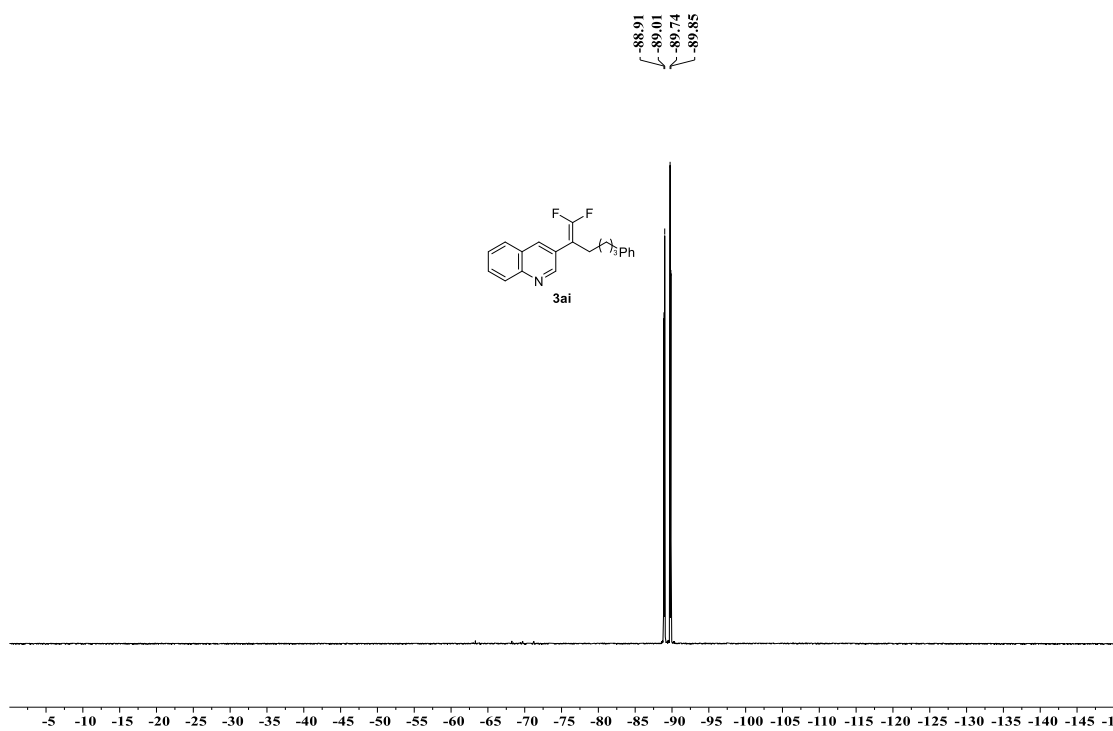

$^1\text{H}$  NMR (400 MHz,  $\text{CDCl}_3$ )

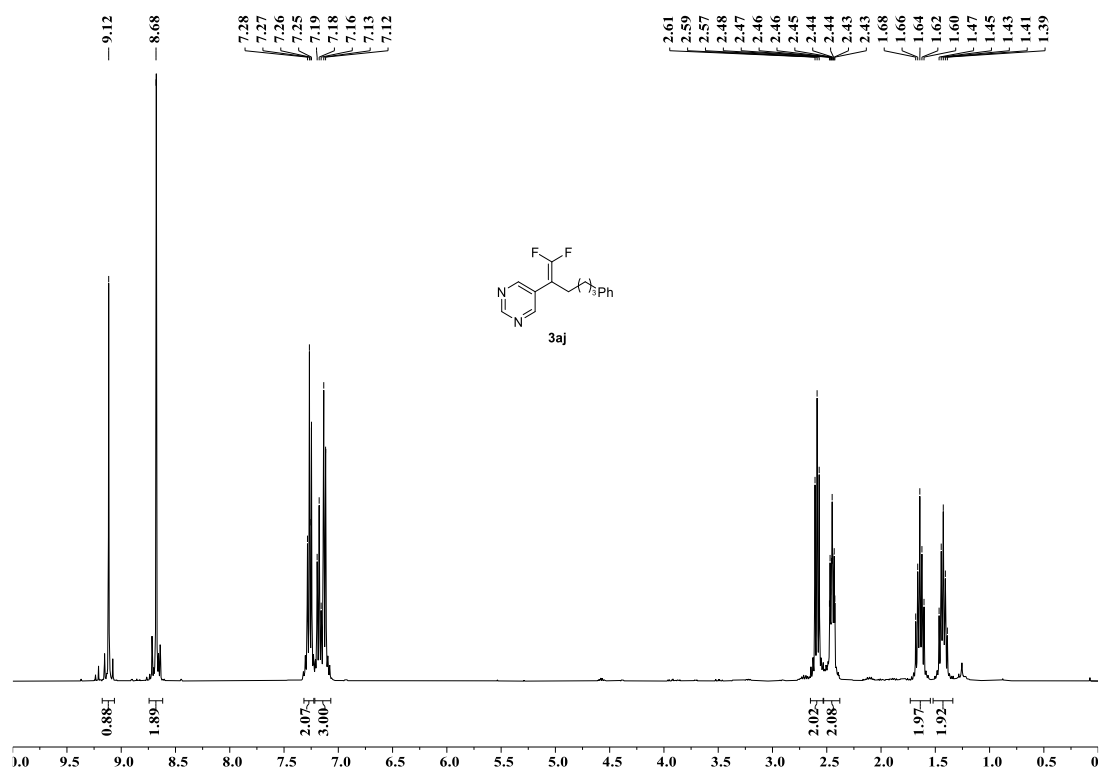

$^{13}\text{C}$  NMR (100 MHz,  $\text{CDCl}_3$ )

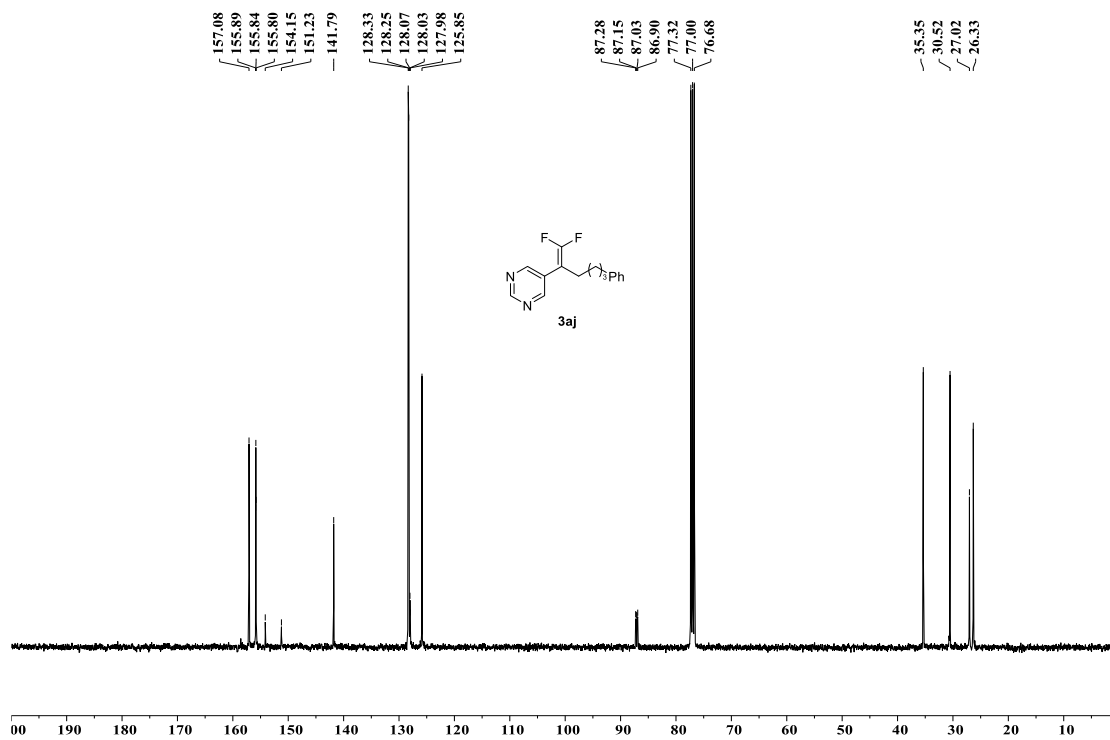

$^{19}\text{F}$  NMR (376 MHz,  $\text{CDCl}_3$ )

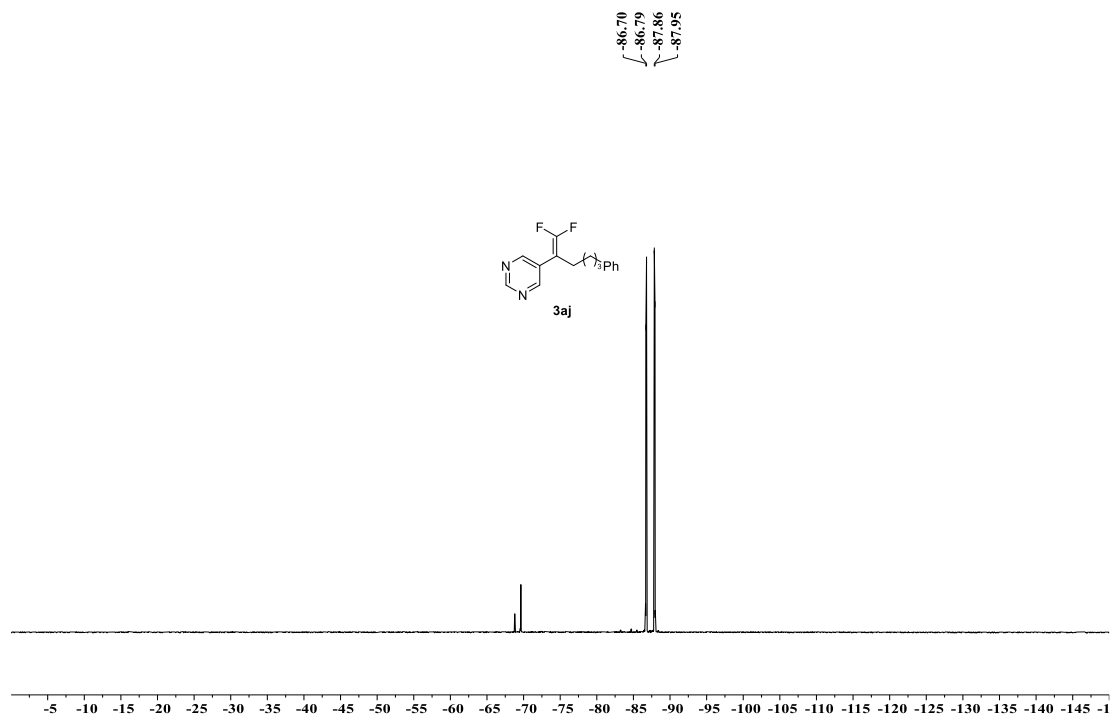

$^1\text{H}$  NMR (400 MHz,  $\text{CDCl}_3$ )

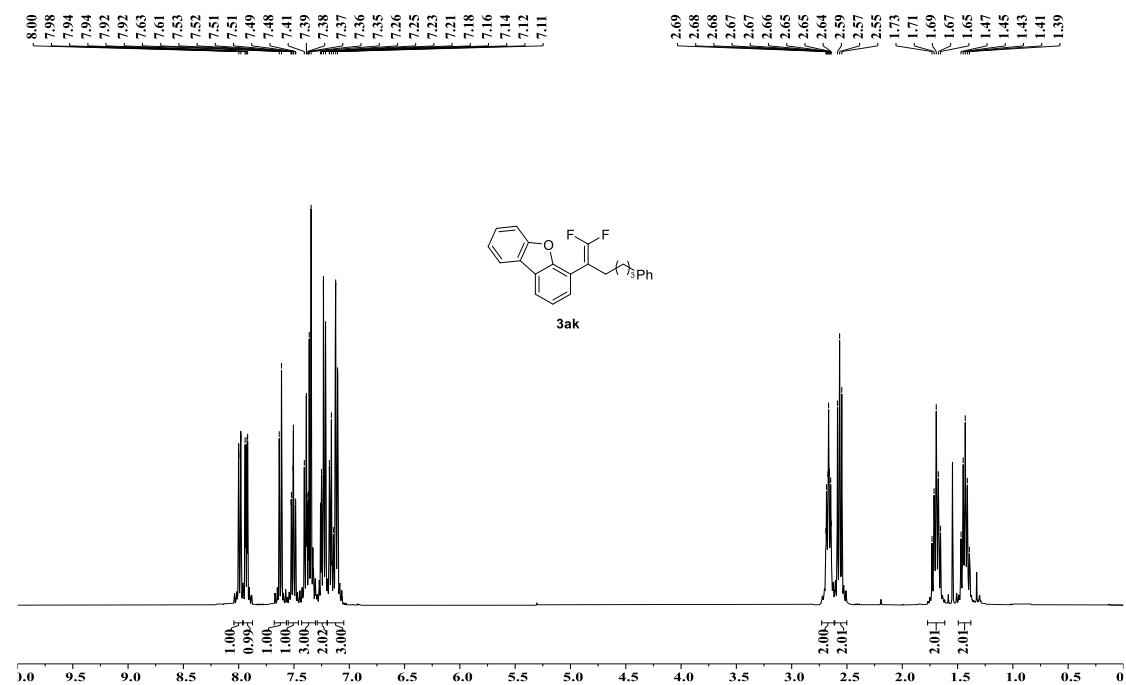

$^{13}\text{C}$  NMR (100 MHz,  $\text{CDCl}_3$ )

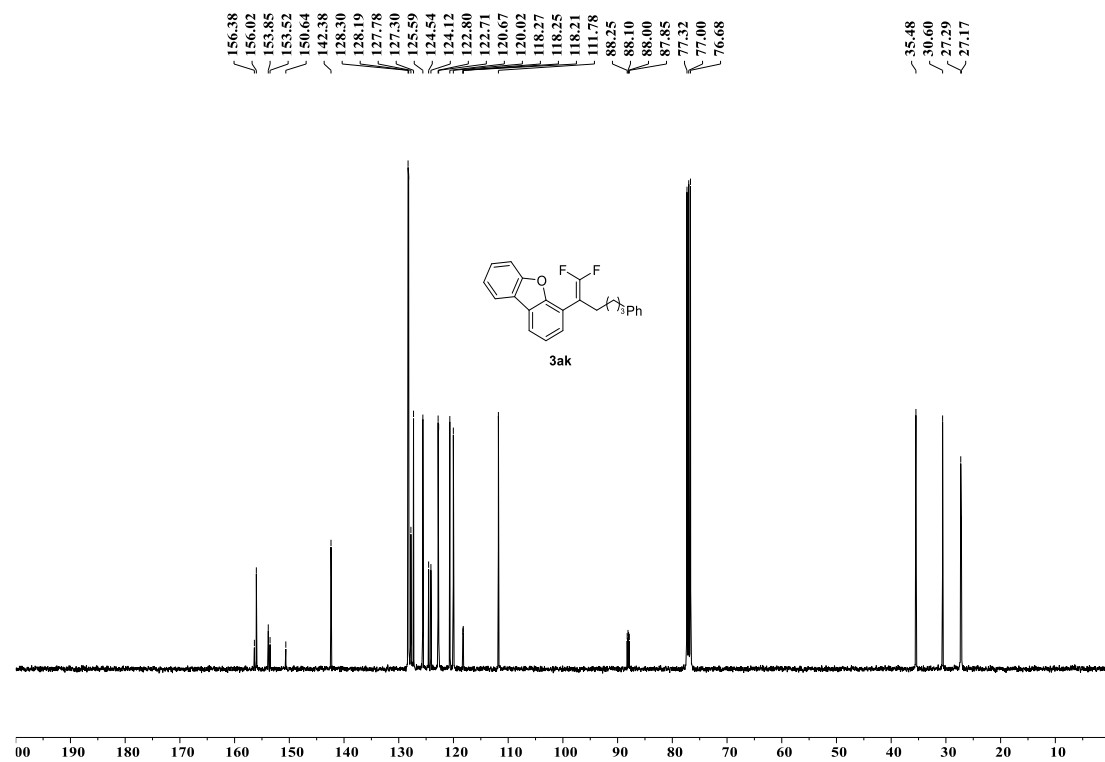

$^{19}\text{F}$  NMR (376 MHz,  $\text{CDCl}_3$ )

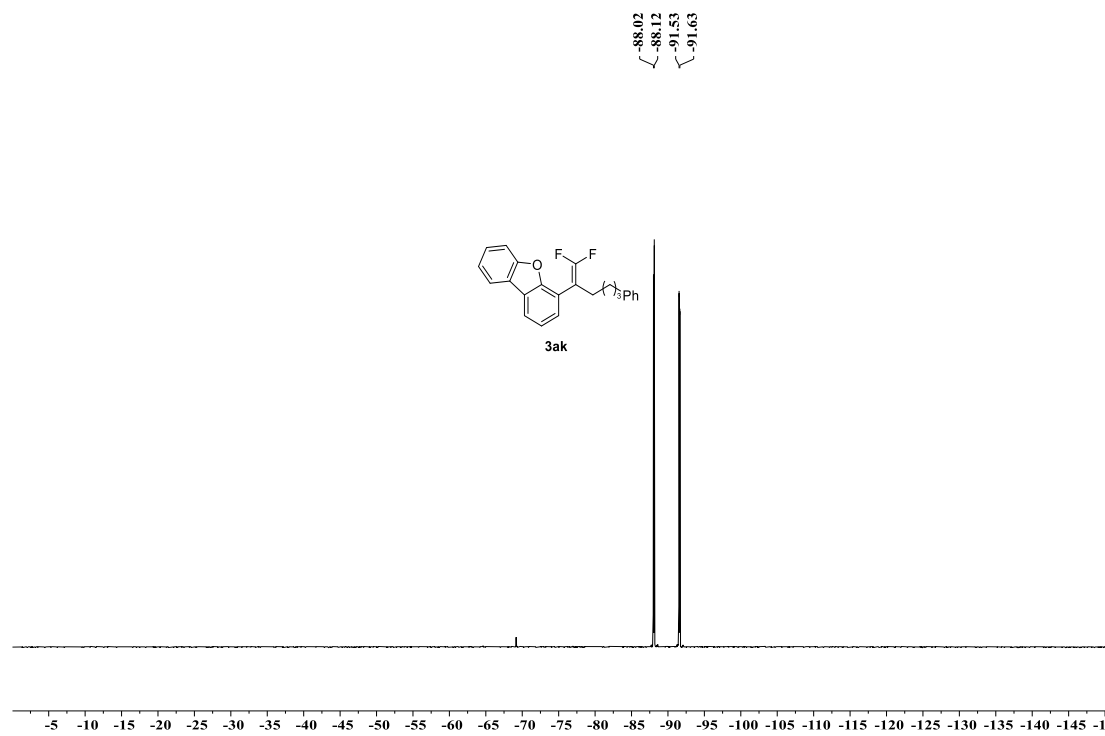

$^1\text{H}$  NMR (400 MHz,  $\text{CDCl}_3$ )

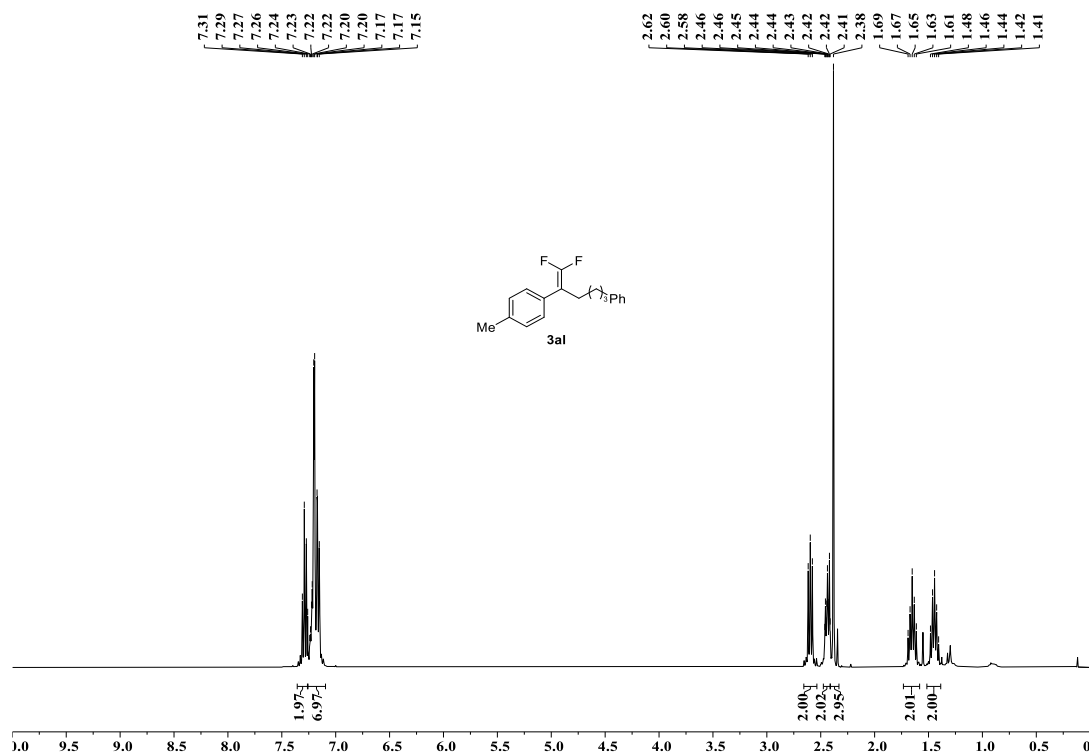

$^{13}\text{C}$  NMR (100 MHz,  $\text{CDCl}_3$ )

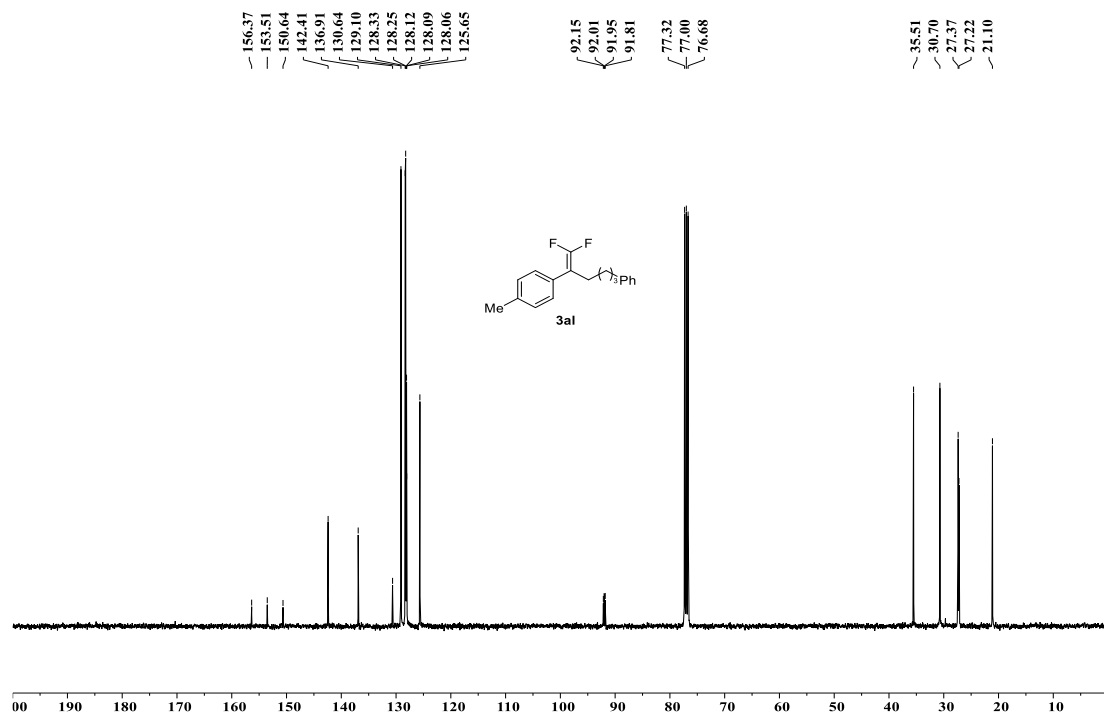

$^{19}\text{F}$  NMR (376 MHz,  $\text{CDCl}_3$ )

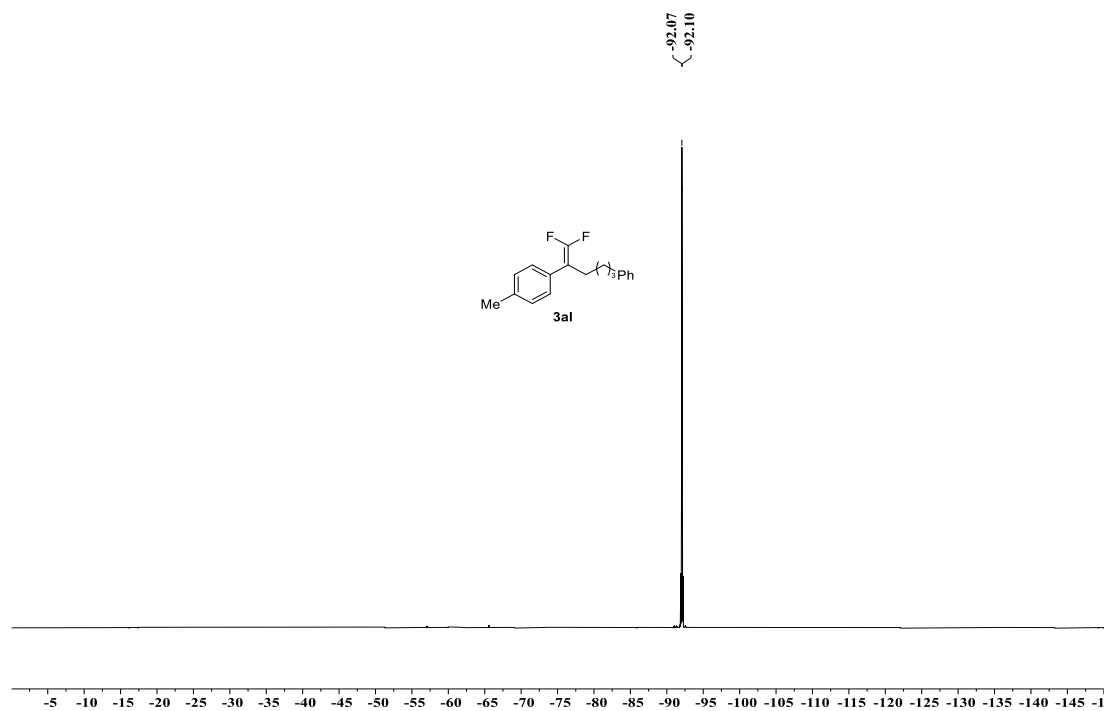

$^1\text{H}$  NMR (400 MHz,  $\text{CDCl}_3$ )

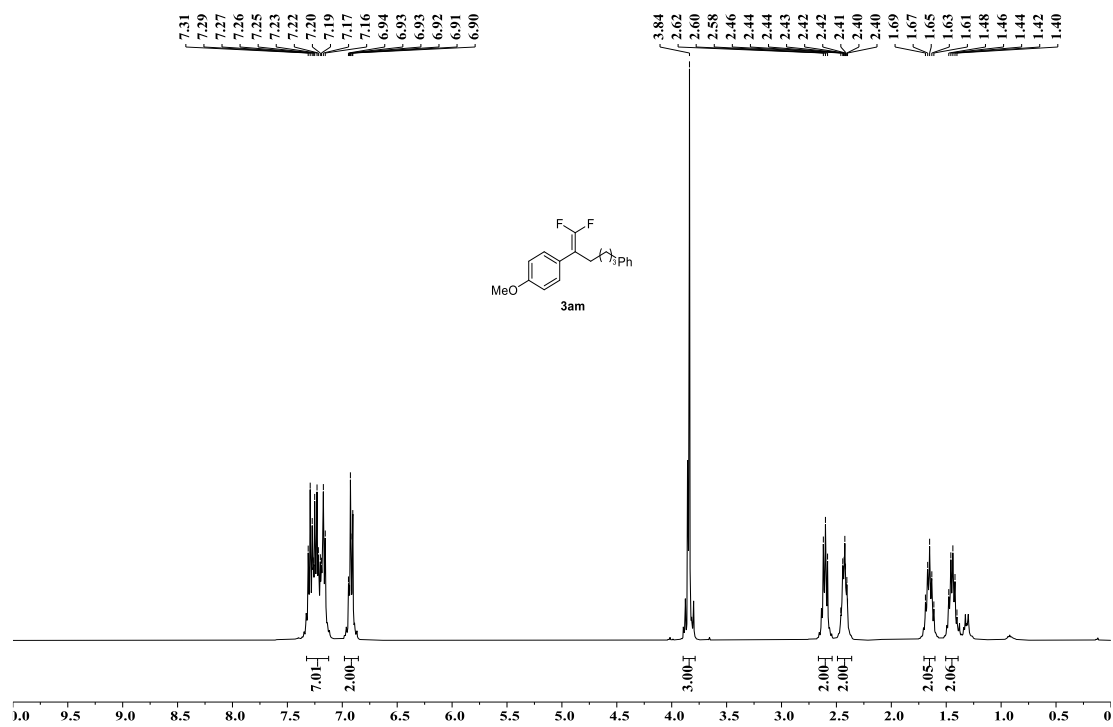



$^{13}\text{C}$  NMR (100 MHz,  $\text{CDCl}_3$ )

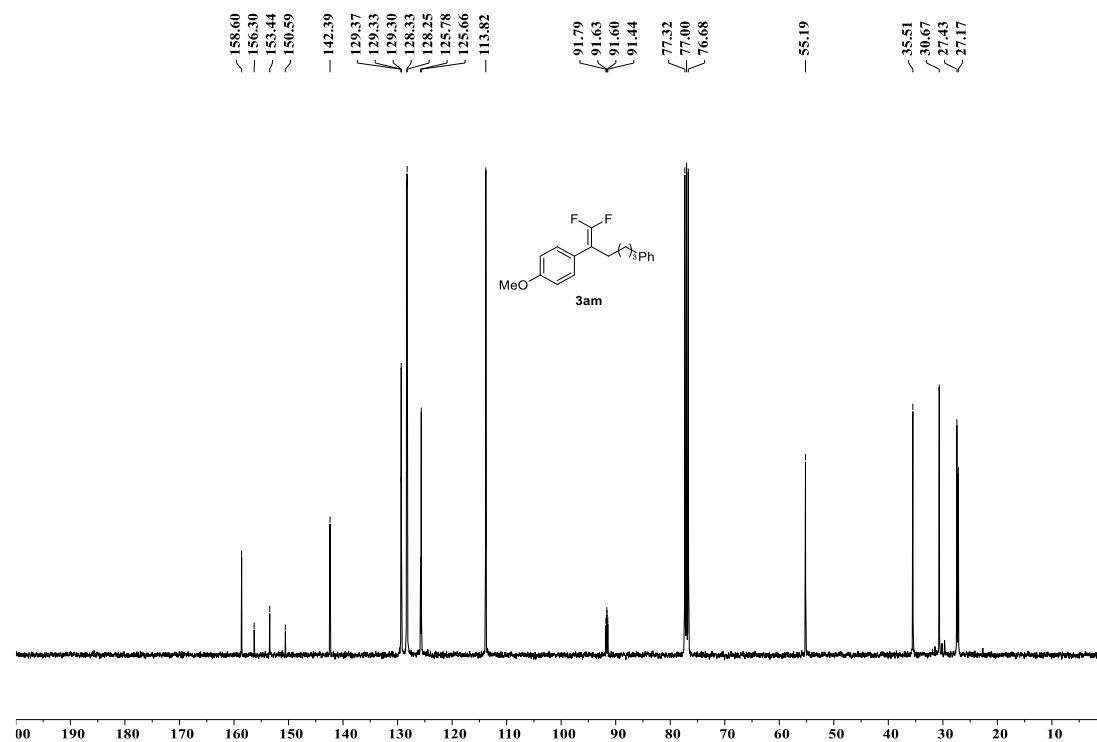

$^{19}\text{F}$  NMR (376 MHz,  $\text{CDCl}_3$ )

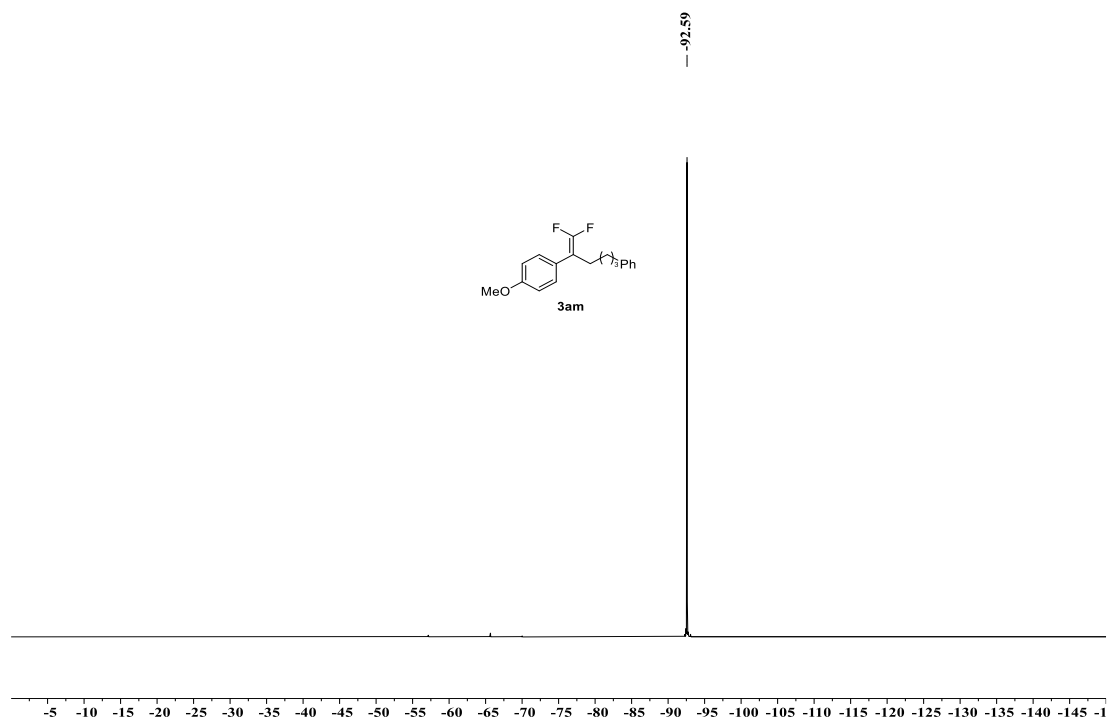

$^1\text{H}$  NMR (400 MHz,  $\text{CDCl}_3$ )

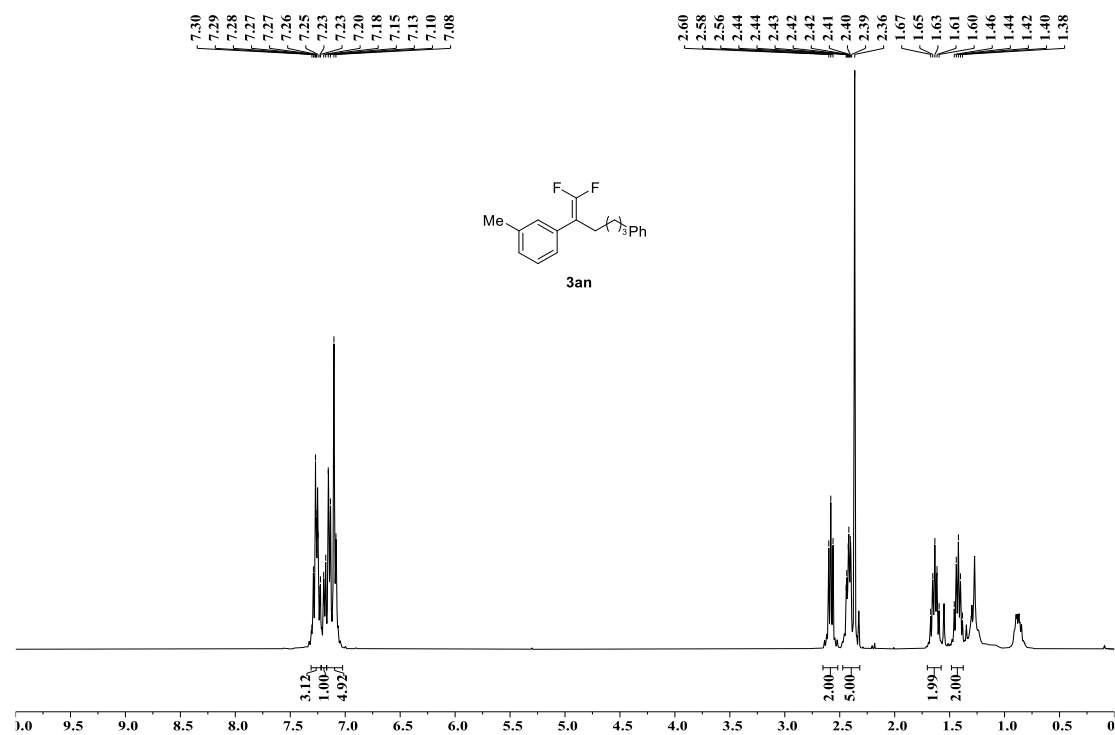

$^{13}\text{C}$  NMR (100 MHz,  $\text{CDCl}_3$ )

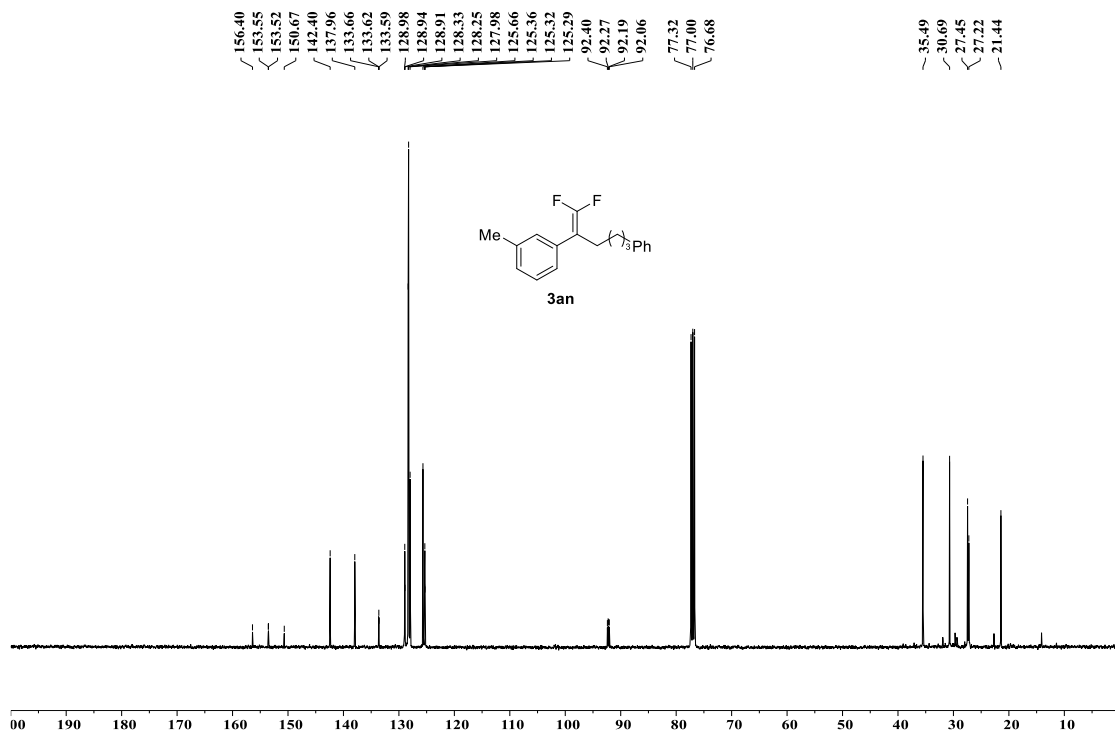

$^{19}\text{F}$  NMR (376 MHz,  $\text{CDCl}_3$ )

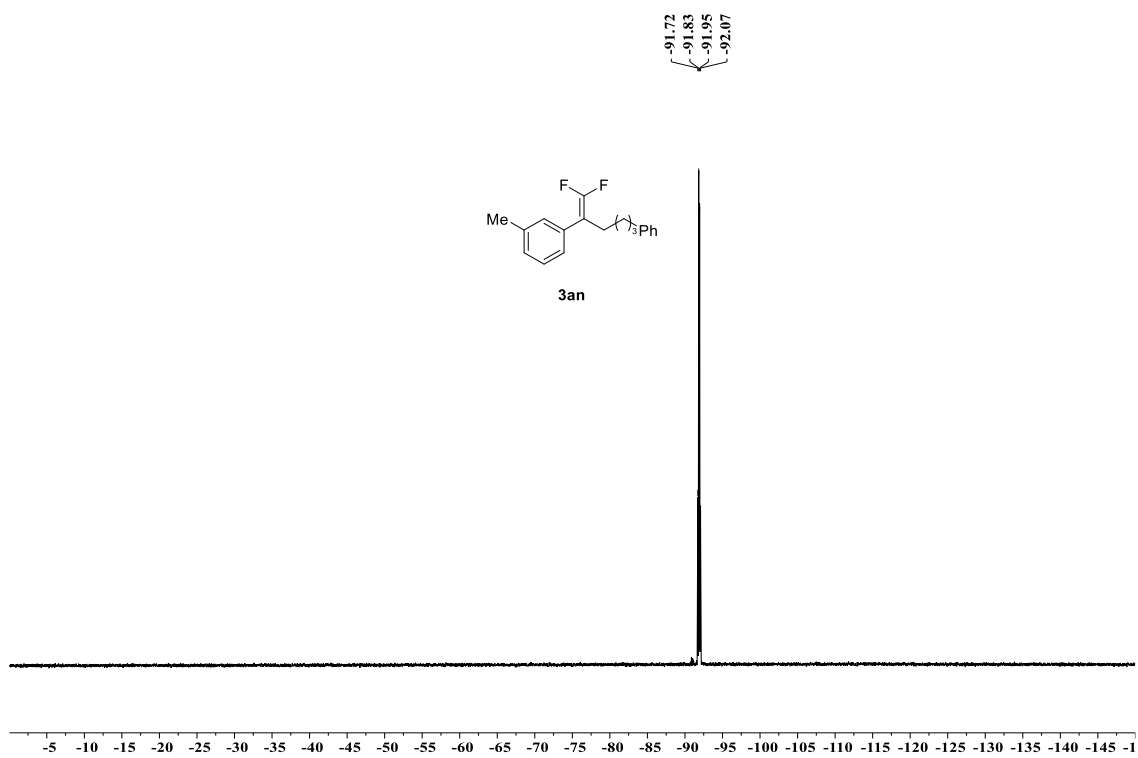

$^1\text{H}$  NMR (400 MHz,  $\text{CDCl}_3$ )

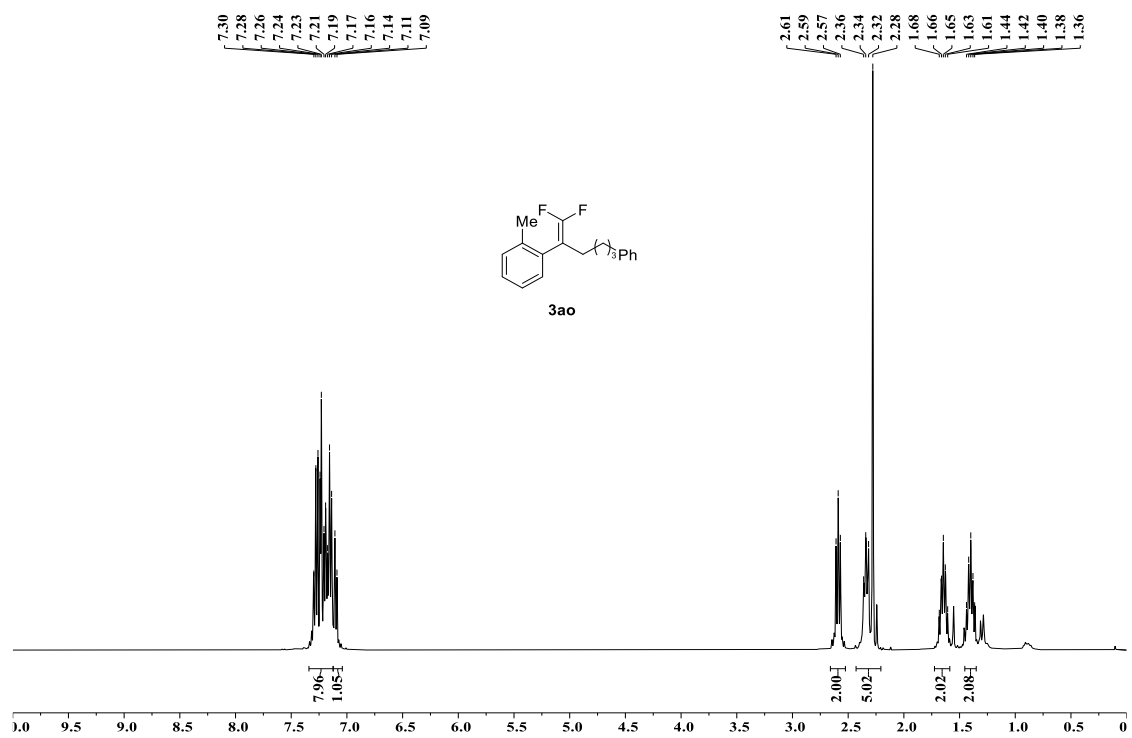

<sup>13</sup>C NMR (100 MHz, CDCl<sub>3</sub>)

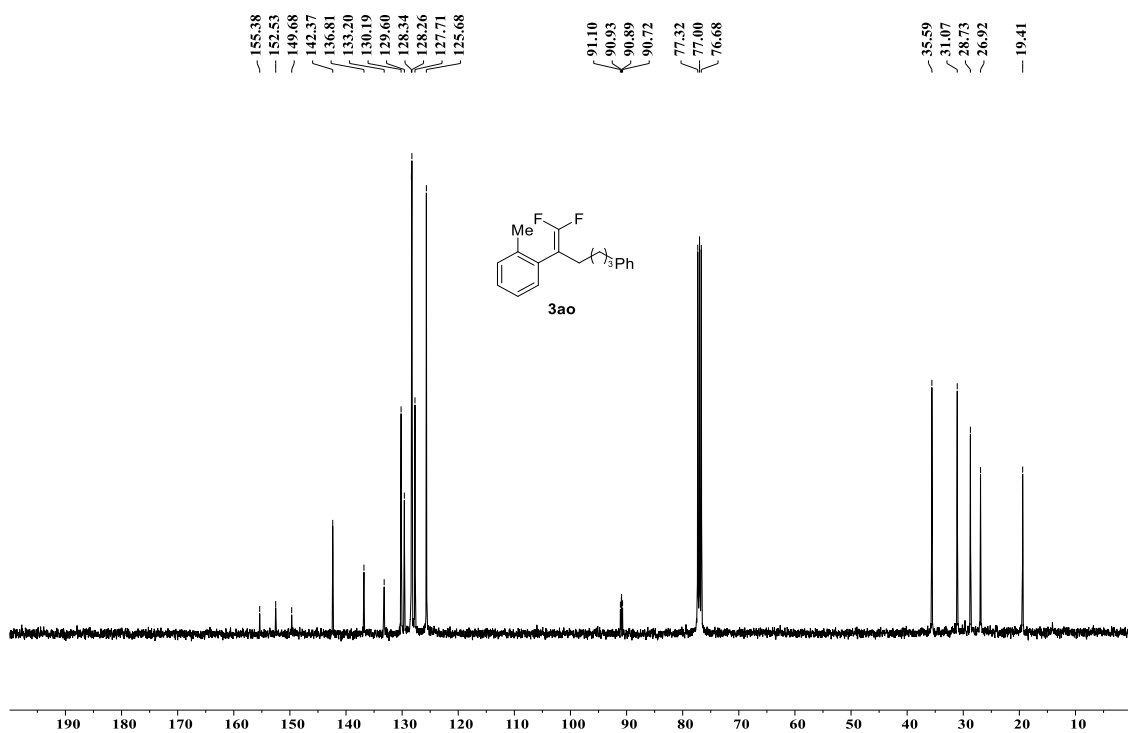

<sup>19</sup>F NMR (376 MHz, CDCl<sub>3</sub>)

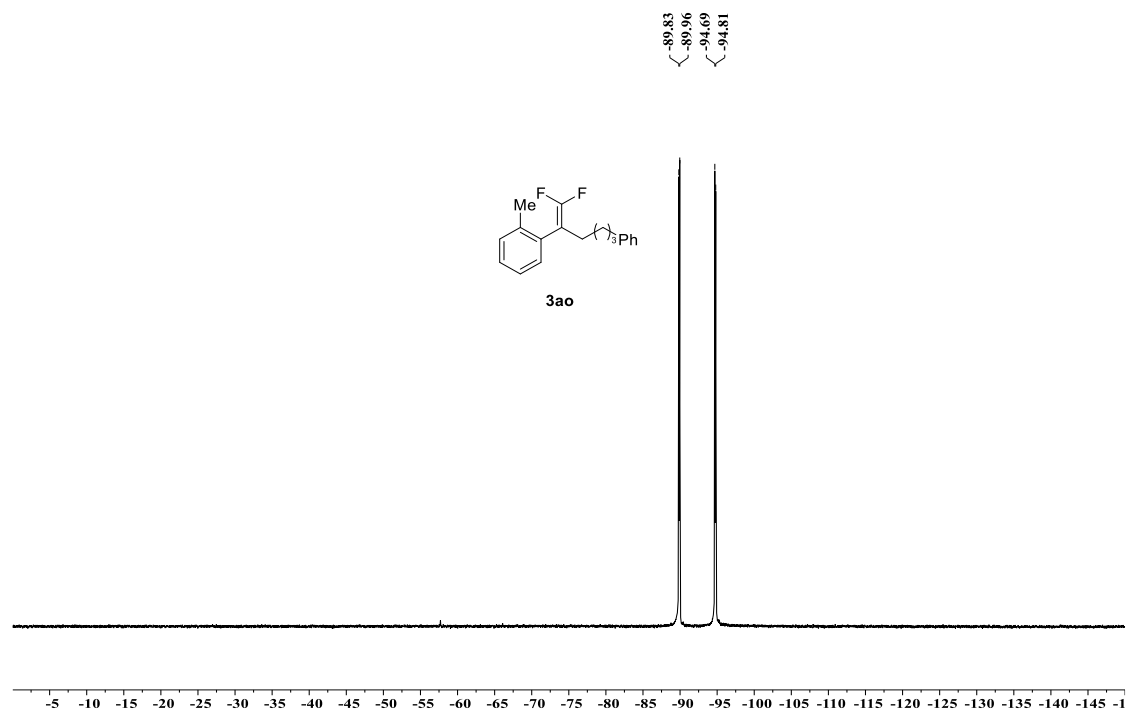

$^1\text{H}$  NMR (400 MHz,  $\text{CDCl}_3$ )

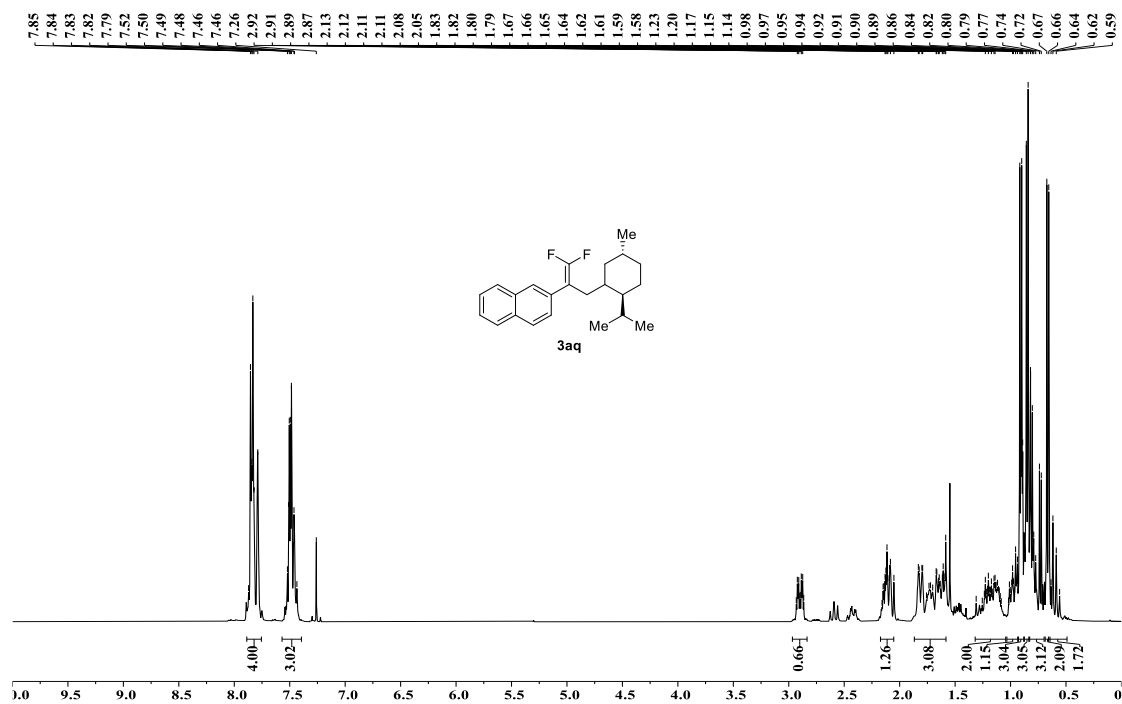

$^{13}\text{C}$  NMR (100 MHz,  $\text{CDCl}_3$ )

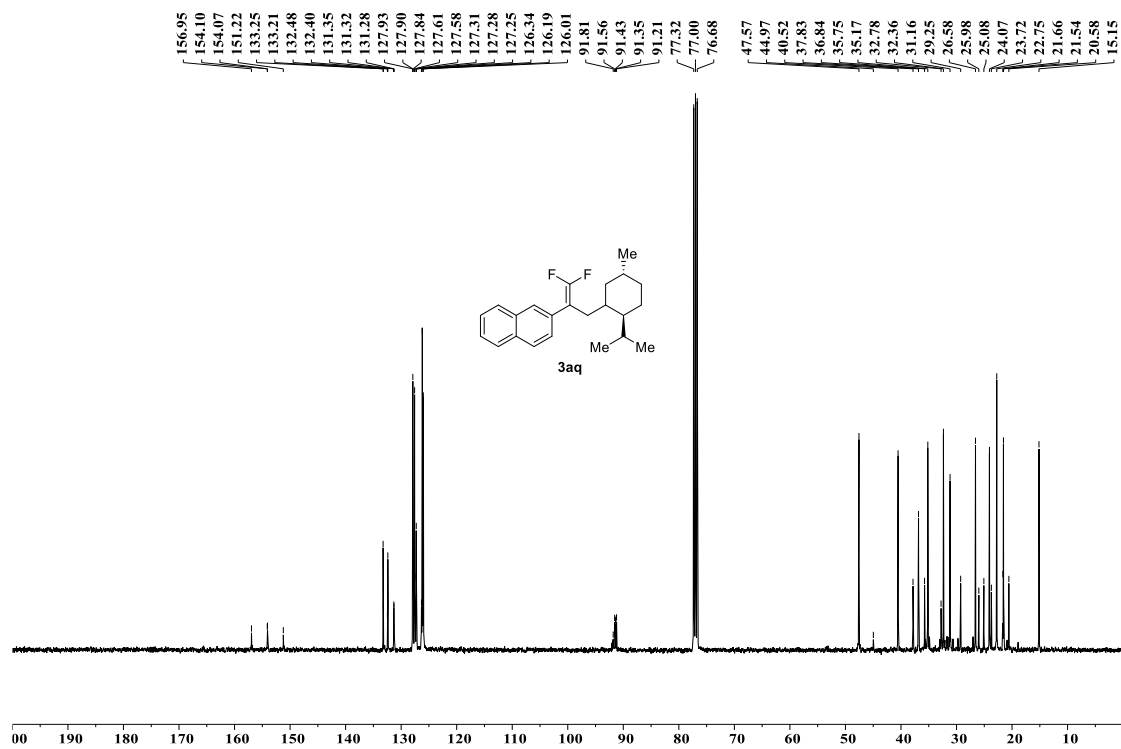

$^{19}\text{F}$  NMR (376 MHz,  $\text{CDCl}_3$ )

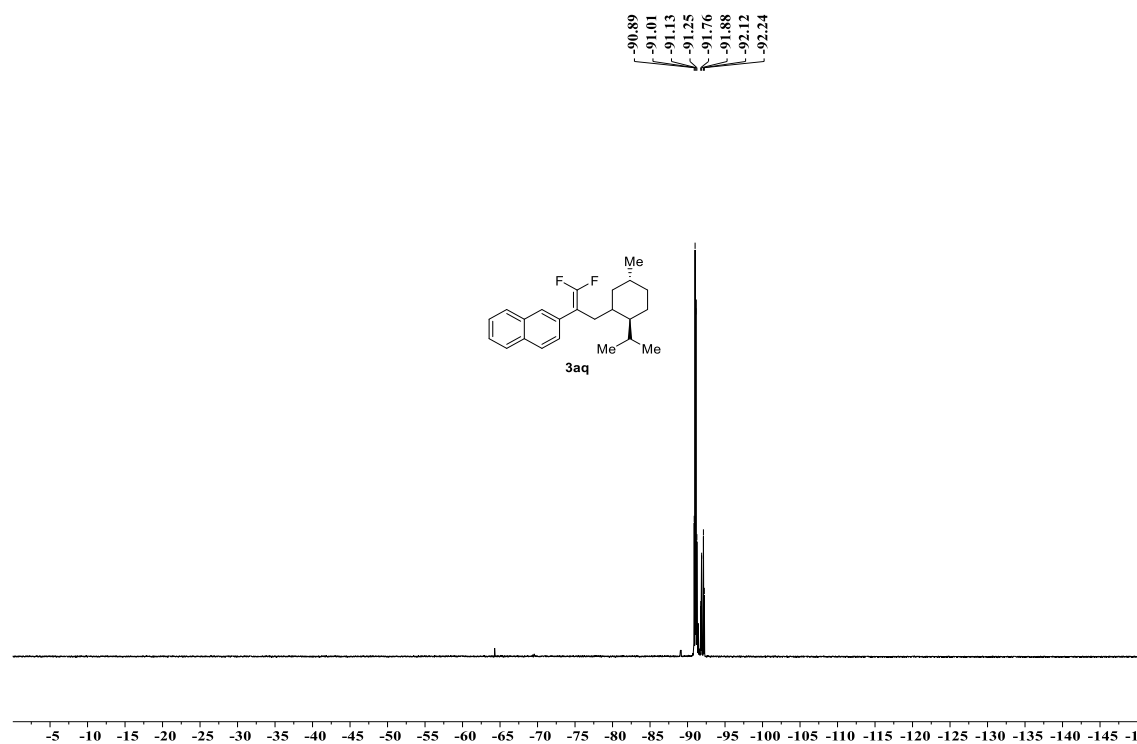

$^1\text{H}$  NMR (400 MHz,  $\text{CDCl}_3$ )

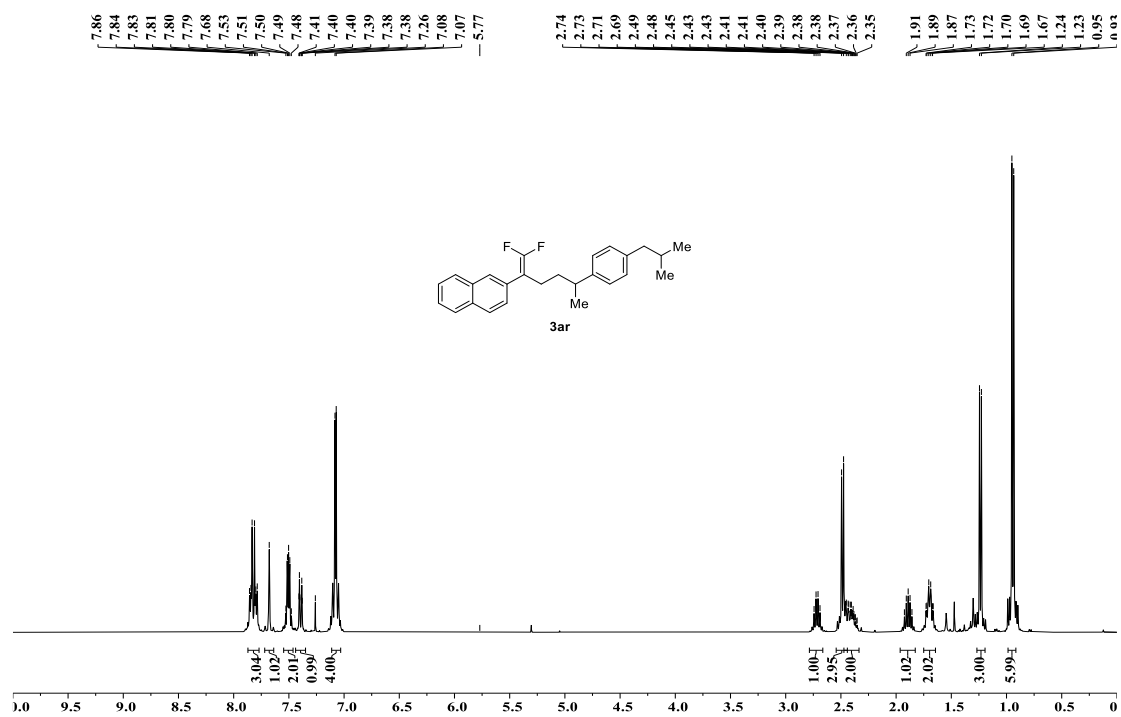

$^{13}\text{C}$  NMR (100 MHz,  $\text{CDCl}_3$ )

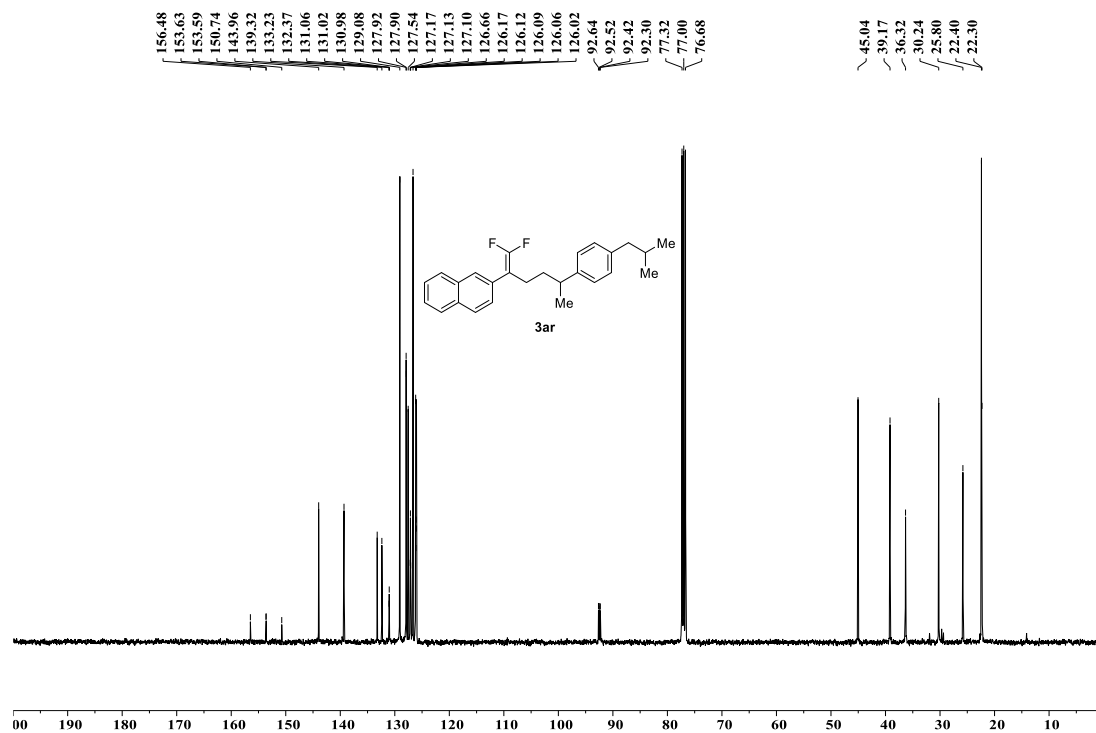

$^{19}\text{F}$  NMR (376 MHz,  $\text{CDCl}_3$ )

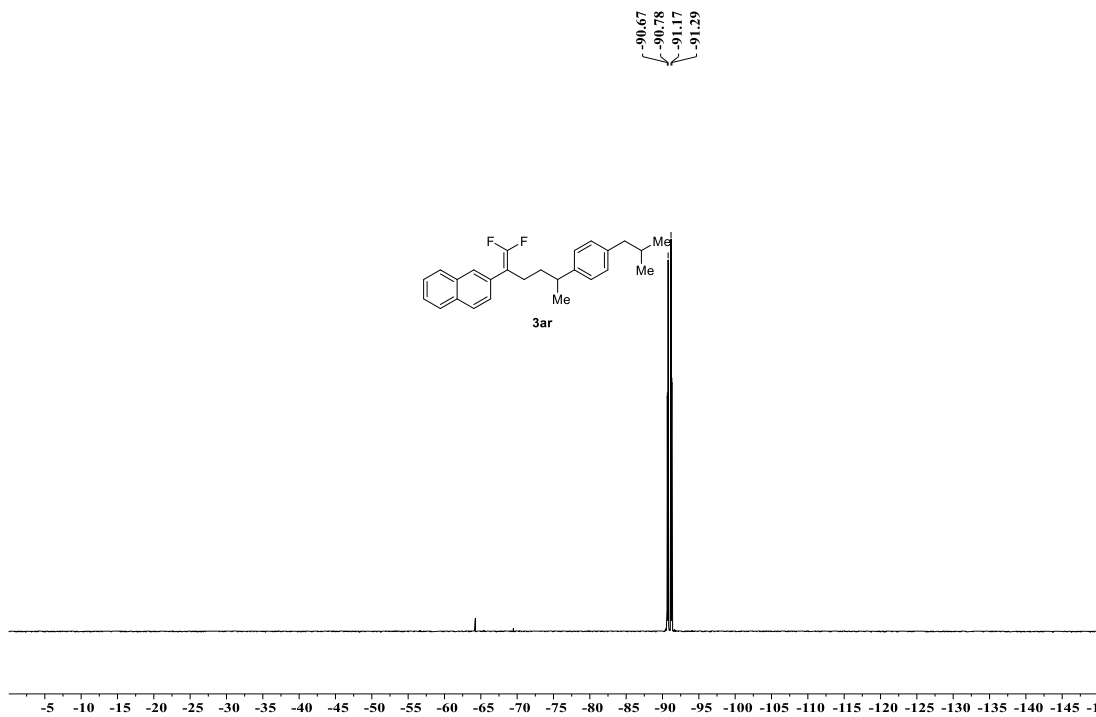

$^1\text{H}$  NMR (400 MHz,  $\text{CDCl}_3$ )

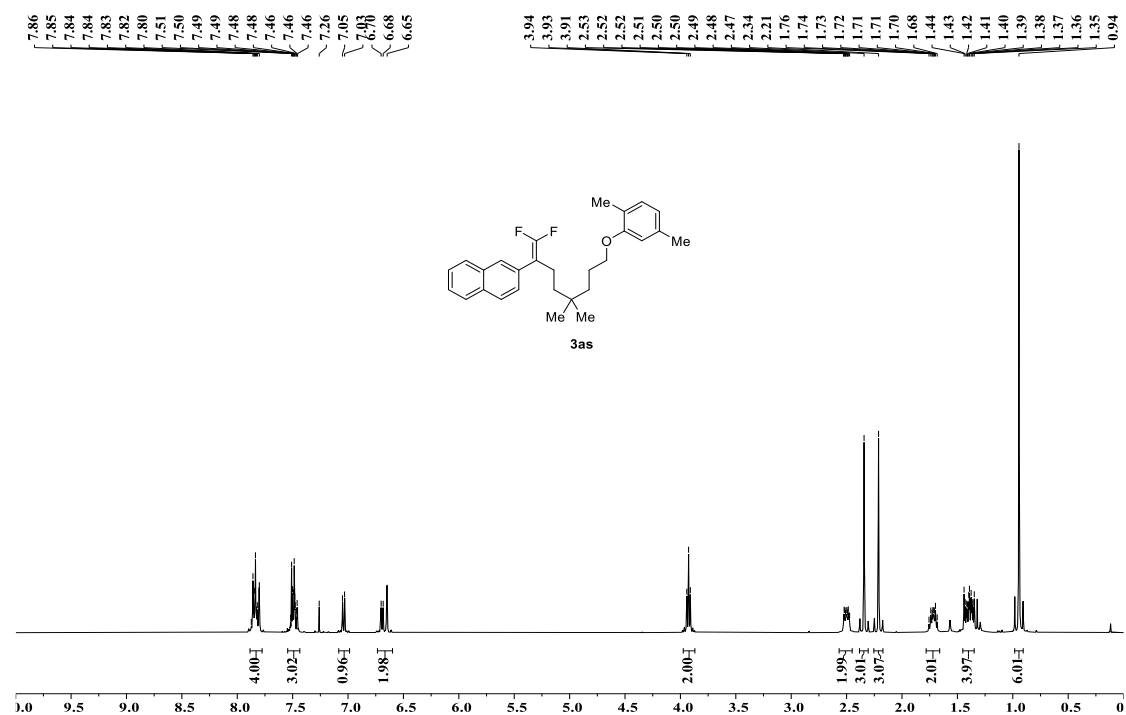

$^{13}\text{C}$  NMR (100 MHz,  $\text{CDCl}_3$ )

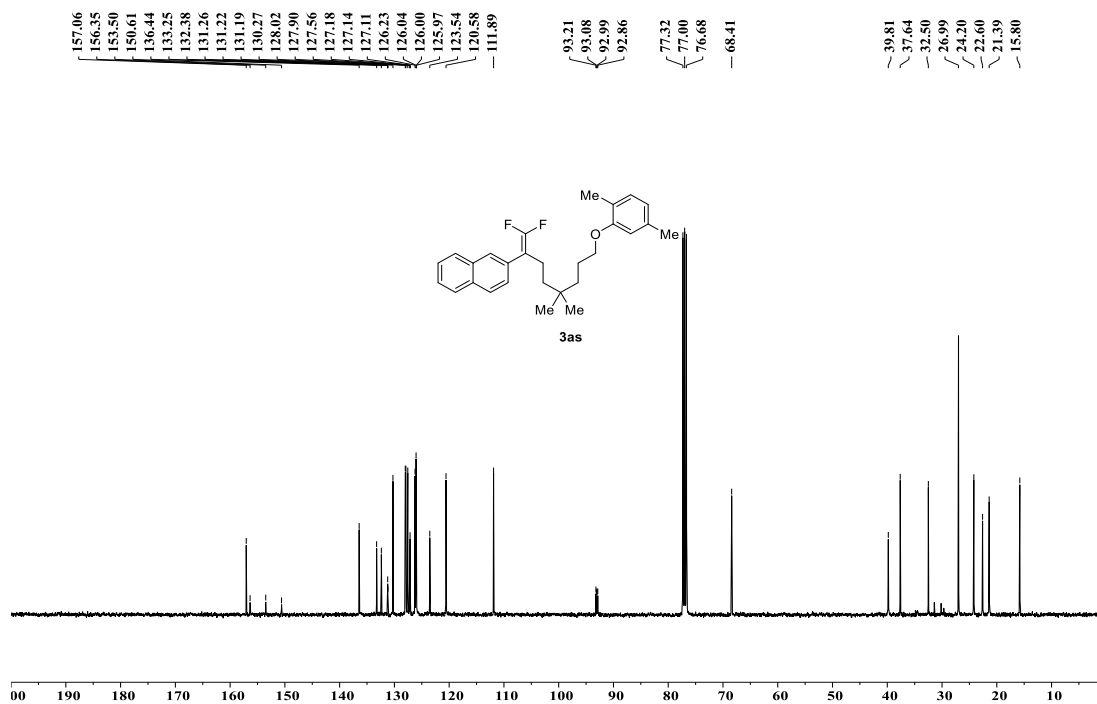



$^{19}\text{F}$  NMR (376 MHz,  $\text{CDCl}_3$ )

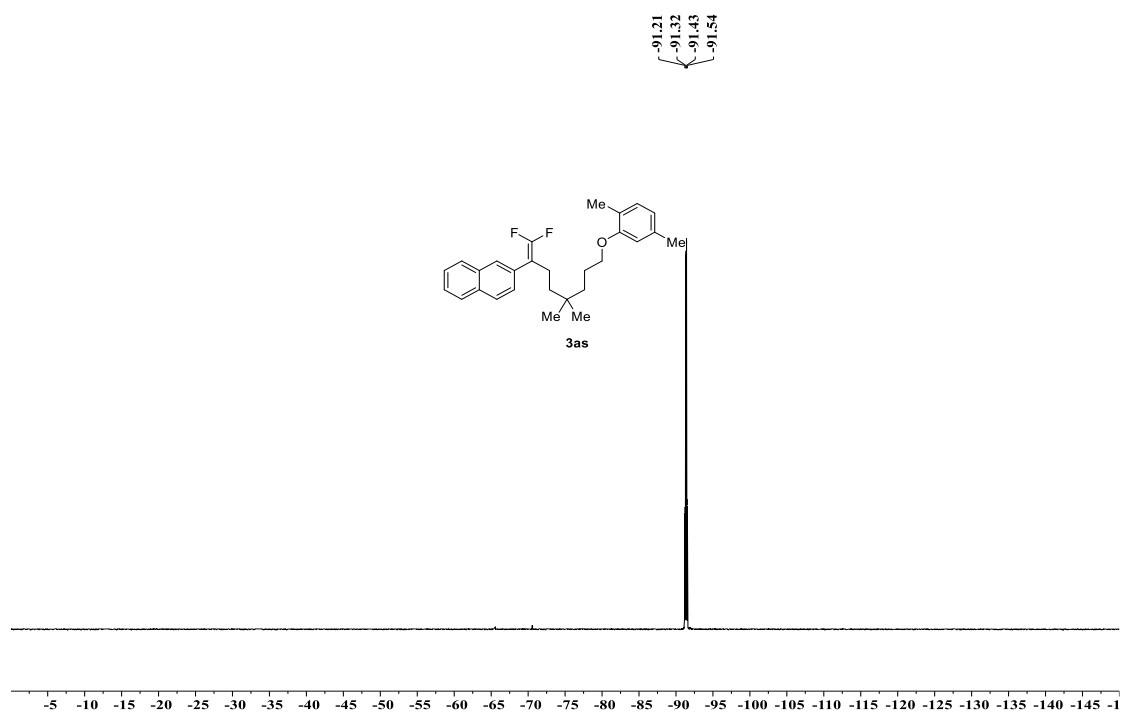

$^1\text{H}$  NMR (400 MHz,  $\text{CDCl}_3$ )

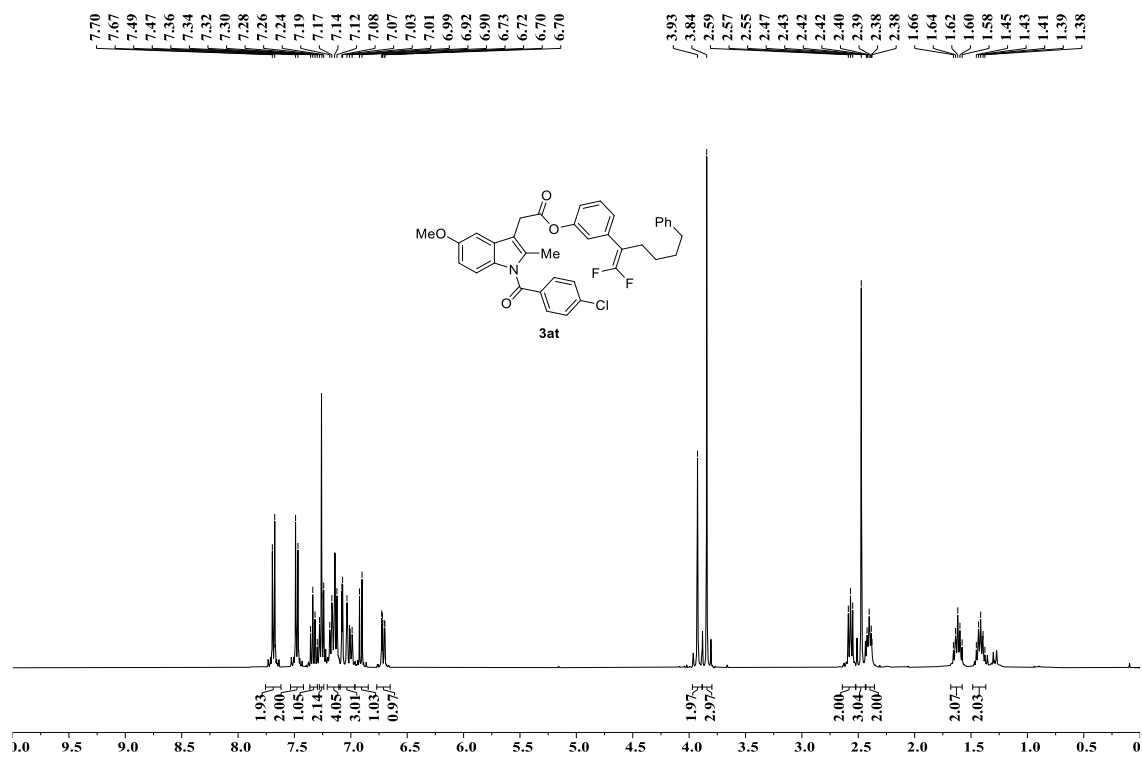

<sup>13</sup>C NMR (100 MHz, CDCl<sub>3</sub>)

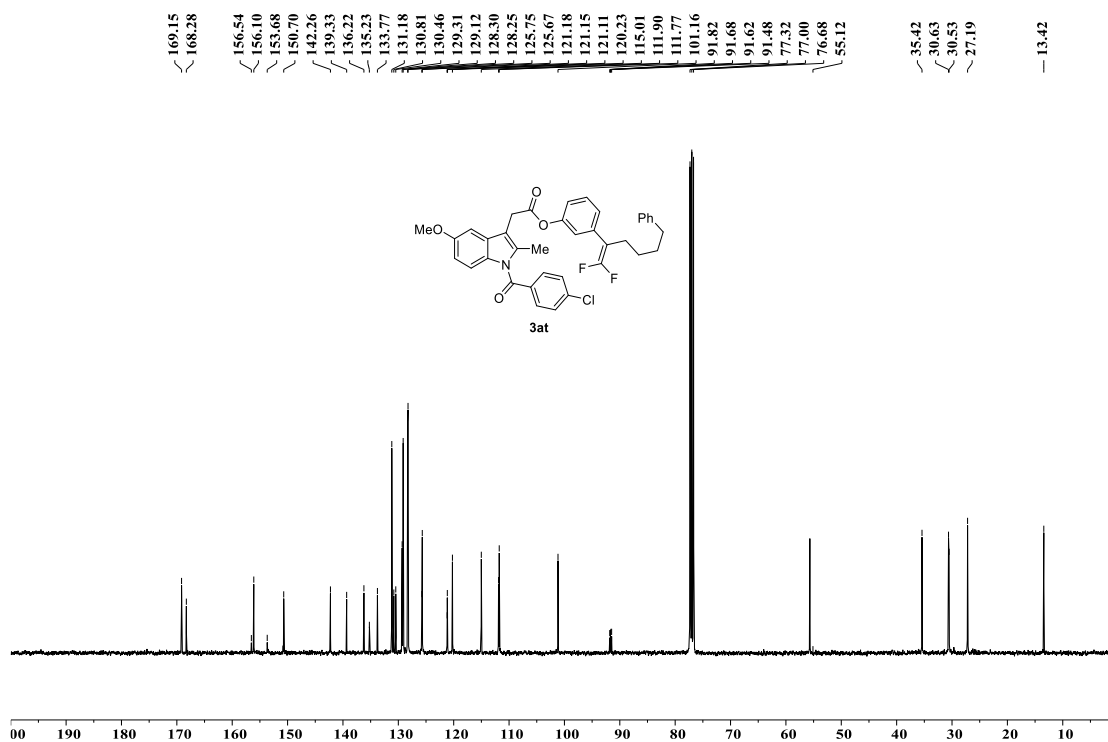

<sup>19</sup>F NMR (376 MHz, CDCl<sub>3</sub>)

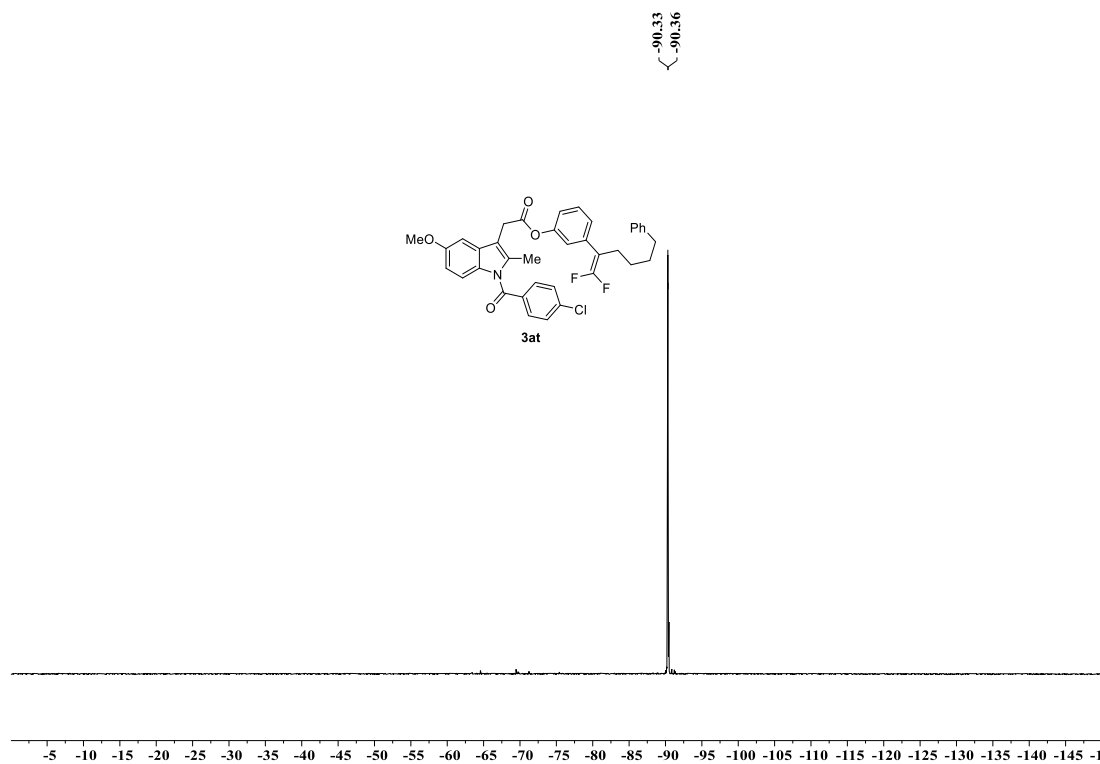

$^1\text{H}$  NMR (400 MHz,  $\text{CDCl}_3$ )

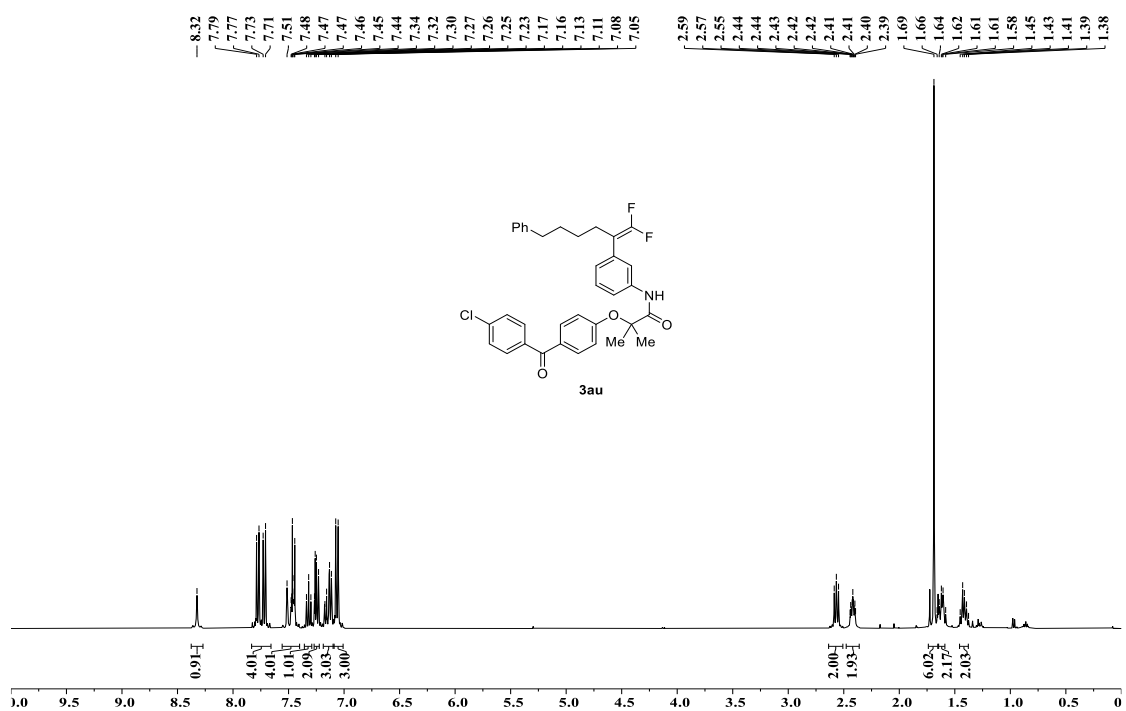

$^{13}\text{C}$  NMR (100 MHz,  $\text{CDCl}_3$ )

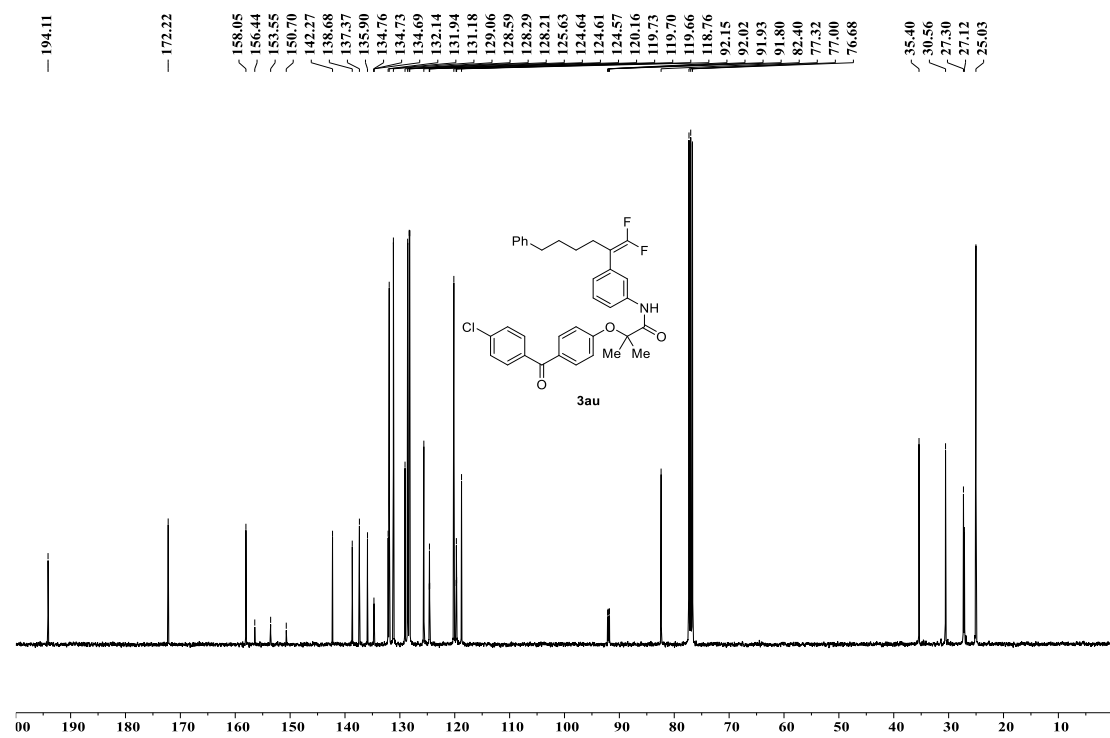

$^{19}\text{F}$  NMR (376 MHz,  $\text{CDCl}_3$ )

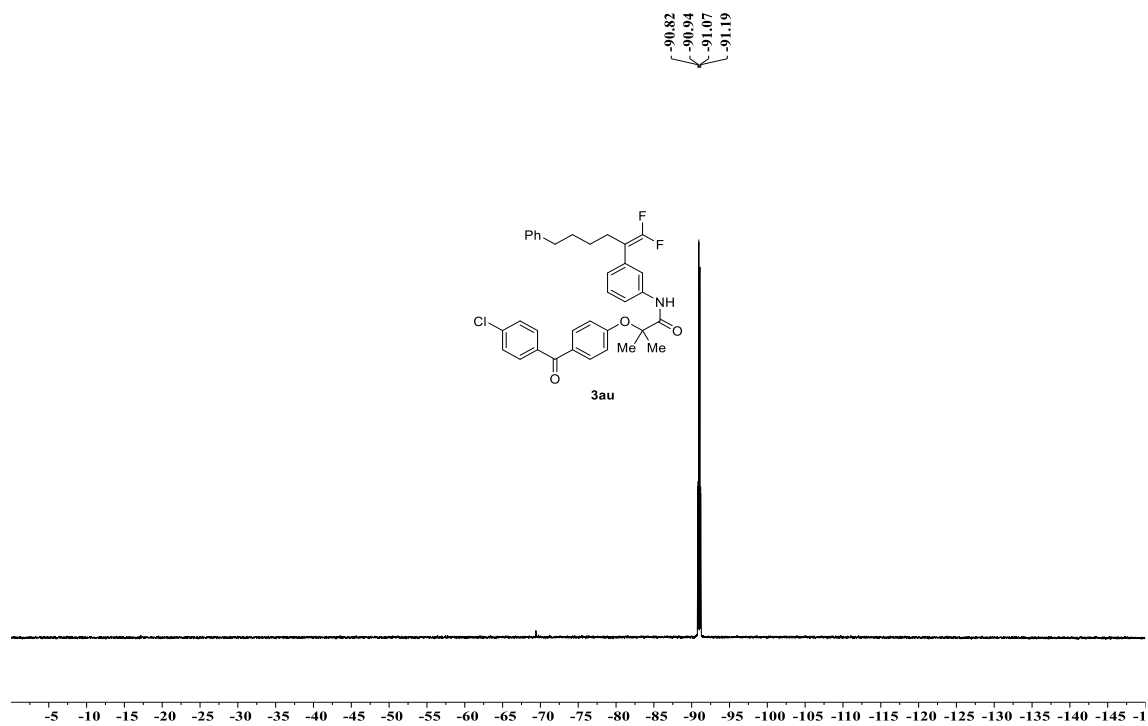

$^1\text{H}$  NMR (400 MHz,  $\text{CDCl}_3$ )

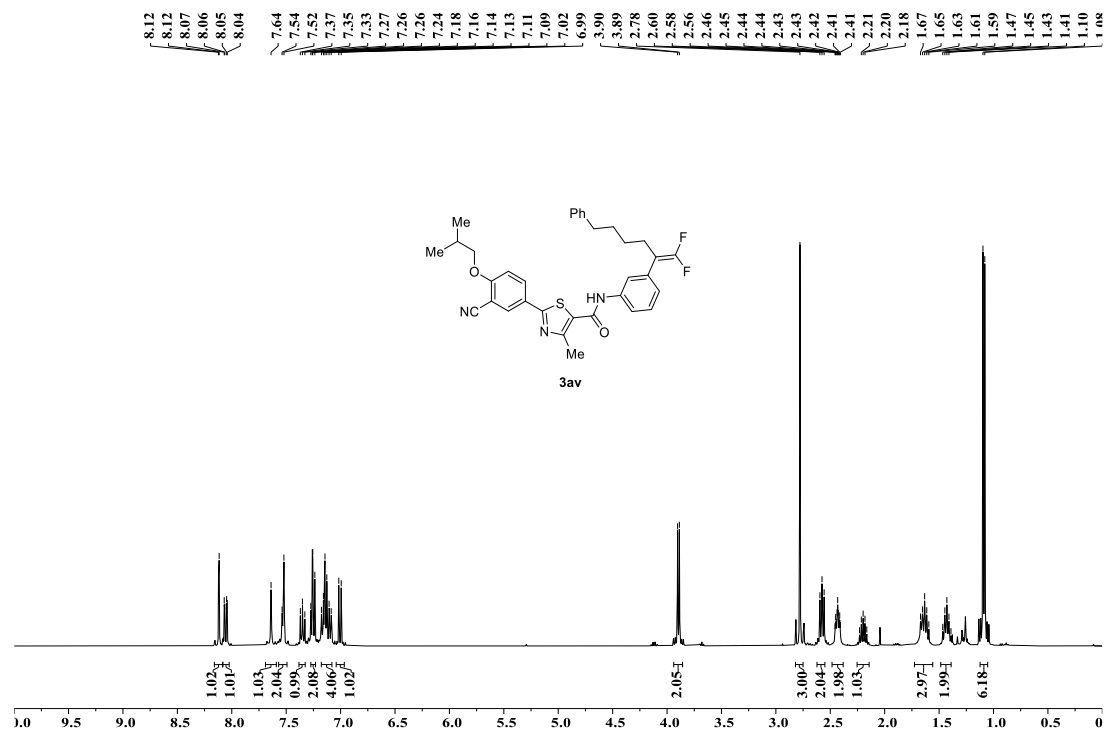

$^{13}\text{C}$  NMR (100 MHz,  $\text{CDCl}_3$ )

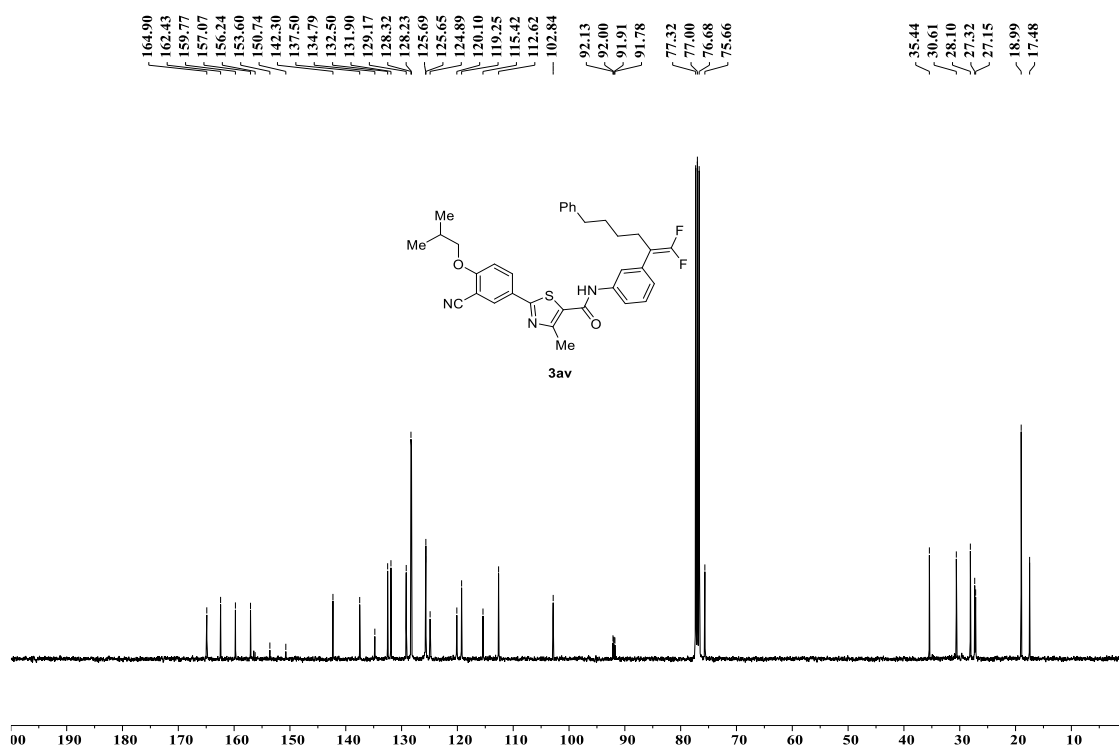

$^{19}\text{F}$  NMR (376 MHz,  $\text{CDCl}_3$ )

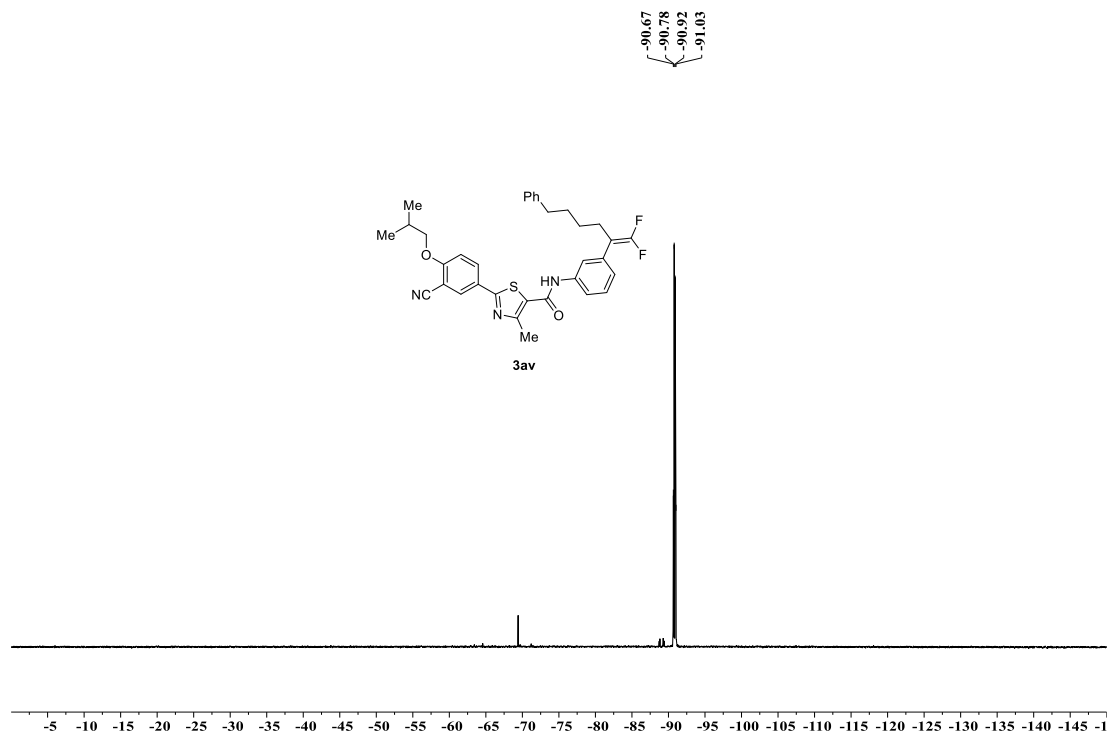

$^1\text{H}$  NMR (400 MHz,  $\text{CDCl}_3$ )

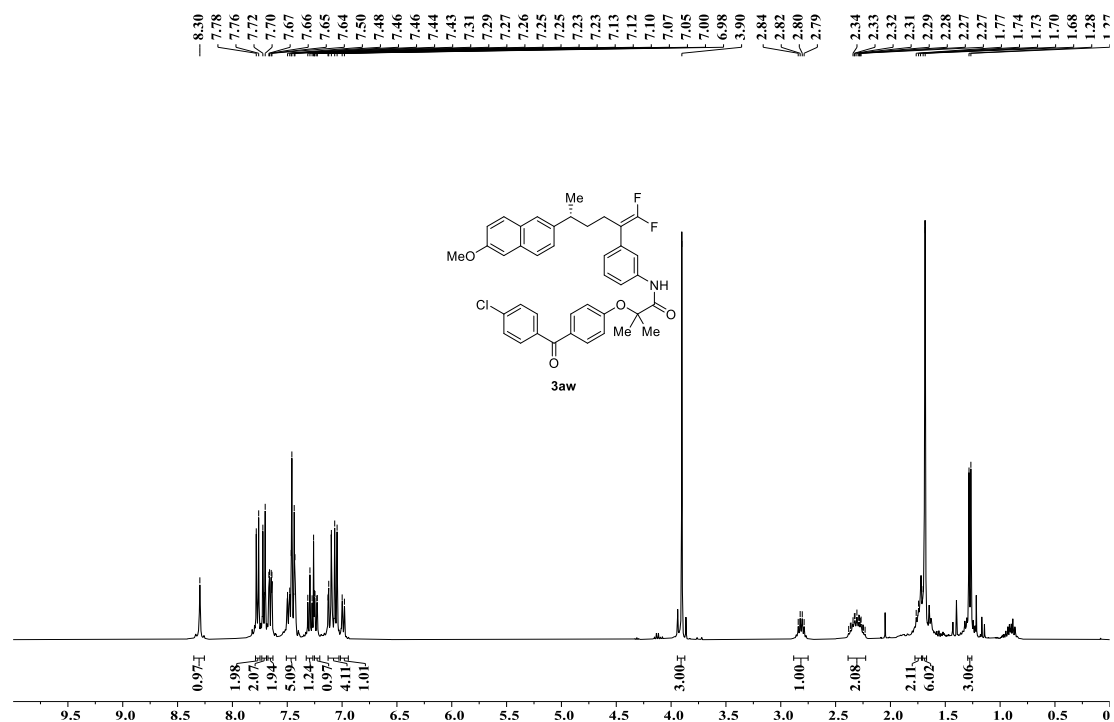

$^{13}\text{C}$  NMR (100 MHz,  $\text{CDCl}_3$ )

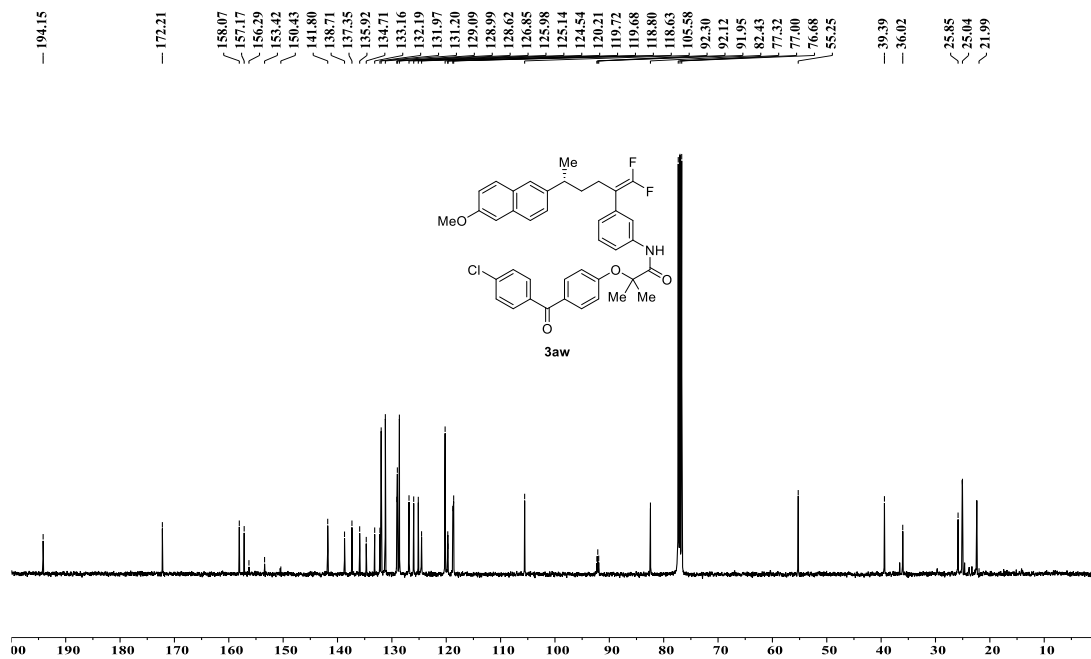

$^{19}\text{F}$  NMR (376 MHz,  $\text{CDCl}_3$ )

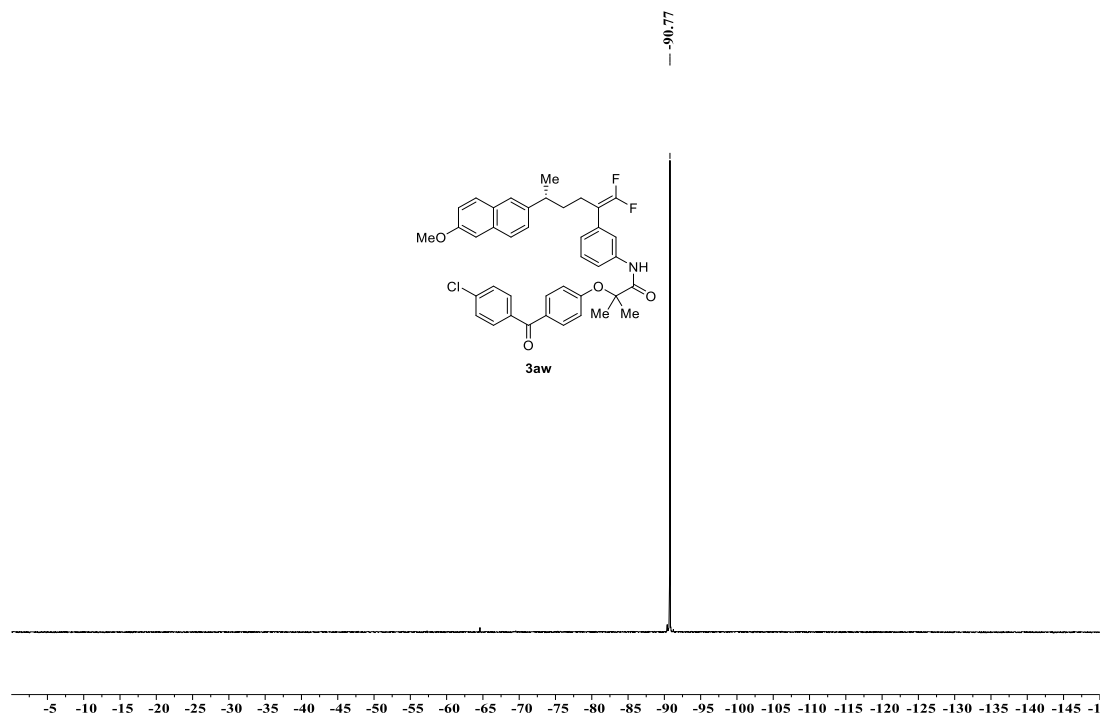

$^1\text{H}$  NMR (400 MHz,  $\text{CDCl}_3$ )

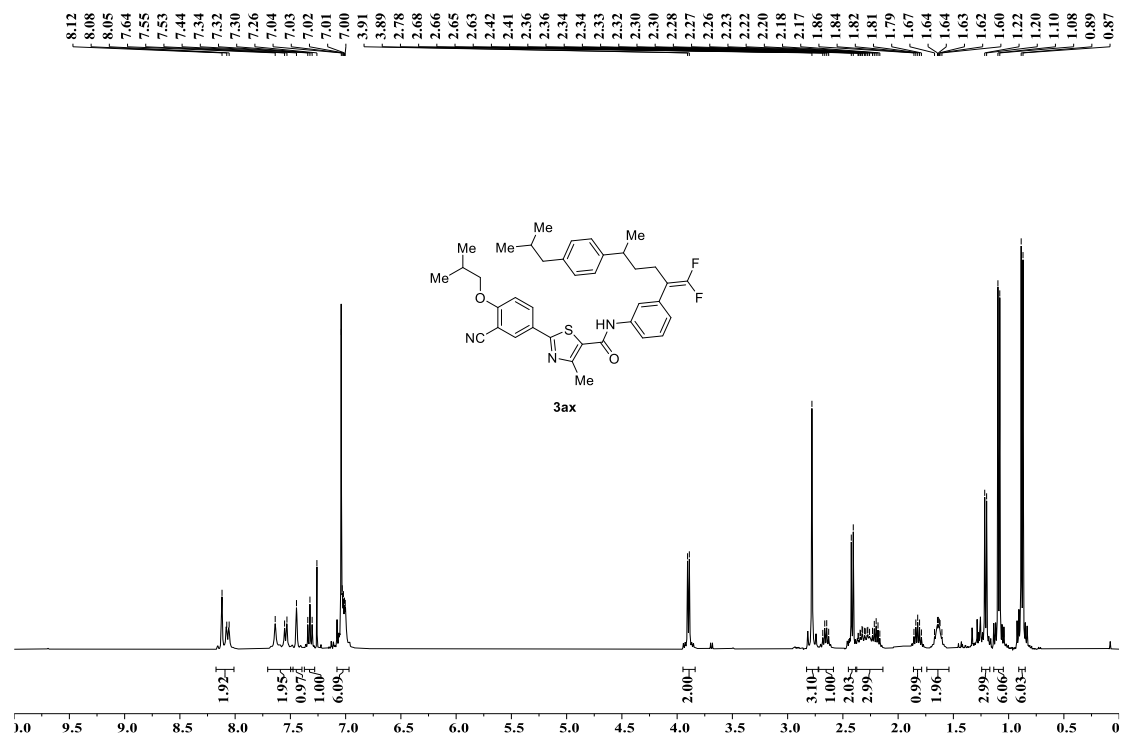

<sup>13</sup>C NMR (100 MHz, CDCl<sub>3</sub>)

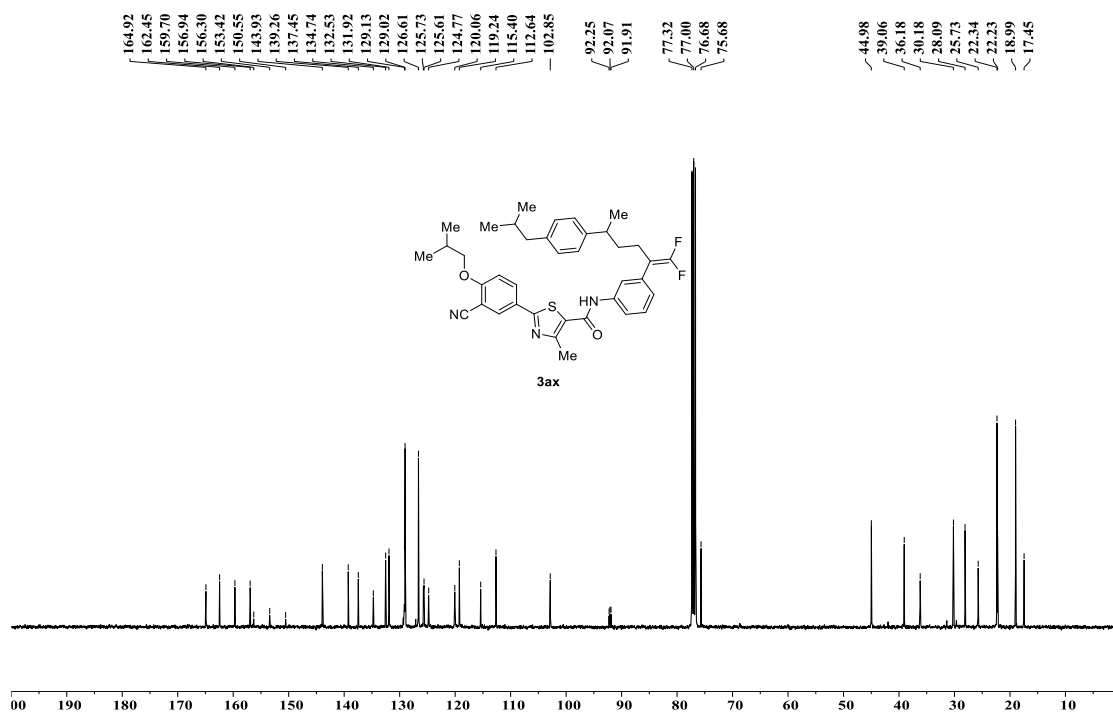

<sup>19</sup>F NMR (376 MHz, CDCl<sub>3</sub>)

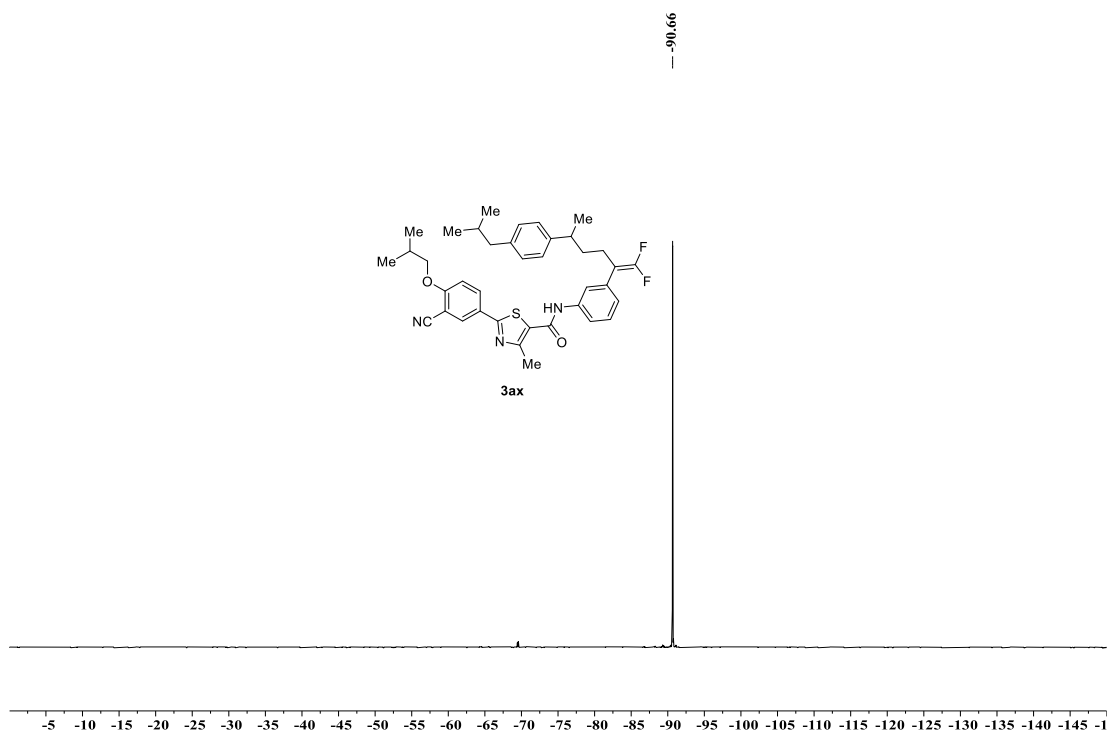



$^1\text{H}$  NMR (400 MHz,  $\text{CDCl}_3$ )

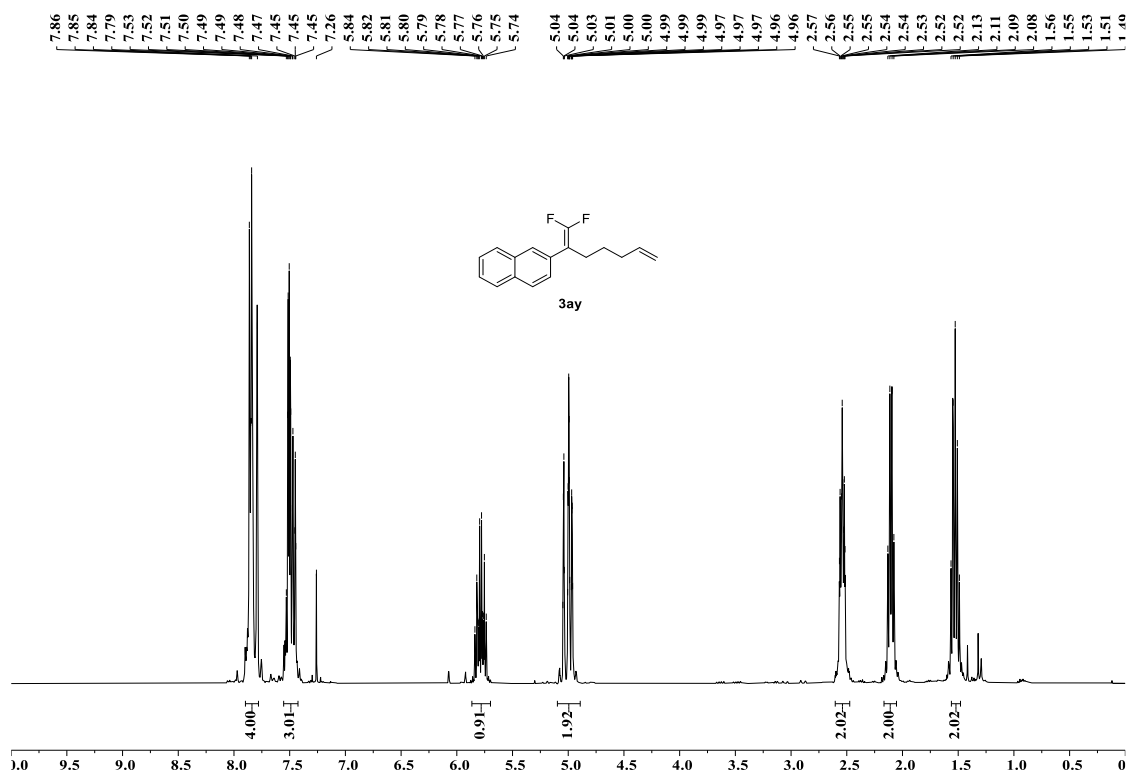

$^{13}\text{C}$  NMR (100 MHz,  $\text{CDCl}_3$ )

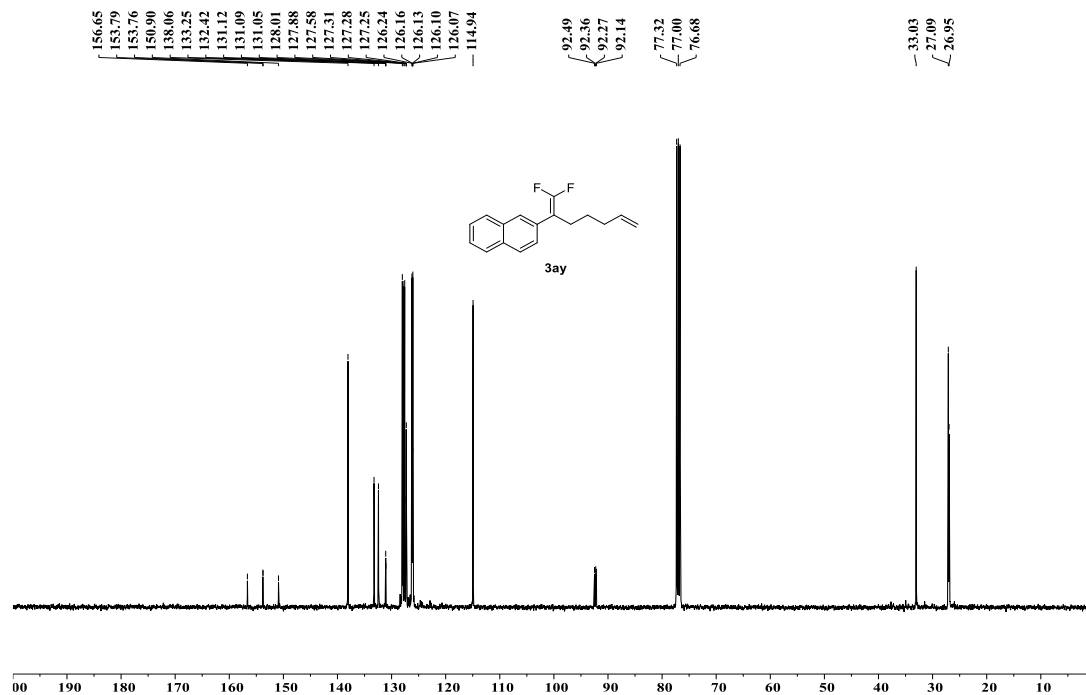

$^{19}\text{F}$  NMR (376 MHz,  $\text{CDCl}_3$ )

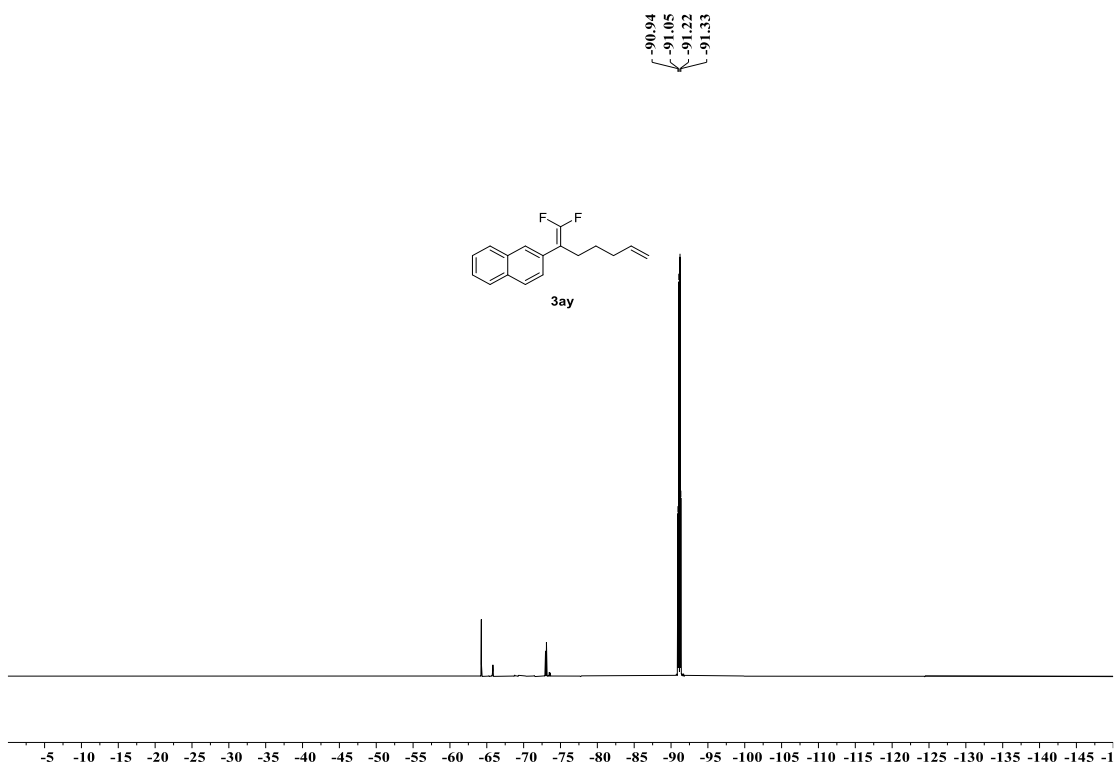

$^1\text{H}$  NMR (400 MHz,  $\text{CDCl}_3$ )

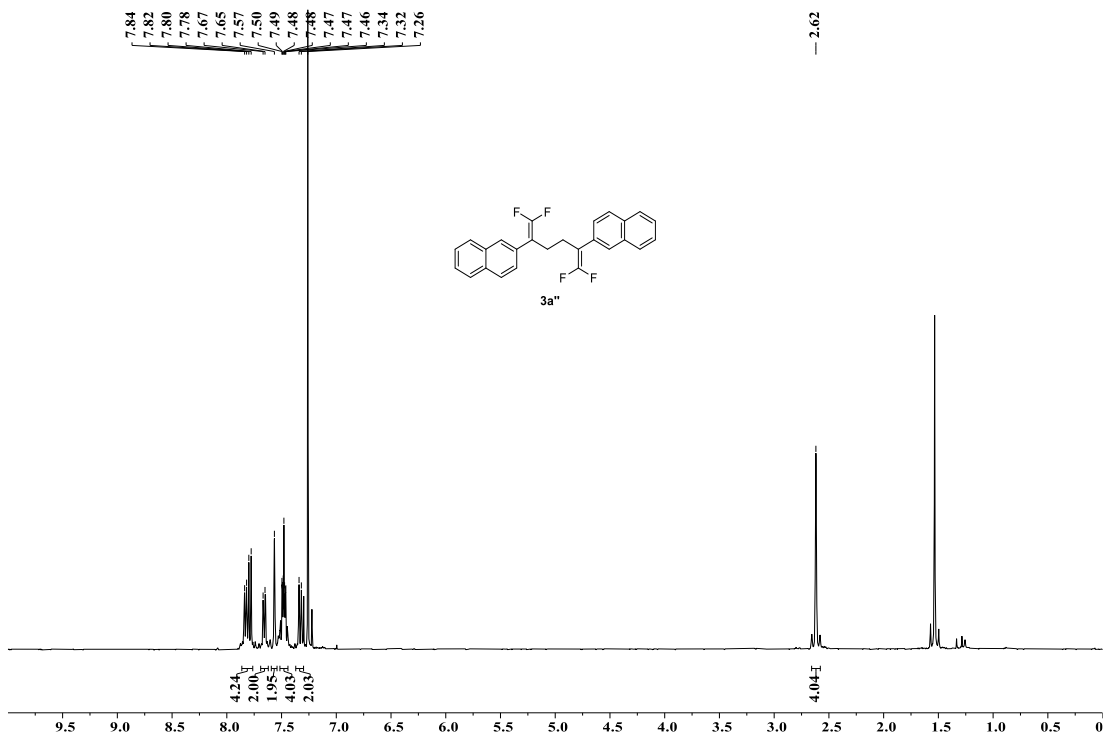

$^{13}\text{C}$  NMR (100 MHz,  $\text{CDCl}_3$ )

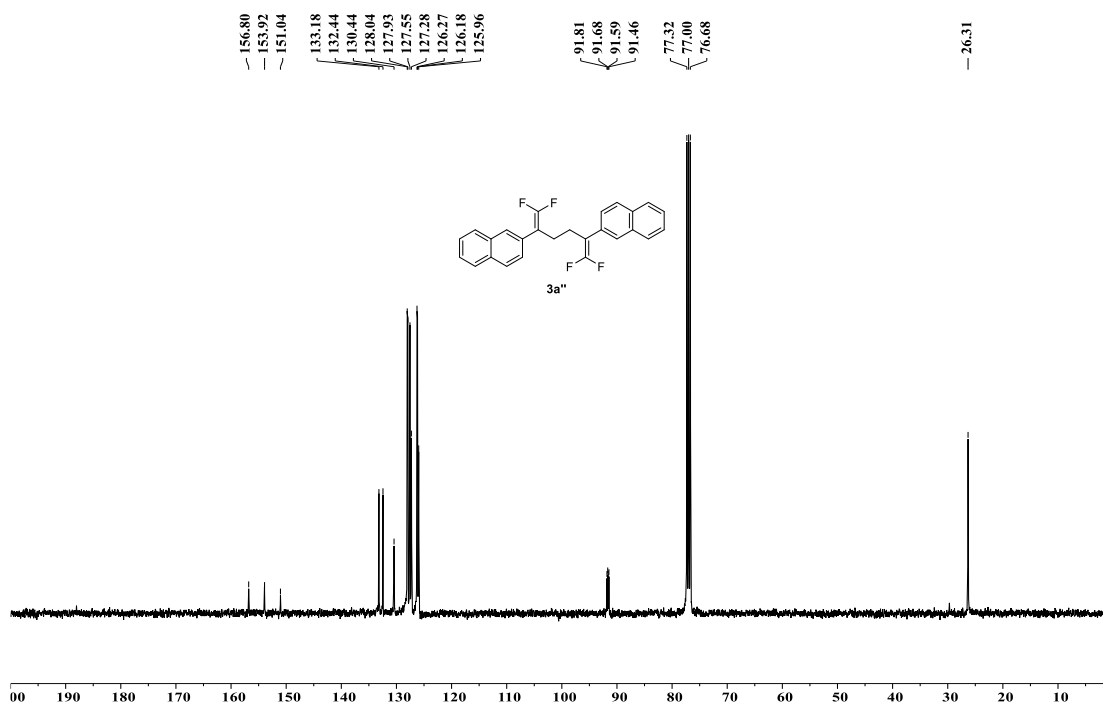

$^{19}\text{F}$  NMR (376 MHz,  $\text{CDCl}_3$ )

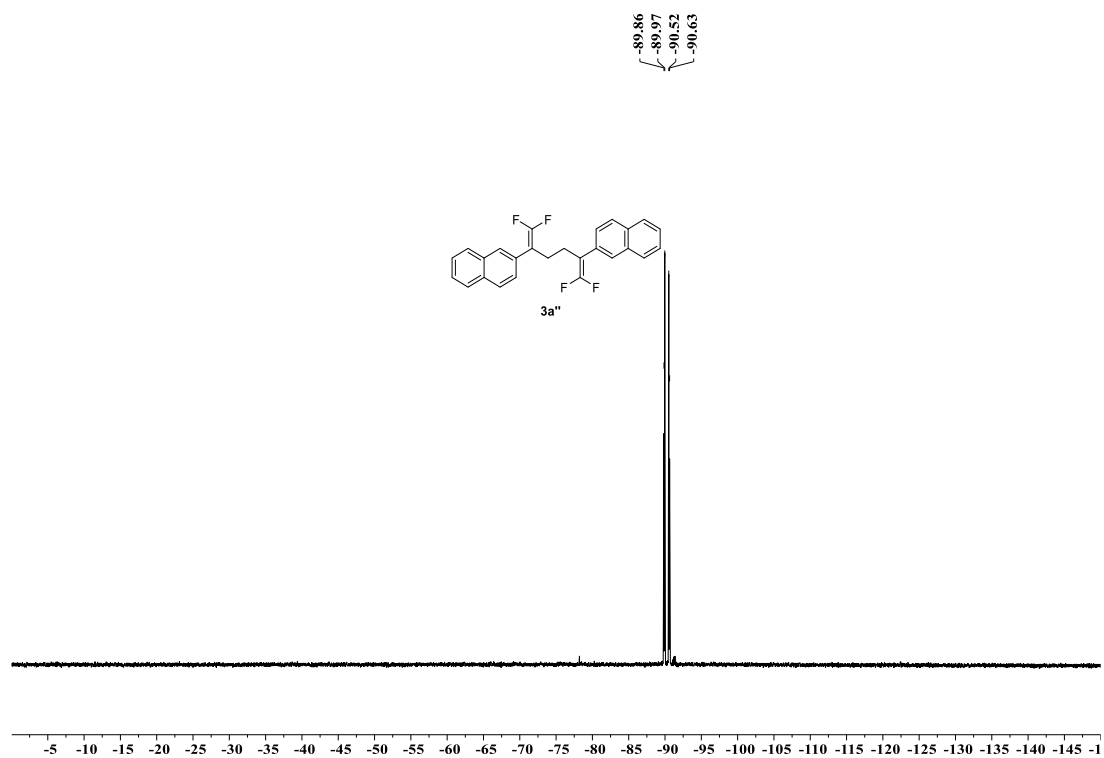

Supplement: d3ob00333g1.pdf [file d3ob00333g1.pdf]
